# Supplementary material for: Lignocellulose Fermentation Products Generated by Giant Panda Gut Microbiomes Depend Ultimately on pH Rather than Portion of Bamboo: A Preliminary Study
Source: Microorganisms. 2022 May 7;10(5):978. doi: 10.3390/microorganisms10050978 (PMC9146640; doi:10.3390/microorganisms10050978)
Supplement: Supplementary file 1 [file microorganisms-10-00978-s001.zip]

Archive with 6 entries (6 files):
- Supplementary Information.pdf
- Table S2 All Biological Pathways.xlsx
- Table S3 All Carbohydrate Active Enzymes.xlsx
- Table S4 All Metaproteins.xlsx
- Table S5 Enriched Taxa.xlsx
- Table S6 All 16S data.xlsx
