# Supplementary material for: Lignocellulose Fermentation Products Generated by Giant Panda Gut Microbiomes Depend Ultimately on pH Rather than Portion of Bamboo: A Preliminary Study
Source: Microorganisms. 2022 May 7;10(5):978. doi: 10.3390/microorganisms10050978 (PMC9146640; doi:10.3390/microorganisms10050978)
Supplement: Supplementary file 1 [file microorganisms-10-00978-s001.zip › Table S2 All Biological Pathways.xlsx]

## Sheet: Table S2A
	Table S2A. Expression of microbial metaproteins related to biological functions (UniProtBB keyword) in in vitro incubation tests with microbiomes derived from giant panda gut samples (see Figure 1 for the complete experimental set up). The heat map red (low) to green (high) indicates increasing relative abundance. In the heat map for 'Maximum' expression levels indicates red (low) and blue (high).
	Inoculum	Standard			Standard			Dewatered					Tested conditions	Inoculum +Leaf vs. Inoculum			De-H2O Inoculum +Leaf vs. Inoculum +Leaf
	Added Substrate	Leaf			None			Leaf
	Label	Inoculum +Leaf			Inoculum			De-H2O Inoculum +Leaf					Aim of the comparison	Impact of bamboo addition in presenc of soluble organics from giant panda digestion system			Impact of dewatering, thus forcing bamboo degradation
	Replicate	1	2	3	1	2	3	1	2	3
	Biological Function										Maximum		Biological Function	TTEST	log2 FC		TTEST	log2 FC
	Capsule biogenesis/degradation	0	0	0	0	0	0	0.232288	0.280987	0.237624	0.280987		Capsule biogenesis/degradation	-	-		0.00377418	-
	Sodium transport	0	0	0	0	0	0	0.058072	0.0936622	0.0792079	0.0936622		Sodium transport	-	-		0.0175484	-
	Serine biosynthesis	0	0	0	0	0	0	0.232288	0.156104	0.158416	0.232288		Serine biosynthesis	-	-		0.0183242	-
	Fucose metabolism	0.310366	0.269179	0.430725	0.10395	0	0.161031	0	0	0	0.430725		Fucose metabolism	0.0213339	1.93078		0.0200902	-
	Asparagine biosynthesis	0	0	0	0	0	0	0.522648	0.312207	0.39604	0.522648		Asparagine biosynthesis	-	-		0.0215094	-
	Arginine metabolism	0	0	0	0.10395	0.0766284	0	0.058072	0.124883	0.0792079	0.124883		Arginine metabolism	0.192692	-		0.0473164	-
	Purine salvage	0	0.0672948	0	0	0	0	0.406504	0.280987	0.237624	0.406504		Purine salvage	0.42265	-		0.0173207	3.78107
	Purine biosynthesis	0.18622	0.201884	0.28715	0.623701	0.229885	0.322061	1.4518	1.87324	1.50495	1.87324		Purine biosynthesis	0.293845	-0.799953		0.00659587	2.83852
	Branched-chain amino acid biosynthesis	0	0	0.143575	0	0.153257	0.161031	0.232288	0.468311	0.316832	0.468311		Branched-chain amino acid biosynthesis	0.468045	-1.13028		0.0308674	2.82505
	Cysteine biosynthesis	0	0	0.0717875	0	0.0766284	0	0.174216	0.124883	0.19802	0.19802		Cysteine biosynthesis	0.965447	-0.0941455		0.0119453	2.79179
	Pyrimidine biosynthesis	0.18622	0.0672948	0	0.2079	0.0766284	0.161031	0.29036	0.374649	0.316832	0.374649		Pyrimidine biosynthesis	0.396708	-0.813549		0.0307225	1.95342
	Hydrogen ion transport	0.124146	0	0.143575	0.2079	0.153257	0.483092	0.29036	0.280987	0.316832	0.483092		Hydrogen ion transport	0.19166	-1.65693		0.0380006	1.73012
	ATP synthesis	0.124146	0	0.143575	0.2079	0.153257	0.483092	0.29036	0.280987	0.316832	0.483092		ATP synthesis	0.19166	-1.65693		0.0380006	1.73012
	Protein biosynthesis	1.92427	2.42261	2.36899	2.079	2.68199	2.25443	6.03949	6.931	6.17822	6.931		Protein biosynthesis	0.697598	-0.0629559		0.000734467	1.5116
	Glycolysis	9.80757	12.6514	13.2807	17.4636	13.3333	22.5443	32.0557	29.4724	24.396	32.0557		Glycolysis	0.146316	-0.577725		0.00783205	1.26554
	Diaminopimelate biosynthesis	0.18622	0.201884	0.143575	0.10395	0.153257	0.483092	0.406504	0.343428	0.514851	0.514851		Diaminopimelate biosynthesis	0.619485	-0.477552		0.0288092	1.25026
	Glycerol metabolism	0.124146	0.0672948	0.143575	0	0	0	0.232288	0.187324	0.19802	0.232288		Glycerol metabolism	0.0395283	-		0.0336988	0.882517
	Phosphotransferase system	1.55183	1.3459	1.22039	1.55925	1.30268	0.966184	2.32288	2.49766	2.41584	2.49766		Phosphotransferase system	0.655855	0.105349		0.00239173	0.813285
	Amino-acid biosynthesis	1.42768	1.21131	0.933238	0.623701	0.996169	1.44928	1.91638	1.77958	2.09901	2.09901		Amino-acid biosynthesis	0.58602	0.218987		0.0170547	0.697977
	Peptide transport	0.18622	0.201884	0.215363	0.2079	0.153257	0.322061	0.116144	0.124883	0.158416	0.322061		Peptide transport	0.648245	-0.179072		0.0160283	-0.595285
	Iron storage	5.27623	5.78735	5.31228	4.5738	4.52107	3.22061	2.9036	3.49672	4.11881	5.78735		Iron storage	0.0780973	0.411096		0.0171768	-0.638554
	Transport	14.2148	15.6124	13.9268	14.657	15.0192	12.8824	8.47851	9.02279	9.50495	15.6124		Transport	0.661528	0.039963		0.00207362	-0.696119
	Cell shape	0.869025	0.605653	0.717875	0.727651	0.91954	0	0.464576	0.468311	0.277228	0.91954		Cell shape	0.587765	0.412604		0.031298	-0.857468
	Cell wall biogenesis/degradation	0.869025	0.605653	0.717875	0.831601	0.91954	0.161031	0.406504	0.468311	0.316832	0.91954		Cell wall biogenesis/degradation	0.740358	0.1974		0.0288676	-0.879655
	Detoxification	0.434513	0.336474	0.358938	0.519751	0.45977	0.805153	0.116144	0.249766	0.237624	0.805153		Detoxification	0.169892	-0.659434		0.0332173	-0.90472
	Peptidoglycan synthesis	0.869025	0.605653	0.717875	0.727651	0.91954	0	0.406504	0.468311	0.277228	0.91954		Peptidoglycan synthesis	0.587765	0.412604		0.0249808	-0.928418
	Ion transport	9.37306	10.0269	9.83489	10.1871	10.0383	9.82287	4.87805	4.05869	4.67327	10.1871		Ion transport	0.304982	-0.0395929		0.00011055	-1.10302
	Antibiotic resistance	0.18622	0.269179	0.28715	0.10395	0.153257	0	0.058072	0.0936622	0.158416	0.28715		Antibiotic resistance	0.0487094	1.52956		0.0281748	-1.25952
	Carbohydrate metabolism	2.73122	2.42261	3.4458	1.76715	1.91571	2.89855	0.754936	1.28005	1.34653	3.4458		Carbohydrate metabolism	0.224592	0.385878		0.0128023	-1.3466
	Conjugation	7.63501	7.60431	8.0402	9.14761	8.81226	9.01771	2.96167	2.49766	3.12871	9.14761		Conjugation	0.00301401	-0.2127		5.76639e-05	-1.43866
	Hydrogen peroxide	0.372439	0.336474	0.28715	0	0.153257	0	0.116144	0.0936622	0.118812	0.372439		Hydrogen peroxide	0.0172978	2.70029		0.00733182	-1.59983
	Glucose metabolism	1.48976	1.48048	2.08184	1.55925	1.30268	2.0934	0.29036	0.468311	0.514851	2.0934		Glucose metabolism	0.921331	0.027896		0.0159092	-1.98805
	Translation regulation	1.67598	1.2786	1.36396	1.35135	0.842912	0.322061	0.232288	0.187324	0.316832	1.67598		Translation regulation	0.170078	0.779226		0.00602306	-2.5519
	DNA excision	0.248293	0.13459	0.28715	0	0.0766284	0.966184	0	0	0.0792079	0.966184		DNA excision	0.728661	-0.638176		0.0301468	-3.08051
	Porphyrin biosynthesis	0.620732	0.403769	0.789663	0.623701	0.766284	0.644122	0	0.0936622	0.0792079	0.789663		Porphyrin biosynthesis	0.590773	-0.165091		0.0324164	-3.39154
	Amino-acid transport	0.744879	0.740242	0.502513	0.831601	0.91954	0.161031	0.058072	0.0312207	0.039604	0.91954		Amino-acid transport	0.928256	0.0558399		0.015548	-3.94676
	DNA condensation	4.71757	5.1144	4.73798	4.158	4.0613	2.73752	2.38095	3.49672	3.80198	5.1144		DNA condensation	0.110195	0.411165		0.0535693	-0.589968
	Cobalamin biosynthesis	0	0	0.0717875	0	0	0.161031	0.116144	0.124883	0.118812	0.161031		Cobalamin biosynthesis	0.650308	-1.16553		0.0553173	2.32555
	Methionine biosynthesis	0	0	0	0	0	0.483092	0.058072	0.0312207	0.0792079	0.483092		Methionine biosynthesis	0.42265	-		0.0560292	-
	Riboflavin biosynthesis	0.372439	0.538358	0.28715	0.4158	0.536398	0	0.116144	0.187324	0.158416	0.538358		Riboflavin biosynthesis	0.679541	0.33123		0.0703146	-1.37496
	Tryptophan biosynthesis	0.0620732	0.13459	0.143575	0.2079	0.153257	0	0	0.0624415	0.039604	0.2079		Tryptophan biosynthesis	0.924834	-0.0860825		0.0727737	-1.73733
	Sporulation	0.18622	0.269179	0.215363	0.2079	0.153257	0.322061	0.29036	0.280987	0.316832	0.322061		Sporulation	0.945066	-0.0265468		0.0792428	0.40505
	Transcription antitermination	0	0	0	0	0	0	0.116144	0.0624415	0.039604	0.116144		Transcription antitermination	-	-		0.0850653	-
	Electron transport	0.496586	0.605653	0.5743	0.935551	0.842912	1.28824	0.174216	0.468311	0.316832	1.28824		Electron transport	0.0688932	-0.871205		0.0919796	-0.805344
	Aromatic amino acid biosynthesis	0.310366	0.336474	0.143575	0.31185	0.229885	0.161031	0.058072	0.0936622	0.118812	0.336474		Aromatic amino acid biosynthesis	0.716826	0.169566		0.0931249	-1.54674
	Lipopolysaccharide biosynthesis	0.0620732	0	0	0	0	0	0.058072	0.187324	0.118812	0.187324		Lipopolysaccharide biosynthesis	0.42265	-		0.0960331	2.55272
	GMP biosynthesis	0	0	0	0.10395	0	0	0.348432	0.312207	0.0792079	0.348432		GMP biosynthesis	0.42265	-		0.099791	-
	Transcription termination	0.310366	0	0.0717875	0	0	0	0.29036	0.405869	0.356436	0.405869		Transcription termination	0.307395	-		0.128148	1.46182
	Pyridoxine biosynthesis	0.0620732	0	0	0	0	0	0.406504	0.124883	0.158416	0.406504		Pyridoxine biosynthesis	0.42265	-		0.136267	3.47414
	Phosphate transport	0.0620732	0.0672948	0.0717875	0	0.0766284	0	0.058072	0.0312207	0	0.0766284		Phosphate transport	0.244706	1.39236		0.152974	-1.1717
	Exopolysaccharide synthesis	0	0	0	0	0	0	0.174216	0.0624415	0.039604	0.174216		Exopolysaccharide synthesis	-	-		0.157238	-
	Pyridine nucleotide biosynthesis	0	0.0672948	0	0	0	0	0.058072	0.0624415	0.0792079	0.0792079		Pyridine nucleotide biosynthesis	0.42265	-		0.180914	1.56942
	Competence	0.18622	0.538358	0.215363	0.2079	0.153257	0.322061	0.058072	0.0624415	0.158416	0.538358		Competence	0.541756	0.460223		0.183058	-1.75267
	Nitrate assimilation	0	0	0	0	0	0	0	0.0312207	0.039604	0.039604		Nitrate assimilation	-	-		0.189164	-
	Threonine biosynthesis	0	0.0672948	0	0	0.0766284	0	0.116144	0.0624415	0.039604	0.116144		Threonine biosynthesis	0.931548	-0.187384		0.190033	1.69702
	Transcription	2.23464	2.01884	1.57933	2.2869	2.52874	0.483092	3.3101	1.93569	2.81188	3.3101		Transcription	0.812925	0.138543		0.198577	0.466173
	Xylose metabolism	0.558659	0.336474	0.502513	0	0.153257	0.161031	0.29036	0.343428	0.39604	0.558659		Xylose metabolism	0.0146963	2.15284		0.199606	-0.440596
	Cell cycle	1.42768	0.874832	1.07681	1.55925	1.6092	0.322061	0.754936	0.87418	0.871287	1.6092		Cell cycle	0.940451	-0.0467002		0.206599	-0.434576
	Cell division	1.42768	0.874832	1.07681	1.55925	1.6092	0.322061	0.754936	0.87418	0.871287	1.6092		Cell division	0.940451	-0.0467002		0.206599	-0.434576
	Xylan degradation	0.124146	0	0.0717875	0	0	0	0	0	0	0.124146		Xylan degradation	0.211183	-		0.211183	-
	Aromatic hydrocarbons catabolism	0.0620732	0.269179	0.143575	0.2079	0	0	0.058072	0.0312207	0.0792079	0.269179		Aromatic hydrocarbons catabolism	0.388396	1.19151		0.228383	-1.49465
	Rhamnose metabolism	0	0.0672948	0.143575	0	0.0766284	0	0	0	0	0.143575		Rhamnose metabolism	0.419919	1.4604		0.232196	-
	Molybdenum cofactor biosynthesis	0.0620732	0	0	0	0	0.322061	0.232288	0.0312207	0.0792079	0.322061		Molybdenum cofactor biosynthesis	0.506043	-2.37529		0.259034	2.46497
	Polysaccharide degradation	0.124146	0	0.0717875	0	0	0	0	0.0312207	0	0.124146		Polysaccharide degradation	0.211183	-		0.263208	-2.64979
	Fatty acid metabolism	0.0620732	0	0.0717875	0	0.229885	0	0	0.0312207	0	0.229885		Fatty acid metabolism	0.722231	-0.78018		0.266612	-2.10016
	Fatty acid biosynthesis	0.0620732	0	0.0717875	0	0.229885	0	0	0.0312207	0	0.229885		Fatty acid biosynthesis	0.722231	-0.78018		0.266612	-2.10016
	Arginine biosynthesis	0.18622	0.201884	0.143575	0.10395	0	0	0.232288	0.187324	0.19802	0.232288		Arginine biosynthesis	0.0358321	2.35466		0.268048	0.216193
	Gluconate utilization	0.0620732	0	0.143575	0	0.0766284	0	0.174216	0.0936622	0.118812	0.174216		Gluconate utilization	0.437226	1.42423		0.292169	0.910999
	Virulence	3.22781	1.41319	0	1.14345	1.83908	0	0.058072	0.280987	0.39604	3.22781		Virulence	0.641235	0.637898		0.297549	-2.65843
	Ascorbate biosynthesis	0.0620732	0	0.0717875	0	0	0	0	0	0.039604	0.0717875		Ascorbate biosynthesis	0.185645	-		0.308967	-1.75702
	Isoprene biosynthesis	0.0620732	0.201884	0.0717875	0	0	0	0.116144	0.0312207	0	0.201884		Isoprene biosynthesis	0.131055	-		0.335312	-1.18797
	rRNA processing	0.124146	0.0672948	0.0717875	0	0.153257	0	0.058072	0.218545	0.158416	0.218545		rRNA processing	0.556316	0.780367		0.348557	0.724808
	Protein transport	0.310366	0.269179	0.215363	0.31185	0.536398	0.483092	0.174216	0.218545	0.277228	0.536398		Protein transport	0.103574	-0.74402		0.363169	-0.24665
	tRNA processing	0.124146	0.0672948	0	0.31185	0.153257	0.322061	0.058072	0.156104	0.118812	0.322061		tRNA processing	0.046606	-2.03977		0.364441	0.798567
	Arabinose catabolism	0	0	0.143575	0	0	0	0	0.280987	0.158416	0.280987		Arabinose catabolism	0.42265	-		0.367728	1.61374
	Potassium transport	0	0.201884	0.0717875	0	0.0766284	0	0	0.0312207	0.039604	0.201884		Potassium transport	0.389508	1.8365		0.371009	-1.95012
	Thiamine biosynthesis	0.558659	0.0672948	0	0.2079	0	0	0	0.0312207	0	0.558659		Thiamine biosynthesis	0.522132	1.59017		0.377132	-4.32548
	DNA recombination	0	0.13459	0.28715	0.10395	0.153257	0.161031	0	0.530752	0.475248	0.530752		DNA recombination	0.990177	0.0120302		0.377832	1.25421
	Translocation	0.124146	0.0672948	0	0	0.306513	0	0	0.0312207	0.039604	0.306513		Translocation	0.751033	-0.679049		0.381631	-1.43458
	One-carbon metabolism	0.18622	0.0672948	0.215363	0.10395	0.229885	0.483092	0.116144	0.156104	0.039604	0.483092		One-carbon metabolism	0.414695	-0.800998		0.412101	-0.58835
	Phospholipid biosynthesis	0	0	0.143575	0.2079	0.153257	0.161031	0	0.156104	0.19802	0.2079		Phospholipid biosynthesis	0.105863	-1.86276		0.415752	1.30245
	Phospholipid metabolism	0	0	0.143575	0.2079	0.153257	0.161031	0	0.156104	0.19802	0.2079		Phospholipid metabolism	0.105863	-1.86276		0.415752	1.30245
	Queuosine biosynthesis	0	0	0	0.10395	0	0.322061	0.058072	0	0	0.322061		Queuosine biosynthesis	0.27322	-		0.42265	-
	Lipid transport	0	0	0	0	0.0766284	0	0	0	0.118812	0.118812		Lipid transport	0.42265	-		0.42265	-
	Antiviral defense	0	0	0.0717875	0	0	0	0	0	0	0.0717875		Antiviral defense	0.42265	-		0.42265	-
	Heme biosynthesis	0	0	0.0717875	0	0	0	0	0	0	0.0717875		Heme biosynthesis	0.42265	-		0.42265	-
	DNA integration	0	0.0672948	0	0	0	0.161031	0	0	0	0.161031		DNA integration	0.632586	-1.25877		0.42265	-
	Proline biosynthesis	0	0	0.0717875	0	0.0766284	0	0	0	0	0.0766284		Proline biosynthesis	0.965447	-0.0941455		0.42265	-
	Catecholamine metabolism	0	0	0	0	0	0	0	0.0624415	0	0.0624415		Catecholamine metabolism	-	-		0.42265	-
	Glyoxylate bypass	0	0	0	0	0	0	0	0.0624415	0	0.0624415		Glyoxylate bypass	-	-		0.42265	-
	Biotin biosynthesis	0	0	0	0	0	0	0.058072	0	0	0.058072		Biotin biosynthesis	-	-		0.42265	-
	Isoleucine biosynthesis	0	0	0	0	0	0	0.058072	0	0	0.058072		Isoleucine biosynthesis	-	-		0.42265	-
	Phosphonate transport	0	0	0	0	0	0	0	0	0.039604	0.039604		Phosphonate transport	-	-		0.42265	-
	Cytochrome c-type biogenesis	0	0	0	0	0	0	0	0.0312207	0	0.0312207		Cytochrome c-type biogenesis	-	-		0.42265	-
	Cellulose degradation	0	0	0	0	0	0	0	0.0312207	0	0.0312207		Cellulose degradation	-	-		0.42265	-
	Glutathione biosynthesis	0	0	0	0	0	0	0	0.0312207	0	0.0312207		Glutathione biosynthesis	-	-		0.42265	-
	Pantothenate biosynthesis	0	0	0	0	0	0	0	0.0312207	0	0.0312207		Pantothenate biosynthesis	-	-		0.42265	-
	Tricarboxylic acid cycle	2.48293	1.68237	1.86648	1.76715	1.6092	0.322061	1.56794	1.71714	2.0198	2.48293		Tricarboxylic acid cycle	0.228928	0.705678		0.442884	-0.18526
	DNA replication	0.0620732	0.336474	0.215363	0.10395	0.153257	0.483092	2.38095	0.156104	0.158416	2.38095		DNA replication	0.785082	-0.270081		0.44834	2.13444
	Chemotaxis	0.124146	0.269179	0.0717875	0.10395	0.0766284	0	0.232288	0.187324	0.19802	0.269179		Chemotaxis	0.249478	1.36496		0.482285	0.409167
	Histidine biosynthesis	0.0620732	0.336474	0.0717875	0	0.229885	0.483092	0	0.0312207	0.19802	0.483092		Histidine biosynthesis	0.655601	-0.600168		0.506496	-1.03683
	Antibiotic biosynthesis	0	0.13459	0	0	0.0766284	0.161031	0	0	0.039604	0.161031		Antibiotic biosynthesis	0.623127	-0.820327		0.559076	-1.76485
	Transcription regulation	1.8622	1.61507	1.36396	1.8711	1.76245	0.161031	2.43902	1.0615	2.13861	2.43902		Transcription regulation	0.596941	0.351433		0.59826	0.220101
	Ribosome biogenesis	0.124146	0.0672948	0.0717875	0.10395	0.153257	0	0.058072	0.218545	0.0792079	0.218545		Ribosome biogenesis	0.970051	0.0333883		0.61176	0.434851
	Histidine metabolism	0	0.0672948	0	0	0	0	0	0.0312207	0	0.0672948		Histidine metabolism	0.42265	-		0.662005	-1.10799
	Gluconeogenesis	2.48293	2.75908	2.94329	1.6632	1.76245	2.0934	2.20674	3.15329	3.36634	3.36634		Gluconeogenesis	0.00889934	0.568615		0.673158	0.0923454
	Stress response	1.92427	2.35532	2.36899	3.3264	2.52874	4.50886	3.89082	1.43615	2.33663	4.50886		Stress response	0.157486	-0.640463		0.686103	0.204979
	Nucleotide biosynthesis	0.372439	0.269179	0.0717875	0	0.229885	0.161031	0	0.312207	0.237624	0.372439		Nucleotide biosynthesis	0.392592	0.867866		0.694343	-0.375735
	Antiport	0.0620732	0.0672948	0	0	0	0	0	0.0936622	0.0792079	0.0936622		Antiport	0.184168	-		0.711264	0.418208
	Lipid metabolism	0.0620732	0	0.215363	0.2079	0.45977	0.322061	0	0.187324	0.19802	0.45977		Lipid metabolism	0.0715494	-1.83488		0.711993	0.473994
	Lipid biosynthesis	0.0620732	0	0.215363	0.2079	0.45977	0.322061	0	0.187324	0.19802	0.45977		Lipid biosynthesis	0.0715494	-1.83488		0.711993	0.473994
	Restriction system	0	0	0.0717875	0	0	0	0	0.0312207	0.0792079	0.0792079		Restriction system	0.42265	-		0.717952	0.62131
	Leucine biosynthesis	0	0	0.0717875	0	0.0766284	0	0	0.0312207	0.0792079	0.0792079		Leucine biosynthesis	0.965447	-0.0941455		0.717952	0.62131
	Transposition	0	0.0672948	0	0	0	0	0	0	0.039604	0.0672948		Transposition	0.42265	-		0.744727	-0.764849
	Sugar transport	4.22098	5.04711	3.80474	2.39085	2.60536	0.966184	3.13589	4.77677	4.63366	5.04711		Sugar transport	0.0238524	1.13261		0.798816	-0.0593063
	Pentose shunt	1.8622	1.48048	2.08184	0.935551	1.30268	1.28824	1.33566	1.74836	2.13861	2.13861		Pentose shunt	0.0479438	0.621267		0.829175	-0.0547186
	Coenzyme A biosynthesis	0	0.0672948	0.215363	0.2079	0.153257	0.483092	0.232288	0.0312207	0.0792079	0.483092		Coenzyme A biosynthesis	0.208015	-1.57861		0.830982	0.277963
	Methanogenesis	0.18622	0	0	0	0.153257	0.322061	0.116144	0	0.039604	0.322061		Methanogenesis	0.44401	-1.35189		0.894755	-0.257793
	SOS response	0.310366	0.13459	0.430725	0.10395	0.153257	0.966184	0.058072	0.43709	0.435644	0.966184		SOS response	0.724731	-0.482408		0.910708	0.0880751
	Galactose metabolism	0	0.0672948	0	0	0	0	0.058072	0	0	0.0672948		Galactose metabolism	0.42265	-		0.922457	-0.212651
	Septation	0.124146	0.0672948	0.143575	0.10395	0.229885	0	0.116144	0.0936622	0.118812	0.229885		Septation	0.995952	0.00509521		0.93649	-0.0278192
	Tryptophan catabolism	0.124146	0	0.143575	0	0	0	0.116144	0.0624415	0.0792079	0.143575		Tryptophan catabolism	0.185645	-		0.949858	-0.0545177
	DNA damage	0.372439	0.403769	0.789663	0.10395	0.383142	1.61031	0.29036	0.655635	0.633663	1.61031		DNA damage	0.743753	-0.421636		0.980747	0.012648
	DNA repair	0.372439	0.403769	0.789663	0.10395	0.383142	1.61031	0.29036	0.655635	0.633663	1.61031		DNA repair	0.743753	-0.421636		0.980747	0.012648
	Lysine biosynthesis	0.869025	0.269179	0.143575	0.10395	0.229885	0.483092	0.406504	0.374649	0.514851	0.869025		Lysine biosynthesis	0.580269	0.649869		0.985172	0.0159225
	Two-component regulatory system	0.0620732	0	0.143575	0	0.0766284	0	0.058072	0.0312207	0.118812	0.143575		Two-component regulatory system	0.437226	1.42423		0.987611	0.0171301
	Chromosome partition	0	0	0.0717875	0	0	0.322061	0	0.0312207	0.039604	0.322061		Chromosome partition	0.521079	-2.16553		0.991206	-0.0194804
	Nitrogen fixation	0.0620732	0.0672948	0.143575	0.4158	0.306513	0.483092	0.116144	0.156104	0	0.483092		Nitrogen fixation	0.0128024	-2.14285		0.996816	-0.00368007
	Fimbrium biogenesis	0	0	0	0.10395	0.0766284	0	0	0	0	0.10395		Fimbrium biogenesis	0.192692	-		-	-
	Lipid A biosynthesis	0	0	0	0	0.0766284	0.161031	0	0	0	0.161031		Lipid A biosynthesis	0.230584	-		-	-
	Nucleotide metabolism	0	0	0	0	0	0.161031	0	0	0	0.161031		Nucleotide metabolism	0.42265	-		-	-
	RNA repair	0	0	0	0	0.0766284	0	0	0	0	0.0766284		RNA repair	0.42265	-		-	-
	Nickel insertion	0	0	0	0	0.0766284	0	0	0	0	0.0766284		Nickel insertion	0.42265	-		-	-
	Bacterial flagellum biogenesis	0	0	0	0	0.0766284	0	0	0	0	0.0766284		Bacterial flagellum biogenesis	0.42265	-		-	-
	Bacterial flagellum protein export	0	0	0	0	0.0766284	0	0	0	0	0.0766284		Bacterial flagellum protein export	0.42265	-		-	-
	TOTAL	100	100	100	100	100	100	100	100	100

## Sheet: Table S2B
	Table S2B. Expression of microbial metaproteins related to biological functions (UniProtBB keyword) in in vitro incubation tests with microbiomes derived from giant panda gut samples (see Figure 1 for the experimental set up). The values for Inoculum +Leaf (pH 6.5) are the same as Inoculum +Leaf in Table S1A, and are reported here for convenience of comparison. The heat map red (low) to green (hi…
	Inoculum	Standard			Standard					Tested conditions	Inoculum +Leaf pH 4.5 vs. 6.5
	Added Substrate	Leaf			Leaf
	Label	Inoculum +Leaf (pH 6.5)			Inoculum +Leaf (pH 4.5)					Aim of the comparison	Impact of pH decrease on fermentation
	Replicate	1	2	3	1	2	3
	Biological Function							Maximum		Biological Function	TTEST	log2 FC
	Hydrogen peroxide	0.372439	0.336474	0.28715	0	0	0	0.372439		Hydrogen peroxide	0.00549821	-
	Xylose metabolism	0.558659	0.336474	0.502513	0	0	0	0.558659		Xylose metabolism	0.0198899	-
	Fucose metabolism	0.310366	0.269179	0.430725	0	0	0	0.430725		Fucose metabolism	0.0200902	-
	Methionine biosynthesis	0	0	0	0.0453721	0.0485437	0.0282885	0.0485437		Methionine biosynthesis	0.023024	-
	Serine biosynthesis	0	0	0	0.362976	0.242718	0.169731	0.362976		Serine biosynthesis	0.0443708	-
	Exopolysaccharide synthesis	0	0	0	0.136116	0.194175	0.0848656	0.194175		Exopolysaccharide synthesis	0.0483187	-
	Purine salvage	0	0.0672948	0	0.725953	0.873786	0.480905	0.873786		Purine salvage	0.0243861	4.95039
	Pyrimidine biosynthesis	0.18622	0.0672948	0	0.952813	0.873786	0.594059	0.952813		Pyrimidine biosynthesis	0.0100948	3.25526
	Branched-chain amino acid biosynthesis	0	0	0.143575	0.544465	0.291262	0.367751	0.544465		Branched-chain amino acid biosynthesis	0.0226035	3.06733
	Purine biosynthesis	0.18622	0.201884	0.28715	1.04356	1.35922	0.905233	1.35922		Purine biosynthesis	0.018345	2.29246
	rRNA processing	0.124146	0.0672948	0.0717875	0.408348	0.291262	0.311174	0.408348		rRNA processing	0.00902378	1.94109
	Glycolysis	9.80757	12.6514	13.2807	46.6878	49.4175	30.6648	49.4175		Glycolysis	0.0317161	1.82662
	Diaminopimelate biosynthesis	0.18622	0.201884	0.143575	0.453721	0.38835	0.509194	0.509194		Diaminopimelate biosynthesis	0.00641014	1.34568
	Sugar transport	4.22098	5.04711	3.80474	2.85844	2.42718	1.86704	5.04711		Sugar transport	0.0147729	-0.870018
	Stress response	1.92427	2.35532	2.36899	1.36116	1.1165	0.820368	2.36899		Stress response	0.00650719	-1.01144
	Electron transport	0.496586	0.605653	0.5743	0.22686	0.194175	0.226308	0.605653		Electron transport	0.0048329	-1.37288
	Detoxification	0.434513	0.336474	0.358938	0.136116	0.0970874	0.169731	0.434513		Detoxification	0.0037807	-1.48761
	Transport	14.2148	15.6124	13.9268	5.98911	5.04854	3.84724	15.6124		Transport	0.000338208	-1.55556
	Antibiotic resistance	0.18622	0.269179	0.28715	0.0453721	0.0970874	0.0848656	0.28715		Antibiotic resistance	0.0165985	-1.70773
	Ion transport	9.37306	10.0269	9.83489	2.2686	1.5534	1.21641	10.0269		Ion transport	9.46792e-05	-2.53665
	Glycerol metabolism	0.124146	0.0672948	0.143575	0	0.0485437	0	0.143575		Glycerol metabolism	0.0319385	-2.78688
	Protein transport	0.310366	0.269179	0.215363	0	0	0.0848656	0.310366		Protein transport	0.00389583	-3.22754
	Translation regulation	1.67598	1.2786	1.36396	0.0907441	0.0485437	0.282885	1.67598		Translation regulation	0.00189429	-3.35464
	Peptide transport	0.18622	0.201884	0.215363	0	0	0.0565771	0.215363		Peptide transport	0.00417261	-3.41498
	DNA excision	0.248293	0.13459	0.28715	0	0	0.0565771	0.28715		DNA excision	0.0323599	-3.56594
	Conjugation	7.63501	7.60431	8.0402	0.589837	0.582524	0.452617	8.0402		Conjugation	0.000117272	-3.84057
	Porphyrin biosynthesis	0.620732	0.403769	0.789663	0.0453721	0.0485437	0.0282885	0.789663		Porphyrin biosynthesis	0.0366813	-3.89194
	Glucose metabolism	1.48976	1.48048	2.08184	0.0453721	0.194175	0.0848656	2.08184		Glucose metabolism	0.0123692	-3.96098
	DNA condensation	4.71757	5.1144	4.73798	0.317604	0.242718	0.282885	5.1144		DNA condensation	0.000590237	-4.11096
	Carbohydrate metabolism	2.73122	2.42261	3.4458	0.0453721	0.242718	0.169731	3.4458		Carbohydrate metabolism	0.010175	-4.23142
	Amino-acid transport	0.744879	0.740242	0.502513	0.0453721	0.0485437	0	0.744879		Amino-acid transport	0.0131443	-4.40354
	Tricarboxylic acid cycle	2.48293	1.68237	1.86648	0.0907441	0.0485437	0.0848656	2.48293		Tricarboxylic acid cycle	0.0150623	-4.75002
	GMP biosynthesis	0	0	0	0.544465	0.291262	0.254597	0.544465		GMP biosynthesis	0.0575004	-
	Aromatic amino acid biosynthesis	0.310366	0.336474	0.143575	0.0907441	0	0.0848656	0.336474		Aromatic amino acid biosynthesis	0.0580553	-2.17024
	Phosphotransferase system	1.55183	1.3459	1.22039	2.85844	2.42718	1.81047	2.85844		Phosphotransferase system	0.0709841	0.785041
	Phosphate transport	0.0620732	0.0672948	0.0717875	0	0.0485437	0	0.0717875		Phosphate transport	0.0839211	-2.05096
	Transcription	2.23464	2.01884	1.57933	3.67514	3.59223	2.31966	3.67514		Transcription	0.0872077	0.716894
	Transcription regulation	1.8622	1.61507	1.36396	2.94918	2.86408	1.89533	2.94918		Transcription regulation	0.0893456	0.671093
	tRNA processing	0.124146	0.0672948	0	0.136116	0.242718	0.141443	0.242718		tRNA processing	0.0930849	1.44238
	Asparagine biosynthesis	0	0	0	0.272232	0.145631	0.0848656	0.272232		Asparagine biosynthesis	0.093502	-
	Protein biosynthesis	1.92427	2.42261	2.36899	3.49365	4.12621	2.65912	4.12621		Protein biosynthesis	0.0937542	0.614052
	Gluconeogenesis	2.48293	2.75908	2.94329	3.72051	4.2233	3.05516	4.2233		Gluconeogenesis	0.0942811	0.426261
	Nucleotide biosynthesis	0.372439	0.269179	0.0717875	0.544465	0.339806	0.565771	0.565771		Nucleotide biosynthesis	0.100028	1.0233
	Septation	0.124146	0.0672948	0.143575	0.272232	0.436893	0.19802	0.436893		Septation	0.102567	1.4371
	Pyridoxine biosynthesis	0.0620732	0	0	0.362976	0.291262	0.0848656	0.362976		Pyridoxine biosynthesis	0.106062	3.57373
	SOS response	0.310366	0.13459	0.430725	0	0.0485437	0.169731	0.430725		SOS response	0.108962	-2.00426
	Competence	0.18622	0.538358	0.215363	0	0	0.0282885	0.538358		Competence	0.113645	-5.05428
	Transcription antitermination	0	0	0	0.0907441	0.242718	0.0848656	0.242718		Transcription antitermination	0.114234	-
	Aromatic hydrocarbons catabolism	0.0620732	0.269179	0.143575	0	0	0	0.269179		Aromatic hydrocarbons catabolism	0.11944	-
	One-carbon metabolism	0.18622	0.0672948	0.215363	0.0453721	0.0485437	0.0282885	0.215363		One-carbon metabolism	0.122732	-1.93991
	Capsule biogenesis/degradation	0	0	0	0.499093	0.533981	0.0848656	0.533981		Capsule biogenesis/degradation	0.122826	-
	Riboflavin biosynthesis	0.372439	0.538358	0.28715	0.181488	0.339806	0.113154	0.538358		Riboflavin biosynthesis	0.133372	-0.91699
	Nitrogen fixation	0.0620732	0.0672948	0.143575	0.0453721	0.0485437	0	0.143575		Nitrogen fixation	0.139393	-1.53916
	Tryptophan biosynthesis	0.0620732	0.13459	0.143575	0.0907441	0	0.0565771	0.143575		Tryptophan biosynthesis	0.156882	-1.20758
	Amino-acid biosynthesis	1.42768	1.21131	0.933238	2.2686	1.5534	1.41443	2.2686		Amino-acid biosynthesis	0.160072	0.551759
	DNA damage	0.372439	0.403769	0.789663	0.22686	0.194175	0.282885	0.789663		DNA damage	0.161308	-1.15348
	DNA repair	0.372439	0.403769	0.789663	0.22686	0.194175	0.282885	0.789663		DNA repair	0.161308	-1.15348
	ATP synthesis	0.124146	0	0.143575	0.362976	0.242718	0.113154	0.362976		ATP synthesis	0.165345	1.42496
	Sporulation	0.18622	0.269179	0.215363	0.22686	0.339806	0.367751	0.367751		Sporulation	0.169036	0.478267
	Chemotaxis	0.124146	0.269179	0.0717875	0.0907441	0	0.0282885	0.269179		Chemotaxis	0.180092	-1.96622
	Sodium transport	0	0	0	0.0453721	0.0485437	0	0.0485437		Sodium transport	0.183969	-
	Biotin biosynthesis	0	0	0	0.0453721	0.0485437	0	0.0485437		Biotin biosynthesis	0.183969	-
	Hydrogen ion transport	0.124146	0	0.143575	0.408348	0.242718	0.113154	0.408348		Hydrogen ion transport	0.184098	1.51326
	Tryptophan catabolism	0.124146	0	0.143575	0	0	0	0.143575		Tryptophan catabolism	0.185645	-
	Fatty acid metabolism	0.0620732	0	0.0717875	0	0	0	0.0717875		Fatty acid metabolism	0.185645	-
	Fatty acid biosynthesis	0.0620732	0	0.0717875	0	0	0	0.0717875		Fatty acid biosynthesis	0.185645	-
	Ascorbate biosynthesis	0.0620732	0	0.0717875	0	0	0	0.0717875		Ascorbate biosynthesis	0.185645	-
	Isoprene biosynthesis	0.0620732	0.201884	0.0717875	0	0.0485437	0.0282885	0.201884		Isoprene biosynthesis	0.188184	-2.12758
	Nucleotide metabolism	0	0	0	0.0453721	0	0.0282885	0.0453721		Nucleotide metabolism	0.204614	-
	Lipid A biosynthesis	0	0	0	0.0453721	0	0.0282885	0.0453721		Lipid A biosynthesis	0.204614	-
	Polysaccharide degradation	0.124146	0	0.0717875	0	0	0	0.124146		Polysaccharide degradation	0.211183	-
	Xylan degradation	0.124146	0	0.0717875	0	0	0	0.124146		Xylan degradation	0.211183	-
	Nickel insertion	0	0	0	0	0.0485437	0.0848656	0.0848656		Nickel insertion	0.21218	-
	Leucine biosynthesis	0	0	0.0717875	0.0453721	0.0970874	0.0565771	0.0970874		Leucine biosynthesis	0.22332	1.47123
	Rhamnose metabolism	0	0.0672948	0.143575	0	0	0	0.143575		Rhamnose metabolism	0.232196	-
	Two-component regulatory system	0.0620732	0	0.143575	0	0	0	0.143575		Two-component regulatory system	0.240942	-
	Cobalamin biosynthesis	0	0	0.0717875	0.0453721	0.0485437	0.141443	0.141443		Cobalamin biosynthesis	0.245038	1.71305
	Translocation	0.124146	0.0672948	0	0	0	0.0282885	0.124146		Translocation	0.265809	-2.75861
	Arginine metabolism	0	0	0	0.272232	0	0.0848656	0.272232		Arginine metabolism	0.276984	-
	Transcription termination	0.310366	0	0.0717875	0.272232	0.485437	0.141443	0.485437		Transcription termination	0.278042	1.23435
	Potassium transport	0	0.201884	0.0717875	0.0453721	0	0	0.201884		Potassium transport	0.325785	-2.59257
	Cell cycle	1.42768	0.874832	1.07681	0.998185	1.01942	0.763791	1.42768		Cell cycle	0.352314	-0.280929
	Cell division	1.42768	0.874832	1.07681	0.998185	1.01942	0.763791	1.42768		Cell division	0.352314	-0.280929
	Thiamine biosynthesis	0.558659	0.0672948	0	0	0	0.0565771	0.558659		Thiamine biosynthesis	0.393856	-3.46777
	Lipid metabolism	0.0620732	0	0.215363	0.0453721	0	0.0282885	0.215363		Lipid metabolism	0.400395	-1.91319
	Lipid biosynthesis	0.0620732	0	0.215363	0.0453721	0	0.0282885	0.215363		Lipid biosynthesis	0.400395	-1.91319
	Ribosome biogenesis	0.124146	0.0672948	0.0717875	0.136116	0.194175	0.0565771	0.194175		Ribosome biogenesis	0.421107	0.555524
	Pentose shunt	1.8622	1.48048	2.08184	1.90563	2.13592	1.92362	2.13592		Pentose shunt	0.421454	0.137068
	Methanogenesis	0.18622	0	0	0	0	0	0.18622		Methanogenesis	0.42265	-
	Phospholipid biosynthesis	0	0	0.143575	0	0	0	0.143575		Phospholipid biosynthesis	0.42265	-
	Phospholipid metabolism	0	0	0.143575	0	0	0	0.143575		Phospholipid metabolism	0.42265	-
	Antibiotic biosynthesis	0	0.13459	0	0	0	0	0.13459		Antibiotic biosynthesis	0.42265	-
	Folate biosynthesis	0	0	0	0	0	0.0848656	0.0848656		Folate biosynthesis	0.42265	-
	Chromosome partition	0	0	0.0717875	0	0	0	0.0717875		Chromosome partition	0.42265	-
	Cysteine biosynthesis	0	0	0.0717875	0	0	0	0.0717875		Cysteine biosynthesis	0.42265	-
	Antiviral defense	0	0	0.0717875	0	0	0	0.0717875		Antiviral defense	0.42265	-
	Heme biosynthesis	0	0	0.0717875	0	0	0	0.0717875		Heme biosynthesis	0.42265	-
	DNA integration	0	0.0672948	0	0	0	0	0.0672948		DNA integration	0.42265	-
	Histidine metabolism	0	0.0672948	0	0	0	0	0.0672948		Histidine metabolism	0.42265	-
	Threonine biosynthesis	0	0.0672948	0	0	0	0	0.0672948		Threonine biosynthesis	0.42265	-
	Transposition	0	0.0672948	0	0	0	0	0.0672948		Transposition	0.42265	-
	Glyoxylate bypass	0	0	0	0	0	0.0282885	0.0282885		Glyoxylate bypass	0.42265	-
	Glycogen metabolism	0	0	0	0	0	0.0282885	0.0282885		Glycogen metabolism	0.42265	-
	Lipid transport	0	0	0	0	0	0.0282885	0.0282885		Lipid transport	0.42265	-
	Catecholamine metabolism	0	0	0	0.0907441	0	0	0.0907441		Catecholamine metabolism	0.42265	-
	Queuosine biosynthesis	0	0	0	0.0453721	0	0	0.0453721		Queuosine biosynthesis	0.42265	-
	Cytochrome c-type biogenesis	0	0	0	0.0453721	0	0	0.0453721		Cytochrome c-type biogenesis	0.42265	-
	Enterobactin biosynthesis	0	0	0	0.0453721	0	0	0.0453721		Enterobactin biosynthesis	0.42265	-
	Teichoic acid biosynthesis	0	0	0	0.0453721	0	0	0.0453721		Teichoic acid biosynthesis	0.42265	-
	Coenzyme A biosynthesis	0	0.0672948	0.215363	0.0453721	0.0485437	0	0.215363		Coenzyme A biosynthesis	0.428702	-1.58961
	Arginine biosynthesis	0.18622	0.201884	0.143575	0.362976	0.339806	0.0848656	0.362976		Arginine biosynthesis	0.440392	0.566995
	Virulence	3.22781	1.41319	0	0.453721	0.0970874	21.2164	21.2164		Virulence	0.500197	2.22965
	Arabinose catabolism	0	0	0.143575	0	0	0.0282885	0.143575		Arabinose catabolism	0.508146	-2.34351
	Cell shape	0.869025	0.605653	0.717875	0.771325	0.873786	0.707214	0.873786		Cell shape	0.592837	0.101475
	Cell wall biogenesis/degradation	0.869025	0.605653	0.717875	0.771325	0.873786	0.707214	0.873786		Cell wall biogenesis/degradation	0.592837	0.101475
	DNA recombination	0	0.13459	0.28715	0.0453721	0.0485437	0.169731	0.28715		DNA recombination	0.60975	-0.677745
	Restriction system	0	0	0.0717875	0	0	0.0282885	0.0717875		Restriction system	0.617734	-1.34351
	Lipopolysaccharide biosynthesis	0.0620732	0	0	0	0	0.0282885	0.0620732		Lipopolysaccharide biosynthesis	0.656694	-1.13375
	Histidine biosynthesis	0.0620732	0.336474	0.0717875	0.0907441	0.145631	0.113154	0.336474		Histidine biosynthesis	0.699985	-0.428274
	Peptidoglycan synthesis	0.869025	0.605653	0.717875	0.725953	0.873786	0.707214	0.873786		Peptidoglycan synthesis	0.704458	0.0733766
	Molybdenum cofactor biosynthesis	0.0620732	0	0	0.0453721	0.0485437	0	0.0620732		Molybdenum cofactor biosynthesis	0.705037	0.597395
	Antiport	0.0620732	0.0672948	0	0.0907441	0	0	0.0907441		Antiport	0.748289	-0.511605
	Pyridine nucleotide biosynthesis	0	0.0672948	0	0.0453721	0.0485437	0	0.0672948		Pyridine nucleotide biosynthesis	0.763818	0.480873
	Proline biosynthesis	0	0	0.0717875	0.0453721	0	0	0.0717875		Proline biosynthesis	0.773989	-0.661929
	Iron storage	5.27623	5.78735	5.31228	1.27042	1.65049	10.7214	10.7214		Iron storage	0.795945	-0.263487
	Galactose metabolism	0	0.0672948	0	0	0.0485437	0	0.0672948		Galactose metabolism	0.833336	-0.47121
	Gluconate utilization	0.0620732	0	0.143575	0.0453721	0.0485437	0.0848656	0.143575		Gluconate utilization	0.853132	-0.201982
	Lysine biosynthesis	0.869025	0.269179	0.143575	0.453721	0.38835	0.565771	0.869025		Lysine biosynthesis	0.870284	0.135336
	DNA replication	0.0620732	0.336474	0.215363	0.272232	0.194175	0.169731	0.336474		DNA replication	0.936967	0.0513144
	TOTAL	100	100	100	100	100	100
