# Supplementary material for: Lignocellulose Fermentation Products Generated by Giant Panda Gut Microbiomes Depend Ultimately on pH Rather than Portion of Bamboo: A Preliminary Study
Source: Microorganisms. 2022 May 7;10(5):978. doi: 10.3390/microorganisms10050978 (PMC9146640; doi:10.3390/microorganisms10050978)
Supplement: Supplementary file 1 [file microorganisms-10-00978-s001.zip › Table S3 All Carbohydrate Active Enzymes.xlsx]

## Sheet: Table S3A
	Table S3A. Expression of metaproteins related to carbohydrate active enzymes (www.cazypedia.org) in in vitro incubation tests with microbiomes derived from giant panda gut samples (see Figure 1 for the experimental set up). The heat map red (low) to green (high) indicates increasing relative abundance.
						Inoculum	Standard			Standard			Dewatered				Effect of bamboo leaf addition			Effect of dewatering
						Added Substrate	Leaf			None			Leaf
						Label	Inoculum +Leaf			Inoculum			De-H2O Inoculum +Leaf				Inoculum +Leaf vs. Inoculum			De-H2O Inoculum +Leaf vs. Inoculum +Leaf
	Enzyme	Description	Taxonomy	KO	EC	Replicate	1	2	3	1	2	3	1	2	3		T-Test	log2 fold change		T-Test	log2 fold change
	Xylosidases	BXL4_ARATH Beta-D-xylosidase 4 OS=Arabidopsis thaliana GN=BXL4 PE=1 SV=1	Arabidopsis thaliana	K15920	3.2.1.37		0.0108372	0.00938394	0.0111575	0.0186497	0.00932662	0.00946786	0	0	0
		XYL2_MEDSV Beta-xylosidase/alpha-L-arabinofuranosidase 2 OS=Medicago sativa subsp. varia GN=Xyl2 PE=2 SV=1	Medicago sativa subsp. x varia	-	3.2.1.37 3.2.1.55		0.0270929	0.0281518	0.0223151	0.0279745	0.0186532	0.0284036	0	0	0
							0.0379301	0.0375358	0.0334726	0.0466242	0.0279799	0.0378714	0	0	0		0.849839	-0.0460965		0.00153569	-
	Arabin-	EMBB_MYCTU Probable arabinosyltransferase B OS=Mycobacterium tuberculosis (strain ATCC 25618 / H37Rv) GN=embB PE=1 SV=1	Mycobacterium tuberculosis H37Rv	K11386	2.4.2.-		0.00541859	0	0	0	0	0	0	0	0
							0.00541859	0	0	0	0	0	0	0	0		0.42265	-		0.42265	-
	Peroxidases	MG: Probable thiol peroxidase OS=Bacillus subtilis (strain 168) GN=tpx PE=1 SV=3 [P80864] Score: 189.0	Bacillus subtilis subsp. subtilis str. 168	K11065	1.11.1.-		0	0	0	0	0	0	0.00497934	0.00315507	0.0043262
		TPX_ECOLI Thiol peroxidase OS=Escherichia coli (strain K12) GN=tpx PE=1 SV=2	Escherichia coli	K11065	1.11.1.-		0.0108372	0.0187679	0	0.00932484	0.0279799	0.0284036	0.00497934	0.0126203	0.00865239
		YFEX_ECOLI Probable deferrochelatase/peroxidase YfeX OS=Escherichia coli (strain K12) GN=yfeX PE=1 SV=2	Escherichia coli K-12	K07223	1.11.1.-		0	0.00469197	0	0	0	0	0.00497934	0	0
		TPX_YERPE Probable thiol peroxidase OS=Yersinia pestis GN=tpx PE=3 SV=1	Enterobacteriaceae	K11065	1.11.1.-		0.00541859	0.00938394	0	0.00466242	0.00932662	0.00946786	0	0	0.0043262
		KATG_SHISS Catalase-peroxidase OS=Shigella sonnei (strain Ss046) GN=katG PE=3 SV=1	Enterobacteriaceae	K03782	1.11.1.21		0	0.00938394	0	0.0279745	0.0233165	0.0189357	0.0348554	0.0157754	0.0259572
		PER_GINBI Peroxidase (Fragments) OS=Ginkgo biloba PE=1 SV=1	Ginkgo biloba	-	1.11.1.7		0	0	0	0	0.00466331	0	0	0	0
		PERX_WHEAT Peroxidase (Fragment) OS=Triticum aestivum PE=2 SV=1	Poaceae	-	1.11.1.7		0.00541859	0.00469197	0	0	0	0	0	0	0
		PER40_ARATH Peroxidase 40 OS=Arabidopsis thaliana GN=PER40 PE=2 SV=2	Arabidopsis thaliana	K00430	1.11.1.7		0.0108372	0.00469197	0	0.00466242	0.00932662	0.00946786	0	0	0
		PERP7_BRARR Peroxidase P7 OS=Brassica rapa subsp. rapa PE=1 SV=3	Brassicaceae	-	1.11.1.7		0.0162558	0.0140759	0	0.00932484	0.0139899	0.0142018	0	0	0
		PERA2_ARMRU Peroxidase A2 OS=Armoracia rusticana GN=HRPA2 PE=1 SV=1	Brassicaceae	K00430	1.11.1.7		0.00541859	0.00938394	0	0	0.00466331	0	0	0	0
		PERX_SOLTU Suberization-associated anionic peroxidase OS=Solanum tuberosum PE=2 SV=2	Solanales	-	1.11.1.7		0.0162558	0.0140759	0	0.00932484	0.0139899	0.0142018	0	0	0
		PER1_MAIZE Peroxidase 1 OS=Zea mays GN=PER1 PE=1 SV=1	Streptophyta	K00430	1.11.1.7		0.0325115	0.0234599	0.0111575	0.0279745	0.0233165	0.0189357	0	0	0.0043262
		PER66_MAIZE Peroxidase 66 OS=Zea mays GN=PER66 PE=1 SV=1	Streptophyta	K00430	1.11.1.7		0.0704416	0.0750716	0.00557877	0.055949	0.0559597	0.0568072	0	0	0.0043262
		PER22_ARATH Peroxidase 22 OS=Arabidopsis thaliana GN=PER22 PE=1 SV=2	Streptophyta	-	1.11.1.7		0.0162558	0.00938394	0.00557877	0.0186497	0.00932662	0.00946786	0	0	0.0043262
							0.189651	0.197063	0.0223151	0.167847	0.195859	0.179889	0.0497934	0.0315507	0.0562405		0.515062	-0.410332		0.252453	-1.57188
	Carbohydrate deacetylase	YDJC_VIBC3 Carbohydrate deacetylase OS=Vibrio cholerae serotype O1 (strain ATCC 39541 / Classical Ogawa 395 / O395) GN=VC0395_A0904 PE=3 SV=1	root	K03478	3.5.1.-		0	0.00469197	0	0.00466242	0	0.00946786	0	0	0
							0	0.00469197	0	0.00466242	0	0.00946786	0	0	0		0.387543	-1.59052		0.42265	-
	Phosphorylases	PHSL_VICFA Alpha-1,4 glucan phosphorylase L isozyme, chloroplastic/amyloplastic OS=Vicia faba GN=PHO1 PE=2 SV=2	Vicia faba	-	2.4.1.1		0	0	0	0	0	0	0	0	0
		TREP_THEBR Alpha,alpha-trehalose phosphorylase OS=Thermoanaerobacter brockii GN=treP PE=1 SV=1	Thermoanaerobacter brockii	-	2.4.1.64		0	0	0.00557877	0	0	0	0	0	0
		MG: Maltose phosphorylase OS=Bacillus subtilis (strain 168) GN=mdxK PE=3 SV=1 [O06993] Score: 545.0	Bacilli	K00691	2.4.1.8		0	0	0	0	0	0	0	0	0
		USP_ORYSI UDP-sugar pyrophosphorylase OS=Oryza sativa subsp. indica GN=USP PE=3 SV=2	Oryza sativa Indica Group	-	2.7.7.64		0	0	0	0	0	0	0	0	0
							0	0	0.00557877	0	0	0	0	0	0		0.42265	-		0.42265	-
	Beta glucosidases	MG: Beta-glucosidase OS=Ruminococcus albus PE=3 SV=1 [P15885] Score: 880.0	Ruminococcus albus	-	3.2.1.21		0	0	0	0	0	0	0	0	0
		BGLA_THEMA Beta-glucosidase A OS=Thermotoga maritima (strain ATCC 43589 / MSB8 / DSM 3109 / JCM 10099) GN=bglA PE=1 SV=1	Thermotoga maritima MSB8	K05350	3.2.1.21		0	0	0	0	0	0	0	0	0.0043262
		BGLA_ASPFN Probable beta-glucosidase A OS=Aspergillus flavus (strain ATCC 200026 / FGSC A1120 / NRRL 3357 / JCM 12722 / SRRC 167) GN=bglA PE=3 SV=1	Aspergillus flavus NRRL3357	K05349	3.2.1.21		0	0	0	0	0	0	0	0	0
		GBA3_PONAB Cytosolic beta-glucosidase OS=Pongo abelii GN=GBA3 PE=2 SV=1	Hominidae	K05350	3.2.1.21		0	0	0	0	0	0	0.00497934	0	0
		E13E_HORVU Glucan endo-1,3-beta-glucosidase GV OS=Hordeum vulgare PE=2 SV=2	Hordeum vulgare	-	3.2.1.39		0.00541859	0.00469197	0	0.00466242	0	0	0	0	0
		E13B_HORVU Glucan endo-1,3-beta-glucosidase GII OS=Hordeum vulgare PE=1 SV=1	Hordeum vulgare	-	3.2.1.39		0.00541859	0.00469197	0	0	0	0	0	0	0
		MG: Aryl-phospho-beta-D-glucosidase BglH OS=Bacillus subtilis (strain 168) GN=bglH PE=1 SV=2 [P40740] Score: 491.0	Bacillus subtilis subsp. subtilis str. 168	K01223	3.2.1.86		0	0	0	0	0	0	0.00497934	0.00315507	0.0043262
		MG: 6-phospho-beta-glucosidase BglA OS=Escherichia coli (strain K12) GN=bglA PE=1 SV=2 [Q46829] Score: 553.0	Bacteria	K01223	3.2.1.86		0	0	0	0	0	0	0	0.00315507	0
							0.0108372	0.00938394	0	0.00466242	0	0	0.00995867	0.00631014	0.00865239		0.265043	2.11671		0.696523	0.301511
	Beta galactosidases	BGAL_THETH Beta-galactosidase OS=Thermus thermophilus PE=1 SV=1	Thermus	-	3.2.1.23		0	0	0	0	0	0	0	0	0
		BGAL_GEOKU Beta-galactosidase bgaB OS=Geobacillus kaustophilus GN=bgaB PE=1 SV=1	Geobacillus kaustophilus	-	3.2.1.23		0	0	0	0	0	0.00473393	0	0	0
		BGA14_ARATH Beta-galactosidase 14 OS=Arabidopsis thaliana GN=BGAL14 PE=2 SV=2	Arabidopsis thaliana	-	3.2.1.23		0	0.00938394	0	0	0	0	0.00995867	0	0.00865239
		BGAL6_ARATH Beta-galactosidase 6 OS=Arabidopsis thaliana GN=BGAL6 PE=2 SV=1	root	-	3.2.1.23		0.0108372	0.0140759	0.00557877	0.0139873	0.00932662	0.0189357	0	0	0
		BGAL8_ARATH Beta-galactosidase 8 OS=Arabidopsis thaliana GN=BGAL8 PE=2 SV=2	root	-	3.2.1.23		0.0108372	0.0140759	0.00557877	0.0139873	0.00932662	0.0189357	0	0	0
							0.0216743	0.0375358	0.0111575	0.0279745	0.0186532	0.0426054	0.00995867	0	0.00865239		0.576967	-0.342667		0.140569	-1.91875
	Arabinofuranosidases	ARBA_CELJU Extracellular exo-alpha-(1->5)-L-arabinofuranosidase ArbA OS=Cellvibrio japonicus (strain Ueda107) GN=arbA PE=1 SV=1	Cellvibrio japonicus Ueda107	-	3.2.1.-		0	0	0	0	0	0.00473393	0	0	0
		XYL2_MEDSV Beta-xylosidase/alpha-L-arabinofuranosidase 2 OS=Medicago sativa subsp. varia GN=Xyl2 PE=2 SV=1	Medicago sativa subsp. x varia	-	3.2.1.37 3.2.1.55		0.0270929	0.0281518	0.0223151	0.0279745	0.0186532	0.0284036	0	0	0
							0.0270929	0.0281518	0.0223151	0.0279745	0.0186532	0.0331375	0	0	0		0.884311	-0.0404505		0.00478765	-
	Reducing-end xylose-releasing exo-oligoxylanase	REOX_BACHD Reducing end xylose-releasing exo-oligoxylanase OS=Bacillus halodurans (strain ATCC BAA-125 / DSM 18197 / FERM 7344 / JCM 9153 / C-125) GN=BH2105 PE=1 SV=1	Bacillus halodurans C-125	K15531	3.2.1.156		0	0	0	0.00932484	0	0.00473393	0	0	0
							0	0	0	0.00932484	0	0.00473393	0	0	0		0.223839	-		-	-
	Alpha amylases	AMY_PSEHA Alpha-amylase OS=Pseudoalteromonas haloplanktis GN=amy PE=1 SV=3	Pseudoalteromonas haloplanktis	-	3.2.1.1		0	0	0	0	0	0	0	0	0
		AMY_TENMO Alpha-amylase OS=Tenebrio molitor PE=1 SV=1	Tenebrio molitor	-	3.2.1.1		0	0.00938394	0	0	0.00466331	0	0.0846487	0.044171	0.0259572
		G1L4F3_AILME Alpha-amylase OS=Ailuropoda melanoleuca PE=3 SV=1	Chordata	-	3.2.1.1		32.2731	29.5641	31.2578	31.2941	33.0302	32.5268	36.8023	37.7567	38.4382
		AMY1_DROAN Alpha-amylase 1 OS=Drosophila ananassae GN=Amy35 PE=3 SV=3	Metazoa	K01176	3.2.1.1		0.0216743	0.0375358	0.0223151	0.0326369	0.0186532	0.0331375	0.194194	0.135668	0.155743
		AMYP_RAT Pancreatic alpha-amylase OS=Rattus norvegicus GN=Amy2 PE=2 SV=2	Metazoa	-	3.2.1.1		12.3598	10.6132	13.601	11.0359	12.078	12.0763	14.704	15.0497	14.7653
		AMY2B_HUMAN Alpha-amylase 2B OS=Homo sapiens GN=AMY2B PE=1 SV=1	Metazoa	K01176	3.2.1.1		12.3164	10.5522	13.5118	10.8867	11.9614	12.0384	14.6542	15.0592	14.6874
		AMYM_BACAD Maltogenic alpha-amylase OS=Bacillus acidopullulyticus PE=3 SV=1	Bacillus acidopullulyticus	-	3.2.1.133		0	0.00469197	0.00557877	0.00466242	0.00932662	0.00473393	0.014938	0.00631014	0.0043262
							56.971	50.7812	58.3986	53.2541	57.1022	56.6793	66.4542	68.0517	68.077		0.917951	-0.00766332		0.0298789	0.28602
	Beta amylases	AMYB_SECCE Beta-amylase (Fragment) OS=Secale cereale GN=BMY1 PE=2 SV=1	Poaceae	-	3.2.1.2		0.00541859	0.00938394	0.00557877	0.00466242	0.00932662	0.00946786	0	0	0
		AMYB_HORVS Beta-amylase OS=Hordeum vulgare subsp. spontaneum GN=BMY1 PE=1 SV=1	Poaceae	-	3.2.1.2		0.0162558	0.0234599	0.0223151	0.0233121	0.0233165	0.0236696	0	0	0
		MGAL_HUMAN Probable maltase-glucoamylase 2 OS=Homo sapiens GN=MGAM2 PE=2 SV=3	Mammalia	-	-		0.0433487	0.0891475	0.105997	0.0512866	0.0512964	0.0710089	0	0	0
							0.065023	0.121991	0.13389	0.0792611	0.0839396	0.104146	0	0	0		0.497086	0.263431		0.037279	-
	Branching enzymes	GLGB_CHESB 1,4-alpha-glucan branching enzyme GlgB OS=Chelativorans sp. (strain BNC1) GN=glgB PE=3 SV=1	Proteobacteria	K00700	2.4.1.18		0	0	0	0	0	0	0	0	0
							0	0	0	0	0	0	0	0	0		-	-		-	-
	Lysozimes	MG: Lysozyme M1 OS=Streptomyces globisporus GN=acm PE=1 SV=1 [P25310] Score: 72.4	Streptomyces globisporus	-	3.2.1.17		0	0	0	0	0	0	0.00497934	0.00315507	0.0043262
		MG: Probable autolytic lysozyme OS=Clostridium perfringens (strain 13 / Type A) GN=lyc PE=3 SV=2 [P26836] Score: 204.0	Clostridium perfringens str. 13	K07273	3.2.1.17		0	0.00469197	0.00557877	0.00466242	0	0	0	0	0.0043262
		LYSC_SYRSO Lysozyme C OS=Syrmaticus soemmerringii GN=LYZ PE=1 SV=1	Syrmaticus soemmerringii	-	3.2.1.17		0	0	0.00557877	0	0	0	0	0	0
		LYSC_PHOVI Lysozyme C OS=Phoca vitulina GN=LYZ PE=2 SV=1	Chordata	K13915	3.2.1.17		0	0	0.00557877	0	0	0	0	0	0
							0	0.00469197	0.0167363	0.00466242	0	0	0.00497934	0.00315507	0.00865239		0.380661	2.20037		0.791285	-0.352189
	Lactalbumin	LALBA_RAT Alpha-lactalbumin OS=Rattus norvegicus GN=Lalba PE=1 SV=1	Rattus norvegicus	K00704	-		0	0	0	0	0	0	0.00497934	0	0
							0	0	0	0	0	0	0.00497934	0	0		-	-		-	-
	Peptidoglycan transglycosylases	MTGA_CYTH3 Monofunctional biosynthetic peptidoglycan transglycosylase OS=Cytophaga hutchinsonii (strain ATCC 33406 / NCIMB 9469) GN=mtgA PE=3 SV=1	Cytophaga hutchinsonii ATCC 33406	K03814	2.4.2.-		0.00541859	0	0	0	0	0	0	0	0
							0.00541859	0	0	0	0	0	0	0	0		-	-		-	-
	Alpha mannosidases	G1M054_AILME Alpha-mannosidase OS=Ailuropoda melanoleuca GN=MAN2B1 PE=3 SV=1	Ailuropoda melanoleuca	-	3.2.1.-		0.0108372	0.0375358	0.00557877	0.0466242	0.0233165	0.0331375	0	0	0
		MANA_CANEN Alpha-mannosidase OS=Canavalia ensiformis PE=1 SV=1	Canavalia ensiformis	-	3.2.1.24		0	0	0	0	0	0	0.00497934	0	0
							0.0108372	0.0375358	0.00557877	0.0466242	0.0233165	0.0331375	0.00497934	0	0		0.252168	-0.933999		0.238612	-3.43764
	Transglycosylases	MTGA_CYTH3 Monofunctional biosynthetic peptidoglycan transglycosylase OS=Cytophaga hutchinsonii (strain ATCC 33406 / NCIMB 9469) GN=mtgA PE=3 SV=1	Cytophaga hutchinsonii ATCC 33406	K03814	2.4.2.-		0.00541859	0	0	0	0	0	0	0	0
							0.00541859	0	0	0	0	0	0	0	0		0.42265	-		0.42265	-
	Hexosaminidases	STRH_STRPN Beta-N-acetylhexosaminidase OS=Streptococcus pneumoniae serotype 4 (strain ATCC BAA-334 / TIGR4) GN=strH PE=1 SV=2	Streptococcus pneumoniae TIGR4	K12373	3.2.1.52		0	0	0	0	0	0	0	0	0
							0	0	0	0	0	0	0	0	0		-	-		-	-
	Epimerases	YEAD_ECOLI Putative glucose-6-phosphate 1-epimerase OS=Escherichia coli (strain K12) GN=yeaD PE=1 SV=2	Escherichia coli K-12	K01792	5.1.3.15		0	0.00469197	0	0	0.00466331	0	0.00995867	0.00315507	0.0129786
		MG: UDP-glucose 4-epimerase OS=Bacillus subtilis (strain 168) GN=galE PE=3 SV=1 [P55180] Score: 475.0	Bacillus subtilis subsp. subtilis str. 168	K01784	5.1.3.2		0	0	0	0	0	0	0.00497934	0	0
		GALE_ECOLI UDP-glucose 4-epimerase OS=Escherichia coli (strain K12) GN=galE PE=1 SV=1	Escherichia coli K-12	K01784	5.1.3.2		0	0	0	0	0.00466331	0	0	0.00315507	0.00865239
		HLDD_AERS4 ADP-L-glycero-D-manno-heptose-6-epimerase OS=Aeromonas salmonicida (strain A449) GN=hldD PE=3 SV=1	Aeromonas	K03274	5.1.3.20		0	0	0	0	0	0	0.00497934	0	0.0129786
		HLDD_SALTY ADP-L-glycero-D-manno-heptose-6-epimerase OS=Salmonella typhimurium (strain LT2 / SGSC1412 / ATCC 700720) GN=hldD PE=3 SV=1	Gammaproteobacteria	K03274	5.1.3.20		0	0	0	0	0	0	0.00995867	0	0.0173048
		HLDD_BURXL ADP-L-glycero-D-manno-heptose-6-epimerase OS=Burkholderia xenovorans (strain LB400) GN=hldD PE=3 SV=1	Proteobacteria	K03274	5.1.3.20		0	0	0	0	0	0	0	0	0.0043262
		NANE_STAAN Putative N-acetylmannosamine-6-phosphate 2-epimerase OS=Staphylococcus aureus (strain N315) GN=nanE PE=1 SV=1	Staphylococcus aureus subsp. aureus	K01788	5.1.3.9		0.00541859	0.0140759	0	0.00466242	0	0.00473393	0	0	0
		NANE_STACT Putative N-acetylmannosamine-6-phosphate 2-epimerase OS=Staphylococcus carnosus (strain TM300) GN=nanE PE=3 SV=1	Staphylococcus carnosus subsp. carnosus TM300	K01788	5.1.3.9		0	0.00469197	0.00557877	0.00466242	0.00466331	0	0	0	0
							0.00541859	0.0234599	0.00557877	0.00932484	0.0139899	0.00473393	0.029876	0.00631014	0.0562405		0.767636	0.296873		0.313608	1.4235
	Cellobiose-related enzymes	MG: Cellobiose-specific phosphotransferase enzyme IIB component OS=Geobacillus stearothermophilus GN=celA PE=3 SV=1 [Q45399] Score: 99.4	Geobacillus stearothermophilus	-	2.7.1.205		0	0	0	0	0	0	0	0	0.0043262
							0	0	0	0	0	0	0	0	0.0043262		-	-		0.42265	-

## Sheet: Table S3B
	Table S3B. Expression of metaproteins related to carbohydrate active enzymes (www.cazypedia.org) in in vitro incubation tests with microbiomes derived from giant panda gut samples (see Figure 1 for the experimental set up). The values for Inoculum +Leaf (pH 6.5) are the same as Inoculum +Leaf in Table S2A, and are reported here for convenience of comparison. The heat map red (low) to green (high)…
						Inoculum	Standard			Standard				Effect of pH decrease
						Added Substrate	Leaf			Leaf
						Label	Inoculum +Leaf (pH 6.5)			Inoculum +Leaf (pH 4.5)				Inoculum +Leaf (pH 4.5) vs. Inoculum +Leaf (pH 6.5)
	Enzyme	Description	Taxonomy	KO	EC	Replicate	1	2	3	1	2	3		T-Test	log2 fold change
	Xylosidases	BXL4_ARATH Beta-D-xylosidase 4 OS=Arabidopsis thaliana GN=BXL4 PE=1 SV=1	Arabidopsis thaliana	K15920	3.2.1.37		0.0108372	0.00938394	0.0111575	0	0	0
		XYL2_MEDSV Beta-xylosidase/alpha-L-arabinofuranosidase 2 OS=Medicago sativa subsp. varia GN=Xyl2 PE=2 SV=1	Medicago sativa subsp. x varia	-	3.2.1.37 3.2.1.55		0.0270929	0.0281518	0.0223151	0	0	0
							0.0379301	0.0375358	0.0334726	0	0	0		0.00153569	-
	Arabin-	EMBB_MYCTU Probable arabinosyltransferase B OS=Mycobacterium tuberculosis (strain ATCC 25618 / H37Rv) GN=embB PE=1 SV=1	Mycobacterium tuberculosis H37Rv	K11386	2.4.2.-		0.00541859	0	0	0	0.00365631	0
							0.00541859	0	0	0	0.00365631	0		0.80257	-0.567529
	Peroxidases	MG: Probable thiol peroxidase OS=Bacillus subtilis (strain 168) GN=tpx PE=1 SV=3 [P80864] Score: 189.0	Bacillus subtilis subsp. subtilis str. 168	K11065	1.11.1.-		0	0	0	0.0036735	0.00365631	0.0038276
		TPX_ECOLI Thiol peroxidase OS=Escherichia coli (strain K12) GN=tpx PE=1 SV=2	Escherichia coli	K11065	1.11.1.-		0.0108372	0.0187679	0	0.0036735	0	0
		YFEX_ECOLI Probable deferrochelatase/peroxidase YfeX OS=Escherichia coli (strain K12) GN=yfeX PE=1 SV=2	Escherichia coli K-12	K07223	1.11.1.-		0	0.00469197	0	0	0	0
		TPX_YERPE Probable thiol peroxidase OS=Yersinia pestis GN=tpx PE=3 SV=1	Enterobacteriaceae	K11065	1.11.1.-		0.00541859	0.00938394	0	0	0	0
		KATG_SHISS Catalase-peroxidase OS=Shigella sonnei (strain Ss046) GN=katG PE=3 SV=1	Enterobacteriaceae	K03782	1.11.1.21		0	0.00938394	0	0.007347	0.00365631	0
		PER_GINBI Peroxidase (Fragments) OS=Ginkgo biloba PE=1 SV=1	Ginkgo biloba	-	1.11.1.7		0	0	0	0	0	0
		PERX_WHEAT Peroxidase (Fragment) OS=Triticum aestivum PE=2 SV=1	Poaceae	-	1.11.1.7		0.00541859	0.00469197	0	0	0	0
		PER40_ARATH Peroxidase 40 OS=Arabidopsis thaliana GN=PER40 PE=2 SV=2	Arabidopsis thaliana	K00430	1.11.1.7		0.0108372	0.00469197	0	0	0	0
		PERP7_BRARR Peroxidase P7 OS=Brassica rapa subsp. rapa PE=1 SV=3	Brassicaceae	-	1.11.1.7		0.0162558	0.0140759	0	0	0	0
		PERA2_ARMRU Peroxidase A2 OS=Armoracia rusticana GN=HRPA2 PE=1 SV=1	Brassicaceae	K00430	1.11.1.7		0.00541859	0.00938394	0	0	0	0
		PERX_SOLTU Suberization-associated anionic peroxidase OS=Solanum tuberosum PE=2 SV=2	Solanales	-	1.11.1.7		0.0162558	0.0140759	0	0	0	0
		PER1_MAIZE Peroxidase 1 OS=Zea mays GN=PER1 PE=1 SV=1	Streptophyta	K00430	1.11.1.7		0.0325115	0.0234599	0.0111575	0.007347	0.00731261	0
		PER66_MAIZE Peroxidase 66 OS=Zea mays GN=PER66 PE=1 SV=1	Streptophyta	K00430	1.11.1.7		0.0704416	0.0750716	0.00557877	0.007347	0.00731261	0
		PER22_ARATH Peroxidase 22 OS=Arabidopsis thaliana GN=PER22 PE=1 SV=2	Streptophyta	-	1.11.1.7		0.0162558	0.00938394	0.00557877	0.007347	0.00731261	0
							0.189651	0.197063	0.0223151	0.036735	0.0292505	0.0038276		0.182791	-2.55063
	Carbohydrate deacetylase	YDJC_VIBC3 Carbohydrate deacetylase OS=Vibrio cholerae serotype O1 (strain ATCC 39541 / Classical Ogawa 395 / O395) GN=VC0395_A0904 PE=3 SV=1	root	K03478	3.5.1.-		0	0.00469197	0	0	0	0
							0	0.00469197	0	0	0	0		0.42265	-
	Phosphorylases	PHSL_VICFA Alpha-1,4 glucan phosphorylase L isozyme, chloroplastic/amyloplastic OS=Vicia faba GN=PHO1 PE=2 SV=2	Vicia faba	-	2.4.1.1		0	0	0	0	0	0
		TREP_THEBR Alpha,alpha-trehalose phosphorylase OS=Thermoanaerobacter brockii GN=treP PE=1 SV=1	Thermoanaerobacter brockii	-	2.4.1.64		0	0	0.00557877	0	0	0
		MG: Maltose phosphorylase OS=Bacillus subtilis (strain 168) GN=mdxK PE=3 SV=1 [O06993] Score: 545.0	Bacilli	K00691	2.4.1.8		0	0	0	0	0	0
		USP_ORYSI UDP-sugar pyrophosphorylase OS=Oryza sativa subsp. indica GN=USP PE=3 SV=2	Oryza sativa Indica Group	-	2.7.7.64		0	0	0	0	0	0
							0	0	0.00557877	0	0	0		0.42265	-
	Beta glucosidases	MG: Beta-glucosidase OS=Ruminococcus albus PE=3 SV=1 [P15885] Score: 880.0	Ruminococcus albus	-	3.2.1.21		0	0	0	0	0	0
		BGLA_THEMA Beta-glucosidase A OS=Thermotoga maritima (strain ATCC 43589 / MSB8 / DSM 3109 / JCM 10099) GN=bglA PE=1 SV=1	Thermotoga maritima MSB8	K05350	3.2.1.21		0	0	0	0	0	0
		BGLA_ASPFN Probable beta-glucosidase A OS=Aspergillus flavus (strain ATCC 200026 / FGSC A1120 / NRRL 3357 / JCM 12722 / SRRC 167) GN=bglA PE=3 SV=1	Aspergillus flavus NRRL3357	K05349	3.2.1.21		0	0	0	0	0	0
		GBA3_PONAB Cytosolic beta-glucosidase OS=Pongo abelii GN=GBA3 PE=2 SV=1	Hominidae	K05350	3.2.1.21		0	0	0	0.0036735	0	0
		E13E_HORVU Glucan endo-1,3-beta-glucosidase GV OS=Hordeum vulgare PE=2 SV=2	Hordeum vulgare	-	3.2.1.39		0.00541859	0.00469197	0	0	0	0
		E13B_HORVU Glucan endo-1,3-beta-glucosidase GII OS=Hordeum vulgare PE=1 SV=1	Hordeum vulgare	-	3.2.1.39		0.00541859	0.00469197	0	0	0	0
		MG: Aryl-phospho-beta-D-glucosidase BglH OS=Bacillus subtilis (strain 168) GN=bglH PE=1 SV=2 [P40740] Score: 491.0	Bacillus subtilis subsp. subtilis str. 168	K01223	3.2.1.86		0	0	0	0.0036735	0.00365631	0
		MG: 6-phospho-beta-glucosidase BglA OS=Escherichia coli (strain K12) GN=bglA PE=1 SV=2 [Q46829] Score: 553.0	Bacteria	K01223	3.2.1.86		0	0	0	0.0036735	0.00365631	0.0038276
							0.0108372	0.00938394	0	0.0110205	0.00731261	0.0038276		0.880393	0.132142
	Beta galactosidases	BGAL_THETH Beta-galactosidase OS=Thermus thermophilus PE=1 SV=1	Thermus	-	3.2.1.23		0	0	0	0.0036735	0.00365631	0
		BGAL_GEOKU Beta-galactosidase bgaB OS=Geobacillus kaustophilus GN=bgaB PE=1 SV=1	Geobacillus kaustophilus	-	3.2.1.23		0	0	0	0	0	0
		BGA14_ARATH Beta-galactosidase 14 OS=Arabidopsis thaliana GN=BGAL14 PE=2 SV=2	Arabidopsis thaliana	-	3.2.1.23		0	0.00938394	0	0	0.00365631	0
		BGAL6_ARATH Beta-galactosidase 6 OS=Arabidopsis thaliana GN=BGAL6 PE=2 SV=1	root	-	3.2.1.23		0.0108372	0.0140759	0.00557877	0	0	0
		BGAL8_ARATH Beta-galactosidase 8 OS=Arabidopsis thaliana GN=BGAL8 PE=2 SV=2	root	-	3.2.1.23		0.0108372	0.0140759	0.00557877	0	0	0
							0.0216743	0.0375358	0.0111575	0.0036735	0.00731261	0		0.114155	-2.67923
	Arabinofuranosidases	ARBA_CELJU Extracellular exo-alpha-(1->5)-L-arabinofuranosidase ArbA OS=Cellvibrio japonicus (strain Ueda107) GN=arbA PE=1 SV=1	Cellvibrio japonicus Ueda107	-	3.2.1.-		0	0	0	0	0	0
		XYL2_MEDSV Beta-xylosidase/alpha-L-arabinofuranosidase 2 OS=Medicago sativa subsp. varia GN=Xyl2 PE=2 SV=1	Medicago sativa subsp. x varia	-	3.2.1.37 3.2.1.55		0.0270929	0.0281518	0.0223151	0	0	0
							0.0270929	0.0281518	0.0223151	0	0	0		0.00478765	-
	Reducing-end xylose-releasing exo-oligoxylanase	REOX_BACHD Reducing end xylose-releasing exo-oligoxylanase OS=Bacillus halodurans (strain ATCC BAA-125 / DSM 18197 / FERM 7344 / JCM 9153 / C-125) GN=BH2105 PE=1 SV=1	Bacillus halodurans C-125	K15531	3.2.1.156		0	0	0	0	0	0
							0	0	0	0	0	0		-	-
	Alpha amylases	AMY_PSEHA Alpha-amylase OS=Pseudoalteromonas haloplanktis GN=amy PE=1 SV=3	Pseudoalteromonas haloplanktis	-	3.2.1.1		0	0	0	0.0036735	0	0
		AMY_TENMO Alpha-amylase OS=Tenebrio molitor PE=1 SV=1	Tenebrio molitor	-	3.2.1.1		0	0.00938394	0	0.128572	0.0402194	0.0306208
		G1L4F3_AILME Alpha-amylase OS=Ailuropoda melanoleuca PE=3 SV=1	Chordata	-	3.2.1.1		32.2731	29.5641	31.2578	42.0322	39.2285	45.7207
		AMY1_DROAN Alpha-amylase 1 OS=Drosophila ananassae GN=Amy35 PE=3 SV=3	Metazoa	K01176	3.2.1.1		0.0216743	0.0375358	0.0223151	0.154287	0.146252	0.168415
		AMYP_RAT Pancreatic alpha-amylase OS=Rattus norvegicus GN=Amy2 PE=2 SV=2	Metazoa	-	3.2.1.1		12.3598	10.6132	13.601	17.0267	16.4059	14.9851
		AMY2B_HUMAN Alpha-amylase 2B OS=Homo sapiens GN=AMY2B PE=1 SV=1	Metazoa	K01176	3.2.1.1		12.3164	10.5522	13.5118	16.8724	16.2779	14.9277
		AMYM_BACAD Maltogenic alpha-amylase OS=Bacillus acidopullulyticus PE=3 SV=1	Bacillus acidopullulyticus	-	3.2.1.133		0	0.00469197	0.00557877	0.0404085	0.0255941	0.00765521
							56.971	50.7812	58.3986	76.2582	72.1243	75.8402		0.00465353	0.432439
	Beta amylases	AMYB_SECCE Beta-amylase (Fragment) OS=Secale cereale GN=BMY1 PE=2 SV=1	Poaceae	-	3.2.1.2		0.00541859	0.00938394	0.00557877	0	0	0
		AMYB_HORVS Beta-amylase OS=Hordeum vulgare subsp. spontaneum GN=BMY1 PE=1 SV=1	Poaceae	-	3.2.1.2		0.0162558	0.0234599	0.0223151	0	0	0
		MGAL_HUMAN Probable maltase-glucoamylase 2 OS=Homo sapiens GN=MGAM2 PE=2 SV=3	Mammalia	-	-		0.0433487	0.0891475	0.105997	0	0	0
							0.065023	0.121991	0.13389	0	0	0		0.037279	-
	Branching enzymes	GLGB_CHESB 1,4-alpha-glucan branching enzyme GlgB OS=Chelativorans sp. (strain BNC1) GN=glgB PE=3 SV=1	Proteobacteria	K00700	2.4.1.18		0	0	0	0.007347	0	0
							0	0	0	0.007347	0	0		0.42265	-
	Lysozimes	MG: Lysozyme M1 OS=Streptomyces globisporus GN=acm PE=1 SV=1 [P25310] Score: 72.4	Streptomyces globisporus	-	3.2.1.17		0	0	0	0.0036735	0.00365631	0.0038276
		MG: Probable autolytic lysozyme OS=Clostridium perfringens (strain 13 / Type A) GN=lyc PE=3 SV=2 [P26836] Score: 204.0	Clostridium perfringens str. 13	K07273	3.2.1.17		0	0.00469197	0.00557877	0.0036735	0.00365631	0.0038276
		LYSC_SYRSO Lysozyme C OS=Syrmaticus soemmerringii GN=LYZ PE=1 SV=1	Syrmaticus soemmerringii	-	3.2.1.17		0	0	0.00557877	0	0	0
		LYSC_PHOVI Lysozyme C OS=Phoca vitulina GN=LYZ PE=2 SV=1	Chordata	K13915	3.2.1.17		0	0	0.00557877	0	0	0
							0	0.00469197	0.0167363	0.007347	0.00731261	0.00765521		0.958119	0.0584862
	Lactalbumin	LALBA_RAT Alpha-lactalbumin OS=Rattus norvegicus GN=Lalba PE=1 SV=1	Rattus norvegicus	K00704	-		0	0	0	0	0	0
							0	0	0	0	0	0		-	-
	Peptidoglycan transglycosylases	MTGA_CYTH3 Monofunctional biosynthetic peptidoglycan transglycosylase OS=Cytophaga hutchinsonii (strain ATCC 33406 / NCIMB 9469) GN=mtgA PE=3 SV=1	Cytophaga hutchinsonii ATCC 33406	K03814	2.4.2.-		0.00541859	0	0	0	0	0
							0.00541859	0	0	0	0	0		-	-
	Alpha mannosidases	G1M054_AILME Alpha-mannosidase OS=Ailuropoda melanoleuca GN=MAN2B1 PE=3 SV=1	Ailuropoda melanoleuca	-	3.2.1.-		0.0108372	0.0375358	0.00557877	0	0	0
		MANA_CANEN Alpha-mannosidase OS=Canavalia ensiformis PE=1 SV=1	Canavalia ensiformis	-	3.2.1.24		0	0	0	0	0	0
							0.0108372	0.0375358	0.00557877	0	0	0		0.210721	-
	Transglycosylases	MTGA_CYTH3 Monofunctional biosynthetic peptidoglycan transglycosylase OS=Cytophaga hutchinsonii (strain ATCC 33406 / NCIMB 9469) GN=mtgA PE=3 SV=1	Cytophaga hutchinsonii ATCC 33406	K03814	2.4.2.-		0.00541859	0	0	0	0	0
							0.00541859	0	0	0	0	0		0.42265	-
	Hexosaminidases	STRH_STRPN Beta-N-acetylhexosaminidase OS=Streptococcus pneumoniae serotype 4 (strain ATCC BAA-334 / TIGR4) GN=strH PE=1 SV=2	Streptococcus pneumoniae TIGR4	K12373	3.2.1.52		0	0	0	0	0.00365631	0
							0	0	0	0	0.00365631	0		0.42265	-
	Epimerases	YEAD_ECOLI Putative glucose-6-phosphate 1-epimerase OS=Escherichia coli (strain K12) GN=yeaD PE=1 SV=2	Escherichia coli K-12	K01792	5.1.3.15		0	0.00469197	0	0	0	0
		MG: UDP-glucose 4-epimerase OS=Bacillus subtilis (strain 168) GN=galE PE=3 SV=1 [P55180] Score: 475.0	Bacillus subtilis subsp. subtilis str. 168	K01784	5.1.3.2		0	0	0	0	0.00365631	0
		GALE_ECOLI UDP-glucose 4-epimerase OS=Escherichia coli (strain K12) GN=galE PE=1 SV=1	Escherichia coli K-12	K01784	5.1.3.2		0	0	0	0.0036735	0.00365631	0
		HLDD_AERS4 ADP-L-glycero-D-manno-heptose-6-epimerase OS=Aeromonas salmonicida (strain A449) GN=hldD PE=3 SV=1	Aeromonas	K03274	5.1.3.20		0	0	0	0	0	0
		HLDD_SALTY ADP-L-glycero-D-manno-heptose-6-epimerase OS=Salmonella typhimurium (strain LT2 / SGSC1412 / ATCC 700720) GN=hldD PE=3 SV=1	Gammaproteobacteria	K03274	5.1.3.20		0	0	0	0	0	0
		HLDD_BURXL ADP-L-glycero-D-manno-heptose-6-epimerase OS=Burkholderia xenovorans (strain LB400) GN=hldD PE=3 SV=1	Proteobacteria	K03274	5.1.3.20		0	0	0	0	0	0
		NANE_STAAN Putative N-acetylmannosamine-6-phosphate 2-epimerase OS=Staphylococcus aureus (strain N315) GN=nanE PE=1 SV=1	Staphylococcus aureus subsp. aureus	K01788	5.1.3.9		0.00541859	0.0140759	0	0	0	0
		NANE_STACT Putative N-acetylmannosamine-6-phosphate 2-epimerase OS=Staphylococcus carnosus (strain TM300) GN=nanE PE=3 SV=1	Staphylococcus carnosus subsp. carnosus TM300	K01788	5.1.3.9		0	0.00469197	0.00557877	0	0	0
							0.00541859	0.0234599	0.00557877	0.0036735	0.00731261	0		0.321428	-1.64912
	Cellobiose-related enzymes	MG: Cellobiose-specific phosphotransferase enzyme IIB component OS=Geobacillus stearothermophilus GN=celA PE=3 SV=1 [Q45399] Score: 99.4	Geobacillus stearothermophilus	-	2.7.1.205		0	0	0	0.0036735	0	0.0038276
							0	0	0	0.0036735	0	0.0038276		0.183676	-
