# Supplementary material for: Lignocellulose Fermentation Products Generated by Giant Panda Gut Microbiomes Depend Ultimately on pH Rather than Portion of Bamboo: A Preliminary Study
Source: Microorganisms. 2022 May 7;10(5):978. doi: 10.3390/microorganisms10050978 (PMC9146640; doi:10.3390/microorganisms10050978)
Supplement: Supplementary file 1 [file microorganisms-10-00978-s001.zip › Table S4 All Metaproteins.xlsx]

## Sheet: Table S4
Table S4. Expression of metaproteins (UniProtBB) in in vitro incubation tests with microbiomes derived from giant panda gut samples (see Figure 1 for the experimental set up).
Description	Taxonomy	KO	EC	Inoculum	Standard			Standard			Dewatered			Standard
				Added Substrate	Leaf			None			Leaf			Leaf
				Label	Inoculum +Leaf (pH 6.5)			Inoculum			De-H2O Inoculum +Leaf			Inoculum +Leaf (pH 4.5)
				Replicate	1	2	3	1	2	3	1	2	3	1	2	3
MG: Putative NADH dehydrogenase/NAD(P)H nitroreductase AF_0226 OS=Archaeoglobus fulgidus (strain ATCC 49558 / VC-16 / DSM 4304 / JCM 9628 / NBRC 100126) GN=AF_0226 PE=3 SV=1 [O30013] Score: 72.0	Archaeoglobus fulgidus DSM 4304	-	1.-.-.-		0	0	0	0	0	0	0.00497934	0.00315507	0.0043262	0	0.00365631	0
NEMA_ECOLI N-ethylmaleimide reductase OS=Escherichia coli (strain K12) GN=nemA PE=2 SV=1	Escherichia coli K-12	K10680	1.-.-.-		0	0	0	0	0	0	0.00995867	0.00946522	0.0173048	0.0036735	0.00365631	0
NFSB_ECOLI Oxygen-insensitive NAD(P)H nitroreductase OS=Escherichia coli (strain K12) GN=nfsB PE=1 SV=1	Escherichia coli K-12	K10679	1.-.-.- 1.5.1.34		0	0	0	0	0	0	0	0	0.0043262	0	0	0
LLDD_SALSV L-lactate dehydrogenase OS=Salmonella schwarzengrund (strain CVM19633) GN=lldD PE=3 SV=1	Salmonella enterica	K00101	1.1.-.-		0	0	0	0	0	0	0	0	0	0	0.00365631	0
MG: Putative 6-phosphogluconate dehydrogenase YqeC OS=Bacillus subtilis (strain 168) GN=yqeC PE=3 SV=1 [P54448] Score: 360.0	Bacillus subtilis subsp. subtilis str. 168	K00033	1.1.1.-		0	0	0	0	0	0	0	0	0	0	0	0
DHL2_WEICO L-2-hydroxyisocaproate dehydrogenase OS=Weissella confusa PE=1 SV=3	Weissella confusa	-	1.1.1.-		0	0	0	0	0	0	0	0	0	0	0	0
MG: NADPH-dependent butanol dehydrogenase OS=Clostridium saccharobutylicum GN=adh1 PE=3 SV=1 [P13604] Score: 597.0	Clostridium saccharobutylicum	-	1.1.1.-		0	0	0	0	0	0	0.00995867	0.00946522	0.0173048	0.014694	0.0109689	0.0153104
MG: Alcohol dehydrogenase YqhD OS=Escherichia coli (strain K12) GN=yqhD PE=1 SV=1 [Q46856] Score: 430.0	Escherichia coli K-12	K08325	1.1.1.-		0	0.00469197	0	0.0233121	0	0	0.07469	0.0631014	0.0648929	0.0330615	0.0255941	0.0038276
MDH1B_BOVIN Putative malate dehydrogenase 1B OS=Bos taurus GN=MDH1B PE=2 SV=1	Bos taurus	-	1.1.1.-		0	0	0.00557877	0	0	0	0	0	0	0	0	0
TIC32_PEA Short-chain dehydrogenase TIC 32, chloroplastic OS=Pisum sativum GN=TIC32 PE=1 SV=1	Pisum sativum	-	1.1.1.-		0	0	0.00557877	0	0	0	0	0	0.00865239	0.0036735	0	0
ADH_SULAC NAD-dependent alcohol dehydrogenase OS=Sulfolobus acidocaldarius (strain ATCC 33909 / DSM 639 / JCM 8929 / NBRC 15157 / NCIMB 11770) GN=adh PE=3 SV=1	Sulfolobus acidocaldarius DSM 639	K13953	1.1.1.1		0	0	0	0	0	0	0	0	0	0	0	0
MG: Alcohol dehydrogenase 1 OS=Zymomonas mobilis subsp. mobilis (strain ATCC 31821 / ZM4 / CP4) GN=adhA PE=1 SV=2 [P20368] Score: 363.0	Zymomonas mobilis subsp. mobilis ZM4 = ATCC 31821	K13953	1.1.1.1		0	0	0	0	0	0	0	0	0	0	0	0
ADH4_RAT Alcohol dehydrogenase 4 OS=Rattus norvegicus GN=Adh4 PE=2 SV=3	Rattus norvegicus	-	1.1.1.1		0	0	0	0	0	0	0	0	0	0	0	0
MG: Aldehyde-alcohol dehydrogenase OS=Escherichia coli (strain K12) GN=adhE PE=1 SV=2 [P0A9Q7] Score: 313.0	Bacteria	K04072	1.1.1.1 1.2.1.10		0.00541859	0	0.0223151	0.00466242	0	0.00473393	0.00995867	0.00315507	0.00865239	0.007347	0	0.0038276
MG: Aldehyde-alcohol dehydrogenase 2 OS=Entamoeba histolytica GN=ADH2 PE=1 SV=1 [Q24803] Score: 788.0	root	-	1.1.1.1 1.2.1.10		0.00541859	0	0	0	0	0	0	0	0.0043262	0.0036735	0	0.0038276
MG: Aldehyde-alcohol dehydrogenase OS=Clostridium acetobutylicum (strain ATCC 824 / DSM 792 / JCM 1419 / LMG 5710 / VKM B-1787) GN=adhE PE=2 SV=3 [P33744] Score: 763.0	Bacteria	K04072	1.1.1.1 1.2.1.3		0.00541859	0	0	0	0	0	0.00497934	0.00315507	0.0129786	0.0110205	0.00731261	0.00765521
FABG_SHIFL 3-oxoacyl-[acyl-carrier-protein] reductase FabG OS=Shigella flexneri GN=fabG PE=3 SV=1	Enterobacteriaceae	K00059	1.1.1.100		0	0	0	0	0	0	0	0	0	0	0	0
MG: Probable 3-hydroxybutyryl-CoA dehydrogenase OS=Bacillus subtilis (strain 168) GN=mmgB PE=2 SV=1 [P45856] Score: 386.0	Bacteria	K00074	1.1.1.157		0	0	0	0	0	0	0.00497934	0	0	0.0036735	0.00365631	0
MG: 3-hydroxybutyryl-CoA dehydrogenase OS=Clostridium acetobutylicum (strain ATCC 824 / DSM 792 / JCM 1419 / LMG 5710 / VKM B-1787) GN=hbd PE=1 SV=2 [P52041] Score: 463.0	Bacteria	K00074	1.1.1.157		0	0	0	0	0	0	0	0	0	0.0036735	0.00365631	0
HDHA_ECOLI 7-alpha-hydroxysteroid dehydrogenase OS=Escherichia coli (strain K12) GN=hdhA PE=1 SV=1	Escherichia coli	K00076	1.1.1.159		0	0	0	0	0	0	0	0	0	0	0	0
MTLD_ECOLI Mannitol-1-phosphate 5-dehydrogenase OS=Escherichia coli (strain K12) GN=mtlD PE=1 SV=3	Enterobacteriaceae	K00009	1.1.1.17		0	0	0	0	0	0	0.00497934	0	0.0043262	0	0.00365631	0
MG: Prostaglandin F synthase OS=Leishmania major GN=P100/11E PE=1 SV=3 [P22045] Score: 279.0	Leishmania major	-	1.1.1.188		0	0	0	0	0	0	0	0	0	0	0	0
CADH1_ORYSJ Probable cinnamyl alcohol dehydrogenase 1 OS=Oryza sativa subsp. japonica GN=CAD1 PE=2 SV=1	Oryza sativa Japonica Group	K00083	1.1.1.195		0	0	0	0	0	0	0	0	0	0	0	0
YAHK_ECOLI Aldehyde reductase YahK OS=Escherichia coli (strain K12) GN=yahK PE=1 SV=1	Escherichia coli K-12	K13979	1.1.1.2		0	0	0	0	0	0	0	0	0	0	0	0
IMDH_STRPQ Inosine-5-monophosphate dehydrogenase OS=Streptococcus pyogenes serotype M3 (strain SSI-1) GN=guaB PE=3 SV=1	Streptococcus pyogenes	K00088	1.1.1.205		0	0.00469197	0	0	0	0.00473393	0.014938	0.0126203	0.0302834	0.007347	0.0146252	0
IMDH_TRIFO Inosine-5-monophosphate dehydrogenase OS=Tritrichomonas foetus GN=IMPDH PE=1 SV=1	Tritrichomonas suis	-	1.1.1.205		0	0	0	0	0	0	0	0	0	0	0	0
IMDH_BIFLO Inosine-5-monophosphate dehydrogenase OS=Bifidobacterium longum (strain NCC 2705) GN=guaB PE=3 SV=1	root	K00088	1.1.1.205		0	0.00469197	0	0	0	0.00473393	0	0	0	0	0.00365631	0
IMDH_BORBU Inosine-5-monophosphate dehydrogenase OS=Borrelia burgdorferi (strain ATCC 35210 / B31 / CIP 102532 / DSM 4680) GN=guaB PE=1 SV=1	root	K00088	1.1.1.205		0	0.00469197	0	0	0	0.00473393	0	0.00315507	0.0043262	0	0.00731261	0
IMDH_HALSA Inosine-5-monophosphate dehydrogenase OS=Halobacterium salinarum (strain ATCC 700922 / JCM 11081 / NRC-1) GN=guaB PE=3 SV=2	root	K00088	1.1.1.205		0	0.00469197	0	0	0	0.00473393	0	0	0	0	0.00365631	0
IMDH_CRYPV Inosine-5-monophosphate dehydrogenase OS=Cryptosporidium parvum GN=56k.02 PE=1 SV=1	root	-	1.1.1.205		0	0.00469197	0	0	0	0.00473393	0	0	0	0	0.00365631	0
HISX_STRMU Histidinol dehydrogenase OS=Streptococcus mutans serotype c (strain ATCC 700610 / UA159) GN=hisD PE=3 SV=1	Streptococcus mutans UA159	K00013	1.1.1.23		0	0	0	0	0	0	0	0	0	0	0	0
HISX_DESPS Histidinol dehydrogenase OS=Desulfotalea psychrophila (strain LSv54 / DSM 12343) GN=hisD PE=3 SV=1	Desulfotalea psychrophila LSv54	K00013	1.1.1.23		0	0	0	0	0	0	0	0	0	0	0.00365631	0
AROE_ARCFU Shikimate dehydrogenase (NADP(+)) OS=Archaeoglobus fulgidus (strain ATCC 49558 / VC-16 / DSM 4304 / JCM 9628 / NBRC 100126) GN=aroE PE=3 SV=1	Archaeoglobus fulgidus DSM 4304	K00014	1.1.1.25		0	0	0	0	0	0	0.00497934	0	0	0	0	0
AROE_RUBXD Shikimate dehydrogenase (NADP(+)) OS=Rubrobacter xylanophilus (strain DSM 9941 / NBRC 16129) GN=aroE PE=3 SV=1	Rubrobacter xylanophilus DSM 9941	K00014	1.1.1.25		0	0	0	0	0	0	0	0	0	0	0	0.0038276
AROE_MARHV Shikimate dehydrogenase (NADP(+)) OS=Marinobacter hydrocarbonoclasticus (strain ATCC 700491 / DSM 11845 / VT8) GN=aroE PE=3 SV=1	Marinobacter aquaeolei VT8	K00014	1.1.1.25		0	0	0	0	0	0	0.00497934	0	0	0	0	0
G1PDH_METLZ Glycerol-1-phosphate dehydrogenase [NAD(P)+] OS=Methanocorpusculum labreanum (strain ATCC 43576 / DSM 4855 / Z) GN=egsA PE=3 SV=1	Methanocorpusculum labreanum Z	K00096	1.1.1.261		0	0	0	0	0	0	0	0	0	0	0	0
PDXA_ZYMMO 4-hydroxythreonine-4-phosphate dehydrogenase OS=Zymomonas mobilis subsp. mobilis (strain ATCC 31821 / ZM4 / CP4) GN=pdxA PE=3 SV=1	Zymomonas mobilis subsp. mobilis ZM4 = ATCC 31821	K00097	1.1.1.262		0	0	0	0	0	0	0	0	0	0	0	0.0038276
DXR_BACSU 1-deoxy-D-xylulose 5-phosphate reductoisomerase OS=Bacillus subtilis (strain 168) GN=dxr PE=3 SV=2	Bacillus	K00099	1.1.1.267		0	0	0	0	0	0	0	0	0	0	0	0
DXR_BORBR 1-deoxy-D-xylulose 5-phosphate reductoisomerase OS=Bordetella bronchiseptica (strain ATCC BAA-588 / NCTC 13252 / RB50) GN=dxr PE=3 SV=1	Bordetella bronchiseptica RB50	K00099	1.1.1.267		0	0	0	0	0	0	0	0.00315507	0	0	0	0
LDH2_LACAC L-lactate dehydrogenase 2 OS=Lactobacillus acidophilus (strain ATCC 700396 / NCK56 / N2 / NCFM) GN=ldh2 PE=3 SV=1	Lactobacillus acidophilus NCFM	K00016	1.1.1.27		0	0	0	0	0	0	0	0	0.0043262	0	0	0
LDH_LACPE L-lactate dehydrogenase OS=Lactobacillus pentosus GN=ldh PE=1 SV=1	Lactobacillales	-	1.1.1.27		0	0	0	0	0	0	0	0.00315507	0	0	0	0
LDH1_LISIN L-lactate dehydrogenase 1 OS=Listeria innocua serovar 6a (strain CLIP 11262) GN=ldh1 PE=3 SV=1	Bacilli	K00016	1.1.1.27		0	0	0.00557877	0	0	0	0.0199173	0.0189304	0.0129786	0.0110205	0.0146252	0.0306208
LDH_LACF3 L-lactate dehydrogenase OS=Lactobacillus fermentum (strain NBRC 3956 / LMG 18251) GN=ldh PE=3 SV=1	Bacilli	K00016	1.1.1.27		0	0	0.00557877	0	0	0	0.0199173	0.0189304	0.0129786	0.0110205	0.0146252	0.0306208
LDH_STRZT L-lactate dehydrogenase OS=Streptococcus pneumoniae (strain Taiwan19F-14) GN=ldh PE=3 SV=1	Bacilli	K00016	1.1.1.27		0.0433487	0.0281518	0.0557877	0.0233121	0.0279799	0.0284036	0.0697107	0.0788768	0.0475881	0.044082	0.0511883	0.0803797
LDH_MYCMS L-lactate dehydrogenase OS=Mycoplasma mycoides subsp. mycoides SC (strain PG1) GN=ldh PE=3 SV=1	Mycoplasma mycoides subsp. mycoides SC str. PG1	K00016	1.1.1.27		0	0	0.00557877	0	0	0	0	0	0.0129786	0.0036735	0.00731261	0.0038276
LDH_PSELT L-lactate dehydrogenase OS=Pseudothermotoga lettingae (strain ATCC BAA-301 / DSM 14385 / NBRC 107922 / TMO) GN=ldh PE=3 SV=1	Thermotoga lettingae TMO	K00016	1.1.1.27		0	0	0	0	0	0	0	0.00315507	0.0043262	0	0	0
LDH_PETMO L-lactate dehydrogenase OS=Petrotoga mobilis (strain DSM 10674 / SJ95) GN=ldh PE=3 SV=1	Thermotogaceae	K00016	1.1.1.27		0	0	0	0	0	0	0	0	0	0	0	0
LDH2_BACCZ L-lactate dehydrogenase 2 OS=Bacillus cereus (strain ZK / E33L) GN=ldh2 PE=3 SV=1	Bacteria	K00016	1.1.1.27		0	0	0	0	0	0	0	0	0	0	0	0
ERG27_KLULA 3-keto-steroid reductase OS=Kluyveromyces lactis (strain ATCC 8585 / CBS 2359 / DSM 70799 / NBRC 1267 / NRRL Y-1140 / WM37) GN=ERG27 PE=3 SV=1	Kluyveromyces lactis NRRL Y-1140	K09827	1.1.1.270		0	0	0	0	0	0	0	0	0	0	0	0
DKGA_ECOLI 2,5-diketo-D-gluconic acid reductase A OS=Escherichia coli (strain K12) GN=dkgA PE=1 SV=3	Escherichia coli K-12	K06221	1.1.1.274		0	0	0	0.00466242	0	0.00473393	0.00497934	0.00631014	0.0043262	0.0036735	0	0.0038276
LDHD_LACDA D-lactate dehydrogenase OS=Lactobacillus delbrueckii subsp. bulgaricus (strain ATCC 11842 / DSM 20081 / JCM 1002 / NBRC 13953 / NCIMB 11778) GN=ldhA PE=1 SV=3	Lactobacillales	-	1.1.1.28		0	0	0	0	0	0	0	0	0	0	0	0
YDIB_ECO5E Quinate/shikimate dehydrogenase OS=Escherichia coli O157:H7 (strain EC4115 / EHEC) GN=ydiB PE=3 SV=1	Escherichia coli	K05887	1.1.1.282		0	0	0	0	0.00466331	0	0	0	0	0	0	0
FRMA_ECOL5 S-(hydroxymethyl)glutathione dehydrogenase OS=Escherichia coli O6:K15:H31 (strain 536 / UPEC) GN=frmA PE=3 SV=1	Enterobacteriaceae	K00121	1.1.1.284 1.1.1.1 1.1.1.-		0	0	0	0	0	0	0.00995867	0.00631014	0.00865239	0	0.00731261	0
MG: Diacetyl reductase [(S)-acetoin forming] OS=Staphylococcus aureus (strain MRSA252) GN=butA PE=3 SV=1 [Q6GKH9] Score: 314.0	Staphylococcus aureus subsp. aureus	K03366	1.1.1.304		0	0	0	0	0	0	0	0	0	0	0	0
EGS1_OCIBA Eugenol synthase 1 OS=Ocimum basilicum GN=EGS1 PE=1 SV=1	Ocimum basilicum	K17055	1.1.1.318		0	0	0	0	0	0	0	0	0	0	0	0
MKAR_CHAGB Very-long-chain 3-oxoacyl-CoA reductase OS=Chaetomium globosum (strain ATCC 6205 / CBS 148.51 / DSM 1962 / NBRC 6347 / NRRL 1970) GN=CHGG_04239 PE=3 SV=1	Chaetomium globosum CBS 148.51	-	1.1.1.330		0	0	0	0	0	0	0.00497934	0	0	0	0	0
SILD_FORIN Secoisolariciresinol dehydrogenase (Fragment) OS=Forsythia intermedia PE=1 SV=1	Forsythia x intermedia	-	1.1.1.331		0	0	0	0	0	0	0.00497934	0	0	0	0	0
HMDH1_YEAST 3-hydroxy-3-methylglutaryl-coenzyme A reductase 1 OS=Saccharomyces cerevisiae (strain ATCC 204508 / S288c) GN=HMG1 PE=1 SV=1	Saccharomyces cerevisiae S288c	K00021	1.1.1.34		0	0	0	0	0	0	0	0	0	0	0	0
RFBJ_SALMU CDP-abequose synthase OS=Salmonella muenchen GN=rfbJ PE=3 SV=1	Salmonella enterica subsp. enterica serovar Muenchen	-	1.1.1.341		0	0	0	0	0	0	0	0	0	0	0	0
MDH_PARD8 Malate dehydrogenase OS=Parabacteroides distasonis (strain ATCC 8503 / DSM 20701 / NCTC 11152) GN=mdh PE=3 SV=1	Parabacteroides distasonis ATCC 8503	K00024	1.1.1.37		0	0	0	0.00932484	0.00466331	0.00473393	0.00497934	0.00315507	0.00865239	0	0	0
MDH_CHLT3 Malate dehydrogenase OS=Chloroherpeton thalassium (strain ATCC 35110 / GB-78) GN=mdh PE=3 SV=1	Chloroherpeton thalassium ATCC 35110	K00024	1.1.1.37		0	0	0	0	0	0	0	0	0	0	0	0
MDH_KLEPN Malate dehydrogenase (Fragments) OS=Klebsiella pneumoniae GN=mdh PE=1 SV=1	Klebsiella pneumoniae	-	1.1.1.37		0.0108372	0.00938394	0	0.0466242	0.0186532	0.0331375	0.0946074	0.0725667	0.0865239	0.036735	0.0255941	0.00765521
MDH_ERWT9 Malate dehydrogenase OS=Erwinia tasmaniensis (strain DSM 17950 / CIP 109463 / Et1/99) GN=mdh PE=3 SV=1	Gammaproteobacteria	K00024	1.1.1.37		0.0108372	0.00938394	0	0.0186497	0.0139899	0.0142018	0.044814	0.0504811	0.0389358	0.014694	0.0255941	0.0344484
MDH_AERS4 Malate dehydrogenase OS=Aeromonas salmonicida (strain A449) GN=mdh PE=3 SV=1	Gammaproteobacteria	K00024	1.1.1.37		0.0487673	0.0469197	0.0111575	0.0792611	0.0652863	0.0378714	0.159339	0.170374	0.12546	0.0697965	0.0694698	0.0765521
MDH_KLEVA Malate dehydrogenase (Fragment) OS=Klebsiella variicola GN=mdh PE=3 SV=1	Gammaproteobacteria	K00024	1.1.1.37		0.065023	0.0703796	0.0111575	0.144535	0.102593	0.0852107	0.22407	0.258716	0.224962	0.080817	0.095064	0.0803797
MDH_SHIB3 Malate dehydrogenase OS=Shigella boydii serotype 18 (strain CDC 3083-94 / BS512) GN=mdh PE=3 SV=1	Gammaproteobacteria	K00024	1.1.1.37		0.065023	0.0703796	0.0111575	0.163185	0.102593	0.0852107	0.239008	0.261871	0.229288	0.080817	0.095064	0.0803797
MDH_SHIF8 Malate dehydrogenase OS=Shigella flexneri serotype 5b (strain 8401) GN=mdh PE=3 SV=1	Gammaproteobacteria	K00024	1.1.1.37		0.065023	0.0609956	0.0111575	0.139873	0.102593	0.0804768	0.258925	0.268181	0.233615	0.080817	0.095064	0.0803797
MDH_YERPY Malate dehydrogenase OS=Yersinia pseudotuberculosis serotype O:3 (strain YPIII) GN=mdh PE=3 SV=1	Gammaproteobacteria	K00024	1.1.1.37		0.0487673	0.0469197	0.0111575	0.0792611	0.0652863	0.0426054	0.169297	0.182994	0.112481	0.066123	0.0731261	0.0803797
MDH_VIBVU Malate dehydrogenase OS=Vibrio vulnificus (strain CMCP6) GN=mdh PE=1 SV=1	Gammaproteobacteria	K00024	1.1.1.37		0.0162558	0.00938394	0	0.0326369	0.0233165	0.00946786	0.0497934	0.0599464	0.0302834	0.0330615	0.0255941	0.0153104
MDH_PSEA6 Malate dehydrogenase OS=Pseudoalteromonas atlantica (strain T6c / ATCC BAA-1087) GN=mdh PE=3 SV=1	Gammaproteobacteria	K00024	1.1.1.37		0.00541859	0.00469197	0	0.00932484	0	0.00473393	0.014938	0.0189304	0.0129786	0.0110205	0.0109689	0.019138
MDH_PECCC Malate dehydrogenase (Fragment) OS=Pectobacterium carotovorum subsp. carotovorum GN=mdh PE=3 SV=1	Gammaproteobacteria	-	1.1.1.37		0.0108372	0.00938394	0.00557877	0.00932484	0.0139899	0.00946786	0.00497934	0.0283956	0	0	0	0
MDH_ACTPJ Malate dehydrogenase OS=Actinobacillus pleuropneumoniae serotype 3 (strain JL03) GN=mdh PE=3 SV=1	Gammaproteobacteria	K00024	1.1.1.37		0	0	0	0	0	0	0	0	0	0	0	0
MDHM_IMPCY Malate dehydrogenase, mitochondrial (Fragments) OS=Imperata cylindrica PE=1 SV=1	Streptophyta	-	1.1.1.37		0	0	0	0	0	0	0	0	0	0	0	0
MDHC_MESCR Malate dehydrogenase, cytoplasmic OS=Mesembryanthemum crystallinum GN=MDH PE=2 SV=1	Streptophyta	-	1.1.1.37		0	0	0	0	0	0	0	0	0	0	0	0
MDHC_ORYSJ Malate dehydrogenase, cytoplasmic OS=Oryza sativa subsp. japonica GN=Os10g0478200 PE=1 SV=3	Streptophyta	K00025	1.1.1.37		0	0	0	0	0	0	0	0	0	0	0	0
MDHG1_BRANA Malate dehydrogenase 1, glyoxysomal OS=Brassica napus GN=MDH1 PE=2 SV=2	root	-	1.1.1.37		0	0	0	0	0	0	0	0	0	0	0	0
MDH_PSEMZ Malate dehydrogenase (Fragments) OS=Pseudotsuga menziesii PE=1 SV=1	root	-	1.1.1.37		0	0	0	0	0	0	0	0	0	0	0	0
SQUU_ECOLI 3-sulfolactaldehyde reductase OS=Escherichia coli (strain K12) GN=yihU PE=1 SV=1	Escherichia coli K-12	K08318	1.1.1.373		0	0	0	0	0	0.00473393	0	0	0	0	0.00365631	0
MG: NAD-dependent malic enzyme OS=Geobacillus stearothermophilus PE=1 SV=1 [P16468] Score: 481.0	Geobacillus stearothermophilus	-	1.1.1.38		0	0	0	0	0	0	0	0.00315507	0.0043262	0	0	0
MAO1_COLP3 NAD-dependent malic enzyme OS=Colwellia psychrerythraea (strain 34H / ATCC BAA-681) GN=maeA PE=3 SV=1	Colwellia psychrerythraea 34H	K00027	1.1.1.38		0	0	0	0	0	0	0.00497934	0	0.0129786	0.0036735	0	0.00765521
YDFG_ECO57 NADP-dependent 3-hydroxy acid dehydrogenase YdfG OS=Escherichia coli O157:H7 GN=ydfG PE=3 SV=1	Escherichia coli O157:H7	K16066	1.1.1.381 1.1.1.298		0	0	0	0	0	0	0.00497934	0.00631014	0	0	0	0
MAO2_ARATH NAD-dependent malic enzyme 2, mitochondrial OS=Arabidopsis thaliana GN=NAD-ME2 PE=1 SV=1	Arabidopsis thaliana	K00028	1.1.1.39		0	0	0	0	0	0	0	0	0	0	0	0
MG: (R,R)-butanediol dehydrogenase OS=Bacillus subtilis (strain 168) GN=bdhA PE=3 SV=1 [O34788] Score: 243.0	Bacillus subtilis subsp. subtilis str. 168	K00004	1.1.1.4		0	0	0	0	0	0	0	0	0	0	0	0
IDH_BACSU Isocitrate dehydrogenase [NADP] OS=Bacillus subtilis (strain 168) GN=icd PE=1 SV=1	Bacillus subtilis subsp. subtilis str. 168	K00031	1.1.1.42		0	0	0	0	0	0	0	0	0	0	0	0
IDH_ECOLI Isocitrate dehydrogenase [NADP] OS=Escherichia coli (strain K12) GN=icd PE=1 SV=1	Escherichia coli K-12	K00031	1.1.1.42		0	0	0	0	0	0	0.0348554	0.0252406	0.021631	0.014694	0.00731261	0
IDHC_SOLTU Isocitrate dehydrogenase [NADP] OS=Solanum tuberosum GN=ICDH-1 PE=2 SV=1	Streptophyta	-	1.1.1.42		0	0	0	0	0	0	0	0	0	0	0	0
IDHC_SOYBN Isocitrate dehydrogenase [NADP] OS=Glycine max GN=IDH1 PE=2 SV=2	Streptophyta	K00031	1.1.1.42		0	0	0	0	0	0	0	0	0	0	0	0
6PGD_BUCAI 6-phosphogluconate dehydrogenase, decarboxylating OS=Buchnera aphidicola subsp. Acyrthosiphon pisum (strain APS) GN=gnd PE=3 SV=1	Buchnera aphidicola str. APS (Acyrthosiphon pisum)	K00033	1.1.1.44		0	0	0	0	0	0.00473393	0.0398347	0.0220855	0.0302834	0.014694	0.0146252	0
6PGD_BACSU 6-phosphogluconate dehydrogenase, NADP(+)-dependent, decarboxylating OS=Bacillus subtilis (strain 168) GN=gndA PE=1 SV=4	Bacteria	K00033	1.1.1.44		0	0	0	0	0	0	0	0	0	0	0	0
6PGD_SCHPO 6-phosphogluconate dehydrogenase, decarboxylating OS=Schizosaccharomyces pombe (strain 972 / ATCC 24843) GN=SPBC660.16 PE=1 SV=2	Schizosaccharomyces pombe 972h-	K00033	1.1.1.44		0	0	0	0	0	0	0	0	0	0	0	0
G6PD_LEUME Glucose-6-phosphate 1-dehydrogenase OS=Leuconostoc mesenteroides GN=zwf PE=1 SV=4	Leuconostoc mesenteroides	K00036	1.1.1.49		0	0	0	0	0	0	0	0	0	0	0	0
G6PDC_SPIOL Glucose-6-phosphate 1-dehydrogenase, chloroplastic OS=Spinacia oleracea GN=G6PD PE=2 SV=1	Streptophyta	-	1.1.1.49		0	0	0	0	0	0	0	0	0	0	0	0
UXAB_SHISS Altronate oxidoreductase OS=Shigella sonnei (strain Ss046) GN=uxaB PE=3 SV=1	Enterobacteriaceae	K00041	1.1.1.58		0	0	0	0	0	0	0.00497934	0.00631014	0.0129786	0.007347	0.00365631	0.0038276
GLDA_ECOL6 Glycerol dehydrogenase OS=Escherichia coli O6:H1 (strain CFT073 / ATCC 700928 / UPEC) GN=gldA PE=3 SV=1	Gammaproteobacteria	K00005	1.1.1.6		0	0	0	0	0	0	0.00995867	0.0126203	0.0173048	0.0036735	0.00731261	0.0344484
GARR_ECOLI 2-hydroxy-3-oxopropionate reductase OS=Escherichia coli (strain K12) GN=garR PE=1 SV=1	Escherichia coli	K00042	1.1.1.60		0.00541859	0.0140759	0.00557877	0.055949	0.0279799	0.0520732	0.0647314	0.0567913	0.0519143	0.051429	0.0511883	0.019138
PLR1_SCHPO Pyridoxal reductase OS=Schizosaccharomyces pombe (strain 972 / ATCC 24843) GN=plr1 PE=1 SV=1	Schizosaccharomyces pombe 972h-	K05275	1.1.1.65		0	0	0	0.00932484	0.00466331	0	0	0	0	0	0	0
IDNO_ECOLI Gluconate 5-dehydrogenase OS=Escherichia coli (strain K12) GN=idnO PE=3 SV=1	Escherichia coli	K00046	1.1.1.69		0	0.00469197	0	0.00466242	0	0.00473393	0.00995867	0	0.00865239	0.007347	0.00731261	0.0153104
MG: Lactaldehyde reductase OS=Escherichia coli (strain K12) GN=fucO PE=1 SV=2 [P0A9S1] Score: 420.0	Escherichia coli	K00048	1.1.1.77		0	0	0	0.00932484	0.0139899	0.0189357	0	0.00631014	0.0043262	0.0183675	0.0146252	0.0114828
GLYR1_ARATH Glyoxylate/succinic semialdehyde reductase 1 OS=Arabidopsis thaliana GN=GLYR1 PE=1 SV=1	Arabidopsis thaliana	K18121	1.1.1.79 1.1.1.n11		0	0	0	0	0	0	0	0	0	0	0	0
LEU3_SULTO 3-isopropylmalate dehydrogenase OS=Sulfolobus tokodaii (strain DSM 16993 / JCM 10545 / NBRC 100140 / 7) GN=leuB PE=1 SV=3	Sulfolobus tokodaii str. 7	K00052	1.1.1.85		0	0	0	0	0	0	0	0	0	0	0	0
LEU3_STRT1 3-isopropylmalate dehydrogenase OS=Streptococcus thermophilus (strain CNRZ 1066) GN=leuB PE=3 SV=2	Streptococcus thermophilus	K00052	1.1.1.85		0	0	0	0	0	0	0	0	0	0	0	0
ILVC_STRS2 Ketol-acid reductoisomerase OS=Streptococcus suis (strain 98HAH33) GN=ilvC PE=3 SV=1	Streptococcus suis 98HAH33	K00053	1.1.1.86		0	0.00469197	0.00557877	0	0	0	0	0	0	0	0	0
ILVC_STRT2 Ketol-acid reductoisomerase OS=Streptococcus thermophilus (strain ATCC BAA-250 / LMG 18311) GN=ilvC PE=3 SV=1	Streptococcus	K00053	1.1.1.86		0	0.00469197	0.00557877	0	0	0	0	0	0	0	0	0
ILVC_LACLM Ketol-acid reductoisomerase OS=Lactococcus lactis subsp. cremoris (strain MG1363) GN=ilvC PE=3 SV=1	Streptococcaceae	K00053	1.1.1.86		0	0.00469197	0.00557877	0	0	0	0	0	0	0	0	0
MG: Ketol-acid reductoisomerase OS=Clostridium beijerinckii (strain ATCC 51743 / NCIMB 8052) GN=ilvC PE=3 SV=1 [A6LPX8] Score: 105.0	Clostridium beijerinckii NCIMB 8052	K00053	1.1.1.86		0	0.00469197	0.00557877	0	0	0	0.00497934	0.00315507	0.00865239	0.0036735	0.00365631	0
ILVC_NOVAD Ketol-acid reductoisomerase OS=Novosphingobium aromaticivorans (strain DSM 12444 / F199) GN=ilvC PE=3 SV=1	Sphingomonadaceae	K00053	1.1.1.86		0	0.00469197	0.00557877	0	0	0.00473393	0	0	0	0	0	0
GPDA_STRGG Glycerol-3-phosphate dehydrogenase [NAD(P)+] OS=Streptomyces griseus subsp. griseus (strain JCM 4626 / NBRC 13350) GN=gpsA PE=3 SV=1	Streptomyces griseus subsp. griseus NBRC 13350	K00057	1.1.1.94		0	0.00469197	0	0	0	0	0	0	0	0	0	0
GPDA_NEOSM Glycerol-3-phosphate dehydrogenase [NAD(P)+] OS=Neorickettsia sennetsu (strain Miyayama) GN=gpsA PE=3 SV=1	Neorickettsia sennetsu str. Miyayama	K00057	1.1.1.94		0	0.00469197	0	0	0	0.00473393	0	0	0	0	0	0
GPDA_DESVV Glycerol-3-phosphate dehydrogenase [NAD(P)+] OS=Desulfovibrio vulgaris subsp. vulgaris (strain DP4) GN=gpsA PE=3 SV=1	Desulfovibrio vulgaris DP4	K00057	1.1.1.94		0	0	0	0	0	0	0	0	0	0	0	0
GPDA_ACIB3 Glycerol-3-phosphate dehydrogenase [NAD(P)+] OS=Acinetobacter baumannii (strain AB307-0294) GN=gpsA PE=3 SV=1	Acinetobacter baumannii	K00057	1.1.1.94		0	0	0	0	0	0	0	0	0	0	0	0
GPDA_VIBVU Glycerol-3-phosphate dehydrogenase [NAD(P)+] OS=Vibrio vulnificus (strain CMCP6) GN=gpsA PE=3 SV=1	Vibrio vulnificus CMCP6	K00057	1.1.1.94		0	0	0	0	0	0	0	0	0	0.0036735	0	0
DLD2_YEAST D-lactate dehydrogenase [cytochrome] 2, mitochondrial OS=Saccharomyces cerevisiae (strain ATCC 204508 / S288c) GN=DLD2 PE=1 SV=1	Saccharomyces cerevisiae S288c	K00102	1.1.2.4		0	0.00469197	0	0	0	0	0	0	0	0	0	0
GLO1_ORYSI Peroxisomal (S)-2-hydroxy-acid oxidase GLO1 OS=Oryza sativa subsp. indica GN=GLO1 PE=3 SV=1	Streptophyta	K11517	1.1.3.15		0	0	0	0	0	0	0	0	0	0	0	0
GLO5_ORYSJ Peroxisomal (S)-2-hydroxy-acid oxidase GLO5 OS=Oryza sativa subsp. japonica GN=GLO5 PE=2 SV=1	Streptophyta	-	1.1.3.15		0	0	0	0	0	0	0	0	0	0	0	0
GLO3_ORYSJ Peroxisomal (S)-2-hydroxy-acid oxidase GLO3 OS=Oryza sativa subsp. japonica GN=GLO3 PE=2 SV=1	Streptophyta	K11517	1.1.3.15		0	0	0	0	0	0	0	0	0	0	0	0
GOX_SPIOL Peroxisomal (S)-2-hydroxy-acid oxidase OS=Spinacia oleracea PE=1 SV=1	Streptophyta	K11517	1.1.3.15		0	0	0	0	0	0	0	0	0	0	0	0
GLPB_HAEPS Anaerobic glycerol-3-phosphate dehydrogenase subunit B OS=Haemophilus parasuis serovar 5 (strain SH0165) GN=glpB PE=3 SV=1	Haemophilus parasuis SH0165	K00112	1.1.5.3		0	0	0	0	0	0	0	0	0	0	0	0
MQO_MYCS2 Probable malate:quinone oxidoreductase OS=Mycobacterium smegmatis (strain ATCC 700084 / mc(2)155) GN=mqo PE=1 SV=1	Mycobacterium smegmatis str. MC2 155	K00116	1.1.5.4		0	0	0	0	0	0	0	0	0	0	0	0
MQO2_STAAR Probable malate:quinone oxidoreductase 2 OS=Staphylococcus aureus (strain MRSA252) GN=mqo2 PE=3 SV=1	Staphylococcus aureus subsp. aureus	K00116	1.1.5.4		0	0	0	0	0	0	0	0	0	0	0	0
MQO_XYLFA Probable malate:quinone oxidoreductase OS=Xylella fastidiosa (strain 9a5c) GN=mqo PE=3 SV=1	Xylella fastidiosa	K00116	1.1.5.4		0	0	0	0	0	0	0	0	0	0	0	0
ANSME_KLEPN Anaerobic sulfatase-maturating enzyme OS=Klebsiella pneumoniae GN=atsB PE=1 SV=1	Klebsiella pneumoniae	-	1.1.99.-		0	0	0	0	0	0	0	0	0	0	0.00365631	0
L2HDH_CAEEL L-2-hydroxyglutarate dehydrogenase, mitochondrial OS=Caenorhabditis elegans GN=Y45G12B.3 PE=3 SV=2	Caenorhabditis elegans	K00109	1.1.99.2		0	0	0	0	0	0	0	0	0	0.0036735	0	0
LAC5_ARATH Laccase-5 OS=Arabidopsis thaliana GN=LAC5 PE=2 SV=1	Arabidopsis thaliana	K05909	1.10.3.2		0	0	0	0	0	0	0	0	0	0	0	0
PSBA_ZYGCR Photosystem II protein D1 OS=Zygnema circumcarinatum GN=psbA PE=3 SV=1	root	-	1.10.3.9		0	0	0	0	0	0	0	0	0	0	0	0
PSBD_ZYGCR Photosystem II D2 protein OS=Zygnema circumcarinatum GN=psbD PE=3 SV=1	root	-	1.10.3.9		0	0	0	0	0	0	0	0	0	0	0	0
PSBA_AMPCA Photosystem II protein D1 OS=Amphidinium carterae GN=psbA PE=3 SV=1	root	-	1.10.3.9		0	0	0	0	0	0	0	0	0	0	0	0
UCRIA_WHEAT Cytochrome b6-f complex iron-sulfur subunit, chloroplastic OS=Triticum aestivum GN=petC PE=2 SV=1	Poaceae	-	1.10.9.1		0	0	0	0	0	0	0	0	0	0	0	0
UCRIA_ORYSJ Cytochrome b6-f complex iron-sulfur subunit, chloroplastic OS=Oryza sativa subsp. japonica GN=petC PE=1 SV=1	Poaceae	K02636	1.10.9.1		0	0	0	0	0	0	0	0	0	0	0	0
TPX_AQUAE Probable thiol peroxidase OS=Aquifex aeolicus (strain VF5) GN=tpx PE=1 SV=1	Aquifex aeolicus VF5	K11065	1.11.1.-		0	0	0	0	0	0	0	0	0	0	0	0
MG: Probable thiol peroxidase OS=Bacillus subtilis (strain 168) GN=tpx PE=1 SV=3 [P80864] Score: 189.0	Bacillus subtilis subsp. subtilis str. 168	K11065	1.11.1.-		0	0	0	0	0	0	0.00497934	0.00315507	0.0043262	0.0036735	0.00365631	0.0038276
TPX_ECOLI Thiol peroxidase OS=Escherichia coli (strain K12) GN=tpx PE=1 SV=2	Escherichia coli	K11065	1.11.1.-		0.0108372	0.0187679	0	0.00932484	0.0279799	0.0284036	0.00497934	0.0126203	0.00865239	0.0036735	0	0
YFEX_ECOLI Probable deferrochelatase/peroxidase YfeX OS=Escherichia coli (strain K12) GN=yfeX PE=1 SV=2	Escherichia coli K-12	K07223	1.11.1.-		0	0.00469197	0	0	0	0	0.00497934	0	0	0	0	0
TPX_YERPE Probable thiol peroxidase OS=Yersinia pestis GN=tpx PE=3 SV=1	Enterobacteriaceae	K11065	1.11.1.-		0.00541859	0.00938394	0	0.00466242	0.00932662	0.00946786	0	0	0.0043262	0	0	0
RRBR2_CLOAB Reverse rubrerythrin-2 OS=Clostridium acetobutylicum (strain ATCC 824 / DSM 792 / JCM 1419 / LMG 5710 / VKM B-1787) GN=rbr3B PE=1 SV=1	Clostridium acetobutylicum ATCC 824	-	1.11.1.1		0.0270929	0.0281518	0.0278938	0.0326369	0.0233165	0.0236696	0.0547727	0.0504811	0.0346096	0.0330615	0.0438757	0.0114828
RUBY2_CLOAB Rubrerythrin-2 OS=Clostridium acetobutylicum (strain ATCC 824 / DSM 792 / JCM 1419 / LMG 5710 / VKM B-1787) GN=rbr2 PE=2 SV=1	Clostridium acetobutylicum ATCC 824	-	1.11.1.1		0	0	0	0	0	0	0	0	0	0	0	0
AHPD_MYCA9 Alkyl hydroperoxide reductase AhpD OS=Mycobacterium abscessus (strain ATCC 19977 / DSM 44196 / CIP 104536 / JCM 13569 / NCTC 13031 / TMC 1543) GN=ahpD PE=3 SV=1	Mycobacterium abscessus ATCC 19977	-	1.11.1.15		0	0	0	0	0	0	0	0	0	0	0	0
AHPC_SALTY Alkyl hydroperoxide reductase subunit C OS=Salmonella typhimurium (strain LT2 / SGSC1412 / ATCC 700720) GN=ahpC PE=1 SV=2	Enterobacteriaceae	K03386	1.11.1.15		0.0270929	0.0422277	0.0167363	0.0326369	0.0279799	0.0236696	0.0995867	0.0851869	0.116807	0.066123	0.0658135	0.0535865
OSMC_ECOLI Peroxiredoxin OsmC OS=Escherichia coli (strain K12) GN=osmC PE=1 SV=2	Enterobacteriaceae	K04063	1.11.1.15		0	0	0	0	0	0	0.00497934	0.00315507	0.00865239	0	0	0
PRDX2_MOUSE Peroxiredoxin-2 OS=Mus musculus GN=Prdx2 PE=1 SV=3	Mus musculus	K03386	1.11.1.15		0	0	0	0	0	0	0	0	0	0	0	0
BAS1_ORYSJ 2-Cys peroxiredoxin BAS1, chloroplastic OS=Oryza sativa subsp. japonica GN=BAS1 PE=1 SV=1	Oryza sativa Japonica Group	K03386	1.11.1.15		0	0	0	0	0	0	0	0	0	0	0	0
PR2E2_ORYSJ Peroxiredoxin-2E-2, chloroplastic OS=Oryza sativa subsp. japonica GN=PRXIIE-2 PE=1 SV=1	Oryza sativa Japonica Group	-	1.11.1.15		0	0	0	0	0	0	0	0	0	0	0	0
PRX2C_ORYSJ Peroxiredoxin-2C OS=Oryza sativa subsp. japonica GN=PRXIIC PE=1 SV=1	Oryza sativa Japonica Group	-	1.11.1.15		0	0	0	0	0	0	0	0	0	0	0	0
PRXQ_WHEAT Peroxiredoxin Q, chloroplastic OS=Triticum aestivum GN=PRX1 PE=1 SV=1	Poaceae	-	1.11.1.15		0	0	0	0	0	0	0	0	0	0	0	0
BAS1_PINST Putative 2-Cys peroxiredoxin BAS1 (Fragments) OS=Pinus strobus PE=1 SV=1	Streptophyta	-	1.11.1.15		0	0	0	0	0	0	0	0	0	0	0	0
BAS1B_ARATH 2-Cys peroxiredoxin BAS1-like, chloroplastic OS=Arabidopsis thaliana GN=At5g06290 PE=2 SV=3	Streptophyta	K03386	1.11.1.15		0	0	0	0	0	0	0	0	0	0	0	0
BAS1_WHEAT 2-Cys peroxiredoxin BAS1, chloroplastic (Fragment) OS=Triticum aestivum GN=TSA PE=1 SV=2	Streptophyta	-	1.11.1.15		0	0	0	0	0	0	0	0	0	0	0	0
KATG_SHISS Catalase-peroxidase OS=Shigella sonnei (strain Ss046) GN=katG PE=3 SV=1	Enterobacteriaceae	K03782	1.11.1.21		0	0.00938394	0	0.0279745	0.0233165	0.0189357	0.0348554	0.0157754	0.0259572	0.007347	0.00365631	0
KATG_ASPCL Catalase-peroxidase OS=Aspergillus clavatus (strain ATCC 1007 / CBS 513.65 / DSM 816 / NCTC 3887 / NRRL 1) GN=katG PE=3 SV=1	Aspergillus clavatus NRRL 1	K03782	1.11.1.21		0	0	0	0	0	0	0	0	0	0	0	0
CATA_BOVIN Catalase OS=Bos taurus GN=CAT PE=1 SV=3	Bos taurus	K03781	1.11.1.6		0	0.00469197	0.0111575	0.00932484	0.00466331	0	0	0	0	0.0330615	0.0767824	0
CATA_HELAN Catalase OS=Helianthus annuus PE=2 SV=1	Streptophyta	-	1.11.1.6		0	0	0	0	0	0	0	0	0	0	0	0
CATA1_SOYBN Catalase-1/2 OS=Glycine max GN=CAT1 PE=2 SV=1	Streptophyta	-	1.11.1.6		0	0	0	0	0	0	0	0	0	0	0	0
CATA2_NICPL Catalase isozyme 2 OS=Nicotiana plumbaginifolia GN=CAT2 PE=2 SV=1	Streptophyta	-	1.11.1.6		0	0	0	0	0	0	0	0	0	0	0	0
CATA2_ORYSJ Catalase isozyme B OS=Oryza sativa subsp. japonica GN=CATB PE=2 SV=1	Streptophyta	-	1.11.1.6		0	0	0	0	0	0	0	0	0	0	0	0
PER_GINBI Peroxidase (Fragments) OS=Ginkgo biloba PE=1 SV=1	Ginkgo biloba	-	1.11.1.7		0	0	0	0	0.00466331	0	0	0	0	0	0	0
PER1_SORBI Cationic peroxidase SPC4 OS=Sorghum bicolor GN=Sb03g046810 PE=1 SV=2	Sorghum bicolor	K00430	1.11.1.7		0	0	0	0	0	0	0	0	0	0	0	0
PERX_WHEAT Peroxidase (Fragment) OS=Triticum aestivum PE=2 SV=1	Poaceae	-	1.11.1.7		0.00541859	0.00469197	0	0	0	0	0	0	0	0	0	0
PER40_ARATH Peroxidase 40 OS=Arabidopsis thaliana GN=PER40 PE=2 SV=2	Arabidopsis thaliana	K00430	1.11.1.7		0.0108372	0.00469197	0	0.00466242	0.00932662	0.00946786	0	0	0	0	0	0
PER72_ARATH Peroxidase 72 OS=Arabidopsis thaliana GN=PER72 PE=1 SV=1	Arabidopsis thaliana	K00430	1.11.1.7		0	0	0	0	0	0	0	0	0	0	0	0
PER16_ARATH Peroxidase 16 OS=Arabidopsis thaliana GN=PER16 PE=1 SV=2	Arabidopsis thaliana	K00430	1.11.1.7		0	0	0	0	0	0	0	0	0	0	0	0
PER62_ARATH Peroxidase 62 OS=Arabidopsis thaliana GN=PER62 PE=2 SV=1	Arabidopsis thaliana	K00430	1.11.1.7		0	0	0	0	0	0	0	0	0	0	0	0
PERP7_BRARR Peroxidase P7 OS=Brassica rapa subsp. rapa PE=1 SV=3	Brassicaceae	-	1.11.1.7		0.0162558	0.0140759	0	0.00932484	0.0139899	0.0142018	0	0	0	0	0	0
PERA2_ARMRU Peroxidase A2 OS=Armoracia rusticana GN=HRPA2 PE=1 SV=1	Brassicaceae	K00430	1.11.1.7		0.00541859	0.00938394	0	0	0.00466331	0	0	0	0	0	0	0
PERX_SOLTU Suberization-associated anionic peroxidase OS=Solanum tuberosum PE=2 SV=2	Solanales	-	1.11.1.7		0.0162558	0.0140759	0	0.00932484	0.0139899	0.0142018	0	0	0	0	0	0
PER1_MAIZE Peroxidase 1 OS=Zea mays GN=PER1 PE=1 SV=1	Streptophyta	K00430	1.11.1.7		0.0325115	0.0234599	0.0111575	0.0279745	0.0233165	0.0189357	0	0	0.0043262	0.007347	0.00731261	0
PER66_MAIZE Peroxidase 66 OS=Zea mays GN=PER66 PE=1 SV=1	Streptophyta	K00430	1.11.1.7		0.0704416	0.0750716	0.00557877	0.055949	0.0559597	0.0568072	0	0	0.0043262	0.007347	0.00731261	0
PER22_ARATH Peroxidase 22 OS=Arabidopsis thaliana GN=PER22 PE=1 SV=2	Streptophyta	-	1.11.1.7		0.0162558	0.00938394	0.00557877	0.0186497	0.00932662	0.00946786	0	0	0.0043262	0.007347	0.00731261	0
MG: Iron hydrogenase 1 OS=Clostridium pasteurianum PE=1 SV=1 [P29166] Score: 111.0	Clostridium pasteurianum	-	1.12.7.2		0	0	0	0	0	0	0.00497934	0.00315507	0.0043262	0.0036735	0.00365631	0
MG: Hydrogenase-2 large chain OS=Escherichia coli O157:H7 GN=hybC PE=3 SV=2 [P0ACE1] Score: 796.0	Enterobacteriaceae	K06281	1.12.99.6		0	0	0	0	0	0	0	0.00631014	0	0	0	0
MBHL_SHIFL Hydrogenase-1 large chain OS=Shigella flexneri GN=hyaB PE=3 SV=1	Enterobacteriaceae	K06281	1.12.99.6		0	0	0	0	0	0	0	0	0	0	0	0
MTND3_CAEBR 1,2-dihydroxy-3-keto-5-methylthiopentene dioxygenase homolog 3 OS=Caenorhabditis briggsae GN=CBG13458 PE=3 SV=1	Caenorhabditis briggsae	-	1.13.11.-		0	0	0	0	0	0	0	0	0.0043262	0	0	0
MHPB_XANP2 2,3-dihydroxyphenylpropionate/2,3-dihydroxicinnamic acid 1,2-dioxygenase OS=Xanthobacter autotrophicus (strain ATCC BAA-1158 / Py2) GN=mhpB PE=3 SV=1	Xanthobacter autotrophicus Py2	K05713	1.13.11.16		0	0	0	0	0.00466331	0	0	0	0	0	0	0
LOX3_SOYBN Seed linoleate 9S-lipoxygenase-3 OS=Glycine max GN=LOX1.3 PE=1 SV=1	Glycine max	K15718	1.13.11.58		0.0108372	0.00469197	0	0	0	0	0	0	0	0	0	0
PPOA_ASPFC Psi-producing oxygenase A OS=Neosartorya fumigata (strain CEA10 / CBS 144.89 / FGSC A1163) GN=ppoA PE=3 SV=1	Aspergillus fumigatus A1163	-	1.13.11.60 5.4.4.5		0	0	0	0	0	0	0	0	0	0	0	0
BCDO2_MOUSE Beta,beta-carotene 9,10-oxygenase OS=Mus musculus GN=Bco2 PE=1 SV=1	Mus musculus	K10252	1.13.11.71		0	0	0	0	0	0	0	0	0	0	0	0
CP6K1_BLAGE Cytochrome P450 6k1 OS=Blattella germanica GN=CYP6K1 PE=2 SV=1	Blattella germanica	-	1.14.-.-		0	0	0	0	0	0	0	0	0	0	0	0
C12C1_DROME Probable cytochrome P450 12c1, mitochondrial OS=Drosophila melanogaster GN=Cyp12c1 PE=2 SV=2	Drosophila melanogaster	K15004	1.14.-.-		0	0	0.00557877	0	0	0	0	0	0	0	0	0
CP6V1_DROME Probable cytochrome P450 6v1 OS=Drosophila melanogaster GN=Cyp6v1 PE=2 SV=1	Drosophila melanogaster	K14999	1.14.-.-		0	0	0	0	0	0	0	0	0	0	0	0
THAD_ARATH Cytochrome P450 705A5 OS=Arabidopsis thaliana GN=CYP705A5 PE=2 SV=1	Arabidopsis thaliana	-	1.14.-.-		0	0	0	0	0	0	0	0	0	0	0	0
C71BG_ARATH Cytochrome P450 71B16 OS=Arabidopsis thaliana GN=CYP71B16 PE=3 SV=1	Arabidopsis thaliana	K00517	1.14.-.-		0	0	0	0	0	0	0	0	0	0.0036735	0	0
C71AJ_ARATH Cytochrome P450 71A19 OS=Arabidopsis thaliana GN=CYP71A19 PE=2 SV=1	Arabidopsis thaliana	-	1.14.-.-		0	0	0	0	0	0	0.00497934	0	0	0	0	0
OGFD3_RAT 2-oxoglutarate and iron-dependent oxygenase domain-containing protein 3 OS=Rattus norvegicus GN=Ogfod3 PE=2 SV=1	Muridae	-	1.14.11.-		0	0	0	0	0	0	0	0	0.0043262	0	0	0
ROXA_ECOLI 50S ribosomal protein L16 3-hydroxylase OS=Escherichia coli (strain K12) GN=roxA PE=1 SV=2	Escherichia coli K-12	K18850	1.14.11.47		0	0	0	0	0	0	0	0	0	0	0	0
CP4V2_HUMAN Cytochrome P450 4V2 OS=Homo sapiens GN=CYP4V2 PE=1 SV=2	Homo sapiens	K07427	1.14.13.- 1.14.13.199		0	0	0	0	0	0	0	0	0	0	0	0
C71DK_TOBAC 5-epiaristolochene 1,3-dihydroxylase OS=Nicotiana tabacum GN=CYP71D20 PE=1 SV=2	Nicotiana tabacum	K15805	1.14.13.119		0	0	0	0	0	0	0	0	0	0	0	0
MHPA_MYCGI 3-(3-hydroxy-phenyl)propionate/3-hydroxycinnamic acid hydroxylase OS=Mycobacterium gilvum (strain PYR-GCK) GN=mhpA PE=3 SV=1	Mycobacterium gilvum PYR-GCK	K05712	1.14.13.127		0	0	0	0	0	0	0	0	0	0	0	0
C99A3_ORYSJ 9-beta-pimara-7,15-diene oxidase OS=Oryza sativa subsp. japonica GN=CYP99A3 PE=1 SV=1	Oryza sativa Japonica Group	K16085	1.14.13.144		0	0	0	0	0	0	0	0	0	0	0	0
CP4AO_PIG Cytochrome P450 4A24 OS=Sus scrofa GN=CYP4A24 PE=2 SV=1	Sus scrofa	-	1.14.13.205		0	0	0	0	0	0	0	0	0	0	0.00365631	0
KMO_RAT Kynurenine 3-monooxygenase OS=Rattus norvegicus GN=Kmo PE=1 SV=1	Rattus norvegicus	K00486	1.14.13.9		0	0	0	0	0	0	0	0	0	0	0	0
CP17A_CAVPO Steroid 17-alpha-hydroxylase/17,20 lyase OS=Cavia porcellus GN=CYP17A1 PE=1 SV=1	Cavia porcellus	-	1.14.14.19 4.1.2.30		0	0	0	0	0	0	0	0	0	0	0	0
LUXB1_PHOLU Alkanal monooxygenase beta chain OS=Photorhabdus luminescens GN=luxB PE=3 SV=1	Photorhabdus luminescens	-	1.14.14.3		0	0	0	0	0	0	0	0	0	0	0	0
TYRO_STRGB Tyrosinase OS=Streptomyces galbus GN=melC2 PE=3 SV=2	Streptomyces galbus	-	1.14.18.1		0	0	0	0	0	0	0	0	0	0	0	0
FD6E2_SOYBN Omega-6 fatty acid desaturase, endoplasmic reticulum isozyme 2 OS=Glycine max GN=FAD2-2 PE=2 SV=1	Glycine max	K10256	1.14.19.-		0.00541859	0	0	0	0	0	0	0	0	0	0	0
MG: Superoxide dismutase [Mn] OS=Geobacillus stearothermophilus GN=sodA PE=1 SV=2 [P00449] Score: 199.0	Geobacillus stearothermophilus	-	1.15.1.1		0.00541859	0.00469197	0.00557877	0.00466242	0.00466331	0.00473393	0	0.00315507	0	0	0	0
SODM_LACLM Superoxide dismutase [Mn] OS=Lactococcus lactis subsp. cremoris (strain MG1363) GN=sodA PE=3 SV=1	Lactococcus lactis	K04564	1.15.1.1		0	0	0	0	0	0	0	0	0	0	0	0
SODM_STRAY Superoxide dismutase [Mn/Fe] (Fragment) OS=Streptococcus alactolyticus GN=sodA PE=3 SV=1	Streptococcus alactolyticus	-	1.15.1.1		0	0	0	0	0	0	0	0	0	0	0	0
SODF_SALTI Superoxide dismutase [Fe] OS=Salmonella typhi GN=sodB PE=3 SV=2	Enterobacteriaceae	K04564	1.15.1.1		0	0.00469197	0	0.00466242	0.0233165	0.0189357	0.014938	0.00631014	0.0129786	0.007347	0.00731261	0.00765521
SODM_YEREN Superoxide dismutase [Mn] OS=Yersinia enterocolitica GN=sodA PE=3 SV=1	Enterobacteriaceae	K04564	1.15.1.1		0.00541859	0.00938394	0	0.00932484	0.00932662	0.00946786	0.00995867	0.00946522	0.021631	0.007347	0.00365631	0.0114828
SODC_BOMMO Superoxide dismutase [Cu-Zn] OS=Bombyx mori PE=1 SV=3	Bombyx mori	K04565	1.15.1.1		0.0270929	0.0328438	0	0.0186497	0.0186532	0.0189357	0	0	0	0.0036735	0.00365631	0.0038276
SODC_MACMU Superoxide dismutase [Cu-Zn] OS=Macaca mulatta GN=SOD1 PE=2 SV=3	Mammalia	K04565	1.15.1.1		0	0	0	0	0	0	0	0	0	0	0	0
SODC_PIG Superoxide dismutase [Cu-Zn] OS=Sus scrofa GN=SOD1 PE=1 SV=2	Mammalia	K04565	1.15.1.1		0	0	0	0	0	0	0	0	0	0	0	0
SODC_CHICK Superoxide dismutase [Cu-Zn] OS=Gallus gallus GN=SOD1 PE=1 SV=3	Chordata	K04565	1.15.1.1		0.0216743	0.0187679	0	0.0186497	0.0186532	0.0189357	0	0	0	0.0036735	0.00365631	0.0038276
SODC_PRIGL Superoxide dismutase [Cu-Zn] OS=Prionace glauca GN=sod1 PE=1 SV=1	Chordata	-	1.15.1.1		0.0216743	0.0187679	0	0.0186497	0.0186532	0.0189357	0	0	0	0.0036735	0.00365631	0.0038276
SODC_BOVIN Superoxide dismutase [Cu-Zn] OS=Bos taurus GN=SOD1 PE=1 SV=2	Chordata	K04565	1.15.1.1		0.0216743	0.0187679	0	0.0186497	0.0186532	0.0189357	0	0	0	0.0036735	0.00365631	0.0038276
SODF_PLAVI Superoxide dismutase [Fe] OS=Plasmodium vivax GN=SODB PE=3 SV=1	Plasmodium vivax	-	1.15.1.1		0	0	0	0	0	0	0	0	0.0043262	0	0	0
SODC_ASPJA Superoxide dismutase [Cu-Zn] (Fragment) OS=Aspergillus japonicus GN=sodC PE=3 SV=1	Eukaryota	-	1.15.1.1		0.00541859	0.0140759	0	0	0	0	0	0	0	0	0	0
SODC5_MAIZE Superoxide dismutase [Cu-Zn] 4AP OS=Zea mays GN=SODCC.2 PE=2 SV=2	Eukaryota	K04565	1.15.1.1		0.00541859	0.0140759	0	0	0	0	0	0	0	0	0	0
SODC_CARPA Superoxide dismutase [Cu-Zn] OS=Carica papaya GN=SODCC PE=2 SV=1	Eukaryota	-	1.15.1.1		0.00541859	0.0140759	0	0	0	0	0	0	0	0	0	0
SODC2_ORYSJ Superoxide dismutase [Cu-Zn] 2 OS=Oryza sativa subsp. japonica GN=SODCC2 PE=1 SV=2	Eukaryota	K04565	1.15.1.1		0.00541859	0.0140759	0	0	0	0	0	0	0	0	0	0
SODC_ANACO Superoxide dismutase [Cu-Zn] OS=Ananas comosus GN=SOD1 PE=2 SV=1	Eukaryota	-	1.15.1.1		0.00541859	0.0140759	0	0	0	0	0	0	0	0	0	0
SODC4_MAIZE Superoxide dismutase [Cu-Zn] 4A OS=Zea mays GN=SODCC.3 PE=2 SV=2	Eukaryota	K04565	1.15.1.1		0.00541859	0.0140759	0	0	0	0	0	0	0	0	0	0
SODCP_ZANAE Superoxide dismutase [Cu-Zn], chloroplastic OS=Zantedeschia aethiopica GN=SODCP PE=2 SV=1	Eukaryota	K04565	1.15.1.1		0.0270929	0.0375358	0	0	0	0	0	0	0	0	0	0
SODM4_MAIZE Superoxide dismutase [Mn] 3.4, mitochondrial OS=Zea mays GN=SODA.3 PE=2 SV=1	Poaceae	-	1.15.1.1		0	0	0	0	0	0	0	0	0	0	0	0
SODM_ORYSJ Superoxide dismutase [Mn], mitochondrial OS=Oryza sativa subsp. japonica GN=SODA PE=2 SV=2	Poaceae	K04564	1.15.1.1		0	0	0	0	0	0	0	0	0	0	0	0
NEC1_NICLS Nectarin-1 OS=Nicotiana langsdorffii x Nicotiana sanderae GN=NECI PE=1 SV=1	Nicotiana langsdorffii x Nicotiana sanderae	-	1.15.1.1		0.0162558	0.0281518	0	0.0466242	0.0139899	0.0236696	0	0	0	0	0	0
DPS_STRMG DNA protection during starvation protein OS=Streptococcus mutans GN=dps PE=1 SV=3	Streptococcus mutans	-	1.16.-.-		0.0108372	0	0	0	0.00466331	0.00473393	0.029876	0.0347058	0.0259572	0.0257145	0.0329068	0.0535865
DPS_ERWT9 DNA protection during starvation protein OS=Erwinia tasmaniensis (strain DSM 17950 / CIP 109463 / Et1/99) GN=dps PE=3 SV=1	Enterobacteriaceae	K04047	1.16.-.-		0.173395	0.164219	0.0446302	0.298395	0.275135	0.165688	0.288801	0.242941	0.27255	0.124899	0.175503	0.153104
DPS_KLUCR DNA protection during starvation protein OS=Kluyvera cryocrescens GN=dps PE=3 SV=1	Enterobacteriaceae	K04047	1.16.-.-		0.211325	0.243983	0.0948391	0.345019	0.345085	0.302971	0.438182	0.362833	0.410989	0.194695	0.212066	0.195208
FRE5_YEAST Ferric reductase transmembrane component 5 OS=Saccharomyces cerevisiae (strain ATCC 204508 / S288c) GN=FRE5 PE=2 SV=1	Saccharomyces cerevisiae S288c	K00521	1.16.1.9		0.0108372	0.00469197	0	0.00932484	0.00466331	0.00946786	0	0	0	0	0	0
BFR_SALTY Bacterioferritin OS=Salmonella typhimurium (strain LT2 / SGSC1412 / ATCC 700720) GN=bfr PE=3 SV=1	Proteobacteria	-	1.16.3.1		0.0108372	0.0281518	0.00557877	0.0466242	0.0373065	0.0331375	0.0248967	0.0189304	0.021631	0.0110205	0.0109689	0
FRIH3_XENLA Ferritin heavy chain, oocyte isoform OS=Xenopus laevis PE=1 SV=1	Chordata	-	1.16.3.1		0	0	0	0	0	0	0.00995867	0.00631014	0	0	0.00731261	0
FRIH_CHICK Ferritin heavy chain OS=Gallus gallus GN=FTH PE=2 SV=2	Chordata	K00522	1.16.3.1		0	0	0	0	0	0	0.00995867	0.00631014	0	0	0.00731261	0
FRIH_FELCA Ferritin heavy chain OS=Felis catus GN=FTH1 PE=2 SV=3	Chordata	K00522	1.16.3.1		0	0	0	0	0	0	0.00995867	0.00631014	0	0	0.00731261	0
FRIH_PONAB Ferritin heavy chain OS=Pongo abelii GN=FTH1 PE=2 SV=3	Chordata	K00522	1.16.3.1		0	0	0	0	0	0	0.00995867	0.00631014	0	0	0.00731261	0
FRIH_HUMAN Ferritin heavy chain OS=Homo sapiens GN=FTH1 PE=1 SV=2	Chordata	K00522	1.16.3.1		0	0	0	0	0	0	0.00995867	0.00631014	0	0	0.00731261	0
FRI_MALBX Ferritin, chloroplastic OS=Malus baccata var. xiaojinensis PE=3 SV=1	Malus xiaojinensis	-	1.16.3.1		0	0	0.00557877	0	0	0	0	0	0	0.0036735	0	0
FRI4_SOYBN Ferritin-4, chloroplastic OS=Glycine max PE=1 SV=2	Streptophyta	K00522	1.16.3.1		0	0	0.00557877	0	0	0	0	0	0	0	0	0
FRI2_VIGUN Ferritin-2, chloroplastic OS=Vigna unguiculata GN=PFE2 PE=2 SV=2	Streptophyta	-	1.16.3.1		0	0	0.00557877	0	0	0	0	0	0	0	0	0
FTNA_SHIFL Bacterial non-heme ferritin OS=Shigella flexneri GN=ftnA PE=3 SV=1	Enterobacteriaceae	K02217	1.16.3.2		0.00541859	0.00469197	0.0111575	0.00466242	0.0139899	0.00946786	0.014938	0.0157754	0.00865239	0	0.00365631	0
DAPB_CLOBA 4-hydroxy-tetrahydrodipicolinate reductase OS=Clostridium botulinum (strain Alaska E43 / Type E3) GN=dapB PE=3 SV=1	Clostridium botulinum	K00215	1.17.1.8		0	0	0	0	0	0	0.0199173	0.0157754	0.021631	0.007347	0.00731261	0.00765521
DAPB_ACICJ 4-hydroxy-tetrahydrodipicolinate reductase OS=Acidiphilium cryptum (strain JF-5) GN=dapB PE=3 SV=1	Acidiphilium cryptum JF-5	K00215	1.17.1.8		0	0	0	0	0	0	0.00497934	0	0.00865239	0.007347	0.00365631	0.0038276
DAPB_KLEP7 4-hydroxy-tetrahydrodipicolinate reductase OS=Klebsiella pneumoniae subsp. pneumoniae (strain ATCC 700721 / MGH 78578) GN=dapB PE=3 SV=1	Enterobacteriaceae	K00215	1.17.1.8		0	0	0.0111575	0.00932484	0	0	0	0	0	0	0	0
RTPR_LACH4 Adenosylcobalamin-dependent ribonucleoside-triphosphate reductase OS=Lactobacillus helveticus (strain DPC 4571) GN=rtpR PE=3 SV=1	Lactobacillus helveticus DPC 4571	K00527	1.17.4.2		0	0	0	0	0	0	0	0	0	0	0	0
ISPG_ORYSJ 4-hydroxy-3-methylbut-2-en-1-yl diphosphate synthase (ferredoxin), chloroplastic OS=Oryza sativa subsp. japonica GN=ISPG PE=2 SV=1	Oryza sativa Japonica Group	K03526	1.17.7.1		0	0	0	0	0	0	0	0	0	0.0036735	0	0
ISPG_SINMW 4-hydroxy-3-methylbut-2-en-1-yl diphosphate synthase (flavodoxin) OS=Sinorhizobium medicae (strain WSM419) GN=ispG PE=3 SV=1	Sinorhizobium medicae WSM419	K03526	1.17.7.3		0	0	0	0	0	0	0	0	0	0	0	0
ISPG_CHRSD 4-hydroxy-3-methylbut-2-en-1-yl diphosphate synthase (flavodoxin) OS=Chromohalobacter salexigens (strain DSM 3043 / ATCC BAA-138 / NCIMB 13768) GN=ispG PE=3 SV=1	Chromohalobacter salexigens DSM 3043	K03526	1.17.7.3		0	0	0	0	0	0	0	0	0	0	0.00365631	0
ISPG_MYCPE 4-hydroxy-3-methylbut-2-en-1-yl diphosphate synthase (flavodoxin) OS=Mycoplasma penetrans (strain HF-2) GN=ispG PE=3 SV=1	Mycoplasma penetrans HF-2	K03526	1.17.7.3		0	0	0	0	0	0	0	0	0	0	0	0
MG: 4-hydroxy-3-methylbut-2-enyl diphosphate reductase OS=Clostridium acetobutylicum (strain ATCC 824 / DSM 792 / JCM 1419 / LMG 5710 / VKM B-1787) GN=ispH PE=3 SV=1 [Q97I09] Score: 313.0	Clostridium acetobutylicum ATCC 824	K02945 K03527	1.17.7.4		0	0	0	0	0	0	0.00497934	0	0.0043262	0.0036735	0.00365631	0
MG: 4-hydroxy-3-methylbut-2-enyl diphosphate reductase OS=Clostridium perfringens (strain 13 / Type A) GN=ispH PE=3 SV=1 [P58675] Score: 344.0	Clostridium perfringens str. 13	K03527	1.17.7.4		0	0	0	0	0	0	0	0	0	0	0	0
QUEG_YERPE Epoxyqueuosine reductase OS=Yersinia pestis GN=queG PE=3 SV=1	Yersinia pestis	K18979	1.17.99.6		0	0	0	0	0	0	0.00497934	0	0	0	0	0
FENR_LACPL Ferredoxin--NADP reductase OS=Lactobacillus plantarum (strain ATCC BAA-793 / NCIMB 8826 / WCFS1) GN=lp_2585 PE=3 SV=1	Lactobacillus plantarum WCFS1	K00384	1.18.1.2		0	0	0	0	0	0	0	0	0	0	0	0
FENR_ACICJ Ferredoxin--NADP reductase OS=Acidiphilium cryptum (strain JF-5) GN=Acry_1452 PE=3 SV=1	Acidiphilium cryptum JF-5	K00384	1.18.1.2		0	0	0	0	0	0	0	0	0	0	0.00365631	0
FENR_VICFA Ferredoxin--NADP reductase, chloroplastic OS=Vicia faba GN=PETH PE=2 SV=1	Streptophyta	-	1.18.1.2		0	0	0	0	0	0	0	0	0	0	0	0
FENR_IMPCY Ferredoxin--NADP reductase, chloroplastic (Fragments) OS=Imperata cylindrica PE=1 SV=1	Streptophyta	-	1.18.1.2		0	0	0	0	0	0	0	0	0	0	0	0
NIFD_CYAA5 Nitrogenase molybdenum-iron protein alpha chain OS=Cyanothece sp. (strain ATCC 51142) GN=nifD PE=3 SV=1	Cyanothece sp. ATCC 51142	K02586	1.18.6.1		0	0	0	0	0	0	0	0	0	0	0	0
PS5_PINST Putative NAD(P)-dependent glyceraldehyde-3-phosphate dehydrogenase PS5 (Fragments) OS=Pinus strobus PE=1 SV=1	Pinus strobus	-	1.2.1.-		0	0	0	0	0	0	0	0	0	0	0	0
ARGC_SULSO N-acetyl-gamma-glutamyl-phosphate/N-acetyl-gamma-aminoadipyl-phosphate reductase OS=Sulfolobus solfataricus (strain ATCC 35092 / DSM 1617 / JCM 11322 / P2) GN=argC PE=3 SV=1	Sulfolobus solfataricus P2	K05829	1.2.1.- 1.2.1.38		0	0	0	0	0	0	0	0	0	0	0	0
MG: Aspartate-semialdehyde dehydrogenase OS=Aquifex aeolicus (strain VF5) GN=asd PE=3 SV=1 [O67716] Score: 364.0	Aquifex aeolicus VF5	K00133	1.2.1.11		0	0	0	0	0	0	0.00497934	0.00315507	0.0043262	0.0036735	0	0
DHAS_SHIFL Aspartate-semialdehyde dehydrogenase OS=Shigella flexneri GN=asd PE=3 SV=1	Enterobacteriaceae	K00133	1.2.1.11		0	0	0	0	0	0	0	0	0	0	0	0
MG: Aspartate-semialdehyde dehydrogenase OS=Legionella pneumophila GN=asd PE=3 SV=1 [O31219] Score: 90.5	Legionella pneumophila	-	1.2.1.11		0	0	0	0	0	0	0.00497934	0.00315507	0.0043262	0	0	0
G3P_LACDT Glyceraldehyde-3-phosphate dehydrogenase (Fragment) OS=Lactarius deterrimus GN=GPD PE=3 SV=1	Lactarius deliciosus var. deterrimus	-	1.2.1.12		0	0	0	0	0	0	0	0	0.0043262	0	0	0
G3PP2_ARATH Glyceraldehyde-3-phosphate dehydrogenase GAPCP2, chloroplastic OS=Arabidopsis thaliana GN=GAPCP2 PE=2 SV=1	root	K00134	1.2.1.12		0.0433487	0.0375358	0.0446302	0.0466242	0.0466331	0.0426054	0.029876	0.0315507	0.0302834	0.0257145	0.0292505	0.0306208
G3PC_LEIME Glyceraldehyde-3-phosphate dehydrogenase, cytosolic OS=Leishmania mexicana GN=GAPC PE=3 SV=3	root	-	1.2.1.12		0.0487673	0.0422277	0.0446302	0.0652738	0.0652863	0.0568072	0.029876	0.0220855	0.0173048	0.0257145	0.0292505	0.0344484
G3P_NAEFO Glyceraldehyde-3-phosphate dehydrogenase (Fragment) OS=Naegleria fowleri PE=1 SV=1	root	-	1.2.1.12		0.0216743	0.0140759	0.0223151	0.0186497	0.0186532	0.0189357	0.0199173	0.0157754	0.0129786	0.014694	0.0146252	0.0229656
G3P_PHANO Glyceraldehyde-3-phosphate dehydrogenase OS=Phaeosphaeria nodorum (strain SN15 / ATCC MYA-4574 / FGSC 10173) GN=GPD1 PE=3 SV=1	root	K00134	1.2.1.12		0.0704416	0.0703796	0.0613665	0.0792611	0.0746129	0.0615411	0.029876	0.0315507	0.0259572	0.0257145	0.0292505	0.0267932
G3P3_NOSS1 Glyceraldehyde-3-phosphate dehydrogenase 3 OS=Nostoc sp. (strain PCC 7120 / UTEX 2576) GN=gap3 PE=2 SV=1	root	K00134	1.2.1.12		0.0216743	0.0140759	0.0223151	0.0186497	0.0186532	0.0189357	0.0199173	0.0157754	0.0129786	0.014694	0.0146252	0.0229656
G3P1_GLORO Glyceraldehyde-3-phosphate dehydrogenase 1 (Fragment) OS=Globodera rostochiensis GN=GPD-1 PE=2 SV=1	root	-	1.2.1.12		0.0216743	0.0140759	0.0223151	0.0186497	0.0186532	0.0189357	0.0199173	0.0157754	0.0129786	0.014694	0.0146252	0.0229656
G3P_PONAB Glyceraldehyde-3-phosphate dehydrogenase OS=Pongo abelii GN=GAPDH PE=2 SV=3	root	K00134	1.2.1.12		0.0216743	0.0140759	0.0223151	0.0186497	0.0186532	0.0189357	0.0248967	0.0189304	0.0129786	0.0257145	0.0219378	0.0267932
G3P_SHIBC Glyceraldehyde-3-phosphate dehydrogenase OS=Shimwellia blattae (strain ATCC 29907 / DSM 4481 / JCM 1650 / NBRC 105725 / CDC 9005-74) GN=gapA PE=3 SV=1	root	K00134	1.2.1.12		0.178813	0.173603	0.161784	0.251771	0.233165	0.227229	0.0647314	0.0504811	0.0735453	0.044082	0.0511883	0.0727245
G3P_BRUMA Glyceraldehyde-3-phosphate dehydrogenase OS=Brugia malayi GN=G3PD PE=1 SV=1	root	-	1.2.1.12		0.0216743	0.0140759	0.0223151	0.0186497	0.0186532	0.0189357	0.0199173	0.0157754	0.0129786	0.014694	0.0146252	0.0229656
MG: Glyceraldehyde-3-phosphate dehydrogenase OS=Lactobacillus delbrueckii subsp. bulgaricus GN=gap PE=3 SV=1 [O32755] Score: 473.0	root	-	1.2.1.12		0.162558	0.117299	0.111575	0.163185	0.153889	0.151486	0.14938	0.145133	0.138438	0.113878	0.13894	0.179897
G3P_STRAU Glyceraldehyde-3-phosphate dehydrogenase OS=Streptomyces aureofaciens GN=gap PE=3 SV=1	root	-	1.2.1.12		0.0216743	0.0140759	0.0223151	0.0186497	0.0186532	0.0189357	0.0199173	0.0157754	0.0129786	0.014694	0.0146252	0.0229656
G3P_HALVA Glyceraldehyde-3-phosphate dehydrogenase OS=Haloarcula vallismortis GN=gap PE=3 SV=1	root	K00134	1.2.1.12		0.0216743	0.0140759	0.0223151	0.0186497	0.0186532	0.0189357	0.0199173	0.0157754	0.0129786	0.014694	0.0146252	0.0229656
G3PC_PETCR Glyceraldehyde-3-phosphate dehydrogenase, cytosolic OS=Petroselinum crispum GN=GAPC PE=2 SV=1	root	-	1.2.1.12		0.200488	0.211139	0.172942	0.298395	0.270472	0.2651	0.0796694	0.0504811	0.0865239	0.058776	0.0621572	0.0880349
G3P_RALSO Glyceraldehyde-3-phosphate dehydrogenase OS=Ralstonia solanacearum (strain GMI1000) GN=gapA PE=3 SV=2	root	K00134	1.2.1.12		0.0541859	0.0422277	0.0502089	0.0979108	0.0886029	0.0804768	0.044814	0.0283956	0.043262	0.051429	0.0438757	0.0612417
G3P_SEROD Glyceraldehyde-3-phosphate dehydrogenase (Fragment) OS=Serratia odorifera GN=gap PE=3 SV=1	root	-	1.2.1.12		0.0162558	0.0140759	0.0223151	0.0186497	0.0186532	0.0142018	0.00995867	0.0157754	0.0129786	0.0110205	0.0146252	0.0038276
G3PT_RAT Glyceraldehyde-3-phosphate dehydrogenase, testis-specific OS=Rattus norvegicus GN=Gapdhs PE=1 SV=1	root	K10705	1.2.1.12		0.0162558	0.0140759	0.0167363	0.0186497	0.0186532	0.0142018	0.00995867	0.0157754	0.00865239	0.007347	0.0109689	0.0038276
G3PT_HUMAN Glyceraldehyde-3-phosphate dehydrogenase, testis-specific OS=Homo sapiens GN=GAPDHS PE=1 SV=2	root	K10705	1.2.1.12		0.0162558	0.0140759	0.0167363	0.0186497	0.0186532	0.0142018	0.00995867	0.0157754	0.00865239	0.007347	0.0109689	0.0038276
G3P2_SYNY3 Glyceraldehyde-3-phosphate dehydrogenase 2 OS=Synechocystis sp. (strain PCC 6803 / Kazusa) GN=gap2 PE=1 SV=3	Synechocystis sp. PCC 6803 substr. Kazusa	K00150	1.2.1.12 1.2.1.59		0.00541859	0	0	0	0	0	0	0	0	0	0	0.019138
G3PA_GRAGA Glyceraldehyde-3-phosphate dehydrogenase, chloroplastic OS=Gracilaria gracilis GN=GAPA PE=2 SV=1	Gracilaria gracilis	-	1.2.1.13		0	0	0	0	0	0	0.0199173	0	0.021631	0	0	0
G3PB_PEA Glyceraldehyde-3-phosphate dehydrogenase B, chloroplastic OS=Pisum sativum GN=GAPB PE=2 SV=2	root	-	1.2.1.13		0	0	0	0	0	0	0	0	0	0	0	0
ALDH_DAVTA Aldehyde dehydrogenase OS=Davidiella tassiana GN=CLAH10 PE=1 SV=2	Davidiella tassiana	-	1.2.1.3		0	0	0	0	0	0	0	0	0	0	0	0
ALDH_EMENI Aldehyde dehydrogenase OS=Emericella nidulans (strain FGSC A4 / ATCC 38163 / CBS 112.46 / NRRL 194 / M139) GN=aldA PE=3 SV=2	Aspergillus nidulans FGSC A4	K00128	1.2.1.3		0	0	0	0	0	0	0	0	0	0	0	0
AL9A1_ORYLA Aldehyde dehydrogenase family 9 member A1 OS=Oryzias latipes GN=aldh9A1 PE=2 SV=1	Oryzias latipes	K00149	1.2.1.3		0	0	0	0	0	0	0	0	0	0	0	0
AL2B7_ARATH Aldehyde dehydrogenase family 2 member B7, mitochondrial OS=Arabidopsis thaliana GN=ALDH2B7 PE=2 SV=2	Arabidopsis thaliana	K00128	1.2.1.3		0	0	0	0	0	0	0	0	0	0	0	0
ARGC_LISW6 N-acetyl-gamma-glutamyl-phosphate reductase OS=Listeria welshimeri serovar 6b (strain ATCC 35897 / DSM 20650 / SLCC5334) GN=argC PE=3 SV=1	Listeria welshimeri serovar 6b str. SLCC5334	K00145	1.2.1.38		0	0	0	0	0	0	0	0	0.0043262	0	0	0
PROA_METMA Gamma-glutamyl phosphate reductase OS=Methanosarcina mazei (strain ATCC BAA-159 / DSM 3647 / Goe1 / Go1 / JCM 11833 / OCM 88) GN=proA PE=3 SV=1	Methanosarcina mazei Go1	K00147	1.2.1.41		0	0	0	0	0	0	0	0.00315507	0	0	0	0
PROA_MYCSJ Gamma-glutamyl phosphate reductase OS=Mycobacterium sp. (strain JLS) GN=proA PE=3 SV=1	Mycobacterium	K00147	1.2.1.41		0	0	0	0	0	0.00473393	0	0	0	0	0	0
PROA_HYDS0 Gamma-glutamyl phosphate reductase OS=Hydrogenobaculum sp. (strain Y04AAS1) GN=proA PE=3 SV=1	Hydrogenobaculum sp. Y04AAS1	K00147	1.2.1.41		0	0	0	0	0	0	0	0	0	0	0	0
PROA_THET2 Gamma-glutamyl phosphate reductase OS=Thermus thermophilus (strain HB27 / ATCC BAA-163 / DSM 7039) GN=proA PE=3 SV=3	Thermus thermophilus HB27	K00147	1.2.1.41		0	0	0	0	0	0	0	0	0	0	0	0
PROA_RHOP5 Gamma-glutamyl phosphate reductase OS=Rhodopseudomonas palustris (strain BisA53) GN=proA PE=3 SV=1	Rhodopseudomonas palustris BisA53	K00147	1.2.1.41		0	0	0	0	0	0	0	0.00315507	0.0173048	0.007347	0.00731261	0
PROA_METS4 Gamma-glutamyl phosphate reductase OS=Methylobacterium sp. (strain 4-46) GN=proA PE=3 SV=1	Methylobacterium	K00147	1.2.1.41		0	0	0	0	0	0	0	0	0	0	0	0
MG: Pyruvate dehydrogenase [NADP(+)] OS=Cryptosporidium parvum GN=PFOR PE=2 SV=1 [Q968X7] Score: 569.0	root	-	1.2.1.51		0	0	0	0	0	0	0.00995867	0.00631014	0.0043262	0.0036735	0.00365631	0.00765521
VDH_PSEFL Vanillin dehydrogenase OS=Pseudomonas fluorescens GN=vdh PE=3 SV=1	Pseudomonas fluorescens	-	1.2.1.67		0	0.00469197	0	0	0	0	0	0	0	0	0	0
HEM1_PSEF5 Glutamyl-tRNA reductase OS=Pseudomonas fluorescens (strain Pf-5 / ATCC BAA-477) GN=hemA PE=3 SV=1	Pseudomonas protegens Pf-5	K02492	1.2.1.70		0	0	0	0	0	0	0	0	0	0	0	0
E4PD_ECOSE D-erythrose-4-phosphate dehydrogenase OS=Escherichia coli (strain SE11) GN=epd PE=3 SV=1	Bacteria	K03472	1.2.1.72		0	0	0	0.00466242	0	0	0.0199173	0.00946522	0.021631	0.0110205	0.0146252	0.019138
E4PD_ECOK1 D-erythrose-4-phosphate dehydrogenase OS=Escherichia coli O1:K1 / APEC GN=epd PE=3 SV=1	Bacteria	K03472	1.2.1.72		0	0	0	0	0	0	0	0.00946522	0.021631	0.0110205	0.0146252	0.019138
E4PD_VIBCH D-erythrose-4-phosphate dehydrogenase OS=Vibrio cholerae serotype O1 (strain ATCC 39315 / El Tor Inaba N16961) GN=epd PE=3 SV=1	Bacteria	K03472	1.2.1.72		0	0	0	0	0	0	0.0199173	0	0	0.0110205	0	0.019138
GAPN_STREI NADP-dependent glyceraldehyde-3-phosphate dehydrogenase OS=Streptococcus equinus GN=gapN PE=1 SV=1	Streptococcus equinus	-	1.2.1.9		0	0	0	0	0	0	0	0	0	0	0	0
GAPN_PEA NADP-dependent glyceraldehyde-3-phosphate dehydrogenase OS=Pisum sativum GN=GAPN PE=1 SV=1	Streptophyta	-	1.2.1.9		0.00541859	0.00469197	0	0.00932484	0.00466331	0.00473393	0.00995867	0.0126203	0.00865239	0.0036735	0.0109689	0.0038276
OXO1_HORVU Oxalate oxidase 1 OS=Hordeum vulgare PE=1 SV=1	Poaceae	-	1.2.3.4		0	0	0	0	0	0	0	0	0	0	0	0
ODP1_ECOLI Pyruvate dehydrogenase E1 component OS=Escherichia coli (strain K12) GN=aceE PE=1 SV=2	Escherichia coli	K00163	1.2.4.1		0.0216743	0.00938394	0.0334726	0.0139873	0.0139899	0.0189357	0.044814	0.0252406	0.0302834	0.0183675	0.00731261	0.0153104
ODP1_BUCAI Pyruvate dehydrogenase E1 component OS=Buchnera aphidicola subsp. Acyrthosiphon pisum (strain APS) GN=aceE PE=3 SV=1	Enterobacteriaceae	K00163	1.2.4.1		0	0	0	0	0	0	0.00497934	0	0	0	0	0.0038276
ODP1_BUCAP Pyruvate dehydrogenase E1 component OS=Buchnera aphidicola subsp. Schizaphis graminum (strain Sg) GN=aceE PE=3 SV=1	Enterobacteriaceae	K00163	1.2.4.1		0	0	0	0	0	0	0.00497934	0	0	0	0	0.0038276
ODPB_GRATL Pyruvate dehydrogenase E1 component subunit beta OS=Gracilaria tenuistipitata var. liui GN=pdhB PE=3 SV=1	Gracilaria tenuistipitata var. liui	-	1.2.4.1		0	0	0	0	0	0	0	0	0	0	0	0
DHTK1_RAT Probable 2-oxoglutarate dehydrogenase E1 component DHKTD1, mitochondrial OS=Rattus norvegicus GN=Dhtkd1 PE=2 SV=1	Rattus norvegicus	K15791	1.2.4.2		0	0.00469197	0	0	0	0	0	0	0	0	0	0
POXB_ECOLI Pyruvate dehydrogenase [ubiquinone] OS=Escherichia coli (strain K12) GN=poxB PE=1 SV=1	Escherichia coli K-12	K00156	1.2.5.1		0	0	0	0	0	0	0.00497934	0	0.0043262	0	0	0
NIFJ_NOSS1 Pyruvate-flavodoxin oxidoreductase OS=Nostoc sp. (strain PCC 7120 / UTEX 2576) GN=nifJ PE=2 SV=2	Nostoc sp. PCC 7120	K03737	1.2.7.-		0.0108372	0.00938394	0.0111575	0	0	0	0	0	0	0.007347	0.00731261	0
NIFJ_KLEPN Pyruvate-flavodoxin oxidoreductase OS=Klebsiella pneumoniae GN=nifJ PE=3 SV=2	root	-	1.2.7.-		0.0216743	0.0187679	0.0167363	0.00466242	0.00466331	0.00946786	0.0199173	0.0126203	0.0129786	0.0330615	0.0365631	0.0229656
MG: Pyruvate-flavodoxin oxidoreductase OS=Anabaena variabilis (strain ATCC 29413 / PCC 7937) GN=nifJ PE=3 SV=1 [Q3M8N0] Score: 681.0	root	K03737	1.2.7.-		0.0108372	0.00938394	0.00557877	0.00466242	0.00466331	0.00946786	0.0199173	0.0157754	0.0129786	0.0183675	0.0219378	0.0267932
GRDB_EUBAC Glycine reductase complex component B subunit gamma OS=Eubacterium acidaminophilum GN=grdB PE=1 SV=3	Eubacterium acidaminophilum	K10670	1.21.4.2		0	0	0	0	0	0	0	0	0	0	0	0
MENJ_MYCS2 Menaquinone reductase OS=Mycobacterium smegmatis (strain ATCC 700084 / mc(2)155) GN=menJ PE=3 SV=1	Mycobacterium smegmatis str. MC2 155	-	1.3.-.-		0	0	0	0	0	0	0	0	0	0.0036735	0	0
MENJ_MYCTU Menaquinone reductase OS=Mycobacterium tuberculosis (strain ATCC 25618 / H37Rv) GN=menJ PE=1 SV=1	Mycobacterium tuberculosis	-	1.3.-.-		0	0	0	0	0	0	0	0	0	0	0	0
MG: Probable tRNA-dihydrouridine synthase 1 OS=Bacillus subtilis (strain 168) GN=dus1 PE=3 SV=1 [P37567] Score: 166.0	Bacillus subtilis subsp. subtilis str. 168	-	1.3.1.-		0	0	0	0	0	0	0	0	0	0	0	0
DUS_RHOCB Probable tRNA-dihydrouridine synthase OS=Rhodobacter capsulatus (strain ATCC BAA-309 / NBRC 16581 / SB1003) GN=dus PE=3 SV=1	Rhodobacter capsulatus SB 1003	-	1.3.1.-		0	0	0	0	0	0	0	0.00315507	0	0	0	0
IFRH_ARATH Isoflavone reductase homolog P3 OS=Arabidopsis thaliana GN=At1g75280 PE=2 SV=1	Arabidopsis thaliana	-	1.3.1.-		0	0	0	0	0	0	0	0	0	0	0	0
DUSA_PSESM tRNA-dihydrouridine(20/20a) synthase OS=Pseudomonas syringae pv. tomato (strain DC3000) GN=dusA PE=3 SV=1	Pseudomonas syringae pv. tomato str. DC3000	K05539	1.3.1.- 1.3.1.91		0	0	0	0	0	0	0	0	0	0	0	0
PRET_ECO57 NAD-dependent dihydropyrimidine dehydrogenase subunit PreT OS=Escherichia coli O157:H7 GN=preT PE=3 SV=1	Escherichia coli O157:H7	K17722	1.3.1.1		0	0	0	0	0	0	0	0	0	0	0	0
ENOX_SOLLC 2-methylene-furan-3-one reductase OS=Solanum lycopersicum GN=EO PE=1 SV=1	Streptophyta	K18980	1.3.1.105		0	0	0	0	0	0	0	0	0	0	0	0
ENTA_ECOLI 2,3-dihydro-2,3-dihydroxybenzoate dehydrogenase OS=Escherichia coli (strain K12) GN=entA PE=1 SV=1	Escherichia coli K-12	K00216	1.3.1.28		0	0	0	0	0	0	0	0	0	0	0	0
POR_AVESA Protochlorophyllide reductase (Fragment) OS=Avena sativa PE=2 SV=1	Avena sativa	-	1.3.1.33		0	0.00938394	0	0.00466242	0	0	0	0	0	0	0	0
PORA_ARATH Protochlorophyllide reductase A, chloroplastic OS=Arabidopsis thaliana GN=PORA PE=1 SV=2	Arabidopsis thaliana	K00218	1.3.1.33		0	0.00938394	0	0.00466242	0	0	0	0	0	0	0	0
FABI_STAAR Enoyl-[acyl-carrier-protein] reductase [NADPH] FabI OS=Staphylococcus aureus (strain MRSA252) GN=fabI PE=1 SV=1	Bacteria	K00208	1.3.1.39		0	0	0	0	0	0	0	0	0	0	0	0
OPR2_ARATH 12-oxophytodienoate reductase 2 OS=Arabidopsis thaliana GN=OPR2 PE=1 SV=2	Arabidopsis thaliana	K05894	1.3.1.42		0	0	0	0	0	0	0	0	0	0	0	0.0038276
ACAR_METS5 Acryloyl-coenzyme A reductase OS=Metallosphaera sedula (strain ATCC 51363 / DSM 5348) GN=Msed_1426 PE=1 SV=1	Metallosphaera sedula DSM 5348	K15020	1.3.1.84		0	0	0	0	0	0	0	0	0	0	0	0
ACUI_ECOLI Probable acrylyl-CoA reductase AcuI OS=Escherichia coli (strain K12) GN=acuI PE=1 SV=1	Escherichia coli K-12	K19745	1.3.1.84		0	0	0	0	0	0	0	0	0	0	0	0
FABV_BURP0 Enoyl-[acyl-carrier-protein] reductase [NADH] OS=Burkholderia pseudomallei (strain 1106a) GN=fabV PE=3 SV=1	Burkholderia	K00209	1.3.1.9		0	0	0	0	0	0	0	0	0.0043262	0	0	0
FABI_SALTY Enoyl-[acyl-carrier-protein] reductase [NADH] FabI OS=Salmonella typhimurium (strain LT2 / SGSC1412 / ATCC 700720) GN=fabI PE=1 SV=3	Enterobacteriaceae	K00208	1.3.1.9		0	0	0	0.00466242	0	0	0.00497934	0	0	0	0	0
FABI_NOSS1 Enoyl-[acyl-carrier-protein] reductase [NADH] FabI OS=Nostoc sp. (strain PCC 7120 / UTEX 2576) GN=fabI PE=3 SV=2	Bacteria	K00208	1.3.1.9		0	0	0	0	0	0	0	0	0	0	0	0
FABI_HELPY Enoyl-[acyl-carrier-protein] reductase [NADH] FabI OS=Helicobacter pylori (strain ATCC 700392 / 26695) GN=fabI PE=1 SV=1	Bacteria	K00208	1.3.1.9		0	0	0	0	0	0	0	0	0	0	0	0
MURB_PROMM UDP-N-acetylenolpyruvoylglucosamine reductase OS=Prochlorococcus marinus (strain MIT 9313) GN=murB PE=3 SV=1	Prochlorococcus marinus	-	1.3.1.98		0	0	0	0	0	0	0	0	0	0	0	0
MURB_LISIN UDP-N-acetylenolpyruvoylglucosamine reductase OS=Listeria innocua serovar 6a (strain CLIP 11262) GN=murB PE=3 SV=1	Listeria innocua Clip11262	K00075	1.3.1.98		0	0	0	0	0	0	0	0	0	0	0	0
MURB_ALKMQ UDP-N-acetylenolpyruvoylglucosamine reductase OS=Alkaliphilus metalliredigens (strain QYMF) GN=murB PE=3 SV=1	Alkaliphilus metalliredigens QYMF	K00075	1.3.1.98		0	0	0	0	0	0	0	0	0	0	0	0.0038276
MURB_AGRRK UDP-N-acetylenolpyruvoylglucosamine reductase OS=Agrobacterium radiobacter (strain K84 / ATCC BAA-868) GN=murB PE=3 SV=1	Agrobacterium radiobacter K84	K00075	1.3.1.98		0	0	0	0.00466242	0	0	0	0	0	0	0	0
HEM6_AGRVS Oxygen-dependent coproporphyrinogen-III oxidase OS=Agrobacterium vitis (strain S4 / ATCC BAA-846) GN=hemF PE=3 SV=1	Agrobacterium vitis S4	K00228	1.3.3.3		0	0	0	0	0	0	0	0	0	0	0	0
PPOX_MOUSE Protoporphyrinogen oxidase OS=Mus musculus GN=Ppox PE=1 SV=1	Mus musculus	K00231	1.3.3.4		0	0	0.00557877	0	0	0	0	0	0	0	0	0
FRDB_SHIFL Fumarate reductase iron-sulfur subunit OS=Shigella flexneri GN=frdB PE=3 SV=2	Enterobacteriaceae	K00245	1.3.5.1		0	0	0	0	0	0	0.00497934	0	0.0173048	0	0	0.0038276
SDHA_ECOLI Succinate dehydrogenase flavoprotein subunit OS=Escherichia coli (strain K12) GN=sdhA PE=1 SV=1	Enterobacteriaceae	K00239	1.3.5.1		0	0	0	0	0	0	0.00995867	0.00631014	0	0	0	0
SDHB_DROME Succinate dehydrogenase [ubiquinone] iron-sulfur subunit, mitochondrial OS=Drosophila melanogaster GN=SdhB PE=2 SV=2	Drosophila melanogaster	K00235	1.3.5.1		0	0	0	0	0	0	0	0	0	0	0	0
PYRD_MYCGI Dihydroorotate dehydrogenase (quinone) OS=Mycobacterium gilvum (strain PYR-GCK) GN=pyrD PE=3 SV=1	Mycobacterium gilvum PYR-GCK	K00254	1.3.5.2		0	0	0	0	0	0	0	0	0	0	0	0
PYRD_CUPMC Dihydroorotate dehydrogenase (quinone) OS=Cupriavidus metallidurans (strain ATCC 43123 / DSM 2839 / NBRC 102507 / CH34) GN=pyrD PE=3 SV=2	Cupriavidus metallidurans CH34	K00254	1.3.5.2		0	0	0	0	0	0	0	0	0	0	0	0
PYRD_MARMS Dihydroorotate dehydrogenase (quinone) OS=Marinomonas sp. (strain MWYL1) GN=pyrD PE=3 SV=1	Marinomonas sp. MWYL1	K00254	1.3.5.2		0.00541859	0.00469197	0.00557877	0.00932484	0	0	0.00497934	0	0	0.0036735	0.00731261	0
FRDA_ECOLI Fumarate reductase flavoprotein subunit OS=Escherichia coli (strain K12) GN=frdA PE=1 SV=3	Enterobacteriaceae	K00244	1.3.5.4		0	0	0	0	0	0	0.0199173	0.0157754	0.021631	0.007347	0	0.00765521
GGR_METM5 Digeranylgeranylglycerophospholipid reductase OS=Methanococcus maripaludis (strain C5 / ATCC BAA-1333) GN=MmarC5_1250 PE=3 SV=1	Methanococcus maripaludis C5	K17830	1.3.7.11		0	0	0	0	0	0	0	0	0	0	0	0
PEBA_SYNPW 15,16-dihydrobiliverdin:ferredoxin oxidoreductase OS=Synechococcus sp. (strain WH7803) GN=pebA PE=3 SV=1	Synechococcus sp. WH 7803	K05369	1.3.7.2		0	0	0	0	0	0	0	0	0	0	0	0
CHLB_AUXPR Light-independent protochlorophyllide reductase subunit B OS=Auxenochlorella protothecoides GN=chlB PE=3 SV=1	Auxenochlorella protothecoides	-	1.3.7.7		0	0	0	0	0	0	0	0	0	0	0	0
MG: Acyl-CoA dehydrogenase, short-chain specific OS=Clostridium acetobutylicum (strain ATCC 824 / DSM 792 / JCM 1419 / LMG 5710 / VKM B-1787) GN=bcd PE=1 SV=1 [P52042] Score: 432.0	Clostridium acetobutylicum ATCC 824	K00248	1.3.8.1		0	0	0	0	0	0	0	0	0	0	0	0.0038276
DHE2_PEPDI NAD-specific glutamate dehydrogenase OS=Peptoclostridium difficile GN=gluD PE=3 SV=1	[Clostridium] difficile	-	1.4.1.2		0	0	0	0	0	0	0.00497934	0	0	0	0	0
DHE4_HELPY NADP-specific glutamate dehydrogenase OS=Helicobacter pylori (strain ATCC 700392 / 26695) GN=gdhA PE=3 SV=1	root	-	1.4.1.2		0.0325115	0.0187679	0.0390514	0.0326369	0.0326432	0.0331375	0.0497934	0.0536362	0.043262	0.022041	0.0329068	0.0114828
ASPD_METTH Probable L-aspartate dehydrogenase OS=Methanothermobacter thermautotrophicus (strain ATCC 29096 / DSM 1053 / JCM 10044 / NBRC 100330 / Delta H) GN=nadX PE=3 SV=1	Methanothermobacter thermautotrophicus str. Delta H	-	1.4.1.21		0	0	0	0	0	0	0	0	0	0	0	0
ASPD_RUEPO Probable L-aspartate dehydrogenase OS=Ruegeria pomeroyi (strain ATCC 700808 / DSM 15171 / DSS-3) GN=nadX PE=3 SV=1	Ruegeria pomeroyi DSS-3	K06989	1.4.1.21		0	0	0	0	0	0	0	0	0	0	0	0
ASPD_CUPTR Probable L-aspartate dehydrogenase OS=Cupriavidus taiwanensis (strain DSM 17343 / BCRC 17206 / CIP 107171 / LMG 19424 / R1) GN=nadX PE=3 SV=1	Cupriavidus taiwanensis LMG 19424	K06989	1.4.1.21		0	0	0	0	0	0	0	0	0.0043262	0	0.00365631	0.0038276
DHE4_ECOLI NADP-specific glutamate dehydrogenase OS=Escherichia coli (strain K12) GN=gdhA PE=1 SV=1	Escherichia coli K-12	K00262	1.4.1.4		0	0	0	0	0	0	0	0	0	0	0	0
DHE4_EMENI NADP-specific glutamate dehydrogenase OS=Emericella nidulans (strain FGSC A4 / ATCC 38163 / CBS 112.46 / NRRL 194 / M139) GN=gdhA PE=3 SV=2	root	K00262	1.4.1.4		0.0216743	0.0140759	0.0278938	0.0186497	0.0186532	0.0189357	0.0199173	0.0252406	0.0129786	0.0110205	0.0109689	0
DHE4_HAEIN NADP-specific glutamate dehydrogenase OS=Haemophilus influenzae (strain ATCC 51907 / DSM 11121 / KW20 / Rd) GN=gdhA PE=3 SV=1	root	K00262	1.4.1.4		0.0379301	0.0234599	0.0446302	0.0279745	0.0373065	0.0331375	0.029876	0.0252406	0.0173048	0.0110205	0.0146252	0.0114828
DHE4_SCHOC NADP-specific glutamate dehydrogenase OS=Schwanniomyces occidentalis GN=GDHA PE=3 SV=1	root	-	1.4.1.4		0.0216743	0.0140759	0.0278938	0.0186497	0.0186532	0.0189357	0.0199173	0.0252406	0.0129786	0.0110205	0.0109689	0
DHE4_SACU7 NADP-specific glutamate dehydrogenase 1 OS=Saccharomyces uvarum (strain ATCC 76518 / CBS 7001 / CLIB 283 / NBRC 10550 / MCYC 623 / NCYC 2669 / NRRL Y-11845) GN=GDH1 PE=3 SV=1	root	K00262	1.4.1.4		0.0216743	0.0140759	0.0278938	0.0186497	0.0186532	0.0189357	0.0199173	0.0252406	0.0173048	0.0110205	0.0109689	0
AMO_ENTAE Primary amine oxidase OS=Enterobacter aerogenes GN=maoA PE=1 SV=1	Enterobacter aerogenes	-	1.4.3.21		0	0	0	0	0	0	0.00497934	0	0	0	0	0
PDXH_PARL1 Pyridoxine/pyridoxamine 5-phosphate oxidase OS=Parvibaculum lavamentivorans (strain DS-1 / DSM 13023 / NCIMB 13966) GN=pdxH PE=3 SV=1	Parvibaculum lavamentivorans DS-1	K00275	1.4.3.5		0	0	0	0	0	0	0	0	0.00865239	0	0	0
GCSPA_DESVM Probable glycine dehydrogenase (decarboxylating) subunit 1 OS=Desulfovibrio vulgaris (strain Miyazaki F / DSM 19637) GN=gcvPA PE=3 SV=1	Desulfovibrio vulgaris str. 'Miyazaki F'	K00282	1.4.4.2		0	0	0	0	0	0	0	0	0	0	0.00365631	0
GCSP_XYLFA Glycine dehydrogenase (decarboxylating) OS=Xylella fastidiosa (strain 9a5c) GN=gcvP PE=3 SV=1	Xylella fastidiosa	K00281	1.4.4.2		0	0	0	0	0	0	0	0	0	0	0	0
GCSP1_ARATH Glycine dehydrogenase (decarboxylating) 1, mitochondrial OS=Arabidopsis thaliana GN=GLDP1 PE=1 SV=2	Streptophyta	K00281	1.4.4.2		0	0	0	0	0	0	0	0	0	0	0	0
GCSP_PEA Glycine dehydrogenase (decarboxylating), mitochondrial OS=Pisum sativum GN=GDCSP PE=1 SV=1	Streptophyta	K00281	1.4.4.2		0	0	0	0	0	0	0	0	0	0	0	0
GLTB_PORPU Ferredoxin-dependent glutamate synthase OS=Porphyra purpurea GN=gltB PE=3 SV=1	Porphyra purpurea	-	1.4.7.1		0	0	0	0	0	0	0	0	0	0	0	0
P5CR_CORGL Pyrroline-5-carboxylate reductase OS=Corynebacterium glutamicum (strain ATCC 13032 / DSM 20300 / JCM 1318 / LMG 3730 / NCIMB 10025) GN=proC PE=3 SV=1	Corynebacterium	K00286	1.5.1.2		0	0.00469197	0	0	0	0	0	0	0	0	0	0
MG: FMN reductase [NAD(P)H] OS=Bacillus subtilis (strain 168) GN=nfrA2 PE=1 SV=1 [P94424] Score: 250.0	Bacillus subtilis subsp. subtilis str. 168	K19286	1.5.1.39		0	0	0	0	0	0	0	0	0	0	0	0
MG: Bifunctional protein FolD OS=Leuconostoc citreum (strain KM20) GN=folD PE=3 SV=1 [B1N044] Score: 561.0	Leuconostoc citreum KM20	K01491	1.5.1.5 3.5.4.9		0	0	0	0	0	0	0	0.00315507	0	0	0	0
FOLD_RHISN Bifunctional protein FolD OS=Rhizobium sp. (strain NGR234) GN=folD PE=3 SV=1	Sinorhizobium fredii NGR234	K01491	1.5.1.5 3.5.4.9		0	0	0	0	0	0	0	0	0	0	0	0
FOLD_ORITI Bifunctional protein FolD OS=Orientia tsutsugamushi (strain Ikeda) GN=folD PE=3 SV=1	Orientia tsutsugamushi str. Ikeda	K01491	1.5.1.5 3.5.4.9		0	0	0.0111575	0	0	0	0.00497934	0	0.0043262	0.0036735	0	0.00765521
FOLD1_SPHWW Bifunctional protein FolD 1 OS=Sphingomonas wittichii (strain RW1 / DSM 6014 / JCM 10273) GN=folD1 PE=3 SV=1	Sphingomonas wittichii RW1	K01491	1.5.1.5 3.5.4.9		0	0	0	0	0	0	0	0	0	0	0.00365631	0
FOLD_NITEC Bifunctional protein FolD OS=Nitrosomonas eutropha (strain C91) GN=folD PE=3 SV=1	Nitrosomonas eutropha C91	K01491	1.5.1.5 3.5.4.9		0	0	0	0	0	0	0	0	0	0	0	0
ETFD_PSEAE Electron transfer flavoprotein-ubiquinone oxidoreductase OS=Pseudomonas aeruginosa (strain ATCC 15692 / PAO1 / 1C / PRS 101 / LMG 12228) GN=PA2953 PE=1 SV=1	Pseudomonas aeruginosa PAO1	K00311	1.5.5.1		0	0	0	0	0	0	0	0	0	0	0	0
ETFD_PONAB Electron transfer flavoprotein-ubiquinone oxidoreductase, mitochondrial OS=Pongo abelii GN=ETFDH PE=2 SV=1	Pongo abelii	K00311	1.5.5.1		0	0	0	0	0	0	0	0	0	0	0	0
MG: Flavo-diiron protein FprA1 OS=Clostridium acetobutylicum (strain ATCC 824 / DSM 792 / JCM 1419 / LMG 5710 / VKM B-1787) GN=fprA1 PE=1 SV=1 [Q97K92] Score: 506.0	Clostridium acetobutylicum ATCC 824	-	1.6.3.4		0	0	0	0	0	0	0	0.00315507	0.0043262	0	0.00365631	0.0038276
NU4LC_RANMC NAD(P)H-quinone oxidoreductase subunit 4L, chloroplastic OS=Ranunculus macranthus GN=ndhE PE=3 SV=1	Ranunculus macranthus	-	1.6.5.-		0	0	0.00557877	0	0	0	0	0	0	0	0	0
NU4C_ILLOL NAD(P)H-quinone oxidoreductase chain 4, chloroplastic OS=Illicium oligandrum GN=ndhD PE=3 SV=1	Streptophyta	-	1.6.5.-		0	0	0	0	0	0	0	0	0	0	0	0
NU4C_PLAOC NAD(P)H-quinone oxidoreductase chain 4, chloroplastic OS=Platanus occidentalis GN=ndhD PE=3 SV=1	Streptophyta	-	1.6.5.-		0	0	0	0	0	0	0	0	0	0	0	0
NU1C_LOTJA NAD(P)H-quinone oxidoreductase subunit 1, chloroplastic OS=Lotus japonicus GN=ndhA PE=3 SV=1	Streptophyta	K05572	1.6.5.-		0	0	0	0	0	0	0	0	0	0	0	0
NDHJ_CYCTA NAD(P)H-quinone oxidoreductase subunit J, chloroplastic OS=Cycas taitungensis GN=ndhJ PE=3 SV=1	Streptophyta	-	1.6.5.-		0	0	0	0	0	0	0	0	0	0	0	0
NDHJ_LEMMI NAD(P)H-quinone oxidoreductase subunit J, chloroplastic OS=Lemna minor GN=ndhJ PE=3 SV=1	Streptophyta	-	1.6.5.-		0	0	0	0	0	0	0	0	0	0	0	0
NDHJ_BRADI NAD(P)H-quinone oxidoreductase subunit J, chloroplastic OS=Brachypodium distachyon GN=ndhJ PE=3 SV=1	Streptophyta	-	1.6.5.-		0	0	0	0	0	0	0	0	0	0	0	0
NDHH_PLAOC NAD(P)H-quinone oxidoreductase subunit H, chloroplastic OS=Platanus occidentalis GN=ndhH PE=3 SV=1	root	-	1.6.5.-		0	0	0	0	0	0	0	0	0	0	0	0
NDHH_WHEAT NAD(P)H-quinone oxidoreductase subunit H, chloroplastic OS=Triticum aestivum GN=ndhH PE=3 SV=1	root	K05579	1.6.5.-		0	0	0	0	0	0	0	0	0	0	0	0
NUOD2_STRGG NADH-quinone oxidoreductase subunit D 2 OS=Streptomyces griseus subsp. griseus (strain JCM 4626 / NBRC 13350) GN=nuoD2 PE=3 SV=1	Streptomyces griseus subsp. griseus NBRC 13350	K00333	1.6.5.11		0	0.00469197	0	0	0	0	0	0	0	0	0	0
NUOB1_HERA2 NADH-quinone oxidoreductase subunit B 1 OS=Herpetosiphon aurantiacus (strain ATCC 23779 / DSM 785) GN=nuoB1 PE=3 SV=1	Herpetosiphon aurantiacus DSM 785	K00331	1.6.5.11		0	0	0	0	0	0	0	0	0	0	0.00365631	0
NUOB2_HERA2 NADH-quinone oxidoreductase subunit B 2 OS=Herpetosiphon aurantiacus (strain ATCC 23779 / DSM 785) GN=nuoB2 PE=3 SV=1	Herpetosiphon aurantiacus DSM 785	K00331	1.6.5.11		0	0	0	0	0	0	0	0.00315507	0	0	0	0
NUOH1_SYMTH NADH-quinone oxidoreductase subunit H 1 OS=Symbiobacterium thermophilum (strain T / IAM 14863) GN=nuoH1 PE=3 SV=1	Symbiobacterium thermophilum IAM 14863	K00337	1.6.5.11		0	0	0	0	0	0	0	0	0	0	0	0.0038276
NUOB1_NITMU NADH-quinone oxidoreductase subunit B 1 OS=Nitrosospira multiformis (strain ATCC 25196 / NCIMB 11849) GN=nuoB1 PE=3 SV=1	Nitrosospira multiformis ATCC 25196	K00331	1.6.5.11		0	0	0	0	0	0	0	0	0	0	0	0
CHRR_ECO57 Chromate reductase OS=Escherichia coli O157:H7 GN=chrR PE=3 SV=1	Escherichia coli O157:H7	K19784	1.6.5.2		0	0	0	0	0	0	0	0	0	0	0	0
NQOR_SERP5 NAD(P)H dehydrogenase (quinone) OS=Serratia proteamaculans (strain 568) GN=Spro_1813 PE=3 SV=1	Enterobacteriaceae	K03809	1.6.5.2		0.0108372	0.0234599	0	0.0139873	0.0139899	0.00946786	0.00995867	0.0126203	0.0129786	0.007347	0.0146252	0.0153104
NQOR_SHIF8 NAD(P)H dehydrogenase (quinone) OS=Shigella flexneri serotype 5b (strain 8401) GN=SFV_1016 PE=3 SV=1	Enterobacteriaceae	K03809	1.6.5.2		0.0812788	0.117299	0.0334726	0.11656	0.0979295	0.113614	0.134442	0.145133	0.121133	0.095511	0.120658	0.145449
NQOR_YERPY NAD(P)H dehydrogenase (quinone) OS=Yersinia pseudotuberculosis serotype O:3 (strain YPIII) GN=YPK_2363 PE=3 SV=1	Enterobacteriaceae	K03809	1.6.5.2		0.0216743	0.0234599	0.00557877	0.0233121	0.0233165	0.0189357	0.0398347	0.0473261	0.0302834	0.0183675	0.0329068	0.0306208
NU5M_CRYNH NADH-ubiquinone oxidoreductase chain 5 OS=Cryptococcus neoformans var. grubii serotype A (strain H99 / ATCC 208821 / CBS 10515 / FGSC 9487) GN=ND5 PE=3 SV=1	Cryptococcus neoformans var. grubii H99	-	1.6.5.3		0	0	0	0	0	0	0	0	0	0	0	0
NU1M_MYXGL NADH-ubiquinone oxidoreductase chain 1 OS=Myxine glutinosa GN=MT-ND1 PE=3 SV=1	Chordata	-	1.6.5.3		0	0	0	0	0	0	0	0	0	0	0	0
MG: NADH-ubiquinone oxidoreductase chain 5 OS=Anopheles quadrimaculatus GN=ND5 PE=3 SV=1 [P33510] Score: 670.0	root	-	1.6.5.3		0.0108372	0.0140759	0	0	0.0186532	0.00946786	0.00497934	0.00631014	0	0.007347	0.00731261	0
GS14_BACSU General stress protein 14 OS=Bacillus subtilis (strain 168) GN=ywrO PE=1 SV=2	Bacillus subtilis subsp. subtilis str. 168	-	1.6.99.-		0	0	0	0	0	0	0	0	0	0	0	0
NAMA_BACHK NADPH dehydrogenase OS=Bacillus thuringiensis subsp. konkukian (strain 97-27) GN=namA PE=3 SV=1	Bacillus thuringiensis serovar konkukian str. 97-27	K00354	1.6.99.1		0	0	0	0	0	0	0	0	0	0	0	0.0038276
MG: NADH oxidase OS=Enterococcus faecalis (strain ATCC 700802 / V583) GN=nox PE=1 SV=1 [P37061] Score: 495.0	Enterococcus faecalis V583	-	1.6.99.3		0	0	0	0	0	0	0.00995867	0.00315507	0.0043262	0.0036735	0.00365631	0
NAOX_STRP6 Probable NADH oxidase OS=Streptococcus pyogenes serotype M6 (strain ATCC BAA-946 / MGAS10394) GN=M6_Spy0868 PE=1 SV=1	Streptococcus pyogenes MGAS10394	-	1.6.99.3		0	0	0	0	0	0	0	0	0	0	0	0
AZOR_CLOPS FMN-dependent NADH-azoreductase OS=Clostridium perfringens (strain SM101 / Type A) GN=azoR PE=3 SV=1	Clostridium perfringens	K01118	1.7.-.-		0	0	0	0	0	0	0.00497934	0.00631014	0.0043262	0	0	0
AZOR_AGRFC FMN-dependent NADH-azoreductase OS=Agrobacterium fabrum (strain C58 / ATCC 33970) GN=azoR PE=3 SV=2	Agrobacterium fabrum str. C58	K01118	1.7.-.-		0	0	0	0	0	0	0	0	0	0	0	0
AZOR_SHISS FMN-dependent NADH-azoreductase OS=Shigella sonnei (strain Ss046) GN=azoR PE=3 SV=1	Enterobacteriaceae	K01118	1.7.-.-		0	0.00469197	0	0	0	0	0	0	0	0	0	0
AZOR_MYCPU FMN-dependent NADH-azoreductase OS=Mycoplasma pulmonis (strain UAB CTIP) GN=azoR PE=3 SV=1	Mycoplasma pulmonis UAB CTIP	-	1.7.-.-		0	0	0	0.00466242	0	0	0	0	0	0	0	0
GUAC_STRZJ GMP reductase OS=Streptococcus pneumoniae (strain JJA) GN=guaC PE=3 SV=1	Streptococcus pneumoniae	K00364	1.7.1.7		0	0	0	0	0	0	0	0	0	0	0	0
HCP_PORG3 Hydroxylamine reductase OS=Porphyromonas gingivalis (strain ATCC 33277 / DSM 20709 / CIP 103683 / JCM 12257 / NCTC 11834 / 2561) GN=hcp PE=3 SV=1	Porphyromonas gingivalis ATCC 33277	K05601	1.7.99.1		0	0	0.00557877	0.00466242	0	0	0	0	0	0	0	0
MG: Hydroxylamine reductase OS=Syntrophobacter fumaroxidans (strain DSM 10017 / MPOB) GN=hcp PE=3 SV=1 [A0LNW5] Score: 137.0	Bacteria	K05601	1.7.99.1		0	0	0	0	0	0	0.00995867	0.00631014	0.0043262	0	0	0
MG: Hydroxylamine reductase OS=Cyanothece sp. (strain PCC 8801) GN=hcp PE=3 SV=1 [B7JYM8] Score: 536.0	Bacteria	K05601	1.7.99.1		0	0	0	0	0	0	0.00995867	0.00631014	0.00865239	0	0	0
MG: Nitrate reductase OS=Synechocystis sp. (strain PCC 6803 / Kazusa) GN=narB PE=3 SV=1 [P73448] Score: 348.0	Synechocystis sp. PCC 6803 substr. Kazusa	K00367	1.7.99.4		0	0	0	0	0	0	0.00497934	0.00315507	0	0	0.00365631	0.0038276
MG: Sulfite reductase, assimilatory-type OS=Desulfovibrio vulgaris (strain Hildenborough / ATCC 29579 / NCIMB 8303) GN=DVU_1597 PE=4 SV=2 [Q05805] Score: 182.0	Desulfovibrio vulgaris str. Hildenborough	-	1.8.-.-		0	0	0	0	0	0	0.00497934	0.00315507	0	0	0	0
GSXLY_ARATH Putative flavin-containing monooxygenase FMO GS-OX-like 11 OS=Arabidopsis thaliana GN=At1g63390 PE=5 SV=1	Arabidopsis thaliana	-	1.8.-.-		0	0	0	0	0	0	0	0	0	0	0	0
AHPF_ECOLI Alkyl hydroperoxide reductase subunit F OS=Escherichia coli (strain K12) GN=ahpF PE=1 SV=2	Enterobacteriaceae	K03387	1.8.1.-		0	0	0	0	0	0	0	0.00631014	0.0043262	0	0.00365631	0
CDR_PYRFU Coenzyme A disulfide reductase OS=Pyrococcus furiosus (strain ATCC 43587 / DSM 3638 / JCM 8422 / Vc1) GN=PF1186 PE=3 SV=1	Pyrococcus furiosus DSM 3638	K18367	1.8.1.14		0	0	0	0	0	0	0	0	0	0.0036735	0	0
CYSJ_SHESA Sulfite reductase [NADPH] flavoprotein alpha-component OS=Shewanella sp. (strain ANA-3) GN=cysJ PE=3 SV=1	root	K00380	1.8.1.2		0	0	0	0	0	0	0.00497934	0.00631014	0.00865239	0.0036735	0.00365631	0
DLDH_CORGL Dihydrolipoyl dehydrogenase OS=Corynebacterium glutamicum (strain ATCC 13032 / DSM 20300 / JCM 1318 / LMG 3730 / NCIMB 10025) GN=lpd PE=1 SV=1	Corynebacterium glutamicum ATCC 13032	K00382	1.8.1.4		0	0	0	0	0	0.00473393	0	0	0	0	0	0
DLDH_ECOL6 Dihydrolipoyl dehydrogenase OS=Escherichia coli O6:H1 (strain CFT073 / ATCC 700928 / UPEC) GN=lpdA PE=3 SV=2	Enterobacteriaceae	K00382	1.8.1.4		0.0162558	0.0187679	0.0111575	0.0233121	0.0186532	0.0142018	0.029876	0.0315507	0.0389358	0.0183675	0.0146252	0.0114828
DLDH_VIBCH Dihydrolipoyl dehydrogenase OS=Vibrio cholerae serotype O1 (strain ATCC 39315 / El Tor Inaba N16961) GN=lpd PE=3 SV=1	Gammaproteobacteria	K00382	1.8.1.4		0	0	0	0	0	0	0	0	0.0043262	0.0036735	0	0
MG: Thioredoxin reductase OS=Staphylococcus aureus (strain MSSA476) GN=trxB PE=3 SV=1 [Q6GB66] Score: 131.0	Staphylococcus aureus subsp. aureus	K00384	1.8.1.9		0	0	0	0	0	0	0.00497934	0.00315507	0.0043262	0.0036735	0.00365631	0.0038276
TRXB_RICTY Thioredoxin reductase OS=Rickettsia typhi (strain ATCC VR-144 / Wilmington) GN=trxB PE=3 SV=1	Rickettsia typhi str. Wilmington	K00384	1.8.1.9		0	0	0	0	0	0	0	0	0	0	0	0
TRXB_ECO57 Thioredoxin reductase OS=Escherichia coli O157:H7 GN=trxB PE=3 SV=2	Escherichia coli O157:H7	K00384	1.8.1.9		0	0	0	0	0	0	0	0	0	0	0	0
TRXB_ALIFS Thioredoxin reductase (Fragment) OS=Aliivibrio fischeri GN=trxB PE=1 SV=1	Gammaproteobacteria	-	1.8.1.9		0	0	0	0	0	0	0	0	0	0	0	0
TRXB_VIBCH Thioredoxin reductase OS=Vibrio cholerae serotype O1 (strain ATCC 39315 / El Tor Inaba N16961) GN=trxB PE=3 SV=1	Gammaproteobacteria	K00384	1.8.1.9		0	0	0	0	0	0	0	0	0	0	0	0
ERO1_YEAST Endoplasmic oxidoreductin-1 OS=Saccharomyces cerevisiae (strain ATCC 204508 / S288c) GN=ERO1 PE=1 SV=1	Saccharomyces cerevisiae S288c	-	1.8.4.-		0.0108372	0	0	0	0.00466331	0	0	0	0	0	0	0
MSRP_YERPE Protein-methionine-sulfoxide reductase catalytic subunit MsrP OS=Yersinia pestis GN=msrP PE=3 SV=1	Yersinia	K07147	1.8.5.-		0	0	0	0	0	0	0	0	0	0	0	0
DMSA_ECOLI Dimethyl sulfoxide reductase DmsA OS=Escherichia coli (strain K12) GN=dmsA PE=1 SV=2	Escherichia coli K-12	K07306	1.8.5.3		0	0	0	0	0	0	0	0	0.0043262	0	0	0
ANSME_CLOPE Anaerobic sulfatase-maturating enzyme OS=Clostridium perfringens (strain 13 / Type A) GN=CPE0635 PE=3 SV=1	Clostridium perfringens str. 13	K06871	1.8.98.-		0	0	0	0	0	0	0	0	0	0	0	0
HDRA_METMP CoB--CoM heterodisulfide reductase iron-sulfur subunit A OS=Methanococcus maripaludis (strain S2 / LL) GN=hdrA PE=3 SV=2	Methanococcus maripaludis S2	K03388	1.8.98.1		0	0	0.00557877	0	0	0	0	0	0	0	0	0
APRA_DESGI Adenylylsulfate reductase subunit alpha OS=Desulfovibrio gigas GN=aprA PE=1 SV=1	Desulfovibrio gigas	K00394	1.8.99.2		0	0	0	0.00466242	0.00466331	0	0	0	0	0	0	0
COX2_VIGUN Cytochrome c oxidase subunit 2, mitochondrial (Fragment) OS=Vigna unguiculata GN=COX2 PE=2 SV=2	Streptophyta	-	1.9.3.1		0	0	0	0	0	0	0	0	0	0	0	0
COX2_ARATH Cytochrome c oxidase subunit 2 OS=Arabidopsis thaliana GN=COX2 PE=2 SV=2	Streptophyta	-	1.9.3.1		0	0	0	0	0	0	0	0	0	0	0	0
COX2_MARPO Cytochrome c oxidase subunit 2 OS=Marchantia polymorpha GN=COX2 PE=3 SV=3	Streptophyta	-	1.9.3.1		0	0	0	0	0	0	0	0	0	0	0	0
COX2_WHEAT Cytochrome c oxidase subunit 2 OS=Triticum aestivum GN=COX2 PE=2 SV=2	Streptophyta	-	1.9.3.1		0	0	0	0	0	0	0	0	0	0	0	0
PSAA_SOLBU Photosystem I P700 chlorophyll a apoprotein A1 OS=Solanum bulbocastanum GN=psaA PE=3 SV=1	Streptophyta	-	1.97.1.12		0	0	0	0	0	0	0	0	0	0	0	0
PSAA_WHEAT Photosystem I P700 chlorophyll a apoprotein A1 OS=Triticum aestivum GN=psaA PE=3 SV=1	Streptophyta	-	1.97.1.12		0	0	0	0	0	0	0	0	0	0	0	0
PSAB_WHEAT Photosystem I P700 chlorophyll a apoprotein A2 OS=Triticum aestivum GN=psaB PE=3 SV=1	root	-	1.97.1.12		0	0	0	0	0	0	0	0	0	0	0	0
PSAB_PROMM Photosystem I P700 chlorophyll a apoprotein A2 OS=Prochlorococcus marinus (strain MIT 9313) GN=psaB PE=3 SV=1	root	-	1.97.1.12		0	0	0	0	0	0	0	0	0	0	0	0
PSAC_ZYGCR Photosystem I iron-sulfur center OS=Zygnema circumcarinatum GN=psaC PE=3 SV=1	root	-	1.97.1.12		0	0	0	0	0	0	0	0	0	0	0	0
YBIS_ECOLI Probable L,D-transpeptidase YbiS OS=Escherichia coli (strain K12) GN=ybiS PE=1 SV=1	Escherichia coli	K19235	2.-.-.-		0	0	0	0	0	0	0	0	0	0	0	0
GPI13_YEAST GPI ethanolamine phosphate transferase 3 OS=Saccharomyces cerevisiae (strain ATCC 204508 / S288c) GN=GPI13 PE=1 SV=1	Saccharomyces cerevisiae S288c	K05288	2.-.-.-		0	0	0	0	0.00466331	0	0	0	0	0	0	0
CAF17_ASPCL Putative transferase caf17, mitochondrial OS=Aspergillus clavatus (strain ATCC 1007 / CBS 513.65 / DSM 816 / NCTC 3887 / NRRL 1) GN=caf17 PE=3 SV=1	Aspergillus clavatus NRRL 1	-	2.1.-.-		0.0162558	0.00469197	0	0.00932484	0.00932662	0.00473393	0	0	0	0	0	0
MG: Ribosomal RNA small subunit methyltransferase B OS=Bacillus subtilis (strain 168) GN=rsmB PE=3 SV=2 [P94464] Score: 155.0	Bacillus subtilis subsp. subtilis str. 168	K03500	2.1.1.-		0	0	0	0	0	0	0	0	0.0043262	0	0	0
PRMA_STRPS Ribosomal protein L11 methyltransferase OS=Streptococcus pneumoniae (strain CGSP14) GN=prmA PE=3 SV=1	Streptococcus	K02687	2.1.1.-		0	0	0	0	0	0	0.00497934	0	0	0	0	0
Y0656_EMENI Uncharacterized methyltransferase AN0656 OS=Emericella nidulans (strain FGSC A4 / ATCC 38163 / CBS 112.46 / NRRL 194 / M139) GN=AN0656 PE=1 SV=1	Aspergillus nidulans FGSC A4	-	2.1.1.-		0	0	0	0	0	0	0	0	0	0	0	0
SPB1_KLULA AdoMet-dependent rRNA methyltransferase SPB1 OS=Kluyveromyces lactis (strain ATCC 8585 / CBS 2359 / DSM 70799 / NBRC 1267 / NRRL Y-1140 / WM37) GN=SPB1 PE=3 SV=1	Kluyveromyces lactis NRRL Y-1140	K14857	2.1.1.-		0	0	0	0	0	0	0	0	0	0	0	0
YL89_SCHPO Uncharacterized methyltransferase C25B8.09 OS=Schizosaccharomyces pombe (strain 972 / ATCC 24843) GN=SPAC25B8.09 PE=3 SV=1	Schizosaccharomyces pombe 972h-	-	2.1.1.-		0	0	0	0	0	0	0	0.00315507	0	0	0	0
OMT2_PHACR 3-O-methyltransferase 2 OS=Phanerochaete chrysosporium (strain RP-78 / ATCC MYA-4764 / FGSC 9002) GN=e_gw1.4.1014.1 PE=1 SV=1	Phanerochaete chrysosporium RP-78	-	2.1.1.-		0	0	0	0.00466242	0	0.00473393	0	0	0.0043262	0	0	0
D2HND6_AILME rRNA adenine N(6)-methyltransferase (Fragment) OS=Ailuropoda melanoleuca GN=PANDA_013195 PE=3 SV=1	Ailuropoda melanoleuca	-	2.1.1.-		0	0	0	0	0	0	0	0	0	0	0	0
ANM9_MOUSE Putative protein arginine N-methyltransferase 9 OS=Mus musculus GN=Prmt9 PE=2 SV=2	Mus musculus	K19737	2.1.1.-		0	0	0	0	0	0	0	0	0	0	0.00365631	0
RSMA_THEKO Probable ribosomal RNA small subunit methyltransferase A OS=Thermococcus kodakarensis (strain ATCC BAA-918 / JCM 12380 / KOD1) GN=rsmA PE=3 SV=1	root	K02528	2.1.1.-		0	0	0	0	0	0	0	0	0	0.0036735	0.00365631	0
RDRP_CLBVS RNA replication polyprotein OS=Citrus leaf blotch virus (isolate Nagami kumquat/France/SRA-153/1984) GN=ORF1 PE=3 SV=1	Citrus leaf blotch virus FRA/SRA-153	-	2.1.1.- 1.14.11.- 3.4.22.- 2.7.7.48 3.6.4.13		0	0	0	0	0	0	0	0	0	0	0	0
RDRP_SBWMN Replicase large subunit OS=Soil-borne wheat mosaic virus (strain United States/Nebraska/1981) GN=rep PE=3 SV=1	Soil-borne wheat mosaic virus strain Nebraska	-	2.1.1.- 2.7.7.- 2.7.7.48 3.6.4.13 2.1.1.- 2.7.7.- 3.6.4.13		0	0	0	0	0	0	0	0	0.0043262	0	0	0
POLN_SLDV Non-structural polyprotein OS=Sleeping disease virus PE=2 SV=1	Sleeping disease virus	-	2.1.1.- 2.7.7.- 3.1.3.33 3.4.22.- 3.6.1.15 3.6.4.13 2.7.7.48		0	0	0	0	0	0	0	0	0	0	0	0
CAMT1_ARATH Putative caffeoyl-CoA O-methyltransferase At1g67980 OS=Arabidopsis thaliana GN=At1g67980 PE=2 SV=1	Arabidopsis thaliana	K00588	2.1.1.104		0	0	0	0	0	0	0.00497934	0	0	0	0	0
HEMX_ECOLI Putative uroporphyrinogen-III C-methyltransferase OS=Escherichia coli (strain K12) GN=hemX PE=1 SV=1	Escherichia coli K-12	K02496	2.1.1.107		0	0	0	0	0	0	0	0	0	0	0	0
SUMT_PSEFL Uroporphyrinogen-III C-methyltransferase OS=Pseudomonas fluorescens GN=cobA PE=3 SV=1	Pseudomonas fluorescens	-	2.1.1.107		0	0	0	0	0	0	0	0	0	0	0	0
METH_CAEBR Probable methionine synthase OS=Caenorhabditis briggsae GN=metr-1 PE=3 SV=2	Caenorhabditis	-	2.1.1.13		0	0	0	0	0	0	0	0	0	0	0	0
METE_BORBR 5-methyltetrahydropteroyltriglutamate--homocysteine methyltransferase OS=Bordetella bronchiseptica (strain ATCC BAA-588 / NCTC 13252 / RB50) GN=metE PE=3 SV=1	Bordetella	K00549	2.1.1.14		0	0	0	0	0	0	0	0	0	0.0036735	0	0
METE_PROMH 5-methyltetrahydropteroyltriglutamate--homocysteine methyltransferase OS=Proteus mirabilis (strain HI4320) GN=metE PE=3 SV=1	Proteus mirabilis HI4320	K00549	2.1.1.14		0	0	0	0	0	0	0	0	0	0	0	0
METE_PLESU 5-methyltetrahydropteroyltriglutamate--homocysteine methyltransferase OS=Plectranthus scutellarioides GN=MET PE=1 SV=2	Streptophyta	K00549	2.1.1.14		0	0	0	0	0	0	0	0	0	0	0	0
TAM_RHISN Trans-aconitate 2-methyltransferase OS=Rhizobium sp. (strain NGR234) GN=tam PE=3 SV=1	Sinorhizobium fredii NGR234	K00598	2.1.1.144		0	0	0	0	0	0	0	0	0	0.0036735	0	0
RLME_COLP3 Ribosomal RNA large subunit methyltransferase E OS=Colwellia psychrerythraea (strain 34H / ATCC BAA-681) GN=rlmE PE=3 SV=1	Colwellia psychrerythraea 34H	K02427	2.1.1.166		0	0	0	0	0	0	0	0	0	0	0.00365631	0
CHO2_CLAL4 Phosphatidylethanolamine N-methyltransferase OS=Clavispora lusitaniae (strain ATCC 42720) GN=CHO2 PE=3 SV=1	Clavispora lusitaniae ATCC 42720	K16369	2.1.1.17		0.00541859	0.00469197	0.0111575	0	0	0	0	0.00315507	0	0	0	0
RSMG2_SYNFM Ribosomal RNA small subunit methyltransferase G 2 OS=Syntrophobacter fumaroxidans (strain DSM 10017 / MPOB) GN=rsmG2 PE=3 SV=1	Syntrophobacter fumaroxidans MPOB	K03501	2.1.1.170		0	0	0	0	0	0	0.00497934	0	0	0	0	0
RSMC_HAEDU Ribosomal RNA small subunit methyltransferase C OS=Haemophilus ducreyi (strain 35000HP / ATCC 700724) GN=rsmC PE=3 SV=1	Haemophilus ducreyi 35000HP	K00564	2.1.1.172		0	0	0	0.00466242	0	0	0	0	0	0	0	0
RSMC_ALISL Ribosomal RNA small subunit methyltransferase C OS=Aliivibrio salmonicida (strain LFI1238) GN=rsmC PE=3 SV=2	Aliivibrio salmonicida LFI1238	K00564	2.1.1.172		0	0	0	0	0	0	0	0	0	0	0	0
RLMKL_HAHCH Ribosomal RNA large subunit methyltransferase K/L OS=Hahella chejuensis (strain KCTC 2396) GN=rlmL PE=3 SV=1	Hahella chejuensis KCTC 2396	K12297	2.1.1.173 2.1.1.264		0	0	0	0	0	0	0	0	0	0	0	0
RLMKL_MARMS Ribosomal RNA large subunit methyltransferase K/L OS=Marinomonas sp. (strain MWYL1) GN=rlmL PE=3 SV=1	Marinomonas sp. MWYL1	K12297	2.1.1.173 2.1.1.264		0	0	0	0	0.00466331	0	0	0	0	0	0	0
RLMKL_ACIAD Ribosomal RNA large subunit methyltransferase K/L OS=Acinetobacter baylyi (strain ATCC 33305 / BD413 / ADP1) GN=rlmL PE=3 SV=1	Acinetobacter sp. ADP1	K12297	2.1.1.173 2.1.1.264		0	0	0	0	0	0	0	0	0	0	0	0
RLMG_VIBTL Ribosomal RNA large subunit methyltransferase G OS=Vibrio tasmaniensis (strain LGP32) GN=rlmG PE=3 SV=1	Vibrio splendidus LGP32	K00564	2.1.1.174		0	0	0	0	0	0	0	0.00315507	0	0	0	0
RSMF_CITK8 Ribosomal RNA small subunit methyltransferase F OS=Citrobacter koseri (strain ATCC BAA-895 / CDC 4225-83 / SGSC4696) GN=rsmF PE=3 SV=1	Citrobacter koseri ATCC BAA-895	K11392	2.1.1.178		0	0.00469197	0	0	0	0	0	0	0	0	0	0
RSMA_RHOE4 Ribosomal RNA small subunit methyltransferase A OS=Rhodococcus erythropolis (strain PR4 / NBRC 100887) GN=rsmA PE=3 SV=1	Rhodococcus erythropolis PR4	K02528	2.1.1.182		0	0	0	0	0	0	0	0	0	0	0	0
RSMA_PEPD6 Ribosomal RNA small subunit methyltransferase A OS=Peptoclostridium difficile (strain 630) GN=rsmA PE=3 SV=1	Clostridium difficile 630	K02528	2.1.1.182		0	0.00469197	0	0	0	0	0	0	0	0	0	0
RSMA_MYCPN Ribosomal RNA small subunit methyltransferase A OS=Mycoplasma pneumoniae (strain ATCC 29342 / M129) GN=rsmA PE=3 SV=1	Mycoplasma pneumoniae M129	K02528	2.1.1.182		0	0	0	0	0	0	0	0	0	0	0	0
RLMD_AERS4 23S rRNA (uracil(1939)-C(5))-methyltransferase RlmD OS=Aeromonas salmonicida (strain A449) GN=rlmD PE=3 SV=1	Aeromonas salmonicida subsp. salmonicida A449	K03215	2.1.1.190		0	0	0	0	0	0	0	0	0	0	0	0
RLMI_VIBCB Ribosomal RNA large subunit methyltransferase I OS=Vibrio campbellii (strain ATCC BAA-1116 / BB120) GN=rlmI PE=3 SV=1	Vibrio	K06969	2.1.1.191		0	0	0	0	0	0.00473393	0	0	0	0	0	0
RLMN_AERS4 Dual-specificity RNA methyltransferase RlmN OS=Aeromonas salmonicida (strain A449) GN=rlmN PE=3 SV=1	Aeromonas salmonicida subsp. salmonicida A449	K06941	2.1.1.192		0	0	0	0	0	0	0	0	0	0	0	0
RLMN_THEM4 Probable dual-specificity RNA methyltransferase RlmN OS=Thermosipho melanesiensis (strain DSM 12029 / CIP 104789 / BI429) GN=rlmN PE=3 SV=1	root	K06941	2.1.1.192		0	0	0	0	0	0	0	0	0	0.0036735	0.00365631	0
MG: Cobalt-precorrin-5B C(1)-methyltransferase OS=Clostridium perfringens (strain ATCC 13124 / DSM 756 / JCM 1290 / NCIMB 6125 / NCTC 8237 / Type A) GN=cbiD PE=3 SV=1 [Q0TR61] Score: 449.0	Clostridium perfringens ATCC 13124	K02188	2.1.1.195		0	0	0	0	0	0	0	0	0	0	0	0
CBID_THEAB Cobalt-precorrin-5B C(1)-methyltransferase OS=Thermosipho africanus (strain TCF52B) GN=cbiD PE=3 SV=1	Thermosipho africanus TCF52B	K02188	2.1.1.195		0	0	0	0	0	0	0	0	0	0	0	0
RSMH_METNO Ribosomal RNA small subunit methyltransferase H OS=Methylobacterium nodulans (strain ORS2060 / LMG 21967) GN=rsmH PE=3 SV=1	Methylobacterium nodulans ORS 2060	K03438	2.1.1.199		0	0	0	0	0	0	0	0	0.0043262	0	0.00365631	0.0038276
RSMH_AZOSB Ribosomal RNA small subunit methyltransferase H OS=Azoarcus sp. (strain BH72) GN=rsmH PE=3 SV=1	Azoarcus sp. BH72	K03438	2.1.1.199		0	0	0	0	0	0	0	0.00315507	0	0	0	0
RSMH_DICNV Ribosomal RNA small subunit methyltransferase H OS=Dichelobacter nodosus (strain VCS1703A) GN=rsmH PE=3 SV=1	Dichelobacter nodosus VCS1703A	K03438	2.1.1.199		0	0	0	0	0	0	0	0	0.0043262	0	0.00365631	0.0038276
RSMH_STRCO Ribosomal RNA small subunit methyltransferase H OS=Streptomyces coelicolor (strain ATCC BAA-471 / A3(2) / M145) GN=rsmH PE=3 SV=1	root	K03438	2.1.1.199		0	0	0	0	0	0	0	0	0	0.0036735	0.00365631	0
RSMH_STRGG Ribosomal RNA small subunit methyltransferase H OS=Streptomyces griseus subsp. griseus (strain JCM 4626 / NBRC 13350) GN=rsmH PE=3 SV=1	root	K03438	2.1.1.199		0	0	0	0	0	0	0	0	0	0.0036735	0.00365631	0
UBIG_METSB Ubiquinone biosynthesis O-methyltransferase OS=Methylocella silvestris (strain BL2 / DSM 15510 / NCIMB 13906) GN=ubiG PE=3 SV=1	Methylocella silvestris BL2	K00568	2.1.1.222 2.1.1.64		0	0	0	0	0	0	0	0	0	0.0036735	0	0
TRMD_BACFR tRNA (guanine-N(1)-)-methyltransferase OS=Bacteroides fragilis (strain YCH46) GN=trmD PE=3 SV=1	Bacteroides	K00554	2.1.1.228		0	0	0	0	0	0	0	0	0	0	0	0
TRMD_TRIEI tRNA (guanine-N(1)-)-methyltransferase OS=Trichodesmium erythraeum (strain IMS101) GN=trmD PE=3 SV=1	Trichodesmium erythraeum IMS101	K00554	2.1.1.228		0	0	0	0	0	0	0	0.00315507	0	0	0	0
TRMD_VIBTL tRNA (guanine-N(1)-)-methyltransferase OS=Vibrio tasmaniensis (strain LGP32) GN=trmD PE=3 SV=1	Vibrio splendidus LGP32	K00554	2.1.1.228		0	0	0	0	0	0	0	0	0.0043262	0	0	0
TRM5_YEAST tRNA (guanine(37)-N1)-methyltransferase OS=Saccharomyces cerevisiae (strain ATCC 204508 / S288c) GN=TRM5 PE=1 SV=1	Saccharomyces cerevisiae S288c	K15429	2.1.1.228		0	0	0	0	0	0.00473393	0	0	0	0	0	0
TRM5_POLPA tRNA (guanine(37)-N1)-methyltransferase OS=Polysphondylium pallidum GN=trmt5 PE=3 SV=1	Polysphondylium pallidum	-	2.1.1.228		0	0	0	0	0	0	0	0	0	0	0.00731261	0
GAMT1_ARATH Gibberellic acid methyltransferase 1 OS=Arabidopsis thaliana GN=GAMT1 PE=1 SV=1	Arabidopsis thaliana	K18885	2.1.1.275		0	0	0	0	0.00466331	0	0	0	0	0	0	0
TYW3_METJA tRNA(Phe) 7-((3-amino-3-carboxypropyl)-4-demethylwyosine(37)-N(4))-methyltransferase OS=Methanocaldococcus jannaschii (strain ATCC 43067 / DSM 2661 / JAL-1 / JCM 10045 / NBRC 100440) GN=taw3 PE=3 SV=1	Methanocaldococcus jannaschii DSM 2661	K15450	2.1.1.282		0	0	0	0	0	0	0	0	0.0043262	0	0	0
BQMT2_ORYSJ 2-methyl-6-phytyl-1,4-hydroquinone methyltransferase 2, chloroplastic OS=Oryza sativa subsp. japonica GN=Os12g0615400 PE=2 SV=2	Streptophyta	K12502	2.1.1.295		0	0	0	0	0	0	0	0	0	0	0	0
BQMT_ARATH 2-methyl-6-phytyl-1,4-hydroquinone methyltransferase, chloroplastic OS=Arabidopsis thaliana GN=VTE3 PE=1 SV=1	Streptophyta	K12502	2.1.1.295		0	0	0	0	0	0	0	0	0	0	0	0
DPH5_HUMAN Diphthine methyl ester synthase OS=Homo sapiens GN=DPH5 PE=1 SV=2	root	K00586	2.1.1.314		0	0	0	0	0	0	0	0	0	0	0	0
TRMB_OENOB tRNA (guanine-N(7)-)-methyltransferase OS=Oenococcus oeni (strain ATCC BAA-331 / PSU-1) GN=trmB PE=3 SV=1	Oenococcus oeni PSU-1	K03439	2.1.1.33		0	0	0	0	0	0	0	0	0	0	0	0
TRMB_BRADU tRNA (guanine-N(7)-)-methyltransferase OS=Bradyrhizobium diazoefficiens (strain JCM 10833 / IAM 13628 / NBRC 14792 / USDA 110) GN=trmB PE=3 SV=1	Bradyrhizobium japonicum USDA 110	K03439	2.1.1.33		0	0	0	0	0	0	0	0	0	0	0	0
TRMB_RHOBA tRNA (guanine-N(7)-)-methyltransferase OS=Rhodopirellula baltica (strain DSM 10527 / NCIMB 13988 / SH1) GN=trmB PE=3 SV=1	root	K03439	2.1.1.33		0	0	0	0	0	0	0	0	0	0.0036735	0.00365631	0
MTH3_HAEAE Modification methylase HaeIII OS=Haemophilus aegyptius GN=haeIIIM PE=1 SV=1	Haemophilus aegyptius	-	2.1.1.37		0	0	0	0	0	0.00473393	0	0	0	0	0	0
DNMT2_ARATH DNA (cytosine-5)-methyltransferase 2 OS=Arabidopsis thaliana GN=MET2 PE=2 SV=1	Arabidopsis thaliana	K00558	2.1.1.37		0	0	0	0	0	0	0	0	0	0	0	0
ASH1_DROME Histone-lysine N-methyltransferase ash1 OS=Drosophila melanogaster GN=ash1 PE=1 SV=3	Drosophila melanogaster	K06101	2.1.1.43		0	0	0	0.00466242	0	0	0	0	0	0	0	0
KMT2C_HUMAN Histone-lysine N-methyltransferase 2C OS=Homo sapiens GN=KMT2C PE=1 SV=3	Homo sapiens	K09188	2.1.1.43		0	0	0	0	0	0	0.00497934	0	0	0	0	0
MNMC_PHOPR tRNA 5-methylaminomethyl-2-thiouridine biosynthesis bifunctional protein MnmC OS=Photobacterium profundum (strain SS9) GN=mnmC PE=3 SV=1	Photobacterium profundum SS9	K15461	2.1.1.61 1.5.-.-		0	0	0	0	0	0	0	0	0	0	0	0.0038276
COQ3_RAT Ubiquinone biosynthesis O-methyltransferase, mitochondrial OS=Rattus norvegicus GN=Coq3 PE=2 SV=2	Muridae	K00591	2.1.1.64 2.1.1.114		0	0	0	0	0	0	0	0	0	0	0	0
COQ3_MOUSE Ubiquinone biosynthesis O-methyltransferase, mitochondrial OS=Mus musculus GN=Coq3 PE=1 SV=1	Muridae	K00591	2.1.1.64 2.1.1.114		0	0	0	0	0	0	0	0	0	0	0	0
MTR1_PBCVX Modification methylase CviRI OS=Paramecium bursaria Chlorella virus XZ-6E GN=CVIRIM PE=3 SV=1	Paramecium bursaria Chlorella virus CV-XZ6E	-	2.1.1.72		0	0	0	0	0	0	0	0.00315507	0	0	0	0
MG: Methylenetetrahydrofolate--tRNA-(uracil-5-)-methyltransferase TrmFO OS=Dictyoglomus turgidum (strain Z-1310 / DSM 6724) GN=trmFO PE=3 SV=1 [B8E2F5] Score: 54.3	Dictyoglomus turgidum DSM 6724	K04094	2.1.1.74		0	0	0	0	0	0	0.00497934	0.00315507	0	0.0036735	0.00365631	0.0038276
PIMT_RHOS5 Protein-L-isoaspartate O-methyltransferase OS=Rhodobacter sphaeroides (strain ATCC 17025 / ATH 2.4.3) GN=pcm PE=3 SV=1	Rhodobacter sphaeroides ATCC 17025	K00573	2.1.1.77		0	0	0	0	0	0	0	0.00315507	0	0	0	0
PIMT_XANAC Protein-L-isoaspartate O-methyltransferase OS=Xanthomonas axonopodis pv. citri (strain 306) GN=pcm PE=3 SV=1	Xanthomonas axonopodis pv. citri str. 306	K00573	2.1.1.77		0	0	0	0	0	0	0	0	0	0.0036735	0	0
MTRH_METMA Tetrahydromethanopterin S-methyltransferase subunit H OS=Methanosarcina mazei (strain ATCC BAA-159 / DSM 3647 / Goe1 / Go1 / JCM 11833 / OCM 88) GN=mtrH PE=1 SV=3	Methanosarcina	K00584	2.1.1.86		0	0.00938394	0.00557877	0.0139873	0	0	0	0	0	0	0	0
DPHB_HALWD Diphthine synthase OS=Haloquadratum walsbyi (strain DSM 16790 / HBSQ001) GN=dphB PE=3 SV=1	Haloquadratum walsbyi DSM 16790	K00586	2.1.1.98		0	0	0	0	0	0	0.00497934	0.00315507	0.0043262	0	0	0
GLYA_CENSY Serine hydroxymethyltransferase OS=Cenarchaeum symbiosum (strain A) GN=glyA PE=3 SV=1	Cenarchaeum symbiosum A	K00600	2.1.2.-		0.00541859	0	0	0	0	0.00473393	0	0	0	0	0	0
PURT_VARPS Phosphoribosylglycinamide formyltransferase 2 OS=Variovorax paradoxus (strain S110) GN=purT PE=3 SV=1	Variovorax paradoxus S110	K08289	2.1.2.-		0	0	0	0	0	0	0	0	0	0	0	0
PURT_VIBF1 Phosphoribosylglycinamide formyltransferase 2 OS=Vibrio fischeri (strain ATCC 700601 / ES114) GN=purT PE=3 SV=1	Vibrio fischeri ES114	K08289	2.1.2.-		0	0	0	0	0	0	0	0.00315507	0	0	0	0
GLYA_CYAP8 Serine hydroxymethyltransferase OS=Cyanothece sp. (strain PCC 8801) GN=glyA PE=3 SV=1	Cyanothece sp. PCC 8801	K00600	2.1.2.1		0	0	0	0	0	0.00473393	0.00497934	0.00315507	0	0	0	0
GLYA_STAS1 Serine hydroxymethyltransferase OS=Staphylococcus saprophyticus subsp. saprophyticus (strain ATCC 15305 / DSM 20229) GN=glyA PE=3 SV=1	Bacteria	K00600	2.1.2.1		0	0	0	0	0	0	0.00497934	0	0	0	0	0
GLYA_LACAC Serine hydroxymethyltransferase OS=Lactobacillus acidophilus (strain ATCC 700396 / NCK56 / N2 / NCFM) GN=glyA PE=3 SV=1	Bacteria	K00600	2.1.2.1		0	0	0	0	0	0	0.00497934	0	0	0	0	0
GLYA_CLOP1 Serine hydroxymethyltransferase OS=Clostridium perfringens (strain ATCC 13124 / DSM 756 / JCM 1290 / NCIMB 6125 / NCTC 8237 / Type A) GN=glyA PE=3 SV=1	Bacteria	K00600	2.1.2.1		0	0	0	0	0	0	0.00497934	0	0	0	0	0
GLYM_NEUCR Putative serine hydroxymethyltransferase, mitochondrial OS=Neurospora crassa (strain ATCC 24698 / 74-OR23-1A / CBS 708.71 / DSM 1257 / FGSC 987) GN=cbs-2 PE=3 SV=2	Neurospora crassa OR74A	K00600	2.1.2.1		0	0	0	0	0	0	0.00497934	0	0	0	0	0
GLYM2_ARATH Serine hydroxymethyltransferase 2, mitochondrial OS=Arabidopsis thaliana GN=SHM2 PE=2 SV=2	Arabidopsis thaliana	K00600	2.1.2.1		0	0	0	0	0	0	0	0	0	0	0	0
GLYM1_ARATH Serine hydroxymethyltransferase 1, mitochondrial OS=Arabidopsis thaliana GN=SHM1 PE=1 SV=1	root	K00600	2.1.2.1		0	0	0	0	0	0	0	0	0	0	0	0
GLYM1_FLAPR Serine hydroxymethyltransferase 1, mitochondrial OS=Flaveria pringlei PE=2 SV=1	root	-	2.1.2.1		0	0	0	0	0	0	0	0	0	0	0	0
PANB_MYCTO 3-methyl-2-oxobutanoate hydroxymethyltransferase OS=Mycobacterium tuberculosis (strain CDC 1551 / Oshkosh) GN=panB PE=3 SV=1	Mycobacterium	K00606	2.1.2.11		0	0	0	0	0	0	0	0	0	0	0	0
PANB_BACV8 3-methyl-2-oxobutanoate hydroxymethyltransferase OS=Bacteroides vulgatus (strain ATCC 8482 / DSM 1447 / JCM 5826 / NBRC 14291 / NCTC 11154) GN=panB PE=3 SV=1	Bacteroides vulgatus ATCC 8482	K00606	2.1.2.11		0	0	0	0	0	0	0	0	0	0	0	0
ARNA_PHOLL Bifunctional polymyxin resistance protein ArnA OS=Photorhabdus luminescens subsp. laumondii (strain DSM 15139 / CIP 105565 / TT01) GN=arnA PE=3 SV=1	Photorhabdus luminescens subsp. laumondii TTO1	K10011	2.1.2.13 1.1.1.305		0	0	0	0	0	0	0	0	0	0	0	0
PUR9_STRSU Bifunctional purine biosynthesis protein PurH OS=Streptococcus suis GN=purH PE=3 SV=1	Streptococcus suis	K00602	2.1.2.3 3.5.4.10		0	0	0	0	0	0	0	0	0	0	0	0
GLFT_STRP1 Glutamate formimidoyltransferase OS=Streptococcus pyogenes serotype M1 GN=M5005_Spy1772 PE=1 SV=1	Streptococcus pyogenes serotype M1	K00603	2.1.2.5 6.3.3.2		0	0	0	0	0	0	0	0	0	0	0	0
FMT_THEFY Methionyl-tRNA formyltransferase OS=Thermobifida fusca (strain YX) GN=fmt PE=3 SV=1	Thermobifida fusca YX	K00604	2.1.2.9		0	0	0	0	0	0	0	0	0	0	0	0
FMT_LACJO Methionyl-tRNA formyltransferase OS=Lactobacillus johnsonii (strain CNCM I-12250 / La1 / NCC 533) GN=fmt PE=3 SV=1	Lactobacillus johnsonii NCC 533	K00604	2.1.2.9		0	0	0	0	0	0	0	0	0	0	0	0
12S_PROFR Methylmalonyl-CoA carboxyltransferase 12S subunit OS=Propionibacterium freudenreichii subsp. shermanii PE=1 SV=3	Propionibacterium freudenreichii subsp. shermanii	-	2.1.3.1		0.00541859	0.00469197	0.0167363	0.00466242	0.00466331	0.00473393	0.00497934	0	0	0.0036735	0.00365631	0.00765521
PYRB_MYCBO Aspartate carbamoyltransferase OS=Mycobacterium bovis (strain ATCC BAA-935 / AF2122/97) GN=pyrB PE=3 SV=1	Mycobacterium	K00609	2.1.3.2		0	0	0	0	0	0	0	0	0	0	0	0
PYRB_LACGA Aspartate carbamoyltransferase OS=Lactobacillus gasseri (strain ATCC 33323 / DSM 20243 / JCM 1131 / NCIMB 11718 / AM63) GN=pyrB PE=3 SV=2	Lactobacillus gasseri ATCC 33323	K00609	2.1.3.2		0	0	0	0	0	0	0	0	0	0.0036735	0	0
PYRB_DESHY Aspartate carbamoyltransferase OS=Desulfitobacterium hafniense (strain Y51) GN=pyrB PE=3 SV=1	Desulfitobacterium hafniense	K00609	2.1.3.2		0	0	0	0	0	0	0	0	0	0.007347	0	0
PYRB_SHISS Aspartate carbamoyltransferase OS=Shigella sonnei (strain Ss046) GN=pyrB PE=3 SV=1	Shigella sonnei Ss046	K00609	2.1.3.2		0	0	0	0	0	0	0	0.00315507	0.0043262	0	0	0
PYRB_PSEMY Aspartate carbamoyltransferase OS=Pseudomonas mendocina (strain ymp) GN=pyrB PE=3 SV=1	Pseudomonadaceae	K00609	2.1.3.2		0	0	0	0	0	0	0	0	0	0	0	0
PYRB_BUCAP Aspartate carbamoyltransferase OS=Buchnera aphidicola subsp. Schizaphis graminum (strain Sg) GN=pyrB PE=3 SV=1	Gammaproteobacteria	K00609	2.1.3.2		0	0	0	0	0	0	0	0	0.0043262	0	0	0
PYRB_YERPY Aspartate carbamoyltransferase OS=Yersinia pseudotuberculosis serotype O:3 (strain YPIII) GN=pyrB PE=3 SV=1	Gammaproteobacteria	K00609	2.1.3.2		0	0	0	0	0	0	0	0	0.0043262	0	0	0
OTC_PROAC Ornithine carbamoyltransferase OS=Propionibacterium acnes (strain KPA171202 / DSM 16379) GN=argF PE=3 SV=1	Propionibacterium acnes KPA171202	K00611	2.1.3.3		0	0	0	0	0	0	0	0.00631014	0.00865239	0.0036735	0.00365631	0.0038276
OTCC_LACLM Ornithine carbamoyltransferase, catabolic OS=Lactococcus lactis subsp. cremoris (strain MG1363) GN=arcB PE=3 SV=1	Lactococcus lactis	K00611	2.1.3.3		0	0	0	0	0	0	0	0	0	0	0	0
OTC_SHIDS Ornithine carbamoyltransferase OS=Shigella dysenteriae serotype 1 (strain Sd197) GN=argI PE=3 SV=1	Shigella	K00611	2.1.3.3		0	0	0	0	0	0	0	0	0.0043262	0	0	0
MOEA1_MYCTO Molybdopterin molybdenumtransferase 1 OS=Mycobacterium tuberculosis (strain CDC 1551 / Oshkosh) GN=moeA1 PE=3 SV=1	Mycobacterium tuberculosis	K03750	2.10.1.1		0	0	0	0	0	0	0	0	0	0	0	0
MG: Putative transketolase C-terminal section OS=Methanocaldococcus jannaschii (strain ATCC 43067 / DSM 2661 / JAL-1 / JCM 10045 / NBRC 100440) GN=MJ0679 PE=5 SV=1 [Q58092] Score: 302.0	Methanocaldococcus jannaschii DSM 2661	K00615	2.2.1.1		0	0	0	0	0	0	0	0.00315507	0	0	0	0
MG: Putative transketolase N-terminal section OS=Methanocaldococcus jannaschii (strain ATCC 43067 / DSM 2661 / JAL-1 / JCM 10045 / NBRC 100440) GN=MJ0681 PE=5 SV=1 [Q58094] Score: 251.0	Methanocaldococcus jannaschii DSM 2661	K00615	2.2.1.1		0	0	0	0	0	0	0	0	0	0.0036735	0	0.0038276
TKT_STRPN Probable transketolase OS=Streptococcus pneumoniae serotype 4 (strain ATCC BAA-334 / TIGR4) GN=tkt PE=3 SV=2	Streptococcus pneumoniae TIGR4	K00615	2.2.1.1		0	0	0	0	0	0	0	0	0	0	0	0
TKT_STRP8 Transketolase OS=Streptococcus pyogenes serotype M18 (strain MGAS8232) GN=tkt PE=3 SV=1	Streptococcus pyogenes	K00615	2.2.1.1		0	0	0	0	0	0	0	0	0	0	0	0
TKT1_ECOLI Transketolase 1 OS=Escherichia coli (strain K12) GN=tktA PE=1 SV=5	Escherichia coli K-12	K00615	2.2.1.1		0	0	0	0	0	0	0.0248967	0.0252406	0.0475881	0.0036735	0	0.0229656
TKTC1_ARATH Transketolase-1, chloroplastic OS=Arabidopsis thaliana GN=TKL-1 PE=1 SV=1	Streptophyta	-	2.2.1.1		0	0	0	0	0	0	0	0	0	0	0	0
ADHS_META3 2-amino-3,7-dideoxy-D-threo-hept-6-ulosonate synthase OS=Methanococcus aeolicus (strain Nankai-3 / ATCC BAA-1280) GN=aroA PE=3 SV=1	Methanococcus aeolicus Nankai-3	K16306	2.2.1.10		0	0	0	0	0	0	0	0	0	0	0	0
TAL2_STRAW Transaldolase 2 OS=Streptomyces avermitilis (strain ATCC 31267 / DSM 46492 / JCM 5070 / NBRC 14893 / NCIMB 12804 / NRRL 8165 / MA-4680) GN=tal2 PE=3 SV=1	Streptomyces avermitilis MA-4680	K00616	2.2.1.2		0	0	0	0	0	0	0	0	0	0.0036735	0	0
TAL_YERE8 Transaldolase OS=Yersinia enterocolitica serotype O:8 / biotype 1B (strain NCTC 13174 / 8081) GN=tal PE=3 SV=1	Enterobacteriaceae	K00616	2.2.1.2		0	0.00469197	0	0.00932484	0.00932662	0.00946786	0.029876	0.0283956	0.021631	0.014694	0.0109689	0.0038276
TAL_SHIDS Transaldolase OS=Shigella dysenteriae serotype 1 (strain Sd197) GN=tal PE=3 SV=1	Enterobacteriaceae	K00616	2.2.1.2		0.00541859	0.0140759	0.00557877	0.0233121	0.0139899	0.0284036	0.0647314	0.0599464	0.0519143	0.022041	0.0182815	0.0153104
TAL_ACTP7 Transaldolase OS=Actinobacillus pleuropneumoniae serotype 7 (strain AP76) GN=tal PE=3 SV=1	Pasteurellaceae	K00616	2.2.1.2		0	0	0	0.00932484	0.00466331	0.00473393	0.0248967	0.0220855	0.0129786	0.007347	0.00365631	0
TAL_SHEAM Transaldolase OS=Shewanella amazonensis (strain ATCC BAA-1098 / SB2B) GN=tal PE=3 SV=1	Proteobacteria	K00616	2.2.1.2		0	0	0	0	0	0.00473393	0.014938	0.0157754	0.0043262	0	0.00365631	0
TAL_ALISL Transaldolase OS=Aliivibrio salmonicida (strain LFI1238) GN=tal PE=3 SV=1	Proteobacteria	K00616	2.2.1.2		0	0	0	0	0	0.00473393	0.014938	0.0157754	0.0043262	0	0.00365631	0
TAL_PHOPR Transaldolase OS=Photobacterium profundum (strain SS9) GN=tal PE=3 SV=1	Proteobacteria	K00616	2.2.1.2		0	0	0	0.00932484	0.00466331	0.00946786	0.0199173	0.0220855	0.0129786	0.007347	0.00731261	0
TALA_ECOL6 Transaldolase A OS=Escherichia coli O6:H1 (strain CFT073 / ATCC 700928 / UPEC) GN=talA PE=3 SV=1	Proteobacteria	K00616	2.2.1.2		0	0	0	0.00932484	0.00466331	0.00946786	0.029876	0.0378609	0.0389358	0.014694	0.00731261	0
MG: Probable transaldolase OS=Eubacterium rectale (strain ATCC 33656 / VPI 0990) GN=tal PE=3 SV=1 [C4ZF71] Score: 346.0	Bacteria	K00616	2.2.1.2		0	0	0	0	0	0	0	0	0	0	0	0
ILVB_BACSU Acetolactate synthase large subunit OS=Bacillus subtilis (strain 168) GN=ilvB PE=1 SV=4	Bacillus subtilis subsp. subtilis str. 168	K01652	2.2.1.6		0	0	0	0	0	0	0	0	0	0	0	0
ILVH_ECOLI Acetolactate synthase isozyme 3 small subunit OS=Escherichia coli (strain K12) GN=ilvH PE=1 SV=3	Gammaproteobacteria	K01653	2.2.1.6		0	0	0	0	0	0	0	0	0	0	0	0
DXS_CYAP8 1-deoxy-D-xylulose-5-phosphate synthase OS=Cyanothece sp. (strain PCC 8801) GN=dxs PE=3 SV=1	Cyanothece sp. PCC 8801	K01662	2.2.1.7		0	0	0	0	0	0	0	0	0	0	0	0
DXS_BRUA1 1-deoxy-D-xylulose-5-phosphate synthase OS=Brucella abortus (strain S19) GN=dxs PE=3 SV=1	Brucella	K01662	2.2.1.7		0	0	0	0	0	0	0.00497934	0	0	0	0	0
DXS_AGRRK 1-deoxy-D-xylulose-5-phosphate synthase OS=Agrobacterium radiobacter (strain K84 / ATCC BAA-868) GN=dxs PE=3 SV=1	Rhizobiaceae	K01662	2.2.1.7		0	0	0	0	0	0	0	0	0	0	0	0
DXS_SHEON 1-deoxy-D-xylulose-5-phosphate synthase OS=Shewanella oneidensis (strain MR-1) GN=dxs PE=3 SV=1	Shewanella oneidensis MR-1	K01662	2.2.1.7		0	0	0	0	0.00466331	0	0	0	0	0	0	0
MEND_KINRD 2-succinyl-5-enolpyruvyl-6-hydroxy-3-cyclohexene-1-carboxylate synthase OS=Kineococcus radiotolerans (strain ATCC BAA-149 / DSM 14245 / SRS30216) GN=menD PE=3 SV=1	Kineococcus radiotolerans SRS30216	K02551	2.2.1.9		0	0	0	0	0	0	0	0.00315507	0	0	0	0
MEND_STAAW 2-succinyl-5-enolpyruvyl-6-hydroxy-3-cyclohexene-1-carboxylate synthase OS=Staphylococcus aureus (strain MW2) GN=menD PE=3 SV=1	Staphylococcus aureus subsp. aureus MW2	-	2.2.1.9		0	0	0	0	0	0	0	0.00315507	0	0	0	0
MEND_ACTSZ 2-succinyl-5-enolpyruvyl-6-hydroxy-3-cyclohexene-1-carboxylate synthase OS=Actinobacillus succinogenes (strain ATCC 55618 / 130Z) GN=menD PE=3 SV=1	Actinobacillus succinogenes 130Z	K02551	2.2.1.9		0	0	0	0	0	0	0	0	0	0	0	0
LNT_MYCS2 Apolipoprotein N-acyltransferase OS=Mycobacterium smegmatis (strain ATCC 700084 / mc(2)155) GN=lnt PE=1 SV=2	Mycobacterium smegmatis str. MC2 155	K03820	2.3.1.-		0.00541859	0	0.00557877	0	0	0	0	0	0	0	0	0
MYCA_BACIU Mycosubtilin synthase subunit A OS=Bacillus subtilis GN=mycA PE=3 SV=1	Bacillus subtilis	-	2.3.1.-		0	0	0	0	0	0	0	0	0	0	0	0
LPXD_RUEPO UDP-3-O-acylglucosamine N-acyltransferase OS=Ruegeria pomeroyi (strain ATCC 700808 / DSM 15171 / DSS-3) GN=lpxD PE=3 SV=1	Ruegeria pomeroyi DSS-3	K02536	2.3.1.-		0	0	0	0	0	0	0	0	0	0	0	0
MLCA_PENCI Compactin nonaketide synthase mokA OS=Penicillium citrinum GN=mlcA PE=1 SV=1	Penicillium citrinum	-	2.3.1.-		0	0	0	0	0	0	0	0	0	0	0	0
PKS13_DICDI Probable polyketide synthase 13 OS=Dictyostelium discoideum GN=pks13 PE=3 SV=1	Dictyostelium discoideum	-	2.3.1.-		0	0	0	0	0	0	0	0	0.0043262	0	0	0
BAHD2_ARATH BAHD acyltransferase At3g29680 OS=Arabidopsis thaliana GN=At3g29680 PE=2 SV=1	Arabidopsis thaliana	-	2.3.1.-		0.0108372	0	0	0	0	0	0	0	0	0	0.0146252	0
YR151_MIMIV Uncharacterized acetyltransferase R151 OS=Acanthamoeba polyphaga mimivirus GN=MIMI_R151 PE=3 SV=1	Acanthamoeba polyphaga mimivirus	-	2.3.1.-		0	0	0	0	0.00466331	0	0	0	0	0	0	0
ARGA_BUCAP Amino-acid acetyltransferase OS=Buchnera aphidicola subsp. Schizaphis graminum (strain Sg) GN=argA PE=3 SV=1	Buchnera aphidicola str. Sg (Schizaphis graminum)	K14682	2.3.1.1		0	0	0	0	0	0	0	0	0	0	0	0
ATAT_LEIIN Alpha-tubulin N-acetyltransferase OS=Leishmania infantum GN=LinJ25.1190 PE=3 SV=1	root	K19573	2.3.1.108		0	0	0	0	0	0	0	0	0.0043262	0	0	0
DAPD_LEPCP 2,3,4,5-tetrahydropyridine-2,6-dicarboxylate N-succinyltransferase OS=Leptothrix cholodnii (strain ATCC 51168 / LMG 8142 / SP-6) GN=dapD PE=3 SV=1	Leptothrix cholodnii SP-6	K00674	2.3.1.117		0	0	0	0	0	0	0	0	0	0	0	0
DAPD_METFK 2,3,4,5-tetrahydropyridine-2,6-dicarboxylate N-succinyltransferase OS=Methylobacillus flagellatus (strain KT / ATCC 51484 / DSM 6875) GN=dapD PE=3 SV=1	Proteobacteria	K00674	2.3.1.117		0	0	0	0	0	0.00473393	0.00497934	0	0	0	0	0
DAPD_SHIF8 2,3,4,5-tetrahydropyridine-2,6-dicarboxylate N-succinyltransferase OS=Shigella flexneri serotype 5b (strain 8401) GN=dapD PE=3 SV=1	Proteobacteria	K00674	2.3.1.117		0.00541859	0.00938394	0	0.00466242	0.00932662	0.00946786	0.014938	0.00315507	0.0043262	0	0	0
DAPD_ACTP2 2,3,4,5-tetrahydropyridine-2,6-dicarboxylate N-succinyltransferase OS=Actinobacillus pleuropneumoniae serotype 5b (strain L20) GN=dapD PE=3 SV=1	Proteobacteria	K00674	2.3.1.117		0	0	0	0	0	0.00473393	0.00497934	0	0	0	0	0
DAPD_ALTMD 2,3,4,5-tetrahydropyridine-2,6-dicarboxylate N-succinyltransferase OS=Alteromonas mediterranea (strain DSM 17117 / CIP 110805 / LMG 28347 / Deep ecotype) GN=dapD PE=3 SV=1	Proteobacteria	K00674	2.3.1.117		0	0	0	0	0	0.00473393	0.00497934	0	0	0	0	0
DAPD_SHEAM 2,3,4,5-tetrahydropyridine-2,6-dicarboxylate N-succinyltransferase OS=Shewanella amazonensis (strain ATCC BAA-1098 / SB2B) GN=dapD PE=3 SV=1	Proteobacteria	K00674	2.3.1.117		0	0	0	0	0	0.00473393	0.00497934	0	0	0	0	0
DAPD_MAGSA 2,3,4,5-tetrahydropyridine-2,6-dicarboxylate N-succinyltransferase OS=Magnetospirillum magneticum (strain AMB-1 / ATCC 700264) GN=dapD PE=3 SV=1	Proteobacteria	K00674	2.3.1.117		0	0	0	0	0	0	0	0	0	0	0	0
DAPD_HAES1 2,3,4,5-tetrahydropyridine-2,6-dicarboxylate N-succinyltransferase OS=Haemophilus somnus (strain 129Pt) GN=dapD PE=3 SV=1	Proteobacteria	K00674	2.3.1.117		0	0	0	0	0	0	0	0	0	0	0	0
ODP2_RICBR Dihydrolipoyllysine-residue acetyltransferase component of pyruvate dehydrogenase complex OS=Rickettsia bellii (strain RML369-C) GN=pdhC PE=3 SV=1	Rickettsia bellii RML369-C	K00627	2.3.1.12		0	0	0	0	0	0	0	0	0	0	0	0
ODP2_BUCBP Dihydrolipoyllysine-residue acetyltransferase component of pyruvate dehydrogenase complex OS=Buchnera aphidicola subsp. Baizongia pistaciae (strain Bp) GN=aceF PE=3 SV=1	Buchnera aphidicola str. Bp (Baizongia pistaciae)	K00627	2.3.1.12		0	0	0	0	0	0	0.00497934	0.00315507	0	0	0.00365631	0
ODP2_ECOLI Dihydrolipoyllysine-residue acetyltransferase component of pyruvate dehydrogenase complex OS=Escherichia coli (strain K12) GN=aceF PE=1 SV=3	Escherichia coli K-12	K00627	2.3.1.12		0	0.00469197	0	0	0	0	0	0	0	0	0	0
ODP2_AZOVI Dihydrolipoyllysine-residue acetyltransferase component of pyruvate dehydrogenase complex OS=Azotobacter vinelandii PE=1 SV=3	Azotobacter vinelandii	-	2.3.1.12		0	0.00469197	0	0.00466242	0	0	0	0	0	0	0	0
DPSS_PINSY Pinosylvin synthase OS=Pinus sylvestris PE=1 SV=1	Pinus sylvestris	-	2.3.1.146		0	0	0	0	0	0	0	0	0	0	0.00365631	0
PLSY_SALAR Glycerol-3-phosphate acyltransferase OS=Salmonella arizonae (strain ATCC BAA-731 / CDC346-86 / RSK2980) GN=plsY PE=3 SV=1	Enterobacteriaceae	K08591	2.3.1.15 2.3.1.n5		0.0108372	0	0	0	0	0.00473393	0.00497934	0	0	0	0.00365631	0
THIM_BOVIN 3-ketoacyl-CoA thiolase, mitochondrial OS=Bos taurus GN=ACAA2 PE=2 SV=1	Bos taurus	K07508	2.3.1.16		0	0	0	0	0	0	0	0	0	0	0	0
FABH_PROMM 3-oxoacyl-[acyl-carrier-protein] synthase 3 OS=Prochlorococcus marinus (strain MIT 9313) GN=fabH PE=3 SV=1	Prochlorococcus marinus str. MIT 9313	-	2.3.1.180		0	0	0	0	0	0	0	0	0	0	0	0
LIPB_WOLTR Octanoyltransferase OS=Wolbachia sp. subsp. Brugia malayi (strain TRS) GN=lipB PE=3 SV=1	Wolbachia endosymbiont strain TRS of Brugia malayi	K03801	2.3.1.181		0	0	0	0	0	0.00473393	0	0	0	0	0	0
LIPB_XYLFA Octanoyltransferase OS=Xylella fastidiosa (strain 9a5c) GN=lipB PE=3 SV=1	Xylella fastidiosa	K03801	2.3.1.181		0	0	0	0	0	0	0	0	0.0043262	0	0	0
MG: Phosphate butyryltransferase OS=Clostridium beijerinckii (strain ATCC 51743 / NCIMB 8052) GN=ptb PE=3 SV=1 [Q05624] Score: 452.0	Clostridium beijerinckii NCIMB 8052	K00634	2.3.1.19		0	0	0	0	0	0	0	0	0	0	0	0
PDUL_LACRD Phosphate propanoyltransferase OS=Lactobacillus reuteri (strain DSM 20016) GN=pduL PE=3 SV=1	Lactobacillus reuteri DSM 20016	K13923	2.3.1.222		0	0	0	0	0	0	0	0	0	0	0	0
TSAD_STRT1 tRNA N6-adenosine threonylcarbamoyltransferase OS=Streptococcus thermophilus (strain CNRZ 1066) GN=tsaD PE=3 SV=1	Streptococcus thermophilus	K01409	2.3.1.234		0	0	0	0	0	0	0	0	0	0	0	0
TSAD_XANAC tRNA N6-adenosine threonylcarbamoyltransferase OS=Xanthomonas axonopodis pv. citri (strain 306) GN=tsaD PE=3 SV=1	Xanthomonas	K01409	2.3.1.234		0	0	0	0	0	0	0	0	0	0	0	0
KAE1_CRYNJ tRNA N6-adenosine threonylcarbamoyltransferase OS=Cryptococcus neoformans var. neoformans serotype D (strain JEC21 / ATCC MYA-565) GN=KAE1 PE=3 SV=1	Cryptococcus neoformans	K01409	2.3.1.234		0	0	0	0	0	0	0	0	0	0	0.00365631	0
MG: Serine acetyltransferase OS=Helicobacter pylori (strain ATCC 700392 / 26695) GN=cysE PE=3 SV=2 [P71405] Score: 237.0	Helicobacter pylori 26695	K00640	2.3.1.30		0	0	0	0	0	0	0	0.00315507	0.0043262	0	0	0.0038276
METX_METPP Homoserine O-acetyltransferase OS=Methylibium petroleiphilum (strain PM1) GN=metX PE=3 SV=1	Methylibium petroleiphilum PM1	K00641	2.3.1.31		0	0	0	0	0	0	0	0	0	0	0	0
ARGJ_CORDI Arginine biosynthesis bifunctional protein ArgJ OS=Corynebacterium diphtheriae (strain ATCC 700971 / NCTC 13129 / Biotype gravis) GN=argJ PE=3 SV=1	Corynebacterium diphtheriae NCTC 13129	K00620	2.3.1.35 2.3.1.1		0	0	0	0	0	0	0	0	0	0	0	0
ARGJ_BIFLO Arginine biosynthesis bifunctional protein ArgJ OS=Bifidobacterium longum (strain NCC 2705) GN=argJ PE=3 SV=1	Bifidobacterium longum NCC2705	K00620	2.3.1.35 2.3.1.1		0	0	0	0	0	0	0	0	0	0	0	0
ARGJ_SYMTH Arginine biosynthesis bifunctional protein ArgJ OS=Symbiobacterium thermophilum (strain T / IAM 14863) GN=argJ PE=3 SV=1	Symbiobacterium thermophilum IAM 14863	K00620	2.3.1.35 2.3.1.1		0	0	0	0	0	0	0	0	0	0	0	0
ARGJ_PSEPF Arginine biosynthesis bifunctional protein ArgJ OS=Pseudomonas fluorescens (strain Pf0-1) GN=argJ PE=3 SV=1	Pseudomonas fluorescens Pf0-1	K00620	2.3.1.35 2.3.1.1		0	0	0	0	0	0	0	0	0	0.0036735	0	0.0038276
ARGJ_THENN Arginine biosynthesis bifunctional protein ArgJ OS=Thermotoga neapolitana (strain ATCC 49049 / DSM 4359 / NS-E) GN=argJ PE=1 SV=2	Thermotoga neapolitana DSM 4359	K00620	2.3.1.35 2.3.1.1		0	0	0	0	0	0.00473393	0	0	0	0	0	0
ARGJ_PICPG Arginine biosynthesis bifunctional protein ArgJ, mitochondrial OS=Komagataella pastoris (strain GS115 / ATCC 20864) GN=PAS_chr3_0176 PE=3 SV=1	Komagataella pastoris GS115	K00620	2.3.1.35 2.3.1.1		0	0	0	0	0	0	0	0	0	0	0	0
FABD_ECOLI Malonyl CoA-acyl carrier protein transacylase OS=Escherichia coli (strain K12) GN=fabD PE=1 SV=2	Escherichia coli	K00645	2.3.1.39		0	0	0	0	0	0	0	0.00946522	0.0043262	0.0036735	0.00731261	0
FABB_ECOLI 3-oxoacyl-[acyl-carrier-protein] synthase 1 OS=Escherichia coli (strain K12) GN=fabB PE=1 SV=1	Escherichia coli	K00647	2.3.1.41		0	0	0	0	0	0	0	0	0	0	0	0
OXSM_MOUSE 3-oxoacyl-[acyl-carrier-protein] synthase, mitochondrial OS=Mus musculus GN=Oxsm PE=1 SV=1	Mus musculus	K09458	2.3.1.41		0	0	0	0	0	0	0	0	0	0	0	0
LCAT_MOUSE Phosphatidylcholine-sterol acyltransferase OS=Mus musculus GN=Lcat PE=1 SV=2	Mus musculus	K00650	2.3.1.43		0	0	0	0	0	0	0.00497934	0.00315507	0	0	0	0
META_RHOSK Homoserine O-succinyltransferase OS=Rhodobacter sphaeroides (strain KD131 / KCTC 12085) GN=metA PE=3 SV=1	Rhodobacter sphaeroides	K00651	2.3.1.46		0	0	0	0	0	0	0	0	0	0	0	0
BIOF_CITK8 8-amino-7-oxononanoate synthase OS=Citrobacter koseri (strain ATCC BAA-895 / CDC 4225-83 / SGSC4696) GN=bioF PE=3 SV=1	Citrobacter koseri ATCC BAA-895	K00652	2.3.1.47		0	0	0	0	0	0	0	0	0	0	0	0
GCN5_YEAST Histone acetyltransferase GCN5 OS=Saccharomyces cerevisiae (strain ATCC 204508 / S288c) GN=GCN5 PE=1 SV=1	Saccharomyces cerevisiae S288c	K06062	2.3.1.48		0	0	0	0	0	0	0	0	0	0	0	0
MBD9_ARATH Methyl-CpG-binding domain-containing protein 9 OS=Arabidopsis thaliana GN=MBD9 PE=2 SV=1	Arabidopsis thaliana	-	2.3.1.48		0	0.00469197	0	0	0.00466331	0	0	0	0	0	0	0
PFL_LACLA Formate acetyltransferase OS=Lactococcus lactis subsp. lactis (strain IL1403) GN=pfl PE=3 SV=1	Lactococcus lactis subsp. lactis Il1403	K00656	2.3.1.54		0.00541859	0	0.072524	0	0	0	0	0	0	0	0	0
MG: Formate acetyltransferase OS=Clostridium pasteurianum GN=pfl PE=3 SV=1 [Q46266] Score: 301.0	Bacteria	-	2.3.1.54		0.0758602	0.0797635	0.156206	0.111898	0.102593	0.137284	0.07469	0.0410159	0.0735453	0.0551025	0.0438757	0.0421037
ODO2_ECOLI Dihydrolipoyllysine-residue succinyltransferase component of 2-oxoglutarate dehydrogenase complex OS=Escherichia coli (strain K12) GN=sucB PE=1 SV=2	Escherichia coli	K00658	2.3.1.61		0.0162558	0.0140759	0	0.0139873	0.00932662	0.0189357	0.00497934	0.00315507	0.0043262	0	0	0
CHSY_MATIN Chalcone synthase OS=Matthiola incana GN=CHS PE=2 SV=1	Matthiola incana	-	2.3.1.74		0	0	0	0	0	0	0	0	0	0	0	0
MG: Phosphate acetyltransferase OS=Clostridium acetobutylicum (strain ATCC 824 / DSM 792 / JCM 1419 / LMG 5710 / VKM B-1787) GN=pta PE=3 SV=2 [P71103] Score: 467.0	Clostridium acetobutylicum ATCC 824	K00625	2.3.1.8		0	0	0	0	0	0	0.00497934	0.00315507	0.0043262	0	0.0109689	0.0038276
PTA_ECOLI Phosphate acetyltransferase OS=Escherichia coli (strain K12) GN=pta PE=1 SV=2	Enterobacteriaceae	K13788	2.3.1.8		0	0.00469197	0	0.00466242	0	0	0.0846487	0.0788768	0.108155	0.0624495	0.0438757	0.114828
MG: Phosphate acetyltransferase OS=Bacillus subtilis (strain 168) GN=pta PE=1 SV=3 [P39646] Score: 397.0	Bacteria	K00625	2.3.1.8		0	0	0	0	0	0	0	0	0	0	0	0
PTAS_BORBU Phosphate acetyltransferase OS=Borrelia burgdorferi (strain ATCC 35210 / B31 / CIP 102532 / DSM 4680) GN=pta PE=3 SV=1	Bacteria	K00625	2.3.1.8		0	0	0	0	0	0	0	0	0	0	0	0
PTA_DEIRA Phosphate acetyltransferase OS=Deinococcus radiodurans (strain ATCC 13939 / DSM 20539 / JCM 16871 / LMG 4051 / NBRC 15346 / NCIMB 9279 / R1 / VKM B-1422) GN=pta PE=3 SV=2	Bacteria	K13788	2.3.1.8		0	0	0	0	0	0	0	0.00631014	0.0129786	0	0	0
PTA_NITEU Phosphate acetyltransferase OS=Nitrosomonas europaea (strain ATCC 19718 / NBRC 14298) GN=pta PE=3 SV=1	Bacteria	K13788	2.3.1.8		0	0	0	0	0	0	0	0	0.0043262	0	0	0
DNAT_DROME Dopamine N-acetyltransferase OS=Drosophila melanogaster GN=Dat PE=1 SV=1	Drosophila melanogaster	K00669	2.3.1.87		0	0	0	0	0	0	0	0	0	0	0	0
DAPH_STRPI 2,3,4,5-tetrahydropyridine-2,6-dicarboxylate N-acetyltransferase OS=Streptococcus pneumoniae (strain Hungary19A-6) GN=dapH PE=3 SV=1	Streptococcaceae	K00674	2.3.1.89		0	0	0	0	0.00466331	0	0.00497934	0.00315507	0.0043262	0.0036735	0.00365631	0
MG: Acetyl-CoA acetyltransferase OS=Clostridium acetobutylicum (strain ATCC 824 / DSM 792 / JCM 1419 / LMG 5710 / VKM B-1787) GN=thlA PE=1 SV=1 [P45359] Score: 220.0	Clostridium acetobutylicum ATCC 824	K00626	2.3.1.9		0.00541859	0	0	0	0	0	0	0	0	0.007347	0	0.0038276
THLA_PEPD6 Acetyl-CoA acetyltransferase OS=Peptoclostridium difficile (strain 630) GN=thlA PE=1 SV=1	[Clostridium] difficile	K00626	2.3.1.9		0	0	0	0	0	0	0.0199173	0.00315507	0	0	0	0
THL_PEPDI Acetyl-CoA acetyltransferase (Fragment) OS=Peptoclostridium difficile GN=thi PE=3 SV=2	[Clostridium] difficile	-	2.3.1.9		0	0	0	0	0	0	0.0199173	0.00315507	0	0	0	0
ERYA2_SACER 6-deoxyerythronolide-B synthase EryA2, modules 3 and 4 OS=Saccharopolyspora erythraea GN=eryA PE=1 SV=3	Saccharopolyspora erythraea	-	2.3.1.94		0	0	0	0	0	0	0	0	0	0	0	0
PLSX_CYAP4 Phosphate acyltransferase OS=Cyanothece sp. (strain PCC 7425 / ATCC 29141) GN=plsX PE=3 SV=1	Cyanothece sp. PCC 7425	K03621	2.3.1.n2		0	0	0	0	0	0	0	0	0	0	0	0
PLSX_NITHX Phosphate acyltransferase OS=Nitrobacter hamburgensis (strain X14 / DSM 10229) GN=plsX PE=3 SV=1	Nitrobacter hamburgensis X14	K03621	2.3.1.n2		0	0	0	0	0	0	0	0	0	0	0	0
PLSX_ACICJ Phosphate acyltransferase OS=Acidiphilium cryptum (strain JF-5) GN=plsX PE=3 SV=1	Acidiphilium cryptum JF-5	K03621	2.3.1.n2		0	0	0	0	0	0	0	0	0	0	0	0
PLSY_SHEWM Glycerol-3-phosphate acyltransferase OS=Shewanella woodyi (strain ATCC 51908 / MS32) GN=plsY PE=3 SV=1	Shewanella woodyi ATCC 51908	K08591	2.3.1.n3		0	0	0	0	0	0	0	0	0	0	0	0
PLSY_ENT38 Glycerol-3-phosphate acyltransferase OS=Enterobacter sp. (strain 638) GN=plsY PE=3 SV=1	Enterobacter sp. 638	K08591	2.3.1.n3		0	0	0.00557877	0	0	0.00473393	0	0	0	0	0.00365631	0
PLSY_CHRSD Glycerol-3-phosphate acyltransferase OS=Chromohalobacter salexigens (strain DSM 3043 / ATCC BAA-138 / NCIMB 13768) GN=plsY PE=3 SV=1	Chromohalobacter salexigens DSM 3043	K08591	2.3.1.n3		0	0	0	0	0	0	0	0	0	0	0	0
GAGT3_ARATH Gamma-glutamyltranspeptidase 3 OS=Arabidopsis thaliana GN=GGT3 PE=2 SV=1	Arabidopsis thaliana	K18592	2.3.2.2 3.4.19.13		0	0	0	0	0	0	0.014938	0.0126203	0.00865239	0	0.00731261	0.00765521
LFTR_BURXL Leucyl/phenylalanyl-tRNA--protein transferase OS=Burkholderia xenovorans (strain LB400) GN=aat PE=3 SV=1	Burkholderia xenovorans LB400	K00684	2.3.2.6		0	0	0	0	0	0	0	0	0	0	0	0
LFTR_NITEU Leucyl/phenylalanyl-tRNA--protein transferase OS=Nitrosomonas europaea (strain ATCC 19718 / NBRC 14298) GN=aat PE=3 SV=1	Nitrosomonas europaea ATCC 19718	K00684	2.3.2.6		0	0	0	0	0	0	0	0	0	0	0	0
LEU1_CATAD 2-isopropylmalate synthase OS=Catenulispora acidiphila (strain DSM 44928 / NRRL B-24433 / NBRC 102108 / JCM 14897) GN=leuA PE=3 SV=1	Catenulispora acidiphila DSM 44928	K01649	2.3.3.13		0	0.00469197	0	0	0	0	0	0	0	0	0	0
LEU1_STRG3 2-isopropylmalate synthase OS=Streptococcus gallolyticus (strain UCN34) GN=leuA PE=3 SV=1	Streptococcus gallolyticus UCN34	K01649	2.3.3.13		0	0	0	0	0	0.00473393	0	0	0	0	0	0
LEU1_BURP1 2-isopropylmalate synthase OS=Burkholderia pseudomallei (strain 1710b) GN=leuA PE=3 SV=1	Burkholderia pseudomallei	K01649	2.3.3.13		0	0	0	0	0	0	0	0	0	0	0	0
LEU1_BLOFL 2-isopropylmalate synthase OS=Blochmannia floridanus GN=leuA PE=3 SV=1	Candidatus Blochmannia floridanus	K01649	2.3.3.13		0	0	0	0	0	0	0	0	0	0	0	0
GL1D1_XENTR Glycosyltransferase 1 domain-containing protein 1 OS=Xenopus tropicalis GN=glt1d1 PE=2 SV=1	Xenopus (Silurana) tropicalis	-	2.4.-.-		0	0	0	0	0	0	0	0	0	0.0036735	0	0
STLP4_ORYSJ Sialyltransferase-like protein 4 OS=Oryza sativa subsp. japonica GN=STLP4 PE=2 SV=1	Oryza sativa Japonica Group	-	2.4.-.-		0	0	0	0	0	0	0	0	0	0.0036735	0	0
OPGH_SHEB5 Glucans biosynthesis glucosyltransferase H OS=Shewanella baltica (strain OS155 / ATCC BAA-1091) GN=opgH PE=3 SV=1	Shewanella baltica OS155	K03669	2.4.1.-		0	0	0	0	0	0	0	0	0	0	0	0.0038276
G1M4V2_AILME Polypeptide N-acetylgalactosaminyltransferase OS=Ailuropoda melanoleuca GN=GALNT9 PE=3 SV=1	Ailuropoda melanoleuca	-	2.4.1.-		0	0	0	0	0	0	0	0	0	0	0	0
ELD1_ARATH Glycosyltransferase-like KOBITO 1 OS=Arabidopsis thaliana GN=ELD1 PE=1 SV=1	Arabidopsis thaliana	-	2.4.1.-		0	0.00469197	0	0	0	0.00473393	0	0	0	0	0	0
UPTG_PHODC Alpha-1,4-glucan-protein synthase [UDP-forming] (Fragments) OS=Phoenix dactylifera PE=1 SV=1	Streptophyta	-	2.4.1.-		0	0	0	0	0	0	0	0	0	0	0	0
UDPE_NPVOP Ecdysteroid UDP-glucosyltransferase OS=Orgyia pseudotsugata multicapsid polyhedrosis virus GN=EGT PE=3 SV=1	Alphabaculovirus	-	2.4.1.-		0	0	0	0	0	0	0.00995867	0	0.0043262	0.0110205	0.00365631	0
PHSL_VICFA Alpha-1,4 glucan phosphorylase L isozyme, chloroplastic/amyloplastic OS=Vicia faba GN=PHO1 PE=2 SV=2	Vicia faba	-	2.4.1.1		0	0	0	0	0	0	0	0	0	0	0	0
CESA1_ORYSJ Probable cellulose synthase A catalytic subunit 1 [UDP-forming] OS=Oryza sativa subsp. japonica GN=CESA1 PE=2 SV=1	Oryza sativa	-	2.4.1.12		0	0	0	0	0	0	0	0	0	0	0	0
SUSY_VICFA Sucrose synthase OS=Vicia faba GN=SUCS PE=2 SV=1	Fabaceae	-	2.4.1.13		0	0.00469197	0.00557877	0	0	0	0	0	0	0	0	0
SUSY_VIGRR Sucrose synthase OS=Vigna radiata var. radiata GN=SS1 PE=1 SV=1	Fabaceae	-	2.4.1.13		0	0.00469197	0	0	0	0	0	0	0	0	0	0
SPSA_SPIOL Sucrose-phosphate synthase OS=Spinacia oleracea GN=SPS1 PE=1 SV=1	Spinacia oleracea	-	2.4.1.14		0	0.00469197	0.0111575	0	0	0	0	0	0	0	0	0
MGAT2_HUMAN Alpha-1,6-mannosyl-glycoprotein 2-beta-N-acetylglucosaminyltransferase OS=Homo sapiens GN=MGAT2 PE=1 SV=1	Homo sapiens	K00736	2.4.1.143		0	0	0	0	0	0	0	0	0	0	0	0.0038276
MGT4A_XENLA Alpha-1,3-mannosyl-glycoprotein 4-beta-N-acetylglucosaminyltransferase A OS=Xenopus laevis GN=mgat4a PE=2 SV=1	Xenopus	K00738	2.4.1.145		0	0	0	0	0	0	0	0	0	0	0	0
UD13_RAT UDP-glucuronosyltransferase 1-3 OS=Rattus norvegicus GN=Ugt1a3 PE=2 SV=1	Rattus norvegicus	-	2.4.1.17		0	0	0	0	0	0	0	0	0	0	0	0
MG: 1,4-alpha-glucan branching enzyme GlgB 1 OS=Clostridium perfringens (strain 13 / Type A) GN=glgB1 PE=3 SV=1 [Q8XPA2] Score: 279.0	Clostridium perfringens str. 13	K00700	2.4.1.18		0	0	0	0	0	0	0	0	0	0	0	0
GLGB_CHESB 1,4-alpha-glucan branching enzyme GlgB OS=Chelativorans sp. (strain BNC1) GN=glgB PE=3 SV=1	Proteobacteria	K00700	2.4.1.18		0	0	0	0	0	0	0	0	0	0.007347	0	0
LPXB_YERPS Lipid-A-disaccharide synthase OS=Yersinia pseudotuberculosis serotype I (strain IP32953) GN=lpxB PE=3 SV=1	Yersinia	K00748	2.4.1.182		0	0	0	0	0	0	0	0	0	0	0	0
MURG_DESRM UDP-N-acetylglucosamine--N-acetylmuramyl-(pentapeptide) pyrophosphoryl-undecaprenol N-acetylglucosamine transferase OS=Desulfotomaculum reducens (strain MI-1) GN=murG PE=3 SV=1	Desulfotomaculum reducens MI-1	K02563	2.4.1.227		0	0	0	0	0	0	0	0	0	0	0	0
MURG_JANSC UDP-N-acetylglucosamine--N-acetylmuramyl-(pentapeptide) pyrophosphoryl-undecaprenol N-acetylglucosamine transferase OS=Jannaschia sp. (strain CCS1) GN=murG PE=3 SV=1	Jannaschia sp. CCS1	K02563	2.4.1.227		0.0270929	0.0422277	0	0.0466242	0.0326432	0.0236696	0	0.00946522	0.00865239	0.014694	0.00365631	0
MSHA_SANKS D-inositol 3-phosphate glycosyltransferase OS=Sanguibacter keddieii (strain ATCC 51767 / DSM 10542 / NCFB 3025 / ST-74) GN=mshA PE=3 SV=1	Sanguibacter keddieii DSM 10542	K15521	2.4.1.250		0	0	0	0	0	0	0	0	0	0	0.00365631	0
MG: N-acetylgalactosamine-N,N'-diacetylbacillosaminyl-diphospho-undecaprenol 4-alpha-N-acetylgalactosaminyltransferase OS=Campylobacter jejuni subsp. jejuni serotype O:2 (strain NCTC 11168) GN=pglJ PE=1 SV=1 [Q0P9C7] Score: 84.0	Campylobacter jejuni subsp. jejuni NCTC 11168 = ATCC 700819	K17248	2.4.1.291		0	0	0	0	0	0	0	0	0	0	0	0
GTFA_AMYOR dTDP-epi-vancosaminyltransferase OS=Amycolatopsis orientalis GN=gtfA PE=1 SV=1	root	K16440	2.4.1.311		0	0	0	0	0	0	0	0	0	0	0	0
GLT10_CAEBR Putative polypeptide N-acetylgalactosaminyltransferase 10 OS=Caenorhabditis briggsae GN=gly-10 PE=3 SV=2	Caenorhabditis briggsae	-	2.4.1.41		0	0	0	0	0.00466331	0	0	0.00315507	0	0	0	0.0038276
MG: Glucosyltransferase-I OS=Streptococcus downei GN=gtfI PE=3 SV=1 [P11001] Score: 176.0	Streptococcus downei	-	2.4.1.5		0	0	0	0	0	0	0	0	0	0	0	0
TREP_THEBR Alpha,alpha-trehalose phosphorylase OS=Thermoanaerobacter brockii GN=treP PE=1 SV=1	Thermoanaerobacter brockii	-	2.4.1.64		0	0	0.00557877	0	0	0	0	0	0	0	0	0
MG: Maltose phosphorylase OS=Bacillus subtilis (strain 168) GN=mdxK PE=3 SV=1 [O06993] Score: 545.0	Bacilli	K00691	2.4.1.8		0	0	0	0	0	0	0	0	0	0	0	0
EMBB_MYCTU Probable arabinosyltransferase B OS=Mycobacterium tuberculosis (strain ATCC 25618 / H37Rv) GN=embB PE=1 SV=1	Mycobacterium tuberculosis H37Rv	K11386	2.4.2.-		0.00541859	0	0	0	0	0	0	0	0	0	0.00365631	0
MTGA_CYTH3 Monofunctional biosynthetic peptidoglycan transglycosylase OS=Cytophaga hutchinsonii (strain ATCC 33406 / NCIMB 9469) GN=mtgA PE=3 SV=1	Cytophaga hutchinsonii ATCC 33406	K03814	2.4.2.-		0.00541859	0	0	0	0	0	0	0	0	0	0	0
ALT_BPT6 NAD--protein ADP-ribosyltransferase OS=Enterobacteria phage T6 GN=alt PE=4 SV=1	Enterobacteria phage T4 sensu lato	-	2.4.2.-		0	0	0	0	0	0	0	0	0	0	0	0
DEOD_SHIBS Purine nucleoside phosphorylase DeoD-type OS=Shigella boydii serotype 4 (strain Sb227) GN=deoD PE=3 SV=1	Enterobacteriaceae	K03784	2.4.2.1		0.0108372	0.0140759	0.0111575	0.0139873	0.00932662	0.00946786	0.00995867	0.00946522	0.0173048	0.007347	0.00365631	0.0114828
PYRE_STRTD Orotate phosphoribosyltransferase OS=Streptococcus thermophilus (strain ATCC BAA-491 / LMD-9) GN=pyrE PE=3 SV=1	Streptococcus	K00762	2.4.2.10		0	0	0	0	0	0	0	0	0	0	0	0
MG: Orotate phosphoribosyltransferase OS=Clostridium acetobutylicum (strain ATCC 824 / DSM 792 / JCM 1419 / LMG 5710 / VKM B-1787) GN=pyrE PE=3 SV=1 [Q97N11] Score: 315.0	Clostridium acetobutylicum ATCC 824	K00762	2.4.2.10		0	0	0	0	0	0	0.00497934	0	0.0043262	0	0	0
HIS1_BIFAA ATP phosphoribosyltransferase OS=Bifidobacterium adolescentis (strain ATCC 15703 / DSM 20083 / NCTC 11814 / E194a) GN=hisG PE=3 SV=1	Bifidobacterium adolescentis ATCC 15703	K00765	2.4.2.17		0	0	0	0	0	0	0	0	0	0	0	0
HIS1_PROM1 ATP phosphoribosyltransferase OS=Prochlorococcus marinus (strain NATL1A) GN=hisG PE=3 SV=1	Prochlorococcus marinus	K00765	2.4.2.17		0	0.00938394	0.00557877	0.00466242	0.0139899	0.00473393	0.00497934	0	0.0043262	0.0036735	0.00365631	0
HIS1_BACC7 ATP phosphoribosyltransferase OS=Bacillus cereus (strain AH187) GN=hisG PE=3 SV=1	Bacillus cereus	K00765	2.4.2.17		0	0	0	0	0	0	0	0	0	0	0	0
TRPD_DEHM1 Anthranilate phosphoribosyltransferase OS=Dehalococcoides mccartyi (strain ATCC BAA-2266 / KCTC 15142 / 195) GN=trpD PE=3 SV=1	Dehalococcoides mccartyi	K00766	2.4.2.18		0	0	0	0	0	0	0	0	0	0	0	0
TRPD_THEP3 Anthranilate phosphoribosyltransferase OS=Thermoanaerobacter pseudethanolicus (strain ATCC 33223 / 39E) GN=trpD PE=3 SV=1	Thermoanaerobacter	K00766	2.4.2.18		0	0	0	0	0.00466331	0	0	0	0	0	0	0
TRPD_DESOH Anthranilate phosphoribosyltransferase OS=Desulfococcus oleovorans (strain DSM 6200 / Hxd3) GN=trpD PE=3 SV=1	Desulfococcus oleovorans Hxd3	K00766	2.4.2.18		0	0	0	0.00466242	0.00466331	0	0	0	0	0	0	0
NADC_ORYSJ Nicotinate-nucleotide pyrophosphorylase [carboxylating], chloroplastic OS=Oryza sativa subsp. japonica GN=Os09g0553600 PE=2 SV=1	Oryza sativa Japonica Group	K00767	2.4.2.19		0	0.00469197	0	0	0	0	0	0	0	0	0	0
COBT_MYCA1 Nicotinate-nucleotide--dimethylbenzimidazole phosphoribosyltransferase OS=Mycobacterium avium (strain 104) GN=cobT PE=3 SV=1	Mycobacterium avium	K00768	2.4.2.21		0	0	0	0	0	0	0	0	0	0	0	0
COBT_ROSS1 Nicotinate-nucleotide--dimethylbenzimidazole phosphoribosyltransferase OS=Roseiflexus sp. (strain RS-1) GN=cobT PE=3 SV=1	Roseiflexus sp. RS-1	K00768	2.4.2.21		0	0	0	0	0	0	0	0	0	0	0	0
COBT_SHELP Nicotinate-nucleotide--dimethylbenzimidazole phosphoribosyltransferase OS=Shewanella loihica (strain ATCC BAA-1088 / PV-4) GN=cobT PE=3 SV=1	Shewanella loihica PV-4	K00768	2.4.2.21		0	0	0	0	0	0	0	0	0	0	0	0.0038276
XPT_STRZP Xanthine phosphoribosyltransferase OS=Streptococcus pneumoniae (strain P1031) GN=xpt PE=3 SV=1	Firmicutes	K03816	2.4.2.22		0	0	0	0	0	0	0	0	0	0	0	0
XGPT_EDWI9 Xanthine phosphoribosyltransferase OS=Edwardsiella ictaluri (strain 93-146) GN=gpt PE=3 SV=1	Enterobacteriaceae	K00769	2.4.2.22		0	0	0	0	0.00466331	0	0	0	0	0	0	0
XGPT_ERWT9 Xanthine phosphoribosyltransferase OS=Erwinia tasmaniensis (strain DSM 17950 / CIP 109463 / Et1/99) GN=gpt PE=3 SV=1	Enterobacteriaceae	K00769	2.4.2.22		0	0	0	0	0.00466331	0	0	0	0	0	0	0
XGPT_SALPB Xanthine phosphoribosyltransferase OS=Salmonella paratyphi B (strain ATCC BAA-1250 / SPB7) GN=gpt PE=3 SV=1	Enterobacteriaceae	K00769	2.4.2.22		0	0	0	0	0.00466331	0	0	0	0	0	0	0
XGPT_VIBVY Xanthine phosphoribosyltransferase OS=Vibrio vulnificus (strain YJ016) GN=gpt PE=3 SV=1	Vibrio	K00769	2.4.2.22		0	0	0	0	0	0	0	0	0	0	0	0
TGT_PELTS Queuine tRNA-ribosyltransferase OS=Pelotomaculum thermopropionicum (strain DSM 13744 / JCM 10971 / SI) GN=tgt PE=3 SV=1	Pelotomaculum thermopropionicum SI	K00773	2.4.2.29		0	0	0.00557877	0	0	0	0	0	0	0	0	0
MG: Queuine tRNA-ribosyltransferase OS=Nitratiruptor sp. (strain SB155-2) GN=tgt PE=3 SV=1 [A6Q3Y5] Score: 535.0	Epsilonproteobacteria	K00773	2.4.2.29		0	0	0	0	0	0	0	0	0	0	0	0
QTRD1_CHICK Queuine tRNA-ribosyltransferase subunit QTRTD1 OS=Gallus gallus GN=QTRTD1 PE=2 SV=1	Gallus gallus	K15407	2.4.2.29		0	0	0	0	0.00466331	0	0	0	0	0	0	0
TGT_RAT Queuine tRNA-ribosyltransferase OS=Rattus norvegicus GN=Qtrt1 PE=2 SV=1	Muridae	K00773	2.4.2.29		0	0	0	0	0	0	0	0	0	0	0	0
UDP_SALTY Uridine phosphorylase OS=Salmonella typhimurium (strain LT2 / SGSC1412 / ATCC 700720) GN=udp PE=1 SV=2	Enterobacteriaceae	K00757	2.4.2.3		0.00541859	0.00938394	0.0111575	0.0139873	0.00466331	0.00946786	0.029876	0.0220855	0.0302834	0.007347	0.0109689	0
UDP_HAEIN Uridine phosphorylase OS=Haemophilus influenzae (strain ATCC 51907 / DSM 11121 / KW20 / Rd) GN=udp PE=3 SV=2	Gammaproteobacteria	K00757	2.4.2.3		0	0	0	0	0	0	0	0	0.0043262	0	0	0
PARP4_HUMAN Poly [ADP-ribose] polymerase 4 OS=Homo sapiens GN=PARP4 PE=1 SV=3	Homo sapiens	K10798	2.4.2.30		0	0	0	0	0	0	0	0	0	0	0	0
PAR14_MOUSE Poly [ADP-ribose] polymerase 14 OS=Mus musculus GN=Parp14 PE=1 SV=3	Mus musculus	K15261	2.4.2.30		0	0	0	0	0	0.00473393	0	0	0	0	0	0
NAR1_HUMAN GPI-linked NAD(P)(+)--arginine ADP-ribosyltransferase 1 OS=Homo sapiens GN=ART1 PE=2 SV=2	Homo sapiens	K06716	2.4.2.31		0	0	0	0	0	0	0	0	0	0	0	0
TYPH_SHIF8 Thymidine phosphorylase OS=Shigella flexneri serotype 5b (strain 8401) GN=deoA PE=3 SV=1	Enterobacteriaceae	K00758	2.4.2.4		0.00541859	0.00469197	0	0	0	0	0.014938	0.0283956	0.0173048	0.0036735	0.00731261	0.00765521
CITG_CITK8 Probable 2-(5-triphosphoribosyl)-3-dephosphocoenzyme-A synthase OS=Citrobacter koseri (strain ATCC BAA-895 / CDC 4225-83 / SGSC4696) GN=citG PE=3 SV=1	Citrobacter koseri ATCC BAA-895	K05966	2.4.2.52		0	0	0	0	0	0	0	0	0	0	0	0
APT_STRP4 Adenine phosphoribosyltransferase OS=Streptococcus pneumoniae serotype 19F (strain G54) GN=apt PE=3 SV=1	Streptococcus	K00759	2.4.2.7		0	0	0	0	0	0	0	0	0	0	0	0
APT_STRSY Adenine phosphoribosyltransferase OS=Streptococcus suis (strain 05ZYH33) GN=apt PE=3 SV=1	Streptococcus	K00759	2.4.2.7		0	0	0	0	0	0	0.00497934	0.00631014	0.0043262	0	0	0
APT_STREM Adenine phosphoribosyltransferase OS=Streptococcus equi subsp. zooepidemicus (strain MGCS10565) GN=apt PE=3 SV=1	Lactobacillales	K00759	2.4.2.7		0	0	0	0	0	0	0.00497934	0.00315507	0.0043262	0.0036735	0.00365631	0
APT_CLOB8 Adenine phosphoribosyltransferase OS=Clostridium beijerinckii (strain ATCC 51743 / NCIMB 8052) GN=apt PE=3 SV=1	Clostridium beijerinckii NCIMB 8052	K00759	2.4.2.7		0	0	0	0	0	0	0	0	0	0	0	0
APT_METNO Adenine phosphoribosyltransferase OS=Methylobacterium nodulans (strain ORS2060 / LMG 21967) GN=apt PE=3 SV=1	Methylobacterium nodulans ORS 2060	K00759	2.4.2.7		0	0	0	0	0	0	0	0.00315507	0	0	0	0
APT_RHIGA Adenine phosphoribosyltransferase OS=Rhizobium galegae GN=apt PE=3 SV=2	Rhizobium galegae	-	2.4.2.7		0	0	0	0	0	0	0	0	0.0043262	0	0	0
APT_ERWT9 Adenine phosphoribosyltransferase OS=Erwinia tasmaniensis (strain DSM 17950 / CIP 109463 / Et1/99) GN=apt PE=3 SV=1	Enterobacteriaceae	K00759	2.4.2.7		0	0	0	0	0	0	0.00497934	0.00631014	0.0043262	0	0	0
APT3_ARATH Adenine phosphoribosyltransferase 3 OS=Arabidopsis thaliana GN=APT3 PE=1 SV=1	Arabidopsis thaliana	K00759	2.4.2.7		0	0	0	0	0	0	0	0	0	0	0	0
APT1_WHEAT Adenine phosphoribosyltransferase 1 OS=Triticum aestivum GN=APT1 PE=2 SV=1	Streptophyta	K00759	2.4.2.7		0	0	0	0	0	0	0	0	0	0	0	0
APT2_ARATH Adenine phosphoribosyltransferase 2 OS=Arabidopsis thaliana GN=APT2 PE=1 SV=1	Streptophyta	K00759	2.4.2.7		0	0	0	0	0	0	0	0	0	0	0	0
HPRT_LACLA Hypoxanthine-guanine phosphoribosyltransferase OS=Lactococcus lactis subsp. lactis (strain IL1403) GN=hpt PE=3 SV=1	Lactococcus lactis subsp. lactis Il1403	K00760	2.4.2.8		0	0	0	0	0	0	0	0	0	0	0	0
HPRT_STRP6 Hypoxanthine-guanine phosphoribosyltransferase OS=Streptococcus pyogenes serotype M6 (strain ATCC BAA-946 / MGAS10394) GN=hpt PE=1 SV=1	Streptococcus	K00760	2.4.2.8		0	0	0	0	0	0	0	0	0	0	0	0
HPRT_STRT2 Hypoxanthine-guanine phosphoribosyltransferase OS=Streptococcus thermophilus (strain ATCC BAA-250 / LMG 18311) GN=hpt PE=3 SV=1	Streptococcus	K00760	2.4.2.8		0	0	0	0	0	0	0	0	0	0	0	0
PYRR_STRPB Bifunctional protein PyrR OS=Streptococcus pyogenes serotype M12 (strain MGAS2096) GN=pyrR PE=3 SV=1	Streptococcus pyogenes	K02825	2.4.2.9		0	0	0	0	0	0	0	0	0	0	0	0
PYRR_LACBA Bifunctional protein PyrR OS=Lactobacillus brevis (strain ATCC 367 / JCM 1170) GN=pyrR PE=3 SV=1	Lactobacillales	K02825	2.4.2.9		0	0	0	0	0	0	0	0	0	0	0	0
MG: Bifunctional protein PyrR OS=Leuconostoc citreum (strain KM20) GN=pyrR PE=3 SV=1 [B1MZJ0] Score: 345.0	Lactobacillales	K02825	2.4.2.9		0	0	0	0	0	0	0	0	0	0	0	0
PYRR_STRA3 Bifunctional protein PyrR OS=Streptococcus agalactiae serotype III (strain NEM316) GN=pyrR PE=3 SV=1	Lactobacillales	K02825	2.4.2.9		0	0	0	0	0	0	0	0	0	0	0	0
PYRR_STRZT Bifunctional protein PyrR OS=Streptococcus pneumoniae (strain Taiwan19F-14) GN=pyrR PE=3 SV=1	Lactobacillales	K02825	2.4.2.9		0	0	0	0	0	0	0	0	0	0	0	0
PYRR_PEDPA Bifunctional protein PyrR OS=Pediococcus pentosaceus (strain ATCC 25745 / 183-1w) GN=pyrR PE=3 SV=1	Lactobacillales	K02825	2.4.2.9		0	0	0	0	0	0	0	0	0	0	0	0
UPP_HAEIG Uracil phosphoribosyltransferase OS=Haemophilus influenzae (strain PittGG) GN=upp PE=3 SV=1	Pasteurellaceae	K00761	2.4.2.9		0	0.00469197	0	0.00932484	0.00466331	0.00473393	0	0	0	0	0	0
PYRR_PSEAB Bifunctional protein PyrR OS=Pseudomonas aeruginosa (strain UCBPP-PA14) GN=pyrR PE=3 SV=1	Pseudomonas aeruginosa	K02825	2.4.2.9		0	0	0	0	0	0	0	0	0	0	0	0
UPP_FRATW Uracil phosphoribosyltransferase OS=Francisella tularensis subsp. tularensis (strain WY96-3418) GN=upp PE=3 SV=1	Gammaproteobacteria	K00761	2.4.2.9		0	0.00469197	0	0.00932484	0.00466331	0.00473393	0	0	0.00865239	0	0	0
UPP_KLEP7 Uracil phosphoribosyltransferase OS=Klebsiella pneumoniae subsp. pneumoniae (strain ATCC 700721 / MGH 78578) GN=upp PE=3 SV=1	Gammaproteobacteria	K00761	2.4.2.9		0	0.00469197	0	0.00932484	0.00466331	0.00473393	0	0	0	0	0	0
UPP_STRR6 Uracil phosphoribosyltransferase OS=Streptococcus pneumoniae (strain ATCC BAA-255 / R6) GN=upp PE=3 SV=2	Bacteria	K00761	2.4.2.9		0	0	0	0	0	0	0	0	0	0	0	0
UPP_LACSS Uracil phosphoribosyltransferase OS=Lactobacillus sakei subsp. sakei (strain 23K) GN=upp PE=3 SV=1	Bacteria	K00761	2.4.2.9		0	0.00469197	0	0.00932484	0.00466331	0.00473393	0	0	0	0	0	0.0038276
UPP_STRT2 Uracil phosphoribosyltransferase OS=Streptococcus thermophilus (strain ATCC BAA-250 / LMG 18311) GN=upp PE=3 SV=1	Bacteria	K00761	2.4.2.9		0	0	0	0	0	0	0	0	0	0	0.00365631	0
UPP_STRU0 Uracil phosphoribosyltransferase OS=Streptococcus uberis (strain ATCC BAA-854 / 0140J) GN=upp PE=3 SV=1	Bacteria	K00761	2.4.2.9		0.00541859	0	0	0	0	0	0	0	0	0	0.00365631	0.0038276
LGT_METSB Prolipoprotein diacylglyceryl transferase OS=Methylocella silvestris (strain BL2 / DSM 15510 / NCIMB 13906) GN=lgt PE=3 SV=1	Methylocella silvestris BL2	K13292	2.4.99.-		0	0	0	0	0	0	0	0	0	0	0	0
LGT_ENT38 Prolipoprotein diacylglyceryl transferase OS=Enterobacter sp. (strain 638) GN=lgt PE=3 SV=1	Enterobacter sp. 638	K13292	2.4.99.-		0	0	0	0	0	0	0	0	0	0	0	0
LGT_THICR Prolipoprotein diacylglyceryl transferase OS=Thiomicrospira crunogena (strain XCL-2) GN=lgt PE=3 SV=1	Thiomicrospira crunogena XCL-2	K13292	2.4.99.-		0	0	0	0	0	0	0	0	0	0	0	0
QUEA_BRUC2 S-adenosylmethionine:tRNA ribosyltransferase-isomerase OS=Brucella canis (strain ATCC 23365 / NCTC 10854) GN=queA PE=3 SV=1	Brucella canis ATCC 23365	K07568	2.4.99.17		0	0	0	0	0	0	0	0	0	0	0	0
QUEA_RALPJ S-adenosylmethionine:tRNA ribosyltransferase-isomerase OS=Ralstonia pickettii (strain 12J) GN=queA PE=3 SV=1	Ralstonia pickettii 12J	K07568	2.4.99.17		0.00541859	0	0.00557877	0	0	0	0	0	0	0.0036735	0	0
GSBP_CHICK Dolichyl-diphosphooligosaccharide--protein glycotransferase OS=Gallus gallus PE=2 SV=2	Gallus gallus	K09580	2.4.99.18		0	0.00469197	0	0	0	0	0	0	0	0	0	0
AGLB_HALVD Dolichyl-monophosphooligosaccharide--protein glycotransferase AglB OS=Haloferax volcanii (strain ATCC 29605 / DSM 3757 / JCM 8879 / NBRC 14742 / NCIMB 2012 / VKM B-1768 / DS2) GN=aglB PE=1 SV=1	Haloferax volcanii DS2	K07151	2.4.99.21		0	0	0	0	0	0	0	0	0	0	0	0
ISPT_BRUSU Isoprenyl transferase OS=Brucella suis biovar 1 (strain 1330) GN=uppS PE=3 SV=1	Brucella	K00806	2.5.1.-		0	0	0	0	0	0	0	0	0	0	0	0
FTMB_ASPFM Tryprostatin B synthase OS=Neosartorya fumigata GN=ftmPT1 PE=3 SV=1	Aspergillus fumigatus	K14132	2.5.1.106		0.00541859	0.00469197	0	0	0.00466331	0	0	0	0	0	0	0
G1L6G2_AILME Glutathione S-transferase OS=Ailuropoda melanoleuca GN=LOC100471068 PE=3 SV=1	Ailuropoda melanoleuca	-	2.5.1.18		0	0	0	0	0	0	0	0	0	0	0	0
GSTF1_MAIZE Glutathione S-transferase 1 OS=Zea mays GN=GST1 PE=1 SV=4	Poaceae	K00799	2.5.1.18		0	0	0	0	0	0	0	0	0	0	0	0
GSTF4_MAIZE Glutathione S-transferase 4 OS=Zea mays GN=GST4 PE=1 SV=2	Poaceae	K00799	2.5.1.18		0	0	0	0	0	0	0	0	0	0	0	0
GSTF4_ARATH Glutathione S-transferase F4 OS=Arabidopsis thaliana GN=GSTF4 PE=2 SV=1	Arabidopsis thaliana	K00799	2.5.1.18		0	0	0	0	0	0	0	0	0	0	0	0
AROA_CHLPB 3-phosphoshikimate 1-carboxyvinyltransferase OS=Chlorobium phaeobacteroides (strain BS1) GN=aroA PE=3 SV=1	Chlorobium phaeobacteroides BS1	K00800	2.5.1.19		0	0	0	0	0	0	0	0.00315507	0	0.0036735	0	0
AROA_STAA3 3-phosphoshikimate 1-carboxyvinyltransferase OS=Staphylococcus aureus (strain USA300) GN=aroA PE=3 SV=1	Staphylococcus aureus subsp. aureus USA300	K00800	2.5.1.19		0	0	0	0	0	0	0	0	0	0.0036735	0	0
AROA_STRSV 3-phosphoshikimate 1-carboxyvinyltransferase OS=Streptococcus sanguinis (strain SK36) GN=aroA PE=3 SV=1	Streptococcus sanguinis SK36	K00800	2.5.1.19		0	0	0	0	0	0	0.00497934	0	0	0	0	0
AROA_RHOP5 3-phosphoshikimate 1-carboxyvinyltransferase OS=Rhodopseudomonas palustris (strain BisA53) GN=aroA PE=3 SV=1	Rhodopseudomonas palustris BisA53	K00800	2.5.1.19		0	0	0	0	0	0	0	0	0	0	0	0
AROA_AERPE 3-phosphoshikimate 1-carboxyvinyltransferase OS=Aeropyrum pernix (strain ATCC 700893 / DSM 11879 / JCM 9820 / NBRC 100138 / K1) GN=aroA PE=3 SV=1	root	K00800	2.5.1.19		0	0	0	0	0	0	0	0	0	0.0036735	0.00365631	0
THIE_LISIN Thiamine-phosphate synthase OS=Listeria innocua serovar 6a (strain CLIP 11262) GN=thiE PE=3 SV=1	Listeria	K00788	2.5.1.3		0	0	0	0	0	0	0	0	0	0	0	0
CYSK_BACSU Cysteine synthase OS=Bacillus subtilis (strain 168) GN=cysK PE=1 SV=3	Bacillus subtilis subsp. subtilis str. 168	K01738	2.5.1.47		0	0	0	0	0	0	0	0	0	0	0	0
CYSK1_ORYSJ Cysteine synthase OS=Oryza sativa subsp. japonica GN=RCS1 PE=2 SV=2	Oryza sativa Japonica Group	K01738	2.5.1.47		0	0	0	0	0	0	0	0	0	0	0	0
CYSK_ECOLI Cysteine synthase A OS=Escherichia coli (strain K12) GN=cysK PE=1 SV=2	Enterobacteriaceae	K01738	2.5.1.47 4.5.1.5		0	0.00469197	0	0	0	0.00473393	0.0697107	0.0504811	0.043262	0.007347	0.00731261	0.0038276
METB_MYCTU Cystathionine gamma-synthase OS=Mycobacterium tuberculosis (strain ATCC 25618 / H37Rv) GN=metB PE=1 SV=1	Mycobacterium	K01739	2.5.1.48		0	0	0	0	0	0	0	0	0	0.0036735	0	0
AROG_MYCTU Phospho-2-dehydro-3-deoxyheptonate aldolase AroG OS=Mycobacterium tuberculosis (strain ATCC 25618 / H37Rv) GN=aroG PE=1 SV=1	Mycobacterium tuberculosis H37Rv	K01626	2.5.1.54		0	0	0	0	0	0	0	0	0	0	0	0
MG: Phospho-2-dehydro-3-deoxyheptonate aldolase OS=Thermotoga maritima (strain ATCC 43589 / MSB8 / DSM 3109 / JCM 10099) GN=aroF PE=1 SV=1 [Q9WYH8] Score: 337.0	Thermotoga maritima MSB8	K03856	2.5.1.54		0.00541859	0.00469197	0.00557877	0	0	0	0	0	0	0	0	0.0038276
KDSA_ACIF5 2-dehydro-3-deoxyphosphooctonate aldolase OS=Acidithiobacillus ferrooxidans (strain ATCC 53993) GN=kdsA PE=3 SV=1	Acidithiobacillus ferrooxidans	K01627	2.5.1.55		0	0	0	0	0	0	0	0.00315507	0	0	0	0
KDSA_ECO7I 2-dehydro-3-deoxyphosphooctonate aldolase OS=Escherichia coli O7:K1 (strain IAI39 / ExPEC) GN=kdsA PE=3 SV=1	Escherichia	K01627	2.5.1.55		0	0	0	0.00466242	0	0	0.0199173	0.0126203	0.021631	0.007347	0.0109689	0.00765521
METK_THEVO S-adenosylmethionine synthase OS=Thermoplasma volcanium (strain ATCC 51530 / DSM 4299 / JCM 9571 / NBRC 15438 / GSS1) GN=mat PE=3 SV=1	Thermoplasma volcanium GSS1	K00789	2.5.1.6		0	0	0	0	0	0	0	0	0	0	0	0
METK_STRA5 S-adenosylmethionine synthase OS=Streptococcus agalactiae serotype V (strain ATCC BAA-611 / 2603 V/R) GN=metK PE=3 SV=1	Streptococcus agalactiae	K00789	2.5.1.6		0	0	0	0	0	0	0.00497934	0.00315507	0.0043262	0.007347	0.00731261	0
METK_ENTFA S-adenosylmethionine synthase OS=Enterococcus faecalis (strain ATCC 700802 / V583) GN=metK PE=3 SV=1	Bacteria	K00789	2.5.1.6		0	0	0	0	0	0	0	0	0	0	0	0
METK_PROM5 S-adenosylmethionine synthase OS=Prochlorococcus marinus (strain MIT 9515) GN=metK PE=3 SV=1	Bacteria	K00789	2.5.1.6		0	0	0	0	0	0	0	0	0	0.0036735	0	0
METK_GLOVI S-adenosylmethionine synthase OS=Gloeobacter violaceus (strain PCC 7421) GN=metK PE=3 SV=1	Bacteria	K00789	2.5.1.6		0	0	0	0	0	0	0	0	0	0	0	0
METK_GEOTN S-adenosylmethionine synthase OS=Geobacillus thermodenitrificans (strain NG80-2) GN=metK PE=3 SV=1	Bacteria	K00789	2.5.1.6		0	0	0	0	0	0	0	0	0	0	0	0
METK_PYRAE S-adenosylmethionine synthase OS=Pyrobaculum aerophilum (strain ATCC 51768 / IM2 / DSM 7523 / JCM 9630 / NBRC 100827) GN=mat PE=3 SV=1	root	K00789	2.5.1.6		0	0	0	0	0	0	0	0	0	0	0.00365631	0
HEM3_CAMHC Porphobilinogen deaminase OS=Campylobacter hominis (strain ATCC BAA-381 / LMG 19568 / NCTC 13146 / CH001A) GN=hemC PE=3 SV=1	Campylobacter hominis ATCC BAA-381	K01749	2.5.1.61		0	0	0	0	0	0	0	0	0	0	0	0
MURA2_BACSK UDP-N-acetylglucosamine 1-carboxyvinyltransferase 2 OS=Bacillus clausii (strain KSM-K16) GN=murA2 PE=3 SV=1	Bacillus clausii KSM-K16	K00790	2.5.1.7		0	0	0	0	0	0	0	0	0	0	0	0
MURA2_STAAR UDP-N-acetylglucosamine 1-carboxyvinyltransferase 2 OS=Staphylococcus aureus (strain MRSA252) GN=murA2 PE=3 SV=1	Staphylococcus aureus	-	2.5.1.7		0	0	0	0	0	0	0	0	0	0	0	0
MG: UDP-N-acetylglucosamine 1-carboxyvinyltransferase 1 OS=Clostridium acetobutylicum (strain ATCC 824 / DSM 792 / JCM 1419 / LMG 5710 / VKM B-1787) GN=murA1 PE=3 SV=1 [Q97F79] Score: 532.0	Clostridium	K00790	2.5.1.7		0	0	0	0	0	0	0.0248967	0.0189304	0.021631	0.014694	0.0109689	0.038276
MURA_YERPY UDP-N-acetylglucosamine 1-carboxyvinyltransferase OS=Yersinia pseudotuberculosis serotype O:3 (strain YPIII) GN=murA PE=3 SV=1	Gammaproteobacteria	K00790	2.5.1.7		0	0	0	0	0	0	0.0199173	0.0157754	0.0129786	0.014694	0.0109689	0.0344484
MURA_TREDE UDP-N-acetylglucosamine 1-carboxyvinyltransferase OS=Treponema denticola (strain ATCC 35405 / CIP 103919 / DSM 14222) GN=murA PE=3 SV=1	Treponema denticola ATCC 35405	K00790	2.5.1.7		0	0	0	0	0	0	0	0	0	0	0	0
NADA_CLONN Quinolinate synthase A OS=Clostridium novyi (strain NT) GN=nadA PE=3 SV=1	Clostridium novyi NT	K03517	2.5.1.72		0	0	0	0	0.00466331	0	0	0	0	0	0	0
MIAA_NITHX tRNA dimethylallyltransferase OS=Nitrobacter hamburgensis (strain X14 / DSM 10229) GN=miaA PE=3 SV=1	Nitrobacter hamburgensis X14	K00791	2.5.1.75		0	0	0	0	0	0	0	0	0	0	0	0
MIAA_BURCA tRNA dimethylallyltransferase OS=Burkholderia cenocepacia (strain AU 1054) GN=miaA PE=3 SV=1	Burkholderia cenocepacia AU 1054	K00791	2.5.1.75		0	0	0	0	0	0	0	0	0	0.0036735	0	0
MIAA_SHEWM tRNA dimethylallyltransferase OS=Shewanella woodyi (strain ATCC 51908 / MS32) GN=miaA PE=3 SV=1	Shewanella woodyi ATCC 51908	K00791	2.5.1.75		0	0	0	0	0	0	0	0	0	0	0	0.0038276
MIAA_THESQ tRNA dimethylallyltransferase OS=Thermotoga sp. (strain RQ2) GN=miaA PE=3 SV=1	Thermotoga sp. RQ2	K00791	2.5.1.75		0	0	0	0	0	0	0	0	0	0	0	0
RISB_CROS8 6,7-dimethyl-8-ribityllumazine synthase OS=Cronobacter sakazakii (strain ATCC BAA-894) GN=ribH PE=3 SV=1	Enterobacteriaceae	K00794	2.5.1.78		0.0216743	0.0328438	0	0.0279745	0.0326432	0.0189357	0.0199173	0.0126203	0.0346096	0.007347	0.0182815	0.0038276
RISB_YERE8 6,7-dimethyl-8-ribityllumazine synthase OS=Yersinia enterocolitica serotype O:8 / biotype 1B (strain NCTC 13174 / 8081) GN=ribH PE=3 SV=1	Enterobacteriaceae	K00794	2.5.1.78		0.0216743	0.0328438	0	0.0139873	0.0373065	0.0189357	0.00497934	0.00631014	0.0259572	0.0036735	0.0182815	0.0038276
RISA_SHIFL Riboflavin synthase OS=Shigella flexneri GN=ribE PE=3 SV=1	Enterobacteriaceae	K00793	2.5.1.9		0	0	0	0	0	0	0	0	0	0	0	0
MG: Putative N-acetyl-LL-diaminopimelate aminotransferase OS=Bacillus subtilis (strain 168) GN=patA PE=1 SV=3 [P16524] Score: 316.0	Bacillus subtilis subsp. subtilis str. 168	K00841	2.6.1.-		0	0	0	0	0	0	0	0	0	0	0	0
AAT_SALTY Aspartate aminotransferase OS=Salmonella typhimurium (strain LT2 / SGSC1412 / ATCC 700720) GN=aspC PE=3 SV=1	Enterobacteriaceae	K00813	2.6.1.1		0	0	0	0	0	0	0.0547727	0.0504811	0.0562405	0.007347	0.0219378	0.0153104
AATC_ORYSJ Aspartate aminotransferase, cytoplasmic OS=Oryza sativa subsp. japonica GN=Os01g0760600 PE=2 SV=1	Streptophyta	K14454	2.6.1.1		0	0	0	0	0	0	0	0	0	0	0	0
AATC_DAUCA Aspartate aminotransferase, cytoplasmic OS=Daucus carota PE=2 SV=1	Streptophyta	-	2.6.1.1		0	0	0	0	0	0	0	0	0	0	0	0
ARGD_XANCP Acetylornithine aminotransferase OS=Xanthomonas campestris pv. campestris (strain ATCC 33913 / DSM 3586 / NCPPB 528 / LMG 568 / P 25) GN=argD PE=3 SV=1	Xanthomonas campestris pv. campestris str. ATCC 33913	K00821	2.6.1.11		0	0	0	0.00932484	0	0.00473393	0	0	0	0	0	0
GLMS_BACLD Glutamine--fructose-6-phosphate aminotransferase [isomerizing] OS=Bacillus licheniformis (strain ATCC 14580 / DSM 13 / JCM 2505 / NBRC 12200 / NCIMB 9375 / NRRL NRS-1264 / Gibson 46) GN=glmS PE=3 SV=3	Bacillus licheniformis DSM 13 = ATCC 14580	K00820	2.6.1.16		0	0	0	0	0	0	0	0	0	0	0	0
GLMS_SHIFL Glutamine--fructose-6-phosphate aminotransferase [isomerizing] OS=Shigella flexneri GN=glmS PE=3 SV=3	Enterobacteriaceae	K00820	2.6.1.16		0.0108372	0.00938394	0.00557877	0	0	0.00473393	0.00995867	0.0189304	0.00865239	0	0	0
MG: Glutamine--fructose-6-phosphate aminotransferase [isomerizing] OS=Corynebacterium diphtheriae (strain ATCC 700971 / NCTC 13129 / Biotype gravis) GN=glmS PE=3 SV=3 [Q6NG33] Score: 570.0	Bacteria	K00820	2.6.1.16		0	0	0	0	0	0	0.00497934	0.00631014	0.00865239	0.0036735	0.00365631	0
GLMS_CALS4 Glutamine--fructose-6-phosphate aminotransferase [isomerizing] OS=Caldanaerobacter subterraneus subsp. tengcongensis (strain DSM 15242 / JCM 11007 / NBRC 100824 / MB4) GN=glmS PE=3 SV=3	Bacteria	K00820	2.6.1.16		0	0	0	0	0	0	0.00497934	0.00631014	0.00865239	0.0036735	0	0
GLMS_GEOSL Glutamine--fructose-6-phosphate aminotransferase [isomerizing] OS=Geobacter sulfurreducens (strain ATCC 51573 / DSM 12127 / PCA) GN=glmS PE=3 SV=3	Bacteria	K00820	2.6.1.16		0	0	0	0	0	0	0	0	0	0	0	0
SGAT_MAIZE Serine--glyoxylate aminotransferase (Fragments) OS=Zea mays PE=1 SV=1	Streptophyta	-	2.6.1.45 2.6.1.44		0	0	0	0	0	0	0	0	0	0	0	0
SGAT_ARATH Serine--glyoxylate aminotransferase OS=Arabidopsis thaliana GN=AGT1 PE=1 SV=2	Streptophyta	K00830	2.6.1.45 2.6.1.44 2.6.1.- 2.6.1.51		0	0	0	0	0	0	0	0	0	0	0	0
SERC_EXISA Phosphoserine aminotransferase OS=Exiguobacterium sp. (strain ATCC BAA-1283 / AT1b) GN=serC PE=3 SV=1	Exiguobacterium sp. AT1b	K00831	2.6.1.52		0	0	0	0	0	0	0	0	0	0	0	0
SERC_STRMU Phosphoserine aminotransferase OS=Streptococcus mutans serotype c (strain ATCC 700610 / UA159) GN=serC PE=3 SV=1	Streptococcus	K00831	2.6.1.52		0	0	0	0	0	0	0	0	0	0	0	0
SERC_STRSV Phosphoserine aminotransferase OS=Streptococcus sanguinis (strain SK36) GN=serC PE=3 SV=1	Streptococcus	K00831	2.6.1.52		0	0	0	0	0	0	0	0	0	0	0	0
SERC_STRTD Phosphoserine aminotransferase OS=Streptococcus thermophilus (strain ATCC BAA-491 / LMD-9) GN=serC PE=3 SV=1	Streptococcus	K00831	2.6.1.52		0	0	0	0	0	0	0	0	0	0	0	0
SERC_DESPS Phosphoserine aminotransferase OS=Desulfotalea psychrophila (strain LSv54 / DSM 12343) GN=serC PE=3 SV=1	Desulfotalea psychrophila LSv54	K00831	2.6.1.52		0	0	0	0	0	0	0	0	0	0	0	0
SERC_ECO5E Phosphoserine aminotransferase OS=Escherichia coli O157:H7 (strain EC4115 / EHEC) GN=serC PE=3 SV=1	Enterobacteriaceae	K00831	2.6.1.52		0	0	0	0	0	0	0	0	0	0	0	0
DAPAT_METTH LL-diaminopimelate aminotransferase OS=Methanothermobacter thermautotrophicus (strain ATCC 29096 / DSM 1053 / JCM 10044 / NBRC 100330 / Delta H) GN=dapL PE=1 SV=1	Methanothermobacter thermautotrophicus str. Delta H	K10206	2.6.1.83		0	0	0	0	0	0	0	0	0.0043262	0	0	0
PABA_BACSU Aminodeoxychorismate/anthranilate synthase component 2 OS=Bacillus subtilis (strain 168) GN=pabA PE=2 SV=1	Bacillus subtilis subsp. subtilis str. 168	K01664	2.6.1.85 4.1.3.27		0	0	0	0	0	0	0	0	0	0	0	0
HIS8_LISMO Histidinol-phosphate aminotransferase OS=Listeria monocytogenes serovar 1/2a (strain ATCC BAA-679 / EGD-e) GN=hisC PE=3 SV=1	Listeria monocytogenes EGD-e	K00817	2.6.1.9		0	0	0	0	0	0	0	0	0	0	0	0
MG: Histidinol-phosphate aminotransferase OS=Clostridium novyi (strain NT) GN=hisC PE=3 SV=1 [A0PXP5] Score: 183.0	Clostridium novyi NT	K00817	2.6.1.9		0	0	0	0	0	0	0	0	0	0	0	0
HIS8_CALS8 Histidinol-phosphate aminotransferase OS=Caldicellulosiruptor saccharolyticus (strain ATCC 43494 / DSM 8903 / Tp8T 6331) GN=hisC PE=3 SV=1	Caldicellulosiruptor saccharolyticus DSM 8903	K00817	2.6.1.9		0	0	0	0	0	0	0	0	0	0	0	0.0038276
HIS8_DINSH Histidinol-phosphate aminotransferase OS=Dinoroseobacter shibae (strain DSM 16493 / NCIMB 14021 / DFL 12) GN=hisC PE=3 SV=1	Dinoroseobacter shibae DFL 12	K00817	2.6.1.9		0	0	0	0	0	0	0	0	0	0	0	0
HIS8_ROSDO Histidinol-phosphate aminotransferase OS=Roseobacter denitrificans (strain ATCC 33942 / OCh 114) GN=hisC PE=3 SV=1	Roseobacter denitrificans OCh 114	K00817	2.6.1.9		0	0	0	0	0	0	0	0	0	0	0	0
HIS81_PASMU Histidinol-phosphate aminotransferase 1 OS=Pasteurella multocida (strain Pm70) GN=hisC1 PE=3 SV=1	Pasteurella multocida subsp. multocida str. Pm70	K00817	2.6.1.9		0	0	0	0	0	0	0	0	0	0	0	0
ARCS_METJA Archaeosine synthase OS=Methanocaldococcus jannaschii (strain ATCC 43067 / DSM 2661 / JAL-1 / JCM 10045 / NBRC 100440) GN=arcS PE=1 SV=1	Methanocaldococcus jannaschii DSM 2661	K07557	2.6.1.97		0	0	0	0	0	0	0.00497934	0	0	0	0	0
MG: PTS-dependent dihydroxyacetone kinase, dihydroxyacetone-binding subunit DhaK OS=Lactococcus lactis subsp. lactis (strain IL1403) GN=dhaK PE=1 SV=2 [Q9CIV8] Score: 311.0	Lactococcus lactis subsp. lactis Il1403	K05878	2.7.-.-		0	0	0	0	0	0	0	0	0.0043262	0	0	0
Y5520_ARATH Uncharacterized aarF domain-containing protein kinase At5g05200, chloroplastic OS=Arabidopsis thaliana GN=At5g05200 PE=2 SV=1	Arabidopsis thaliana	K08869	2.7.-.-		0	0	0	0	0	0	0	0	0	0	0	0
LEVR_BACSU Transcriptional regulatory protein LevR OS=Bacillus subtilis (strain 168) GN=levR PE=3 SV=2	Bacillus subtilis subsp. subtilis str. 168	-	2.7.1.-		0	0	0	0	0	0	0.00497934	0	0	0.0036735	0	0
MG: Glucose-specific phosphotransferase enzyme IIA component OS=Staphylococcus epidermidis (strain ATCC 35984 / RP62A) GN=crr PE=3 SV=1 [Q5HPB5] Score: 137.0	Staphylococcus epidermidis	K02777	2.7.1.-		0	0	0	0	0	0	0.00497934	0.00315507	0	0	0.00365631	0.0038276
MG: Multiphosphoryl transfer protein OS=Escherichia coli O157:H7 GN=fruB PE=3 SV=1 [P69812] Score: 101.0	Escherichia coli	K02768 K11183	2.7.1.-		0	0	0	0	0	0	0.0199173	0.0189304	0.0259572	0	0.00365631	0.0038276
PTGA_ECOLI Glucose-specific phosphotransferase enzyme IIA component OS=Escherichia coli (strain K12) GN=crr PE=1 SV=2	Enterobacteriaceae	K02777	2.7.1.-		0.0433487	0.0328438	0	0.055949	0.0419698	0.0378714	0.0348554	0.0378609	0.0346096	0.0110205	0.0146252	0.0038276
PTGA_SALTI Glucose-specific phosphotransferase enzyme IIA component OS=Salmonella typhi GN=crr PE=1 SV=2	Enterobacteriaceae	K02777	2.7.1.-		0.0270929	0.00938394	0	0.0233121	0.0233165	0.0189357	0.014938	0.0126203	0.0173048	0	0.00365631	0
LYXK_ECOLI L-xylulose/3-keto-L-gulonate kinase OS=Escherichia coli (strain K12) GN=lyx PE=1 SV=1	Escherichia coli K-12	K00880	2.7.1.- 2.7.1.53		0	0	0	0	0	0	0	0	0	0	0	0
MG: Diacylglycerol kinase OS=Bacillus subtilis (strain 168) GN=dagK PE=1 SV=1 [O31502] Score: 184.0	Bacillus subtilis subsp. subtilis str. 168	K07029	2.7.1.107		0	0	0	0	0	0	0.00497934	0.00315507	0.0043262	0.0036735	0	0
MG: Diacylglycerol kinase OS=Staphylococcus carnosus (strain TM300) GN=dagK PE=3 SV=1 [B9DMT6] Score: 168.0	Staphylococcus carnosus subsp. carnosus TM300	K07029	2.7.1.107		0	0	0	0	0	0	0.00497934	0.00315507	0.0043262	0.0036735	0	0
DGK3_CAEEL Probable diacylglycerol kinase 3 OS=Caenorhabditis elegans GN=dgk-3 PE=3 SV=3	Caenorhabditis elegans	K00901	2.7.1.107		0	0	0	0	0	0	0	0	0	0.0036735	0	0
PFKA_DEIRA ATP-dependent 6-phosphofructokinase OS=Deinococcus radiodurans (strain ATCC 13939 / DSM 20539 / JCM 16871 / LMG 4051 / NBRC 15346 / NCIMB 9279 / R1 / VKM B-1422) GN=pfkA PE=3 SV=2	Deinococcus radiodurans R1	K00850	2.7.1.11		0	0	0	0	0	0	0.00497934	0	0.0043262	0	0	0
PFKA_AQUAE ATP-dependent 6-phosphofructokinase OS=Aquifex aeolicus (strain VF5) GN=pfkA PE=3 SV=1	Bacteria	K00850	2.7.1.11		0	0	0	0	0	0	0	0	0	0	0	0
PFKA2_CLOPE ATP-dependent 6-phosphofructokinase 2 OS=Clostridium perfringens (strain 13 / Type A) GN=pfkA2 PE=3 SV=1	Bacteria	K00850	2.7.1.11		0	0	0	0	0	0	0	0	0	0	0	0
PFKA_STRZT ATP-dependent 6-phosphofructokinase OS=Streptococcus pneumoniae (strain Taiwan19F-14) GN=pfkA PE=3 SV=1	Bacteria	K00850	2.7.1.11		0.0162558	0.00469197	0	0.00466242	0.00466331	0.00473393	0.00497934	0.00631014	0.0043262	0.0036735	0.00731261	0.0229656
PFKA1_CLOPE ATP-dependent 6-phosphofructokinase 1 OS=Clostridium perfringens (strain 13 / Type A) GN=pfkA1 PE=3 SV=1	Bacteria	K00850	2.7.1.11		0	0	0	0	0	0	0.0199173	0.0283956	0.021631	0.0183675	0.0146252	0.0306208
PFKA_BREBN ATP-dependent 6-phosphofructokinase OS=Brevibacillus brevis (strain 47 / JCM 6285 / NBRC 100599) GN=pfkA PE=3 SV=1	Bacteria	K00850	2.7.1.11		0.0162558	0.00469197	0	0.00466242	0.00466331	0.00473393	0.0248967	0.0315507	0.0259572	0.022041	0.0219378	0.0535865
PFKA_ANAVT ATP-dependent 6-phosphofructokinase OS=Anabaena variabilis (strain ATCC 29413 / PCC 7937) GN=pfkA PE=3 SV=1	Bacteria	K00850	2.7.1.11		0	0	0	0	0	0	0	0	0	0	0	0
PFKA_ASPNG ATP-dependent 6-phosphofructokinase OS=Aspergillus niger GN=pfkA PE=3 SV=1	Aspergillus niger	-	2.7.1.11		0	0	0	0	0	0	0.00497934	0	0.0043262	0	0	0
PFKA2_ASPOR ATP-dependent 6-phosphofructokinase 2 OS=Aspergillus oryzae (strain ATCC 42149 / RIB 40) GN=pfkB PE=2 SV=1	Aspergillus oryzae RIB40	K00850	2.7.1.11		0.0108372	0.00469197	0	0.00466242	0.00466331	0.00473393	0.00497934	0.00315507	0.0043262	0.0036735	0.0109689	0.019138
PFKA_DROME ATP-dependent 6-phosphofructokinase OS=Drosophila melanogaster GN=Pfk PE=2 SV=2	Drosophila melanogaster	K00850	2.7.1.11		0	0	0	0	0	0	0	0	0	0	0	0
PFKA_DICDI ATP-dependent 6-phosphofructokinase OS=Dictyostelium discoideum GN=pfkA PE=1 SV=2	Dictyostelium discoideum	K00850	2.7.1.11		0	0	0.0111575	0	0	0	0	0	0	0	0	0
LPXK_CHLMU Tetraacyldisaccharide 4-kinase OS=Chlamydia muridarum (strain MoPn / Nigg) GN=lpxK PE=3 SV=1	Chlamydia muridarum Nigg	K00912	2.7.1.130		0	0.00469197	0.00557877	0	0	0	0	0	0	0	0	0
LPXK_RHOP5 Tetraacyldisaccharide 4-kinase OS=Rhodopseudomonas palustris (strain BisA53) GN=lpxK PE=3 SV=1	Rhodopseudomonas palustris BisA53	K00912	2.7.1.130		0	0	0	0	0	0	0	0	0.0043262	0	0	0.0038276
LPXK_OLICO Tetraacyldisaccharide 4-kinase OS=Oligotropha carboxidovorans (strain ATCC 49405 / DSM 1227 / OM5) GN=lpxK PE=3 SV=1	root	K00912	2.7.1.130		0	0	0	0	0	0	0	0	0	0.0036735	0.00365631	0
ISPE_GEOSW 4-diphosphocytidyl-2-C-methyl-D-erythritol kinase OS=Geobacillus sp. (strain WCH70) GN=ispE PE=3 SV=1	Geobacillus sp. WCH70	K00919	2.7.1.148		0	0	0	0	0	0	0.00497934	0	0	0	0	0
ISPE_SACD2 4-diphosphocytidyl-2-C-methyl-D-erythritol kinase OS=Saccharophagus degradans (strain 2-40 / ATCC 43961 / DSM 17024) GN=ispE PE=3 SV=1	Saccharophagus degradans 2-40	K00919	2.7.1.148		0	0	0	0	0	0	0	0	0.0043262	0	0	0
ISPE_SHEB5 4-diphosphocytidyl-2-C-methyl-D-erythritol kinase OS=Shewanella baltica (strain OS155 / ATCC BAA-1091) GN=ispE PE=3 SV=1	Shewanella baltica	K00919	2.7.1.148		0	0	0	0.00466242	0.00932662	0.00473393	0	0	0	0	0	0
RBSK_ECO57 Ribokinase OS=Escherichia coli O157:H7 GN=rbsK PE=3 SV=1	Escherichia coli	K00852	2.7.1.15		0	0	0	0	0	0	0	0	0	0	0	0
FYV1_HUMAN 1-phosphatidylinositol 3-phosphate 5-kinase OS=Homo sapiens GN=PIKFYVE PE=1 SV=3	Homo sapiens	K00921	2.7.1.150		0	0	0	0	0	0	0.0398347	0.0252406	0.0302834	0.0330615	0.0146252	0.0114828
ARAB_ENT38 Ribulokinase OS=Enterobacter sp. (strain 638) GN=araB PE=3 SV=1	Enterobacter sp. 638	K00853	2.7.1.16		0	0	0	0	0	0	0	0	0	0	0.00365631	0
ARAB_ECOSE Ribulokinase OS=Escherichia coli (strain SE11) GN=araB PE=3 SV=1	Enterobacteriaceae	K00853	2.7.1.16		0	0	0	0	0	0	0	0	0	0	0	0.00765521
XYLB_ECOLI Xylulose kinase OS=Escherichia coli (strain K12) GN=xylB PE=1 SV=1	Escherichia coli K-12	K00854	2.7.1.17		0	0	0	0	0	0	0	0	0	0	0	0.0038276
ANMK_SYNS3 Anhydro-N-acetylmuramic acid kinase OS=Synechococcus sp. (strain CC9311) GN=anmK PE=3 SV=1	Synechococcus sp. CC9311	K09001	2.7.1.170		0	0	0	0	0	0	0	0	0.0043262	0	0	0
KPPR_PINPS Phosphoribulokinase (Fragments) OS=Pinus pinaster PE=1 SV=1	Streptophyta	-	2.7.1.19		0	0	0	0	0	0	0	0	0	0	0	0
KPPR_CHLRE Phosphoribulokinase, chloroplastic OS=Chlamydomonas reinhardtii GN=PRKA PE=1 SV=1	Viridiplantae	K00855	2.7.1.19		0	0	0	0	0	0	0	0	0	0	0	0
KPPR_SPIOL Phosphoribulokinase, chloroplastic OS=Spinacia oleracea PE=1 SV=1	Viridiplantae	-	2.7.1.19		0	0	0	0	0	0	0	0	0	0	0	0
KPPR_VITSX Phosphoribulokinase, chloroplastic (Fragments) OS=Vitis sp. PE=1 SV=1	Viridiplantae	-	2.7.1.19		0	0	0	0	0	0	0	0	0	0	0	0
PTNAB_STRP6 PTS system mannose-specific EIIAB component OS=Streptococcus pyogenes serotype M6 (strain ATCC BAA-946 / MGAS10394) GN=manX PE=1 SV=1	Streptococcus pyogenes MGAS10394	K02793 K02794	2.7.1.191		0	0	0	0	0	0	0.00995867	0.0126203	0.0129786	0.0183675	0.0219378	0.0306208
PTNAB_ECO57 PTS system mannose-specific EIIAB component OS=Escherichia coli O157:H7 GN=manX PE=3 SV=2	Escherichia coli O157:H7	K02793 K02794	2.7.1.191		0.00541859	0.0140759	0	0.0326369	0.0326432	0.0331375	0.07469	0.0473261	0.0692191	0.014694	0.0109689	0.0038276
PTW3C_ECOLI PTS system N-acetylglucosamine-specific EIICBA component OS=Escherichia coli (strain K12) GN=nagE PE=3 SV=1	Escherichia coli K-12	K02802 K02803 K02804	2.7.1.193		0	0	0	0	0	0	0.00995867	0.00631014	0	0	0	0.00765521
MG: PTS system glucose-specific EIICBA component OS=Bacillus subtilis (strain 168) GN=ptsG PE=1 SV=2 [P20166] Score: 469.0	Bacillus subtilis subsp. subtilis str. 168	K20116 K20117 K20118	2.7.1.199		0	0	0	0	0	0	0	0	0	0	0	0
MG: Glucokinase OS=Bacillus halodurans (strain ATCC BAA-125 / DSM 18197 / FERM 7344 / JCM 9153 / C-125) GN=glcK PE=3 SV=1 [Q9KCZ4] Score: 249.0	Bacillus halodurans C-125	K00845	2.7.1.2		0.00541859	0.00469197	0	0	0.00466331	0	0	0	0	0	0	0
GLK_AROAE Glucokinase OS=Aromatoleum aromaticum (strain EbN1) GN=glk PE=3 SV=1	Aromatoleum aromaticum EbN1	K00845	2.7.1.2		0	0	0	0	0	0	0	0	0.0043262	0	0	0
ADOK_MYCTO Adenosine kinase OS=Mycobacterium tuberculosis (strain CDC 1551 / Oshkosh) GN=adoK PE=3 SV=1	Mycobacterium	K00856	2.7.1.20		0	0	0	0	0	0	0	0	0	0	0	0
MG: Cellobiose-specific phosphotransferase enzyme IIB component OS=Geobacillus stearothermophilus GN=celA PE=3 SV=1 [Q45399] Score: 99.4	Geobacillus stearothermophilus	-	2.7.1.205		0	0	0	0	0	0	0	0	0.0043262	0.0036735	0	0.0038276
KITH_EHV1B Thymidine kinase OS=Equine herpesvirus 1 (strain Ab4p) GN=TK PE=3 SV=1	Equid herpesvirus 1	-	2.7.1.21		0	0	0.00557877	0	0	0	0	0	0	0	0	0
NADK1_PROMM NAD kinase 1 OS=Prochlorococcus marinus (strain MIT 9313) GN=nadK1 PE=3 SV=1	Prochlorococcus marinus str. MIT 9313	-	2.7.1.23		0	0	0	0	0	0	0	0	0	0	0	0
NADK_CHRSD NAD kinase OS=Chromohalobacter salexigens (strain DSM 3043 / ATCC BAA-138 / NCIMB 13768) GN=nadK PE=3 SV=1	Chromohalobacter salexigens DSM 3043	K00858	2.7.1.23		0	0	0	0	0	0	0	0	0	0	0	0
COAE_LACPL Dephospho-CoA kinase OS=Lactobacillus plantarum (strain ATCC BAA-793 / NCIMB 8826 / WCFS1) GN=coaE PE=3 SV=2	Lactobacillus plantarum WCFS1	K00859	2.7.1.24		0	0	0	0	0	0	0	0	0	0	0	0
GLPK_ALISL Glycerol kinase OS=Aliivibrio salmonicida (strain LFI1238) GN=glpK PE=3 SV=1	Aliivibrio salmonicida LFI1238	K00864	2.7.1.30		0	0	0	0	0	0	0	0.00315507	0	0	0	0
GLPK_PSE14 Glycerol kinase OS=Pseudomonas savastanoi pv. phaseolicola (strain 1448A / Race 6) GN=glpK PE=3 SV=1	Proteobacteria	K00864	2.7.1.30		0	0	0	0	0	0	0	0	0.0043262	0	0	0
GLPK_RHILO Glycerol kinase OS=Rhizobium loti (strain MAFF303099) GN=glpK PE=3 SV=1	Bacteria	K00864	2.7.1.30		0	0	0	0	0	0	0	0	0.0043262	0	0	0
GLPK_ECO7I Glycerol kinase OS=Escherichia coli O7:K1 (strain IAI39 / ExPEC) GN=glpK PE=3 SV=1	Bacteria	K00864	2.7.1.30		0	0	0	0	0	0	0.00497934	0	0.00865239	0	0	0
GLPK_SHESW Glycerol kinase OS=Shewanella sp. (strain W3-18-1) GN=glpK PE=3 SV=1	Bacteria	K00864	2.7.1.30		0	0	0	0	0	0	0.00497934	0	0.00865239	0	0	0
GLPK_COXBU Glycerol kinase OS=Coxiella burnetii (strain RSA 493 / Nine Mile phase I) GN=glpK PE=3 SV=1	Bacteria	K00864	2.7.1.30		0	0	0	0	0	0	0	0	0.0043262	0	0	0
GLPK_STAS1 Glycerol kinase OS=Staphylococcus saprophyticus subsp. saprophyticus (strain ATCC 15305 / DSM 20229) GN=glpK PE=3 SV=1	Bacteria	K00864	2.7.1.30		0	0	0	0	0	0	0	0	0.00865239	0	0	0
KICH_YEAST Choline kinase OS=Saccharomyces cerevisiae (strain ATCC 204508 / S288c) GN=CKI1 PE=1 SV=1	Saccharomyces cerevisiae S288c	K00866	2.7.1.32		0	0	0	0	0	0	0.00497934	0	0	0	0	0
COAX_ELUMP Type III pantothenate kinase OS=Elusimicrobium minutum (strain Pei191) GN=coaX PE=3 SV=1	Elusimicrobium minutum Pei191	K03525	2.7.1.33		0	0	0	0	0	0	0	0	0	0	0	0
COAX_CUPMC Type III pantothenate kinase OS=Cupriavidus metallidurans (strain ATCC 43123 / DSM 2839 / NBRC 102507 / CH34) GN=coaX PE=3 SV=1	Cupriavidus metallidurans CH34	K03525	2.7.1.33		0	0	0	0	0	0	0	0	0	0	0	0
COAX_PSEPK Type III pantothenate kinase OS=Pseudomonas putida (strain KT2440) GN=coaX PE=3 SV=1	Pseudomonas putida	K03525	2.7.1.33		0	0	0	0	0	0	0	0	0	0	0	0
KHSE_BACLD Homoserine kinase OS=Bacillus licheniformis (strain ATCC 14580 / DSM 13 / JCM 2505 / NBRC 12200 / NCIMB 9375 / NRRL NRS-1264 / Gibson 46) GN=thrB PE=3 SV=1	Bacillus licheniformis DSM 13 = ATCC 14580	K00872	2.7.1.39		0	0.00469197	0	0	0.00466331	0	0	0	0	0	0	0
KHSE_NEIMA Homoserine kinase OS=Neisseria meningitidis serogroup A / serotype 4A (strain Z2491) GN=thrB PE=3 SV=2	Neisseria meningitidis Z2491	K02204	2.7.1.39		0	0	0	0	0	0	0	0	0	0	0	0
KHSE_XYLF2 Homoserine kinase OS=Xylella fastidiosa (strain M23) GN=thrB PE=3 SV=1	Xylella fastidiosa M23	K00872	2.7.1.39		0	0	0	0	0	0	0	0	0.0043262	0	0	0
KPYK_MYCIT Pyruvate kinase OS=Mycobacterium intracellulare GN=pyk PE=3 SV=1	Mycobacterium intracellulare	-	2.7.1.40		0	0	0	0	0	0	0	0	0	0	0.00365631	0
MG: Pyruvate kinase OS=Geobacillus stearothermophilus GN=pyk PE=1 SV=2 [Q02499] Score: 515.0	Geobacillus stearothermophilus	-	2.7.1.40		0	0.00469197	0.00557877	0.00466242	0.00466331	0.00473393	0.00497934	0.00315507	0.0043262	0.0036735	0.00365631	0.0038276
KPYK_LACDE Pyruvate kinase OS=Lactobacillus delbrueckii subsp. bulgaricus GN=pyk PE=1 SV=3	Lactobacillus delbrueckii subsp. bulgaricus	-	2.7.1.40		0	0	0	0	0	0	0	0	0	0	0	0
KPYK_LACLA Pyruvate kinase OS=Lactococcus lactis subsp. lactis (strain IL1403) GN=pyk PE=3 SV=2	Lactococcus lactis subsp. lactis Il1403	K00873	2.7.1.40		0.0270929	0.0140759	0.0223151	0.0186497	0.0233165	0.0236696	0.00497934	0.00315507	0.00865239	0	0.0146252	0
MG: Pyruvate kinase OS=Clostridium acetobutylicum (strain ATCC 824 / DSM 792 / JCM 1419 / LMG 5710 / VKM B-1787) GN=pyk PE=3 SV=2 [O08309] Score: 429.0	Clostridium acetobutylicum ATCC 824	K00873	2.7.1.40		0	0	0	0	0	0	0	0.00315507	0.0043262	0.0036735	0.00365631	0
KPYK2_SALTY Pyruvate kinase II OS=Salmonella typhimurium (strain LT2 / SGSC1412 / ATCC 700720) GN=pykA PE=3 SV=3	Enterobacteriaceae	K00873	2.7.1.40		0	0	0	0	0	0	0.00497934	0.00315507	0.0043262	0	0	0
KPYK1_PHOLE Pyruvate kinase I (Fragment) OS=Photobacterium leiognathi GN=pki PE=3 SV=1	Gammaproteobacteria	K00873	2.7.1.40		0.0216743	0.0281518	0.0278938	0.0372993	0.0233165	0.0378714	0.044814	0.0473261	0.0475881	0.022041	0.0146252	0.00765521
URK_STRU0 Uridine kinase OS=Streptococcus uberis (strain ATCC BAA-854 / 0140J) GN=udk PE=3 SV=1	Streptococcus uberis 0140J	K00876	2.7.1.48		0	0	0	0	0	0	0	0	0	0	0	0
URK_MYCGE Uridine kinase OS=Mycoplasma genitalium (strain ATCC 33530 / G-37 / NCTC 10195) GN=udk PE=3 SV=1	Mycoplasma genitalium G37	K00876	2.7.1.48		0	0	0	0	0	0	0	0	0	0	0	0
UCK_CAEEL Probable uridine-cytidine kinase OS=Caenorhabditis elegans GN=B0001.4 PE=3 SV=2	Caenorhabditis elegans	K00876	2.7.1.48		0	0	0	0	0	0	0	0	0	0	0	0
MG: Hydroxymethylpyrimidine/phosphomethylpyrimidine kinase OS=Escherichia coli (strain K12) GN=thiD PE=1 SV=1 [P76422] Score: 332.0	Enterobacteriaceae	K00941	2.7.1.49 2.7.4.7		0	0	0	0.0372993	0	0	0	0	0	0	0	0
THIM_LISMH Hydroxyethylthiazole kinase OS=Listeria monocytogenes serotype 4a (strain HCC23) GN=thiM PE=3 SV=1	Listeria monocytogenes HCC23	K00878	2.7.1.50		0	0	0	0.00466242	0	0	0	0	0	0	0	0
THIM_DESAH Hydroxyethylthiazole kinase OS=Desulfobacterium autotrophicum (strain ATCC 43914 / DSM 3382 / HRM2) GN=thiM PE=3 SV=1	Desulfobacterium autotrophicum HRM2	K00878	2.7.1.50		0	0	0	0	0	0	0	0	0	0	0	0
THIM_TOLAT Hydroxyethylthiazole kinase OS=Tolumonas auensis (strain DSM 9187 / TA4) GN=thiM PE=3 SV=1	Tolumonas auensis DSM 9187	K00878	2.7.1.50		0	0	0	0	0	0	0	0	0.0043262	0	0	0
K1PF_SHIFL 1-phosphofructokinase OS=Shigella flexneri GN=fruK PE=3 SV=1	Enterobacteriaceae	K00882	2.7.1.56		0	0	0	0	0	0	0.00497934	0.00315507	0.00865239	0	0	0
MG: Undecaprenol kinase OS=Streptococcus mutans serotype c (strain ATCC 700610 / UA159) GN=dgkA PE=1 SV=2 [Q05888] Score: 77.8	Streptococcus mutans UA159	K00887	2.7.1.66		0	0	0	0	0	0	0	0	0	0	0	0
PI5K7_ARATH Phosphatidylinositol 4-phosphate 5-kinase 7 OS=Arabidopsis thaliana GN=PIP5K7 PE=1 SV=1	Arabidopsis thaliana	K00889	2.7.1.68		0	0	0	0	0	0	0	0	0	0	0	0
MG: Shikimate kinase OS=Clostridium botulinum (strain Eklund 17B / Type B) GN=aroK PE=3 SV=1 [B2TQ47] Score: 155.0	Clostridium botulinum B str. Eklund 17B(NRP)	K00891	2.7.1.71		0	0	0	0	0	0	0	0	0	0	0	0
AROK_NITWN Shikimate kinase OS=Nitrobacter winogradskyi (strain Nb-255 / ATCC 25391) GN=aroK PE=3 SV=1	Nitrobacter winogradskyi Nb-255	K00891	2.7.1.71		0	0	0	0	0	0	0	0	0	0	0	0.0038276
AROK_CHRSD Shikimate kinase OS=Chromohalobacter salexigens (strain DSM 3043 / ATCC BAA-138 / NCIMB 13768) GN=aroK PE=3 SV=1	Chromohalobacter salexigens DSM 3043	K00891	2.7.1.71		0	0	0	0	0	0	0	0	0	0	0	0
AROK_ACIBS Shikimate kinase OS=Acinetobacter baumannii (strain SDF) GN=aroK PE=3 SV=1	Acinetobacter baumannii SDF	K00891	2.7.1.71		0	0	0	0	0	0	0	0	0	0	0	0
FGFR2_DUGJA Fibroblast growth factor receptor 2 OS=Dugesia japonica GN=FGFR2 PE=2 SV=1	Dugesia japonica	-	2.7.10.1		0	0	0	0	0	0	0	0	0	0	0	0.0038276
D2HMQ8_AILME Tyrosine-protein kinase (Fragment) OS=Ailuropoda melanoleuca GN=PANDA_012892 PE=3 SV=1	Ailuropoda melanoleuca	-	2.7.10.2		0	0	0	0	0	0	0	0	0	0	0	0.0038276
FGR_FSVGR Tyrosine-protein kinase transforming protein Fgr OS=Feline sarcoma virus (strain Gardner-Rasheed) GN=V-FGR PE=3 SV=1	root	-	2.7.10.2		0	0.00469197	0	0	0	0	0	0	0	0.0036735	0	0.0038276
PTHP_LACLC Phosphocarrier protein HPr OS=Lactococcus lactis subsp. cremoris GN=ptsH PE=3 SV=1	Lactobacillales	-	2.7.11.-		0.0270929	0.0328438	0.00557877	0.0186497	0.0139899	0.00946786	0.119504	0.129358	0.121133	0.095511	0.0987203	0.164587
PTHP_ENTFA Phosphocarrier protein HPr OS=Enterococcus faecalis (strain ATCC 700802 / V583) GN=ptsH PE=1 SV=2	Lactobacillales	-	2.7.11.-		0	0	0	0	0	0	0	0.00315507	0	0	0	0.0038276
PTHP_KLEPN Phosphocarrier protein HPr OS=Klebsiella pneumoniae GN=ptsH PE=3 SV=1	Klebsiella pneumoniae	-	2.7.11.-		0	0	0	0	0	0	0	0	0	0	0	0
PTHP_SHIFL Phosphocarrier protein HPr OS=Shigella flexneri GN=ptsH PE=3 SV=1	Enterobacteriaceae	K02784	2.7.11.-		0	0	0	0	0	0	0	0	0.00865239	0	0	0
Y5516_ARATH Probable leucine-rich repeat receptor-like protein kinase At5g05160 OS=Arabidopsis thaliana GN=At5g05160 PE=2 SV=1	Arabidopsis thaliana	-	2.7.11.-		0	0	0	0	0	0	0	0	0	0	0.00365631	0
HPRK_STRZT HPr kinase/phosphorylase OS=Streptococcus pneumoniae (strain Taiwan19F-14) GN=hprK PE=3 SV=1	Streptococcus	K06023	2.7.11.- 2.7.4.-		0	0	0	0	0	0	0	0	0	0	0	0
MG: Anti-sigma F factor OS=Clostridium kluyveri (strain NBRC 12016) GN=spoIIAB PE=3 SV=1 [B9E5R9] Score: 195.0	Clostridium kluyveri	K06379	2.7.11.1		0	0	0	0	0	0	0	0.00315507	0	0	0.00365631	0
KJ45_SCHPO Probable serine/threonine-protein kinase C70.05c OS=Schizosaccharomyces pombe (strain 972 / ATCC 24843) GN=SPCC70.05c PE=1 SV=1	Schizosaccharomyces pombe 972h-	K08286	2.7.11.1		0	0	0	0	0	0	0	0	0.0043262	0	0	0
PRKDC_XENLA DNA-dependent protein kinase catalytic subunit OS=Xenopus laevis GN=prkdc PE=2 SV=1	Xenopus laevis	K06642	2.7.11.1		0	0	0	0	0	0	0	0	0	0.0036735	0	0
STK10_XENLA Serine/threonine-protein kinase 10-A OS=Xenopus laevis GN=stk10-a PE=1 SV=1	Xenopus laevis	K08837	2.7.11.1		0	0	0	0	0	0	0	0	0.0043262	0	0	0
ST17A_HUMAN Serine/threonine-protein kinase 17A OS=Homo sapiens GN=STK17A PE=1 SV=2	Homo sapiens	K08804	2.7.11.1		0	0	0	0	0	0	0	0	0	0	0	0
CTRO_HUMAN Citron Rho-interacting kinase OS=Homo sapiens GN=CIT PE=1 SV=2	Mammalia	K16308	2.7.11.1		0	0	0	0	0	0	0	0	0	0	0	0
G1MC31_AILME Uncharacterized protein OS=Ailuropoda melanoleuca GN=CIT PE=3 SV=1	Mammalia	-	2.7.11.1		0	0	0	0	0	0	0	0	0	0	0	0
SULU_CAEEL Serine/threonine-protein kinase SULU OS=Caenorhabditis elegans GN=kin-18 PE=2 SV=1	Caenorhabditis elegans	K04429	2.7.11.1		0	0	0	0	0	0	0	0	0	0.0036735	0	0
UNC22_CAEEL Twitchin OS=Caenorhabditis elegans GN=unc-22 PE=1 SV=3	Caenorhabditis elegans	-	2.7.11.1		0	0	0.00557877	0	0	0	0.00497934	0	0	0	0	0
KC1_PLAYO Casein kinase I OS=Plasmodium yoelii yoelii GN=CK1 PE=3 SV=1	Plasmodium	K02218	2.7.11.1		0	0	0	0	0	0	0	0	0	0	0	0
TSUA_DICDI Probable serine/threonine-protein kinase tsuA OS=Dictyostelium discoideum GN=tsuA PE=1 SV=1	Dictyostelium discoideum	K06228	2.7.11.1		0	0	0	0	0	0	0	0	0	0	0	0
Y8642_DICDI Probable serine/threonine-protein kinase DDB_G0268642 OS=Dictyostelium discoideum GN=DDB_G0268642 PE=3 SV=1	Dictyostelium discoideum	K08860	2.7.11.1		0	0	0	0	0	0	0	0	0	0	0	0
Y3958_DICDI Probable serine/threonine-protein kinase DDB_G0293958 OS=Dictyostelium discoideum GN=DDB_G0293958 PE=3 SV=1	Dictyostelium discoideum	-	2.7.11.1		0	0	0	0	0	0	0	0	0	0	0	0
PDPKB_DICDI 3-phosphoinositide-dependent protein kinase B OS=Dictyostelium discoideum GN=pdkB PE=3 SV=1	Dictyostelium discoideum	K06276	2.7.11.1		0	0	0	0	0	0	0.00497934	0	0	0	0	0
Y9628_DICDI Probable serine/threonine-protein kinase DDB_G0269628 OS=Dictyostelium discoideum GN=DDB_G0269628 PE=3 SV=1	Dictyostelium discoideum	-	2.7.11.1		0	0	0	0	0	0.00473393	0	0	0	0	0	0
MSP1_ORYSJ Leucine-rich repeat receptor protein kinase MSP1 OS=Oryza sativa subsp. japonica GN=MSP1 PE=1 SV=1	Oryza sativa Japonica Group	-	2.7.11.1		0	0	0	0	0	0	0	0	0	0	0	0
IMK3_ARATH Probable leucine-rich repeat receptor-like protein kinase IMK3 OS=Arabidopsis thaliana GN=IMK3 PE=1 SV=1	Arabidopsis thaliana	-	2.7.11.1		0	0	0	0	0	0	0	0	0	0	0	0
Y1675_ARATH G-type lectin S-receptor-like serine/threonine-protein kinase At1g67520 OS=Arabidopsis thaliana GN=At1g67520 PE=2 SV=3	Arabidopsis thaliana	-	2.7.11.1		0	0	0	0	0	0	0	0	0	0	0	0
Y2899_ARATH Probable leucine-rich repeat receptor-like protein kinase At2g28990 OS=Arabidopsis thaliana GN=At2g28990 PE=2 SV=1	Arabidopsis thaliana	-	2.7.11.1		0	0	0	0	0	0	0	0	0	0	0	0
Y4265_ARATH Probable LRR receptor-like serine/threonine-protein kinase At4g26540 OS=Arabidopsis thaliana GN=At4g26540 PE=2 SV=1	Arabidopsis thaliana	-	2.7.11.1		0	0	0	0	0	0	0	0	0	0	0	0
HT1_ARATH Serine/threonine-protein kinase HT1 OS=Arabidopsis thaliana GN=HT1 PE=1 SV=1	Arabidopsis thaliana	-	2.7.11.1		0	0.00469197	0	0	0	0.00473393	0	0	0	0.0036735	0	0
APK2A_ARATH Protein kinase 2A, chloroplastic OS=Arabidopsis thaliana GN=APK2A PE=2 SV=1	Arabidopsis thaliana	K00924	2.7.11.1		0	0	0	0.00466242	0	0	0	0	0	0	0	0
CRK1_ARATH Cysteine-rich receptor-like protein kinase 1 OS=Arabidopsis thaliana GN=CRK1 PE=2 SV=2	root	-	2.7.11.1		0	0	0	0	0	0	0	0	0.0043262	0	0	0
KPC1_HYPJE Protein kinase C-like OS=Hypocrea jecorina GN=pkc1 PE=3 SV=1	Trichoderma reesei	-	2.7.11.13		0	0	0	0	0	0	0	0	0	0	0	0
PKN_DROME Serine/threonine-protein kinase N OS=Drosophila melanogaster GN=Pkn PE=1 SV=1	Drosophila melanogaster	K06071	2.7.11.13		0	0	0	0	0	0	0	0	0	0	0	0
GRK7B_XENLA Rhodopsin kinase 2 OS=Xenopus laevis GN=grk7-b PE=1 SV=1	Xenopus laevis	K00909	2.7.11.14		0	0	0	0	0	0	0.00995867	0.00315507	0.0043262	0	0	0
POLO_DROME Serine/threonine-protein kinase polo OS=Drosophila melanogaster GN=polo PE=1 SV=2	Drosophila melanogaster	K06631	2.7.11.21		0	0	0	0	0	0	0	0	0	0	0	0
PLK4_DROER Serine/threonine-protein kinase PLK4 OS=Drosophila erecta GN=SAK PE=3 SV=1	Drosophila	K08863	2.7.11.21		0	0	0	0	0	0	0	0	0	0	0	0
CDKL3_MACFA Cyclin-dependent kinase-like 3 OS=Macaca fascicularis GN=CDKL3 PE=2 SV=1	Mammalia	K08824	2.7.11.22		0	0	0	0	0	0	0	0	0	0	0	0
SSK2_YEAST MAP kinase kinase kinase SSK2 OS=Saccharomyces cerevisiae (strain ATCC 204508 / S288c) GN=SSK2 PE=1 SV=1	Saccharomyces cerevisiae S288c	K11230	2.7.11.25		0	0	0	0	0	0	0	0	0	0	0	0
M3K1_ARATH Mitogen-activated protein kinase kinase kinase 1 OS=Arabidopsis thaliana GN=MEKK1 PE=1 SV=2	Arabidopsis thaliana	K13414	2.7.11.25		0	0	0	0	0.00466331	0	0	0	0	0	0	0
BMR1B_CHICK Bone morphogenetic protein receptor type-1B OS=Gallus gallus GN=BMPR1B PE=2 SV=1	Gallus gallus	K13578	2.7.11.30		0	0	0	0	0	0	0	0	0	0	0	0
ACVL1_MOUSE Serine/threonine-protein kinase receptor R3 OS=Mus musculus GN=Acvrl1 PE=1 SV=2	Mus musculus	K13594	2.7.11.30		0	0	0	0	0	0	0	0	0.0043262	0	0	0
PDRP_LACJO Putative pyruvate, phosphate dikinase regulatory protein OS=Lactobacillus johnsonii (strain CNCM I-12250 / La1 / NCC 533) GN=LJ_1326 PE=3 SV=1	Lactobacillus	K09773	2.7.11.32 2.7.4.27		0	0	0	0	0	0	0	0	0	0	0	0
PDRP_NITWN Putative pyruvate, phosphate dikinase regulatory protein OS=Nitrobacter winogradskyi (strain Nb-255 / ATCC 25391) GN=Nwi_0102 PE=3 SV=1	Nitrobacter winogradskyi Nb-255	K09773	2.7.11.32 2.7.4.27		0	0	0	0	0	0.00473393	0	0	0	0	0	0
PSRP_AROAE Putative phosphoenolpyruvate synthase regulatory protein OS=Aromatoleum aromaticum (strain EbN1) GN=AZOSEA33100 PE=3 SV=1	Aromatoleum aromaticum EbN1	K09773	2.7.11.33 2.7.4.28		0.00541859	0	0	0	0.00466331	0	0	0	0	0.0036735	0	0
BCKD_MOUSE [3-methyl-2-oxobutanoate dehydrogenase [lipoamide]] kinase, mitochondrial OS=Mus musculus GN=Bckdk PE=1 SV=1	Mus musculus	K00905	2.7.11.4		0	0	0	0	0	0	0	0	0	0	0	0
KINE_BACSU Sporulation kinase E OS=Bacillus subtilis (strain 168) GN=kinE PE=1 SV=1	Bacillus subtilis subsp. subtilis str. 168	K13533	2.7.13.3		0	0	0	0	0	0	0	0	0	0	0	0
TMOS_PSEME Sensor histidine kinase TmoS OS=Pseudomonas mendocina GN=tmoS PE=1 SV=1	Pseudomonas mendocina	-	2.7.13.3		0	0	0	0	0	0.00473393	0	0	0	0	0	0
ARGB_PYRHO Acetylglutamate/acetylaminoadipate kinase OS=Pyrococcus horikoshii (strain ATCC 700860 / DSM 12428 / JCM 9974 / NBRC 100139 / OT-3) GN=argB PE=3 SV=1	Pyrococcus	K05828	2.7.2.- 2.7.2.8		0	0	0	0	0	0	0	0	0	0	0	0
MG: Acetate kinase OS=Clostridium beijerinckii (strain ATCC 51743 / NCIMB 8052) GN=ackA PE=3 SV=1 [A6LSL7] Score: 385.0	Clostridium beijerinckii NCIMB 8052	K00925	2.7.2.1		0	0	0	0	0	0	0	0	0	0	0	0
ACKA_CLONN Acetate kinase OS=Clostridium novyi (strain NT) GN=ackA PE=3 SV=1	Clostridium novyi NT	K00925	2.7.2.1		0	0.00469197	0	0	0	0	0	0	0.0043262	0	0	0
MG: Acetate kinase OS=Clostridium botulinum (strain ATCC 19397 / Type A) GN=ackA PE=3 SV=1 [A7FW24] Score: 497.0	Clostridium	K00925	2.7.2.1		0	0	0	0	0	0	0.014938	0.00946522	0.0129786	0	0.0109689	0.00765521
ACKA_ECO57 Acetate kinase OS=Escherichia coli O157:H7 GN=ackA PE=3 SV=1	Enterobacteriaceae	K00925	2.7.2.1		0.00541859	0.00938394	0.00557877	0.00932484	0.0139899	0.00946786	0.00497934	0.00946522	0.00865239	0.0036735	0.00731261	0.0038276
ACKA_PSEMY Acetate kinase OS=Pseudomonas mendocina (strain ymp) GN=ackA PE=3 SV=1	Pseudomonas mendocina ymp	K00925	2.7.2.1		0	0	0	0	0	0	0	0	0	0.0036735	0	0
ACKA_STAS1 Acetate kinase OS=Staphylococcus saprophyticus subsp. saprophyticus (strain ATCC 15305 / DSM 20229) GN=ackA PE=3 SV=1	Bacteria	K00925	2.7.2.1		0	0	0	0	0	0	0.00497934	0.00315507	0.0043262	0.014694	0.0109689	0.00765521
ACKA_THETC Acetate kinase OS=Thermoanaerobacterium thermosaccharolyticum (strain ATCC 7956 / DSM 571 / NCIB 9385 / NCA 3814) GN=ackA PE=3 SV=2	Bacteria	K00925	2.7.2.1		0	0	0	0	0	0	0.00497934	0.00315507	0.0043262	0.014694	0.0109689	0.00765521
ACKA_DESHY Acetate kinase OS=Desulfitobacterium hafniense (strain Y51) GN=ackA PE=3 SV=1	Bacteria	K00925	2.7.2.1		0	0	0	0	0	0	0.014938	0.00946522	0.0129786	0.014694	0.0182815	0.0153104
ACKA_STACT Acetate kinase OS=Staphylococcus carnosus (strain TM300) GN=ackA PE=3 SV=1	Bacteria	K00925	2.7.2.1		0	0	0	0	0	0	0.00497934	0.00315507	0.0043262	0.014694	0.0109689	0.0114828
ACKA_HELHP Acetate kinase OS=Helicobacter hepaticus (strain ATCC 51449 / 3B1) GN=ackA PE=3 SV=1	Bacteria	K00925	2.7.2.1		0	0	0	0	0	0	0.0199173	0.0126203	0.0173048	0.014694	0.0219378	0.0153104
PROB_CORDI Glutamate 5-kinase OS=Corynebacterium diphtheriae (strain ATCC 700971 / NCTC 13129 / Biotype gravis) GN=proB PE=3 SV=1	Corynebacterium diphtheriae NCTC 13129	K00931	2.7.2.11		0	0	0	0	0	0	0	0	0	0	0	0
PROB_SYNP2 Glutamate 5-kinase OS=Synechococcus sp. (strain ATCC 27264 / PCC 7002 / PR-6) GN=proB PE=3 SV=1	Synechococcus sp. PCC 7002	K00931	2.7.2.11		0	0	0	0	0	0	0	0.00315507	0	0	0	0
PGK_BACTN Phosphoglycerate kinase OS=Bacteroides thetaiotaomicron (strain ATCC 29148 / DSM 2079 / NCTC 10582 / E50 / VPI-5482) GN=pgk PE=3 SV=1	Bacteroides thetaiotaomicron VPI-5482	K00927	2.7.2.3		0	0	0	0	0	0	0.00497934	0.00315507	0.0043262	0	0.00731261	0.00765521
PGK_LACJO Phosphoglycerate kinase OS=Lactobacillus johnsonii (strain CNCM I-12250 / La1 / NCC 533) GN=pgk PE=3 SV=1	Lactobacillus	K00927	2.7.2.3		0	0	0	0	0	0	0	0	0	0	0	0
PGK_LISMO Phosphoglycerate kinase OS=Listeria monocytogenes serovar 1/2a (strain ATCC BAA-679 / EGD-e) GN=pgk PE=3 SV=1	Bacilli	K00927	2.7.2.3		0	0	0	0	0	0	0.00995867	0.0126203	0.00865239	0	0	0.0038276
MG: Phosphoglycerate kinase OS=Clostridium beijerinckii (strain ATCC 51743 / NCIMB 8052) GN=pgk PE=3 SV=1 [A6LR05] Score: 365.0	Clostridium	K00927	2.7.2.3		0	0	0	0	0	0	0.029876	0.0252406	0.0346096	0.0257145	0.0219378	0.0267932
PGK_STREM Phosphoglycerate kinase OS=Streptococcus equi subsp. zooepidemicus (strain MGCS10565) GN=pgk PE=3 SV=1	Firmicutes	K00927	2.7.2.3		0.0162558	0.0234599	0.0167363	0.0233121	0.0559597	0.0284036	0.104566	0.0851869	0.103829	0.0624495	0.0804388	0.107173
PGK_SHIDS Phosphoglycerate kinase OS=Shigella dysenteriae serotype 1 (strain Sd197) GN=pgk PE=3 SV=1	Enterobacteriaceae	K00927	2.7.2.3		0.0596044	0.0938394	0.0390514	0.111898	0.102593	0.0994125	0.278843	0.293422	0.298507	0.088164	0.117002	0.0650693
PGK_BUCAP Phosphoglycerate kinase OS=Buchnera aphidicola subsp. Schizaphis graminum (strain Sg) GN=pgk PE=3 SV=1	Gammaproteobacteria	K00927	2.7.2.3		0	0	0	0	0	0	0.029876	0.0347058	0.0302834	0.007347	0.00731261	0.0229656
PGK_PHOLL Phosphoglycerate kinase OS=Photorhabdus luminescens subsp. laumondii (strain DSM 15139 / CIP 105565 / TT01) GN=pgk PE=3 SV=1	Gammaproteobacteria	K00927	2.7.2.3		0.00541859	0.0234599	0	0.0372993	0.0326432	0.0284036	0.134442	0.104117	0.121133	0.0404085	0.0329068	0.0306208
PGK_MYCMS Phosphoglycerate kinase OS=Mycoplasma mycoides subsp. mycoides SC (strain PG1) GN=pgk PE=3 SV=1	Bacteria	K00927	2.7.2.3		0	0	0	0	0	0	0	0	0	0	0	0
PGK_PENCH Phosphoglycerate kinase OS=Penicillium chrysogenum GN=PGKA PE=3 SV=1	Eukaryota	-	2.7.2.3		0	0	0	0	0	0	0	0	0	0	0	0
PGKH_WHEAT Phosphoglycerate kinase, chloroplastic OS=Triticum aestivum PE=2 SV=1	Streptophyta	-	2.7.2.3		0	0	0	0	0	0	0	0	0	0	0	0
PGK_CONMG Phosphoglycerate kinase (Fragment) OS=Condylostoma magnum GN=PGK PE=3 SV=1	root	-	2.7.2.3		0	0	0	0	0	0	0	0	0	0	0	0
PGK_CHLMU Phosphoglycerate kinase OS=Chlamydia muridarum (strain MoPn / Nigg) GN=pgk PE=3 SV=1	root	K00927	2.7.2.3		0	0	0	0	0	0	0	0	0	0	0	0
PGK_CHLAB Phosphoglycerate kinase OS=Chlamydia abortus (strain DSM 27085 / S26/3) GN=pgk PE=3 SV=1	root	K00927	2.7.2.3		0	0	0	0	0	0	0	0	0	0	0	0
PGK_FINM2 Phosphoglycerate kinase OS=Finegoldia magna (strain ATCC 29328) GN=pgk PE=3 SV=1	root	K00927	2.7.2.3		0	0	0	0	0	0	0	0	0	0	0	0
PGK_TETPY Phosphoglycerate kinase (Fragment) OS=Tetrahymena pyriformis GN=PGK PE=3 SV=1	root	-	2.7.2.3		0	0	0	0	0	0	0	0	0	0	0	0
PGK_CAEEL Probable phosphoglycerate kinase OS=Caenorhabditis elegans GN=pgk-1 PE=3 SV=1	root	K00927	2.7.2.3		0	0	0	0	0	0	0	0	0	0	0	0
PGK_GLACH Phosphoglycerate kinase (Fragment) OS=Glaucoma chattoni GN=PGK PE=3 SV=1	root	-	2.7.2.3		0	0	0	0	0	0	0	0	0	0	0	0
PGK_WOLWR Phosphoglycerate kinase OS=Wolbachia sp. subsp. Drosophila simulans (strain wRi) GN=pgk PE=3 SV=1	root	K00927	2.7.2.3		0	0	0	0	0	0	0	0	0	0	0	0
MG: Aspartokinase 1 OS=Bacillus subtilis (strain 168) GN=dapG PE=3 SV=3 [Q04795] Score: 248.0	Bacillus subtilis subsp. subtilis str. 168	K00928	2.7.2.4		0	0	0	0	0	0	0	0	0.0043262	0.0036735	0	0
AK3_ECOLI Lysine-sensitive aspartokinase 3 OS=Escherichia coli (strain K12) GN=lysC PE=1 SV=2	Escherichia coli K-12	K00928	2.7.2.4		0	0.00469197	0	0.0512866	0	0	0	0	0	0	0	0
MG: Butyrate kinase OS=Clostridium perfringens (strain ATCC 13124 / DSM 756 / JCM 1290 / NCIMB 6125 / NCTC 8237 / Type A) GN=buk PE=3 SV=1 [Q0TMV4] Score: 524.0	Clostridium	K00929	2.7.2.7		0	0	0	0	0	0	0	0	0	0	0	0
BUK_CLOBB Probable butyrate kinase OS=Clostridium botulinum (strain Eklund 17B / Type B) GN=buk PE=3 SV=1	Firmicutes	K00929	2.7.2.7		0	0	0	0	0	0	0	0	0	0	0	0
BUK_LISMH Probable butyrate kinase OS=Listeria monocytogenes serotype 4a (strain HCC23) GN=buk PE=3 SV=1	Firmicutes	K00929	2.7.2.7		0	0	0	0	0	0	0	0	0	0	0	0
ARGB_ROSCS Acetylglutamate kinase OS=Roseiflexus castenholzii (strain DSM 13941 / HLO8) GN=argB PE=3 SV=1	Roseiflexus castenholzii DSM 13941	K00930	2.7.2.8		0	0	0	0	0	0	0	0	0	0	0	0
ARGB_SPHAL Acetylglutamate kinase OS=Sphingopyxis alaskensis (strain DSM 13593 / LMG 18877 / RB2256) GN=argB PE=3 SV=1	Sphingopyxis alaskensis RB2256	K00930	2.7.2.8		0	0	0	0	0	0	0	0	0	0	0	0
KCRU_CHICK Creatine kinase U-type, mitochondrial OS=Gallus gallus GN=CKMT1 PE=1 SV=1	Chordata	K00933	2.7.3.2		0	0	0.0111575	0	0	0	0	0	0	0	0	0
PT1_STRSL Phosphoenolpyruvate-protein phosphotransferase OS=Streptococcus salivarius GN=ptsI PE=3 SV=1	Streptococcaceae	-	2.7.3.9		0.00541859	0	0.0167363	0.00932484	0.00466331	0	0	0	0	0	0	0
PT1_LACLA Phosphoenolpyruvate-protein phosphotransferase OS=Lactococcus lactis subsp. lactis (strain IL1403) GN=ptsI PE=3 SV=1	Bacilli	-	2.7.3.9		0	0	0.0111575	0	0	0	0.00497934	0.00315507	0.0043262	0	0	0.0038276
PT1_ECOLI Phosphoenolpyruvate-protein phosphotransferase OS=Escherichia coli (strain K12) GN=ptsI PE=1 SV=1	Escherichia coli K-12	K08483	2.7.3.9		0	0	0	0	0	0	0.00995867	0.0126203	0.00865239	0	0	0
PYRH_METM6 Uridylate kinase OS=Methanococcus maripaludis (strain C6 / ATCC BAA-1332) GN=pyrH PE=3 SV=1	Methanococcus maripaludis C6	K09903	2.7.4.22		0	0	0	0	0	0	0	0	0	0	0	0
PYRH_FRASC Uridylate kinase OS=Frankia sp. (strain CcI3) GN=pyrH PE=3 SV=1	Frankia sp. CcI3	K09903	2.7.4.22		0	0	0	0	0	0	0	0	0	0	0	0
PYRH_STRSY Uridylate kinase OS=Streptococcus suis (strain 05ZYH33) GN=pyrH PE=3 SV=2	Streptococcus	K09903	2.7.4.22		0	0	0	0	0	0	0	0	0	0	0	0
PYRH_STRPQ Uridylate kinase OS=Streptococcus pyogenes serotype M3 (strain SSI-1) GN=pyrH PE=3 SV=1	Firmicutes	K09903	2.7.4.22		0	0	0	0	0	0	0	0	0.0043262	0	0	0
PYRH_SYNR3 Uridylate kinase OS=Synechococcus sp. (strain RCC307) GN=pyrH PE=3 SV=1	Bacteria	K09903	2.7.4.22		0	0	0	0	0	0	0	0	0.0043262	0	0	0
KCY_ECOSM Cytidylate kinase OS=Escherichia coli (strain SMS-3-5 / SECEC) GN=cmk PE=3 SV=1	Enterobacteriaceae	K00945	2.7.4.25		0	0	0	0	0	0	0.00995867	0.00631014	0.00865239	0.0036735	0.00731261	0
KCY_THEP1 Cytidylate kinase OS=Thermotoga petrophila (strain RKU-1 / ATCC BAA-488 / DSM 13995) GN=cmk PE=3 SV=1	Thermotoga	K00945	2.7.4.25		0	0	0	0	0	0	0	0	0	0	0	0
KAD_BREBN Adenylate kinase OS=Brevibacillus brevis (strain 47 / JCM 6285 / NBRC 100599) GN=adk PE=3 SV=1	Bacillales	K00939	2.7.4.3		0	0	0	0	0	0	0	0	0	0	0	0
KAD_STACA Adenylate kinase (Fragment) OS=Staphylococcus carnosus GN=adk PE=3 SV=1	Bacillales	-	2.7.4.3		0	0	0	0	0	0	0	0	0	0	0	0
KAD_STAAR Adenylate kinase OS=Staphylococcus aureus (strain MRSA252) GN=adk PE=3 SV=1	Bacillales	K00939	2.7.4.3		0	0	0	0	0	0	0	0	0	0	0	0
KAD_STRZT Adenylate kinase OS=Streptococcus pneumoniae (strain Taiwan19F-14) GN=adk PE=3 SV=1	Streptococcaceae	K00939	2.7.4.3		0	0	0	0	0	0	0	0	0	0	0	0
KAD_OCEIH Adenylate kinase OS=Oceanobacillus iheyensis (strain DSM 14371 / JCM 11309 / KCTC 3954 / HTE831) GN=adk PE=3 SV=1	Bacilli	K00939	2.7.4.3		0	0	0	0	0.00466331	0	0	0.00315507	0.0043262	0.0036735	0	0
KAD_LACCB Adenylate kinase OS=Lactobacillus casei (strain BL23) GN=adk PE=3 SV=1	Bacilli	K00939	2.7.4.3		0	0	0	0	0	0	0	0	0	0	0	0
KAD_METPB Adenylate kinase OS=Methylobacterium populi (strain ATCC BAA-705 / NCIMB 13946 / BJ001) GN=adk PE=3 SV=1	Rhizobiales	K00939	2.7.4.3		0	0	0	0	0	0	0	0	0	0	0	0
KAD_NITWN Adenylate kinase OS=Nitrobacter winogradskyi (strain Nb-255 / ATCC 25391) GN=adk PE=3 SV=1	Rhizobiales	K00939	2.7.4.3		0	0	0	0	0	0	0	0	0	0	0	0
KAD_SALEP Adenylate kinase OS=Salmonella enteritidis PT4 (strain P125109) GN=adk PE=3 SV=1	Enterobacteriaceae	K00939	2.7.4.3		0	0	0	0.00932484	0.00466331	0	0.0199173	0.0189304	0.0173048	0.0036735	0.0109689	0
KAD_LEPBJ Adenylate kinase OS=Leptospira borgpetersenii serovar Hardjo-bovis (strain JB197) GN=adk PE=3 SV=1	Leptospira borgpetersenii serovar Hardjo-bovis str. JB197	K00939	2.7.4.3		0	0	0	0	0	0	0.00497934	0	0	0	0	0
KAD_CORA7 Adenylate kinase OS=Corynebacterium aurimucosum (strain ATCC 700975 / DSM 44827 / CN-1) GN=adk PE=3 SV=1	Bacteria	K00939	2.7.4.3		0	0	0	0	0	0	0	0	0	0	0	0
KAD_ACIC1 Adenylate kinase OS=Acidothermus cellulolyticus (strain ATCC 43068 / 11B) GN=adk PE=3 SV=1	Bacteria	K00939	2.7.4.3		0	0	0	0	0	0	0	0	0	0	0	0
KAD1_CAEEL Adenylate kinase isoenzyme 1 OS=Caenorhabditis elegans GN=F38B2.4 PE=2 SV=1	Metazoa	-	2.7.4.3		0	0	0	0	0	0	0	0	0	0	0	0
KAD_ANADF Adenylate kinase OS=Anaeromyxobacter sp. (strain Fw109-5) GN=adk PE=3 SV=1	root	K00939	2.7.4.3		0	0	0	0	0	0	0	0	0	0	0	0
KAD_AGRFC Adenylate kinase OS=Agrobacterium fabrum (strain C58 / ATCC 33970) GN=adk PE=3 SV=1	root	K00939	2.7.4.3		0	0	0	0	0	0	0	0	0	0	0	0
KAD_METAC Adenylate kinase OS=Methanosarcina acetivorans (strain ATCC 35395 / DSM 2834 / JCM 12185 / C2A) GN=adk PE=3 SV=1	root	K00939	2.7.4.3		0	0	0	0	0	0	0	0	0	0	0	0
KAD_RHILO Adenylate kinase OS=Rhizobium loti (strain MAFF303099) GN=adk PE=3 SV=1	root	K00939	2.7.4.3		0	0	0	0	0	0	0	0	0	0	0	0
KAD_SINMW Adenylate kinase OS=Sinorhizobium medicae (strain WSM419) GN=adk PE=3 SV=1	root	K00939	2.7.4.3		0	0	0	0	0	0	0	0	0	0	0	0
KAD_THEM4 Adenylate kinase OS=Thermosipho melanesiensis (strain DSM 12029 / CIP 104789 / BI429) GN=adk PE=3 SV=1	root	K00939	2.7.4.3		0	0	0	0	0	0	0	0	0	0	0	0
KAD_MYCPN Adenylate kinase OS=Mycoplasma pneumoniae (strain ATCC 29342 / M129) GN=adk PE=3 SV=1	root	K00939	2.7.4.3		0	0	0	0	0	0	0	0	0	0	0	0
KAD_XYLFT Adenylate kinase OS=Xylella fastidiosa (strain Temecula1 / ATCC 700964) GN=adk PE=3 SV=1	root	-	2.7.4.3		0	0	0	0	0	0	0	0	0	0	0	0
KAD_ALTMD Adenylate kinase OS=Alteromonas mediterranea (strain DSM 17117 / CIP 110805 / LMG 28347 / Deep ecotype) GN=adk PE=3 SV=1	root	K00939	2.7.4.3		0	0	0	0	0	0	0	0	0	0	0	0
KAD1_HUMAN Adenylate kinase isoenzyme 1 OS=Homo sapiens GN=AK1 PE=1 SV=3	Metazoa	K00939	2.7.4.3 2.7.4.6		0	0	0	0	0	0	0	0	0	0	0	0
D2H129_AILME Putative uncharacterized protein (Fragment) OS=Ailuropoda melanoleuca GN=PANDA_003186 PE=3 SV=1	Metazoa	K00939	2.7.4.3 2.7.4.6		0	0	0	0	0	0	0	0	0	0	0	0
KAD5_MOUSE Adenylate kinase isoenzyme 5 OS=Mus musculus GN=Ak5 PE=1 SV=2	Metazoa	K00939	2.7.4.3 2.7.4.6		0	0	0	0	0	0	0	0	0	0	0	0
NDK_METMJ Nucleoside diphosphate kinase OS=Methanoculleus marisnigri (strain ATCC 35101 / DSM 1498 / JR1) GN=ndk PE=3 SV=1	Methanoculleus marisnigri JR1	K00940	2.7.4.6		0	0	0.00557877	0	0	0	0	0	0	0	0	0
NDK_RUBXD Nucleoside diphosphate kinase OS=Rubrobacter xylanophilus (strain DSM 9941 / NBRC 16129) GN=ndk PE=3 SV=1	Rubrobacter xylanophilus DSM 9941	K00940	2.7.4.6		0	0	0	0	0	0	0	0	0	0	0	0
NDK_STRU0 Nucleoside diphosphate kinase OS=Streptococcus uberis (strain ATCC BAA-854 / 0140J) GN=ndk PE=3 SV=1	Streptococcus uberis 0140J	K00940	2.7.4.6		0	0	0	0	0	0	0	0	0	0	0	0
NDK_CAPAN Nucleoside diphosphate kinase OS=Capsicum annuum PE=2 SV=1	Streptophyta	-	2.7.4.6		0	0	0	0	0	0	0	0	0	0	0	0
NDK1_SPIOL Nucleoside diphosphate kinase 1 OS=Spinacia oleracea GN=NDPK1 PE=2 SV=1	Streptophyta	-	2.7.4.6		0	0	0	0	0	0	0	0	0	0	0	0
NDK1_ARATH Nucleoside diphosphate kinase 1 OS=Arabidopsis thaliana GN=NDK1 PE=1 SV=1	Streptophyta	K00940	2.7.4.6		0	0	0	0	0	0	0	0	0	0	0	0
NDK3_ARATH Nucleoside diphosphate kinase III, chloroplastic/mitochondrial OS=Arabidopsis thaliana GN=NDPK3 PE=1 SV=1	root	K00940	2.7.4.6		0	0	0	0	0	0	0	0	0	0	0	0
NDKA_PONAB Nucleoside diphosphate kinase A OS=Pongo abelii GN=NME1 PE=2 SV=1	root	K00940	2.7.4.6		0	0	0	0	0	0	0	0	0	0	0	0
NDKB_RAT Nucleoside diphosphate kinase B OS=Rattus norvegicus GN=Nme2 PE=1 SV=1	root	K00940	2.7.4.6		0	0	0	0	0	0	0	0	0	0	0	0
NDK_PROMP Nucleoside diphosphate kinase OS=Prochlorococcus marinus subsp. pastoris (strain CCMP1986 / MED4) GN=ndk PE=3 SV=1	root	K00940	2.7.4.6		0	0	0	0	0	0	0	0	0	0	0	0
NDK4_ARATH Nucleoside diphosphate kinase IV, chloroplastic/mitochondrial OS=Arabidopsis thaliana GN=NDK4 PE=1 SV=2	root	K00940	2.7.4.6		0	0	0	0	0	0	0	0	0	0	0	0
NDKB_MACMG Nucleoside diphosphate kinase B (Fragments) OS=Macruronus magellanicus GN=nme2 PE=1 SV=1	root	-	2.7.4.6		0	0	0	0	0	0	0	0	0	0	0	0
NDKB_CANLF Nucleoside diphosphate kinase B OS=Canis lupus familiaris GN=NME2 PE=2 SV=1	root	K00940	2.7.4.6 2.7.13.3		0	0	0	0	0	0	0	0	0	0	0	0
KGUA_SYNJA Guanylate kinase OS=Synechococcus sp. (strain JA-3-3Ab) GN=gmk PE=3 SV=1	Synechococcus sp. JA-3-3Ab	K00942	2.7.4.8		0	0	0	0	0	0	0	0	0	0	0	0
KGUA_DEIGD Guanylate kinase OS=Deinococcus geothermalis (strain DSM 11300) GN=gmk PE=3 SV=1	Deinococcus geothermalis DSM 11300	K00942	2.7.4.8		0	0	0	0	0	0	0.00497934	0	0	0	0	0
KGUA_STRA1 Guanylate kinase OS=Streptococcus agalactiae serotype Ia (strain ATCC 27591 / A909 / CDC SS700) GN=gmk PE=3 SV=1	Streptococcaceae	K00942	2.7.4.8		0	0	0	0	0	0	0	0	0	0	0	0
KGUA_STRT2 Guanylate kinase OS=Streptococcus thermophilus (strain ATCC BAA-250 / LMG 18311) GN=gmk PE=3 SV=1	Streptococcaceae	K00942	2.7.4.8		0	0	0	0	0	0	0	0	0	0	0	0
KTHY_CHLFF Thymidylate kinase OS=Chlamydia felis (strain Fe/C-56) GN=tmk PE=3 SV=1	Chlamydophila felis Fe/C-56	K00943	2.7.4.9		0	0	0	0.00932484	0.00466331	0	0	0	0	0	0	0
KTHY_YEAST Thymidylate kinase OS=Saccharomyces cerevisiae (strain ATCC 204508 / S288c) GN=CDC8 PE=1 SV=2	Saccharomyces cerevisiae S288c	K00943	2.7.4.9		0	0	0	0	0	0	0	0	0	0	0	0
KPRS1_STRR6 Ribose-phosphate pyrophosphokinase 1 OS=Streptococcus pneumoniae (strain ATCC BAA-255 / R6) GN=prs1 PE=3 SV=1	Streptococcus pneumoniae	K00948	2.7.6.1		0	0	0	0	0	0	0	0	0	0	0	0
KPRS1_STRP1 Ribose-phosphate pyrophosphokinase 1 OS=Streptococcus pyogenes serotype M1 GN=prs1 PE=3 SV=1	Streptococcus pyogenes	K00948	2.7.6.1		0	0.0140759	0.00557877	0.00932484	0.00932662	0.00473393	0	0.00315507	0.0173048	0	0.00365631	0
KPRS2_STRMU Ribose-phosphate pyrophosphokinase 2 OS=Streptococcus mutans serotype c (strain ATCC 700610 / UA159) GN=prs2 PE=3 SV=1	Streptococcus	K00948	2.7.6.1		0	0	0	0	0	0	0	0	0	0	0	0
KPRS_VIBPA Ribose-phosphate pyrophosphokinase OS=Vibrio parahaemolyticus serotype O3:K6 (strain RIMD 2210633) GN=prs PE=3 SV=1	Gammaproteobacteria	K00948	2.7.6.1		0	0	0	0	0	0	0	0	0.0043262	0	0	0
KPRS_SHEON Ribose-phosphate pyrophosphokinase OS=Shewanella oneidensis (strain MR-1) GN=prs PE=3 SV=1	Gammaproteobacteria	K00948	2.7.6.1		0	0.00938394	0.00557877	0.00466242	0.00466331	0.00473393	0	0	0	0	0	0
KPRS_BLOFL Ribose-phosphate pyrophosphokinase OS=Blochmannia floridanus GN=prs PE=3 SV=1	Proteobacteria	K00948	2.7.6.1		0	0	0	0	0	0	0	0	0	0	0	0
KPRS_MARMM Ribose-phosphate pyrophosphokinase OS=Maricaulis maris (strain MCS10) GN=prs PE=3 SV=1	Proteobacteria	K00948	2.7.6.1		0	0	0	0	0	0	0	0	0	0	0	0
HPPK_STRP1 2-amino-4-hydroxy-6-hydroxymethyldihydropteridine pyrophosphokinase OS=Streptococcus pyogenes serotype M1 GN=folK PE=3 SV=1	Streptococcus pyogenes	K00950	2.7.6.3		0	0	0	0	0	0	0	0	0	0	0	0
MG: GTP pyrophosphokinase YjbM OS=Bacillus subtilis (strain 168) GN=yjbM PE=1 SV=1 [O31611] Score: 228.0	Bacillus subtilis subsp. subtilis str. 168	K07816	2.7.6.5		0	0	0	0	0	0	0	0	0	0.0036735	0.00365631	0
DNAG_METM6 DNA primase DnaG OS=Methanococcus maripaludis (strain C6 / ATCC BAA-1332) GN=dnaG PE=3 SV=1	Methanococcus maripaludis C6	-	2.7.7.-		0.00541859	0	0	0	0	0	0	0	0	0	0	0.0038276
PRIS_METBU DNA primase small subunit PriS OS=Methanococcoides burtonii (strain DSM 6242 / NBRC 107633 / OCM 468 / ACE-M) GN=priS PE=3 SV=1	root	K02683	2.7.7.-		0	0	0	0	0	0	0	0	0	0.0036735	0	0
VINT_BPMD2 Integrase OS=Mycobacterium phage D29 GN=33 PE=3 SV=2	Mycobacterium phage D29	-	2.7.7.- 3.1.-.-		0	0	0	0	0	0	0	0	0	0	0	0
PRIM_BPT7 DNA primase/helicase OS=Enterobacteria phage T7 GN=4 PE=1 SV=1	Enterobacteria phage T7	K17680	2.7.7.- 3.6.4.12		0	0	0	0	0	0	0.00497934	0	0	0	0	0
GAL7_HYPJE Galactose-1-phosphate uridylyltransferase OS=Hypocrea jecorina GN=gal7 PE=3 SV=1	Trichoderma reesei	-	2.7.7.12		0	0	0	0	0	0	0	0	0	0	0	0
GLD4_CAEEL Poly(A) RNA polymerase gld-4 OS=Caenorhabditis elegans GN=gld-4 PE=1 SV=1	Caenorhabditis elegans	K03514	2.7.7.19		0	0	0	0	0	0	0	0	0	0	0	0
MG: Bifunctional protein GlmU OS=Bacillus thuringiensis subsp. konkukian (strain 97-27) GN=glmU PE=3 SV=1 [Q6HPW8] Score: 675.0	Bacillales	K04042	2.7.7.23 2.3.1.157		0	0	0	0	0	0	0	0	0	0	0	0
GLMU_METCA Bifunctional protein GlmU OS=Methylococcus capsulatus (strain ATCC 33009 / NCIMB 11132 / Bath) GN=glmU PE=3 SV=1	Methylococcus capsulatus str. Bath	K04042	2.7.7.23 2.3.1.157		0	0	0	0	0	0	0	0	0	0.007347	0	0
MG: Glucose-1-phosphate thymidylyltransferase OS=Streptococcus mutans serotype c (strain ATCC 700610 / UA159) GN=rmlA PE=3 SV=1 [P95778] Score: 185.0	Streptococcus mutans UA159	K00973	2.7.7.24		0	0	0	0	0	0	0	0	0	0	0	0
COAD_LACF3 Phosphopantetheine adenylyltransferase OS=Lactobacillus fermentum (strain NBRC 3956 / LMG 18251) GN=coaD PE=3 SV=1	Lactobacillus fermentum IFO 3956	K00954	2.7.7.3		0	0	0.00557877	0	0	0	0	0	0	0	0	0
COAD_LACLS Phosphopantetheine adenylyltransferase OS=Lactococcus lactis subsp. cremoris (strain SK11) GN=coaD PE=3 SV=1	Lactococcus lactis	K00954	2.7.7.3		0.0108372	0.00938394	0.0111575	0	0.00466331	0.0142018	0	0.00315507	0.0043262	0.014694	0.00731261	0.0114828
KDSB_CHLCH 3-deoxy-manno-octulosonate cytidylyltransferase OS=Chlorobium chlorochromatii (strain CaD3) GN=kdsB PE=3 SV=1	Chlorobium chlorochromatii CaD3	K00979	2.7.7.38		0	0	0	0	0	0	0	0	0	0	0	0
KDSB_XANAC 3-deoxy-manno-octulosonate cytidylyltransferase OS=Xanthomonas axonopodis pv. citri (strain 306) GN=kdsB PE=3 SV=1	Xanthomonas axonopodis pv. citri str. 306	K00979	2.7.7.38		0	0	0	0	0	0	0	0	0	0	0	0
SAT_LYSSC Sulfate adenylyltransferase OS=Lysinibacillus sphaericus (strain C3-41) GN=sat PE=3 SV=1	Lysinibacillus sphaericus C3-41	K00958	2.7.7.4		0	0	0	0	0	0	0	0	0	0	0	0
SAT_DESDA Sulfate adenylyltransferase OS=Desulfovibrio desulfuricans (strain ATCC 27774 / DSM 6949) GN=sat PE=3 SV=1	root	K00958	2.7.7.4		0	0	0	0.00466242	0	0	0	0	0	0	0	0
SAT_ENTHI Sulfate adenylyltransferase OS=Entamoeba histolytica PE=3 SV=1	root	-	2.7.7.4		0	0	0	0.00466242	0	0	0	0	0	0	0	0
GLNE_RALSO Glutamate-ammonia-ligase adenylyltransferase OS=Ralstonia solanacearum (strain GMI1000) GN=glnE PE=3 SV=1	Ralstonia solanacearum GMI1000	K00982	2.7.7.42		0	0	0	0	0	0	0	0	0	0	0	0
GLNE_YERE8 Glutamate-ammonia-ligase adenylyltransferase OS=Yersinia enterocolitica serotype O:8 / biotype 1B (strain NCTC 13174 / 8081) GN=glnE PE=3 SV=1	Yersinia enterocolitica subsp. enterocolitica 8081	K00982	2.7.7.42		0	0	0	0	0	0	0	0.00315507	0.0043262	0.0036735	0.00365631	0
L_SBVBH RNA-directed RNA polymerase L OS=Bovine Schmallenberg virus (isolate Bovine/BH80/Germany/2011) GN=L PE=3 SV=1	Bovine Schmallenberg virus BH80/Germany/2011	-	2.7.7.48		0	0	0	0	0	0	0	0	0	0	0	0
RDRP_I00A0 RNA-directed RNA polymerase catalytic subunit OS=Influenza A virus (strain A/Duck/Hong Kong/2986.1/2000 H5N1 genotype C) GN=PB1 PE=3 SV=1	Influenza A virus (A/Duck/Hong Kong/2986.1/2000(H5N1))	-	2.7.7.48		0	0	0	0	0	0	0	0	0	0	0.00365631	0
TERT_RAT Telomerase reverse transcriptase OS=Rattus norvegicus GN=Tert PE=2 SV=1	Rattus norvegicus	K11126	2.7.7.49		0	0	0	0	0	0	0	0	0	0	0	0
GLND_PHEZH Bifunctional uridylyltransferase/uridylyl-removing enzyme OS=Phenylobacterium zucineum (strain HLK1) GN=glnD PE=3 SV=1	Phenylobacterium zucineum HLK1	K00990	2.7.7.59 3.1.4.-		0.00541859	0	0	0	0	0	0	0	0	0	0	0
GLND_BRADU Bifunctional uridylyltransferase/uridylyl-removing enzyme OS=Bradyrhizobium diazoefficiens (strain JCM 10833 / IAM 13628 / NBRC 14792 / USDA 110) GN=glnD PE=3 SV=2	Bradyrhizobiaceae	K00990	2.7.7.59 3.1.4.-		0	0	0	0	0	0	0	0	0	0	0	0
RPOC_RHOOB DNA-directed RNA polymerase subunit beta OS=Rhodococcus opacus (strain B4) GN=rpoC PE=3 SV=1	Nocardiaceae	K03046	2.7.7.6		0	0	0	0	0	0	0	0	0	0	0	0
RPOB_PROAC DNA-directed RNA polymerase subunit beta OS=Propionibacterium acnes (strain KPA171202 / DSM 16379) GN=rpoB PE=3 SV=1	Propionibacterium acnes KPA171202	K03043	2.7.7.6		0.00541859	0	0	0	0	0	0	0	0	0	0	0
RPOC_AQUAE DNA-directed RNA polymerase subunit beta OS=Aquifex aeolicus (strain VF5) GN=rpoC PE=3 SV=1	Aquifex aeolicus VF5	K03046	2.7.7.6		0	0	0	0	0	0	0	0	0.0043262	0	0	0
RPOC_CHLPB DNA-directed RNA polymerase subunit beta OS=Chlorobium phaeobacteroides (strain BS1) GN=rpoC PE=3 SV=1	Chlorobium phaeobacteroides BS1	K03046	2.7.7.6		0	0	0	0	0	0	0	0	0	0	0	0
RPOC_THET8 DNA-directed RNA polymerase subunit beta OS=Thermus thermophilus (strain HB8 / ATCC 27634 / DSM 579) GN=rpoC PE=1 SV=1	Thermus thermophilus HB8	K03046	2.7.7.6		0	0	0	0	0	0	0	0	0	0	0	0
RPOZ_BACC2 DNA-directed RNA polymerase subunit omega OS=Bacillus cereus (strain G9842) GN=rpoZ PE=3 SV=1	Bacillus cereus G9842	K03060	2.7.7.6		0	0	0	0	0.00466331	0	0	0	0	0	0	0
RPOC_LACBA DNA-directed RNA polymerase subunit beta OS=Lactobacillus brevis (strain ATCC 367 / JCM 1170) GN=rpoC PE=3 SV=1	Lactobacillus brevis ATCC 367	K03046	2.7.7.6		0	0	0	0.00466242	0	0	0	0	0	0	0	0
RPOB_LACLA DNA-directed RNA polymerase subunit beta OS=Lactococcus lactis subsp. lactis (strain IL1403) GN=rpoB PE=3 SV=1	Streptococcaceae	K03043	2.7.7.6		0	0.00469197	0	0	0	0	0	0	0	0	0	0
RPOB_STRT2 DNA-directed RNA polymerase subunit beta OS=Streptococcus thermophilus (strain ATCC BAA-250 / LMG 18311) GN=rpoB PE=3 SV=1	Streptococcaceae	K03043	2.7.7.6		0	0	0	0	0	0	0	0	0	0	0	0
MG: DNA-directed RNA polymerase subunit beta OS=Clostridium perfringens (strain 13 / Type A) GN=rpoB PE=3 SV=1 [P0C2E7] Score: 565.0	Clostridium	K03043	2.7.7.6		0	0	0	0	0	0	0.00497934	0	0.0043262	0	0	0
RPOA_ALKMQ DNA-directed RNA polymerase subunit alpha OS=Alkaliphilus metalliredigens (strain QYMF) GN=rpoA PE=3 SV=1	Firmicutes	K03040	2.7.7.6		0	0	0	0	0	0	0	0	0	0	0	0
RPOA_BACHD DNA-directed RNA polymerase subunit alpha OS=Bacillus halodurans (strain ATCC BAA-125 / DSM 18197 / FERM 7344 / JCM 9153 / C-125) GN=rpoA PE=3 SV=1	Firmicutes	K03040	2.7.7.6		0	0	0	0	0	0	0	0	0	0	0	0
RPOA_STRTD DNA-directed RNA polymerase subunit alpha OS=Streptococcus thermophilus (strain ATCC BAA-491 / LMD-9) GN=rpoA PE=3 SV=1	Firmicutes	K03040	2.7.7.6		0	0	0	0	0.00466331	0	0.0497934	0.0567913	0.0519143	0.0110205	0.0109689	0.0306208
RPOB_FUSNN DNA-directed RNA polymerase subunit beta OS=Fusobacterium nucleatum subsp. nucleatum (strain ATCC 25586 / CIP 101130 / JCM 8532 / LMG 13131) GN=rpoB PE=3 SV=1	Fusobacterium nucleatum subsp. nucleatum ATCC 25586	K03043	2.7.7.6		0	0	0	0	0	0	0.00497934	0	0	0	0	0
RPOB_BRUSU DNA-directed RNA polymerase subunit beta OS=Brucella suis biovar 1 (strain 1330) GN=rpoB PE=3 SV=1	Brucella	K03043	2.7.7.6		0	0.0140759	0	0	0	0	0	0	0	0.0110205	0.0109689	0
RPOB_BORA1 DNA-directed RNA polymerase subunit beta OS=Bordetella avium (strain 197N) GN=rpoB PE=3 SV=2	Bordetella avium 197N	K03043	2.7.7.6		0	0	0	0	0	0	0	0	0	0	0	0
RPOC_POLSJ DNA-directed RNA polymerase subunit beta OS=Polaromonas sp. (strain JS666 / ATCC BAA-500) GN=rpoC PE=3 SV=1	Comamonadaceae	K03046	2.7.7.6		0	0	0	0	0	0	0	0	0	0	0	0
RPOB_SULNB DNA-directed RNA polymerase subunit beta OS=Sulfurovum sp. (strain NBC37-1) GN=rpoB PE=3 SV=1	Sulfurovum sp. NBC37-1	K03043	2.7.7.6		0	0	0	0	0	0	0	0	0	0.0036735	0	0
RPOC_CARRP DNA-directed RNA polymerase subunit beta OS=Carsonella ruddii (strain PV) GN=rpoC PE=3 SV=1	Candidatus Carsonella ruddii PV	K03046	2.7.7.6		0	0	0	0	0	0	0	0	0	0	0	0
RPOA_BUCBP DNA-directed RNA polymerase subunit alpha OS=Buchnera aphidicola subsp. Baizongia pistaciae (strain Bp) GN=rpoA PE=3 SV=1	Gammaproteobacteria	K03040	2.7.7.6		0	0	0	0.00466242	0.00466331	0.00473393	0.0348554	0.0378609	0.0129786	0.007347	0.00731261	0
RPOA_YERPS DNA-directed RNA polymerase subunit alpha OS=Yersinia pseudotuberculosis serotype I (strain IP32953) GN=rpoA PE=1 SV=1	Gammaproteobacteria	K03040	2.7.7.6		0	0	0	0.00466242	0.00932662	0.00473393	0.07469	0.0757217	0.0475881	0.022041	0.0182815	0
RPOA_PSEAB DNA-directed RNA polymerase subunit alpha OS=Pseudomonas aeruginosa (strain UCBPP-PA14) GN=rpoA PE=3 SV=1	Gammaproteobacteria	-	2.7.7.6		0	0	0	0	0	0	0.00497934	0	0.0043262	0	0	0
RPOB_MYCCT DNA-directed RNA polymerase subunit beta OS=Mycoplasma capricolum subsp. capricolum (strain California kid / ATCC 27343 / NCTC 10154) GN=rpoB PE=3 SV=1	Mycoplasma capricolum subsp. capricolum ATCC 27343	K03043	2.7.7.6		0	0	0	0	0	0	0	0	0	0	0	0
RPOB_UREU1 DNA-directed RNA polymerase subunit beta OS=Ureaplasma urealyticum serovar 10 (strain ATCC 33699 / Western) GN=rpoB PE=3 SV=1	Ureaplasma	K03043	2.7.7.6		0.0108372	0.0234599	0.0111575	0.0186497	0.00932662	0.00946786	0	0	0	0	0	0
RPOB_ALKOO DNA-directed RNA polymerase subunit beta OS=Alkaliphilus oremlandii (strain OhILAs) GN=rpoB PE=3 SV=1	Bacteria	K03043	2.7.7.6		0	0	0	0	0	0	0	0.00315507	0	0.0110205	0	0
RPOBC_WOLTR Bifunctional DNA-directed RNA polymerase subunit beta-beta OS=Wolbachia sp. subsp. Brugia malayi (strain TRS) GN=rpoBC PE=3 SV=1	Bacteria	K13797	2.7.7.6		0	0.0140759	0	0	0	0	0	0	0	0.0110205	0.0146252	0
RPOB_STRCO DNA-directed RNA polymerase subunit beta OS=Streptomyces coelicolor (strain ATCC BAA-471 / A3(2) / M145) GN=rpoB PE=1 SV=1	Bacteria	K03043	2.7.7.6		0	0.0140759	0	0	0	0	0	0.00315507	0	0.0110205	0.0109689	0
RPOB_PHEZH DNA-directed RNA polymerase subunit beta OS=Phenylobacterium zucineum (strain HLK1) GN=rpoB PE=3 SV=1	Bacteria	K03043	2.7.7.6		0	0.0140759	0	0	0	0	0	0	0	0	0	0
RPOB_ANAPZ DNA-directed RNA polymerase subunit beta OS=Anaplasma phagocytophilum (strain HZ) GN=rpoB PE=3 SV=1	Bacteria	K03043	2.7.7.6		0	0.0140759	0	0	0	0	0	0	0	0	0	0
RPC1_DEBHA DNA-directed RNA polymerase III subunit RPC1 OS=Debaryomyces hansenii (strain ATCC 36239 / CBS 767 / JCM 1990 / NBRC 0083 / IGC 2968) GN=RPC1 PE=3 SV=2	Debaryomyces hansenii CBS767	K03018	2.7.7.6		0	0	0	0	0	0	0	0	0	0	0	0
D2I0I0_AILME DNA-directed RNA polymerase subunit (Fragment) OS=Ailuropoda melanoleuca GN=PANDA_018669 PE=3 SV=1	Ailuropoda melanoleuca	-	2.7.7.6		0	0.00469197	0	0	0	0	0	0	0	0	0	0
G1LGX9_AILME DNA-directed RNA polymerase subunit OS=Ailuropoda melanoleuca GN=POLR1A PE=3 SV=1	Ailuropoda melanoleuca	-	2.7.7.6		0	0.00469197	0	0	0	0	0	0	0	0	0	0
RPOC1_PORPU DNA-directed RNA polymerase subunit beta OS=Porphyra purpurea GN=rpoC1 PE=3 SV=1	Porphyra purpurea	-	2.7.7.6		0	0	0	0.00466242	0	0	0	0	0	0	0	0
RPOC2_ACUOB DNA-directed RNA polymerase subunit beta OS=Acutodesmus obliquus GN=rpoC2 PE=3 SV=1	Acutodesmus obliquus	-	2.7.7.6		0	0	0	0	0	0	0	0	0	0	0	0
RPOC2_MARPO DNA-directed RNA polymerase subunit beta OS=Marchantia polymorpha GN=rpoC2 PE=3 SV=1	Marchantia polymorpha	-	2.7.7.6		0	0	0	0	0	0	0	0	0	0	0.00365631	0
ISPD_SHEAM 2-C-methyl-D-erythritol 4-phosphate cytidylyltransferase OS=Shewanella amazonensis (strain ATCC BAA-1098 / SB2B) GN=ispD PE=3 SV=1	Shewanella amazonensis SB2B	K00991	2.7.7.60		0	0	0	0	0	0	0	0	0	0	0	0
USP_ORYSI UDP-sugar pyrophosphorylase OS=Oryza sativa subsp. indica GN=USP PE=3 SV=2	Oryza sativa Indica Group	-	2.7.7.64		0	0	0	0	0	0	0	0	0	0	0	0
COFC_MYCLB 2-phospho-L-lactate guanylyltransferase OS=Mycobacterium leprae (strain Br4923) GN=cofC PE=3 SV=1	Mycobacterium leprae Br4923	K14941	2.7.7.68		0.00541859	0.00469197	0	0	0	0	0	0	0	0	0	0
COFC_OLICO 2-phospho-L-lactate guanylyltransferase OS=Oligotropha carboxidovorans (strain ATCC 49405 / DSM 1227 / OM5) GN=cofC PE=3 SV=1	Oligotropha carboxidovorans OM5	K14941	2.7.7.68		0	0	0	0	0	0	0	0	0.0043262	0	0	0
DPO3A_BACHD DNA polymerase III subunit alpha OS=Bacillus halodurans (strain ATCC BAA-125 / DSM 18197 / FERM 7344 / JCM 9153 / C-125) GN=dnaE PE=3 SV=1	Bacillus halodurans C-125	K02337	2.7.7.7		0	0	0	0	0	0	0	0	0	0	0	0
DPO3_STAA8 DNA polymerase III PolC-type OS=Staphylococcus aureus (strain NCTC 8325) GN=polC PE=3 SV=1	Staphylococcus aureus	-	2.7.7.7		0	0	0	0	0	0	0	0.00315507	0.0043262	0	0.00365631	0
DPO3_STRSV DNA polymerase III PolC-type OS=Streptococcus sanguinis (strain SK36) GN=polC PE=3 SV=1	Streptococcus sanguinis SK36	K03763	2.7.7.7		0	0	0	0	0	0	0	0	0	0	0	0
MG: DNA polymerase III PolC-type OS=Caldanaerobacter subterraneus subsp. tengcongensis (strain DSM 15242 / JCM 11007 / NBRC 100824 / MB4) GN=polC PE=3 SV=1 [Q8RA32] Score: 102.0	Thermoanaerobacter tengcongensis MB4	K03763	2.7.7.7		0	0	0	0	0.00466331	0	0	0	0	0	0	0
DNAE2_BRASO Error-prone DNA polymerase OS=Bradyrhizobium sp. (strain ORS278) GN=dnaE2 PE=3 SV=1	Bradyrhizobium sp. ORS 278	K14162	2.7.7.7		0	0	0	0	0	0	0	0	0	0	0	0
DPO4_MARHV DNA polymerase IV OS=Marinobacter hydrocarbonoclasticus (strain ATCC 700491 / DSM 11845 / VT8) GN=dinB PE=3 SV=1	Marinobacter aquaeolei VT8	K02346	2.7.7.7		0	0	0	0	0	0	0	0	0	0	0.00365631	0
DNAE2_ALKEH Error-prone DNA polymerase OS=Alkalilimnicola ehrlichii (strain ATCC BAA-1101 / DSM 17681 / MLHE-1) GN=dnaE2 PE=3 SV=1	Alkalilimnicola ehrlichii MLHE-1	K14162	2.7.7.7		0	0.00469197	0.0111575	0	0	0	0	0	0	0	0	0
DNAE2_PSEA7 Error-prone DNA polymerase OS=Pseudomonas aeruginosa (strain PA7) GN=dnaE2 PE=3 SV=1	Pseudomonas aeruginosa PA7	K14162	2.7.7.7		0	0	0	0	0	0	0	0	0.0043262	0	0	0
DPB2_KLULA DNA polymerase epsilon subunit B OS=Kluyveromyces lactis (strain ATCC 8585 / CBS 2359 / DSM 70799 / NBRC 1267 / NRRL Y-1140 / WM37) GN=DPB2 PE=3 SV=1	Kluyveromyces lactis NRRL Y-1140	K02325	2.7.7.7		0	0	0	0	0	0	0	0	0	0	0	0
DPOLA_TRYBB DNA polymerase alpha catalytic subunit OS=Trypanosoma brucei brucei PE=3 SV=1	Trypanosoma brucei brucei	-	2.7.7.7		0	0.0140759	0	0	0	0	0	0	0	0	0	0
DPOD1_ORYSJ DNA polymerase delta catalytic subunit OS=Oryza sativa subsp. japonica GN=POLD1 PE=2 SV=1	Oryza sativa Japonica Group	K02327	2.7.7.7		0	0	0	0	0.00466331	0	0	0	0	0	0	0
DPOLQ_DROME DNA polymerase theta OS=Drosophila melanogaster GN=mus308 PE=1 SV=1	root	K02349	2.7.7.7		0	0	0	0	0	0	0	0	0.0043262	0.007347	0	0
DPOL_VACCA DNA polymerase OS=Vaccinia virus (strain Ankara) GN=POL PE=3 SV=1	Vaccinia virus	-	2.7.7.7 3.1.11.-		0	0	0	0	0	0	0	0	0	0	0	0
CCA_PSYIN Multifunctional CCA protein OS=Psychromonas ingrahamii (strain 37) GN=cca PE=3 SV=1	Psychromonas ingrahamii 37	K00974	2.7.7.72 3.1.3.- 3.1.4.- 3.1.3.-		0	0.00469197	0	0	0	0	0	0	0	0	0	0
PNP_HYDS0 Polyribonucleotide nucleotidyltransferase OS=Hydrogenobaculum sp. (strain Y04AAS1) GN=pnp PE=3 SV=1	Hydrogenobaculum sp. Y04AAS1	K00962	2.7.7.8		0	0	0	0	0	0	0	0	0	0	0	0.0038276
PNP_CHLL7 Polyribonucleotide nucleotidyltransferase OS=Chlorobium luteolum (strain DSM 273 / 2530) GN=pnp PE=3 SV=1	Chlorobiaceae	K00962	2.7.7.8		0	0	0	0	0	0	0	0	0	0	0.00365631	0
PNP_STREM Polyribonucleotide nucleotidyltransferase OS=Streptococcus equi subsp. zooepidemicus (strain MGCS10565) GN=pnp PE=3 SV=1	Streptococcus	K00962	2.7.7.8		0	0	0	0	0	0	0	0	0	0	0	0
PNP_STRZT Polyribonucleotide nucleotidyltransferase OS=Streptococcus pneumoniae (strain Taiwan19F-14) GN=pnp PE=3 SV=1	Streptococcus	K00962	2.7.7.8		0	0	0	0	0	0	0	0	0	0	0	0
PNP_METPB Polyribonucleotide nucleotidyltransferase OS=Methylobacterium populi (strain ATCC BAA-705 / NCIMB 13946 / BJ001) GN=pnp PE=3 SV=1	Methylobacterium populi BJ001	K00962	2.7.7.8		0	0	0	0	0	0	0	0	0	0.0036735	0	0
PNP_LAWIP Polyribonucleotide nucleotidyltransferase OS=Lawsonia intracellularis (strain PHE/MN1-00) GN=pnp PE=3 SV=1	Lawsonia intracellularis PHE/MN1-00	K00962	2.7.7.8		0	0	0	0	0	0	0	0	0	0	0	0
PNP_HAEIN Polyribonucleotide nucleotidyltransferase OS=Haemophilus influenzae (strain ATCC 51907 / DSM 11121 / KW20 / Rd) GN=pnp PE=3 SV=1	Haemophilus influenzae Rd KW20	K00962	2.7.7.8		0	0.00469197	0	0.00466242	0	0	0.00497934	0.00631014	0	0	0.00365631	0
PNP_VIBCM Polyribonucleotide nucleotidyltransferase OS=Vibrio cholerae serotype O1 (strain M66-2) GN=pnp PE=3 SV=1	Gammaproteobacteria	K00962	2.7.7.8		0	0	0	0	0	0	0.00497934	0	0	0	0	0
PNP_ECOHS Polyribonucleotide nucleotidyltransferase OS=Escherichia coli O9:H4 (strain HS) GN=pnp PE=3 SV=1	Gammaproteobacteria	K00962	2.7.7.8		0	0	0	0.00932484	0.00466331	0.00473393	0.00497934	0	0	0	0	0
PNP_BRAHW Polyribonucleotide nucleotidyltransferase OS=Brachyspira hyodysenteriae (strain ATCC 49526 / WA1) GN=pnp PE=3 SV=1	Brachyspira hyodysenteriae WA1	K00962	2.7.7.8		0	0	0	0	0	0	0.00497934	0.00315507	0.0346096	0.022041	0	0
PNP_PHYMT Polyribonucleotide nucleotidyltransferase OS=Phytoplasma mali (strain AT) GN=pnp PE=3 SV=1	Candidatus Phytoplasma mali AT	K00962	2.7.7.8		0	0	0	0	0	0	0	0	0	0	0	0
PNP_CLOB8 Polyribonucleotide nucleotidyltransferase OS=Clostridium beijerinckii (strain ATCC 51743 / NCIMB 8052) GN=pnp PE=3 SV=1	Bacteria	K00962	2.7.7.8		0	0	0	0	0	0	0.00497934	0.00315507	0.00865239	0	0.00365631	0
MOCS3_DROSE Adenylyltransferase and sulfurtransferase MOCS3 OS=Drosophila sechellia GN=GM17034 PE=3 SV=1	Drosophila sechellia	K11996	2.7.7.80 2.8.1.11		0	0	0	0	0	0	0	0	0	0	0	0
MOCS3_MOUSE Adenylyltransferase and sulfurtransferase MOCS3 OS=Mus musculus GN=Mocs3 PE=1 SV=1	Mus musculus	K11996	2.7.7.80 2.8.1.11		0	0	0	0.00466242	0	0	0	0	0	0	0	0
CGAS_HUMAN Cyclic GMP-AMP synthase OS=Homo sapiens GN=MB21D1 PE=1 SV=2	Homo sapiens	K17834	2.7.7.86		0	0	0	0	0	0	0	0	0	0	0	0.0038276
SUA5_SULTO Threonylcarbamoyl-AMP synthase OS=Sulfolobus tokodaii (strain DSM 16993 / JCM 10545 / NBRC 100140 / 7) GN=sua5 PE=1 SV=1	Sulfolobus tokodaii str. 7	K07566	2.7.7.87		0	0	0	0	0	0	0	0	0	0	0	0
TSAC_SHEB9 Threonylcarbamoyl-AMP synthase OS=Shewanella baltica (strain OS195) GN=tsaC PE=3 SV=1	Shewanella baltica OS195	K07566	2.7.7.87		0	0	0	0	0	0	0	0.00315507	0	0	0	0
CAP4C_STRPN UTP--glucose-1-phosphate uridylyltransferase OS=Streptococcus pneumoniae serotype 4 (strain ATCC BAA-334 / TIGR4) GN=cap4C PE=3 SV=1	Bacilli	K00963	2.7.7.9		0	0	0	0	0	0	0	0	0	0	0	0
GALU_MYCPN UTP--glucose-1-phosphate uridylyltransferase OS=Mycoplasma pneumoniae (strain ATCC 29342 / M129) GN=galU PE=3 SV=1	Bacteria	K00963	2.7.7.9		0	0	0	0	0	0	0	0	0	0	0	0
YNGB_BACSU Probable UTP--glucose-1-phosphate uridylyltransferase YngB OS=Bacillus subtilis (strain 168) GN=yngB PE=3 SV=1	Bacteria	-	2.7.7.9		0	0	0	0	0	0	0	0	0	0	0	0
UGPA_HORVU UTP--glucose-1-phosphate uridylyltransferase OS=Hordeum vulgare PE=2 SV=1	Streptophyta	-	2.7.7.9		0	0	0	0	0	0	0	0	0	0	0	0
UGPA_SOLTU UTP--glucose-1-phosphate uridylyltransferase OS=Solanum tuberosum PE=1 SV=3	Streptophyta	K00963	2.7.7.9		0	0	0	0	0	0	0	0	0	0	0	0
MG: Lipoteichoic acid synthase OS=Staphylococcus epidermidis (strain ATCC 12228) GN=ltaS PE=3 SV=1 [Q8CQ10] Score: 204.0	Staphylococcus epidermidis ATCC 12228	K19005	2.7.8.-		0	0	0	0	0	0	0	0.00315507	0	0	0	0
MRAY_AGRVS Phospho-N-acetylmuramoyl-pentapeptide-transferase OS=Agrobacterium vitis (strain S4 / ATCC BAA-846) GN=mraY PE=3 SV=1	Agrobacterium vitis S4	K01000	2.7.8.13		0.00541859	0	0	0.00466242	0	0.00473393	0	0	0	0	0.00365631	0
GPT_SCHPO UDP-N-acetylglucosamine--dolichyl-phosphate N-acetylglucosaminephosphotransferase OS=Schizosaccharomyces pombe (strain 972 / ATCC 24843) GN=gpt2 PE=3 SV=1	Schizosaccharomyces pombe 972h-	K01001	2.7.8.15		0	0	0	0	0	0	0	0	0	0	0	0.0038276
COBS_HALLT Adenosylcobinamide-GDP ribazoletransferase OS=Halorubrum lacusprofundi (strain ATCC 49239 / DSM 5036 / JCM 8891 / ACAM 34) GN=cobS PE=3 SV=1	Halorubrum lacusprofundi ATCC 49239	K02233	2.7.8.26		0	0	0	0	0	0	0	0	0.0043262	0	0	0
COBS_RHOFT Adenosylcobinamide-GDP ribazoletransferase OS=Rhodoferax ferrireducens (strain ATCC BAA-621 / DSM 15236 / T118) GN=cobS PE=3 SV=1	Rhodoferax ferrireducens T118	K02233	2.7.8.26		0	0	0	0	0	0	0	0	0	0	0	0
ACPS_STRMU Holo-[acyl-carrier-protein] synthase OS=Streptococcus mutans serotype c (strain ATCC 700610 / UA159) GN=acpS PE=3 SV=1	Streptococcus mutans UA159	K00997	2.7.8.7		0	0.00469197	0	0	0	0	0	0	0	0	0	0
ACPS_DESRM Holo-[acyl-carrier-protein] synthase OS=Desulfotomaculum reducens (strain MI-1) GN=acpS PE=3 SV=1	Desulfotomaculum reducens MI-1	K00997	2.7.8.7		0	0.00469197	0	0	0	0	0	0	0	0	0	0
ACPS_AGRFC Holo-[acyl-carrier-protein] synthase OS=Agrobacterium fabrum (strain C58 / ATCC 33970) GN=acpS PE=3 SV=1	Agrobacterium fabrum str. C58	K00997	2.7.8.7		0	0	0	0	0	0	0	0	0	0	0	0
MG: Pyruvate, phosphate dikinase OS=Clostridium symbiosum GN=ppdK PE=1 SV=5 [P22983] Score: 258.0	Clostridium	-	2.7.9.1		0	0	0	0	0	0	0	0	0	0	0	0
MG: Pyruvate, phosphate dikinase 2 OS=Oryza sativa subsp. japonica GN=PPDK2 PE=3 SV=1 [Q75KR1] Score: 966.0	root	K01006	2.7.9.1		0	0	0	0	0	0	0.00497934	0	0	0	0	0
YNJE_ECOLI Thiosulfate sulfurtransferase YnjE OS=Escherichia coli (strain K12) GN=ynjE PE=1 SV=2	Escherichia coli K-12	K01011	2.8.1.1		0	0	0	0	0	0	0	0	0.0043262	0	0	0
THIG_MYCLB Thiazole synthase OS=Mycobacterium leprae (strain Br4923) GN=thiG PE=3 SV=1	Mycobacterium	K03149	2.8.1.10		0	0	0	0	0	0	0	0.00315507	0	0	0	0
THIG_PARDP Thiazole synthase OS=Paracoccus denitrificans (strain Pd 1222) GN=thiG PE=3 SV=1	Paracoccus denitrificans PD1222	K03149	2.8.1.10		0.00541859	0	0	0	0	0	0	0	0	0	0	0
THIG_GEOBB Thiazole synthase OS=Geobacter bemidjiensis (strain Bem / ATCC BAA-1014 / DSM 16622) GN=thiG PE=3 SV=1	Geobacter bemidjiensis Bem	K03149	2.8.1.10		0	0	0	0	0	0	0	0	0.0043262	0	0	0
MNMA_PSEPF tRNA-specific 2-thiouridylase MnmA OS=Pseudomonas fluorescens (strain Pf0-1) GN=mnmA PE=3 SV=1	Pseudomonas fluorescens Pf0-1	K00566	2.8.1.13		0	0	0	0	0	0	0	0	0	0	0	0
THTM_ECO57 3-mercaptopyruvate sulfurtransferase OS=Escherichia coli O157:H7 GN=sseA PE=3 SV=2	Escherichia coli O157:H7	K01011	2.8.1.2		0	0	0	0	0	0	0	0	0	0	0	0
THII_LISMC Probable tRNA sulfurtransferase OS=Listeria monocytogenes serotype 4b (strain CLIP80459) GN=thiI PE=3 SV=1	Listeria monocytogenes	K03151	2.8.1.4		0	0	0	0	0	0	0	0	0	0	0	0
BIOB_PARPJ Biotin synthase OS=Paraburkholderia phytofirmans (strain DSM 17436 / LMG 22146 / PsJN) GN=bioB PE=3 SV=1	Burkholderia phytofirmans PsJN	K01012	2.8.1.6		0	0	0	0	0	0	0	0	0	0	0	0
MG: Cysteine desulfurase SufS OS=Bacillus subtilis (strain 168) GN=sufS PE=1 SV=1 [O32164] Score: 533.0	Bacillus subtilis subsp. subtilis str. 168	K11717	2.8.1.7		0	0	0	0	0	0	0	0	0	0	0	0
CSD_STAEQ Probable cysteine desulfurase OS=Staphylococcus epidermidis (strain ATCC 35984 / RP62A) GN=csd PE=3 SV=1	Staphylococcus epidermidis	K11717	2.8.1.7		0	0	0	0	0.00466331	0	0	0	0	0	0	0
MG: Cysteine desulfurase IscS OS=Clostridium botulinum (strain Hall / ATCC 3502 / NCTC 13319 / Type A) GN=iscS PE=3 SV=1 [A5I4Z9] Score: 340.0	Clostridium botulinum	K04487	2.8.1.7		0	0	0	0	0	0	0.00497934	0.00315507	0.0043262	0	0.00365631	0.0038276
NFS1_YEAST Cysteine desulfurase, mitochondrial OS=Saccharomyces cerevisiae (strain ATCC 204508 / S288c) GN=NFS1 PE=1 SV=2	Saccharomyces cerevisiae S288c	K04487	2.8.1.7		0	0	0	0	0	0	0	0	0	0	0	0
LIPA_SHEHH Lipoyl synthase OS=Shewanella halifaxensis (strain HAW-EB4) GN=lipA PE=3 SV=1	Shewanella halifaxensis HAW-EB4	K03644	2.8.1.8		0	0	0	0	0	0	0	0	0	0	0	0
CAT2_CLOK5 4-hydroxybutyrate coenzyme A transferase OS=Clostridium kluyveri (strain ATCC 8527 / DSM 555 / NCIMB 10680) GN=cat2 PE=3 SV=3	Clostridium kluyveri DSM 555	K18122	2.8.3.-		0.00541859	0	0	0	0	0	0	0	0	0	0	0
SCO2A_RAT Succinyl-CoA:3-ketoacid coenzyme A transferase 2A, mitochondrial OS=Rattus norvegicus GN=Oxct2a PE=1 SV=1	Rattus norvegicus	K01027	2.8.3.5		0	0	0	0	0	0	0	0	0	0	0	0
MCRB_METVO Methyl-coenzyme M reductase subunit beta OS=Methanococcus voltae GN=mcrB PE=4 SV=1	Methanococcus	-	2.8.4.1		0	0	0	0	0	0	0	0	0	0	0	0
MIAB_STRGG tRNA-2-methylthio-N(6)-dimethylallyladenosine synthase OS=Streptomyces griseus subsp. griseus (strain JCM 4626 / NBRC 13350) GN=miaB PE=3 SV=1	Streptomyces griseus subsp. griseus NBRC 13350	K06168	2.8.4.3		0	0	0	0	0	0	0	0	0	0	0.00365631	0
MIAB_METFK tRNA-2-methylthio-N(6)-dimethylallyladenosine synthase OS=Methylobacillus flagellatus (strain KT / ATCC 51484 / DSM 6875) GN=miaB PE=3 SV=1	Methylobacillus flagellatus KT	K06168	2.8.4.3		0	0	0	0	0	0	0	0	0	0	0.00365631	0
MIAB_CAMFF tRNA-2-methylthio-N(6)-dimethylallyladenosine synthase OS=Campylobacter fetus subsp. fetus (strain 82-40) GN=miaB PE=3 SV=1	Campylobacter fetus subsp. fetus 82-40	K06168	2.8.4.3		0	0	0	0	0	0	0	0	0	0	0	0
RIMO_MICAN Ribosomal protein S12 methylthiotransferase RimO OS=Microcystis aeruginosa (strain NIES-843) GN=rimO PE=3 SV=1	Microcystis aeruginosa NIES-843	K14441	2.8.4.4		0	0	0	0	0	0	0	0	0	0	0.00365631	0
RIMO_CAMFF Ribosomal protein S12 methylthiotransferase RimO OS=Campylobacter fetus subsp. fetus (strain 82-40) GN=rimO PE=3 SV=1	Campylobacter fetus subsp. fetus 82-40	-	2.8.4.4		0	0	0	0	0	0	0	0	0	0	0	0
RIMO_CARHZ Ribosomal protein S12 methylthiotransferase RimO OS=Carboxydothermus hydrogenoformans (strain ATCC BAA-161 / DSM 6008 / Z-2901) GN=rimO PE=3 SV=1	root	K14441	2.8.4.4		0	0	0	0	0	0	0	0	0	0.0036735	0.00365631	0
SELA_ALKOO L-seryl-tRNA(Sec) selenium transferase OS=Alkaliphilus oremlandii (strain OhILAs) GN=selA PE=3 SV=1	Alkaliphilus oremlandii OhILAs	K01042	2.9.1.1		0	0	0	0	0	0	0	0	0	0	0	0
SELA_ACTP2 L-seryl-tRNA(Sec) selenium transferase OS=Actinobacillus pleuropneumoniae serotype 5b (strain L20) GN=selA PE=3 SV=1	Actinobacillus pleuropneumoniae serovar 5b str. L20	K01042	2.9.1.1		0	0	0	0	0	0	0	0	0.0043262	0.0036735	0	0
MG: Putative polysaccharide deacetylase YheN OS=Bacillus subtilis (strain 168) GN=yheN PE=3 SV=1 [O07596] Score: 106.0	Bacillus subtilis subsp. subtilis str. 168	-	3.-.-.-		0	0	0	0	0	0	0	0	0.0043262	0.0036735	0	0
Y968_STAEQ Uncharacterized hydrolase SERP0968 OS=Staphylococcus epidermidis (strain ATCC 35984 / RP62A) GN=SERP0968 PE=3 SV=1	Staphylococcus epidermidis RP62A	-	3.-.-.-		0	0	0	0	0	0	0	0	0	0	0.00365631	0
YECD_ECO57 Uncharacterized isochorismatase family protein YecD OS=Escherichia coli O157:H7 GN=yecD PE=3 SV=2	Escherichia coli O157:H7	-	3.-.-.-		0	0	0	0	0	0	0	0	0	0	0	0
MBLC1_RAT Metallo-beta-lactamase domain-containing protein 1 OS=Rattus norvegicus GN=Mblac1 PE=2 SV=1	Rattus norvegicus	-	3.-.-.-		0	0	0	0	0	0	0	0	0	0	0	0
CAS1_THEPD CRISPR-associated endonuclease Cas1 OS=Thermofilum pendens (strain Hrk 5) GN=cas1 PE=3 SV=1	Thermofilum pendens Hrk 5	K15342	3.1.-.-		0	0	0	0	0	0.00473393	0	0	0	0	0	0
NUCS_STRAW Endonuclease NucS OS=Streptomyces avermitilis (strain ATCC 31267 / DSM 46492 / JCM 5070 / NBRC 14893 / NCIMB 12804 / NRRL 8165 / MA-4680) GN=nucS PE=3 SV=1	Streptomyces avermitilis MA-4680	K07503	3.1.-.-		0.0162558	0.00469197	0.0502089	0.0186497	0.0466331	0.066275	0	0.00946522	0.0129786	0.0036735	0.00731261	0.0153104
YBEY_SULSY Endoribonuclease YbeY OS=Sulfurihydrogenibium sp. (strain YO3AOP1) GN=ybeY PE=3 SV=1	Sulfurihydrogenibium sp. YO3AOP1	K07042	3.1.-.-		0	0	0	0	0	0	0.0199173	0.00631014	0.0129786	0.014694	0.0219378	0.0153104
RNY_BACV8 Ribonuclease Y OS=Bacteroides vulgatus (strain ATCC 8482 / DSM 1447 / JCM 5826 / NBRC 14291 / NCTC 11154) GN=rny PE=3 SV=1	Bacteroides vulgatus ATCC 8482	K18682	3.1.-.-		0	0	0	0	0.00466331	0	0	0	0	0	0	0
YBEY_THEEB Endoribonuclease YbeY OS=Thermosynechococcus elongatus (strain BP-1) GN=ybeY PE=3 SV=1	Thermosynechococcus elongatus BP-1	K07042	3.1.-.-		0	0	0	0.00466242	0	0	0	0	0	0	0	0
MAZF_STAHJ Endoribonuclease MazF OS=Staphylococcus haemolyticus (strain JCSC1435) GN=mazF PE=3 SV=1	Staphylococcus haemolyticus JCSC1435	K07171	3.1.-.-		0	0	0	0	0	0	0	0	0.0043262	0	0	0
YBEY_LACH4 Endoribonuclease YbeY OS=Lactobacillus helveticus (strain DPC 4571) GN=ybeY PE=3 SV=1	Lactobacillus	K07042	3.1.-.-		0	0	0	0	0	0	0	0	0	0	0	0
YBEY_STRMU Endoribonuclease YbeY OS=Streptococcus mutans serotype c (strain ATCC 700610 / UA159) GN=ybeY PE=3 SV=1	Streptococcus mutans UA159	K07042	3.1.-.-		0	0	0	0	0	0	0	0	0	0	0	0
YQGF_STRMU Putative pre-16S rRNA nuclease OS=Streptococcus mutans serotype c (strain ATCC 700610 / UA159) GN=SMU_2078c PE=3 SV=1	Streptococcus	K07447	3.1.-.-		0	0	0	0	0	0	0	0	0	0	0	0
RNY_CLOPS Ribonuclease Y OS=Clostridium perfringens (strain SM101 / Type A) GN=rny PE=3 SV=1	Clostridium perfringens SM101	K18682	3.1.-.-		0	0	0	0	0	0	0	0	0	0	0	0
MUTS2_PEPD6 Endonuclease MutS2 OS=Peptoclostridium difficile (strain 630) GN=mutS2 PE=3 SV=1	Clostridium difficile 630	K07456	3.1.-.-		0.00541859	0	0	0	0	0	0	0	0	0	0	0
TN5P_ECOLX Transposase for transposon Tn5 OS=Escherichia coli GN=tnpA PE=1 SV=1	Escherichia coli	-	3.1.-.-		0	0	0	0	0	0	0	0	0	0	0	0
YQGF_HAEIN Putative pre-16S rRNA nuclease OS=Haemophilus influenzae (strain ATCC 51907 / DSM 11121 / KW20 / Rd) GN=HI_0305 PE=3 SV=1	Haemophilus influenzae	K07447	3.1.-.-		0.00541859	0.00469197	0	0.00466242	0	0.00473393	0.00995867	0	0.0043262	0.022041	0.0219378	0.0038276
FEN1_ASPNC Flap endonuclease 1 OS=Aspergillus niger (strain CBS 513.88 / FGSC A1513) GN=fen1 PE=3 SV=1	Aspergillus niger CBS 513.88	K04799	3.1.-.-		0	0	0	0	0	0	0.00497934	0	0	0	0	0
REXO4_DEBHA RNA exonuclease 4 OS=Debaryomyces hansenii (strain ATCC 36239 / CBS 767 / JCM 1990 / NBRC 0083 / IGC 2968) GN=REX4 PE=3 SV=2	Debaryomyces hansenii CBS767	K18327	3.1.-.-		0	0	0	0.00466242	0	0	0	0	0	0	0	0
YD109_YEAST Putative lipase YDL109C OS=Saccharomyces cerevisiae (strain ATCC 204508 / S288c) GN=YDL109C PE=1 SV=1	Saccharomyces cerevisiae S288c	-	3.1.-.-		0	0	0	0	0.00466331	0	0	0	0	0	0	0
ERI3_MOUSE ERI1 exoribonuclease 3 OS=Mus musculus GN=Eri3 PE=1 SV=1	Mus musculus	K18418	3.1.-.-		0	0	0	0	0	0	0	0	0	0	0	0
SLX1_LEIIN Structure-specific endonuclease subunit SLX1 homolog OS=Leishmania infantum GN=LinJ25.1380 PE=3 SV=1	Leishmania infantum	K15078	3.1.-.-		0	0	0	0	0	0	0	0	0	0	0	0
BBD1_ORYSI Bifunctional nuclease 1 OS=Oryza sativa subsp. indica GN=BBD1 PE=3 SV=1	Oryza sativa Indica Group	-	3.1.-.-		0	0	0	0	0	0	0	0	0	0	0	0
ADDA_LACDA ATP-dependent helicase/nuclease subunit A OS=Lactobacillus delbrueckii subsp. bulgaricus (strain ATCC 11842 / DSM 20081 / JCM 1002 / NBRC 13953 / NCIMB 11778) GN=addA PE=3 SV=1	Lactobacillus delbrueckii subsp. bulgaricus ATCC 11842	K16898	3.1.-.- 3.6.4.12		0	0	0	0.00466242	0	0	0	0	0	0	0	0
ULAG_SHISS Probable L-ascorbate-6-phosphate lactonase UlaG OS=Shigella sonnei (strain Ss046) GN=ulaG PE=3 SV=2	Enterobacteriaceae	K03476	3.1.1.-		0	0	0	0	0	0	0.00995867	0	0.0043262	0	0.00365631	0.0038276
GDL35_ARATH GDSL esterase/lipase At2g19010 OS=Arabidopsis thaliana GN=At2g19010 PE=2 SV=1	Arabidopsis thaliana	-	3.1.1.-		0	0	0	0	0	0	0	0	0	0	0	0
MG: Carboxylesterase NlhH OS=Mycobacterium tuberculosis (strain ATCC 25618 / H37Rv) GN=nlhH PE=1 SV=1 [P9WK87] Score: 100.0	Mycobacterium tuberculosis	-	3.1.1.1		0	0	0	0	0	0	0.00497934	0	0	0	0	0
PTH_MACCJ Peptidyl-tRNA hydrolase OS=Macrococcus caseolyticus (strain JCSC5402) GN=pth PE=3 SV=1	Macrococcus caseolyticus JCSC5402	K01056	3.1.1.29		0	0	0	0	0	0	0	0	0	0	0	0
ATG15_CANGA Putative lipase ATG15 OS=Candida glabrata (strain ATCC 2001 / CBS 138 / JCM 3761 / NBRC 0622 / NRRL Y-65) GN=ATG15 PE=3 SV=1	Candida glabrata CBS 138	K17900	3.1.1.3		0	0	0	0	0	0	0.00497934	0	0	0	0	0
AAAD_MOUSE Arylacetamide deacetylase OS=Mus musculus GN=Aadac PE=1 SV=3	Mus musculus	K13616	3.1.1.3		0	0	0	0	0	0	0	0	0	0	0	0
LIPP_PIG Pancreatic triacylglycerol lipase OS=Sus scrofa GN=PNLIP PE=1 SV=2	Mammalia	-	3.1.1.3		0.547277	0.652184	0.502089	0.624764	0.498974	0.468659	0.293781	0.293422	0.21631	0.191022	0.226691	0.244967
G1M5Y7_AILME Triacylglycerol lipase OS=Ailuropoda melanoleuca GN=PNLIPRP1 PE=3 SV=1	Mammalia	K14074	3.1.1.3		0.0325115	0.0328438	0.0167363	0.0372993	0.0279799	0.0142018	0	0.00315507	0	0	0	0
6PGL_MYCTO 6-phosphogluconolactonase OS=Mycobacterium tuberculosis (strain CDC 1551 / Oshkosh) GN=pgl PE=3 SV=1	Mycobacterium	K01057	3.1.1.31		0	0	0	0	0	0	0	0	0	0	0	0
PA22_PIG Phospholipase A2, minor isoenzyme OS=Sus scrofa PE=1 SV=1	Mammalia	-	3.1.1.4		0.287185	0.234599	0	0	0.279799	0	0.0846487	0.0820319	0.0692191	0.080817	0.106033	0.137794
PA21B_STRCA Phospholipase A2 (Fragment) OS=Struthio camelus GN=PLA2G1B PE=1 SV=1	Chordata	-	3.1.1.4		0	0	0	0	0	0	0.00497934	0	0.0043262	0	0	0
PLB1_MONDO Phospholipase B1, membrane-associated OS=Monodelphis domestica GN=PLB1 PE=2 SV=1	Mammalia	K14621	3.1.1.4 3.1.1.5		0.0596044	0.0563037	0.0390514	0.055949	0.0512964	0.066275	0	0	0	0.014694	0.0109689	0.0114828
PLB1_HUMAN Phospholipase B1, membrane-associated OS=Homo sapiens GN=PLB1 PE=1 SV=3	Mammalia	K14621	3.1.1.4 3.1.1.5		0.428068	0.534885	0.184099	0.517528	0.512964	0.497063	0	0	0	0.0183675	0.0182815	0.0153104
HEMA_INCYB Hemagglutinin-esterase-fusion glycoprotein OS=Influenza C virus (strain C/Yamagata/4/1988) GN=HE PE=3 SV=1	Influenza C virus (C/Yamagata/4/88)	-	3.1.1.53		0	0	0	0	0	0	0	0	0	0.0036735	0	0
CHEB3_SYNWW Chemotaxis response regulator protein-glutamate methylesterase 3 OS=Syntrophomonas wolfei subsp. wolfei (strain DSM 2245B / Goettingen) GN=cheB3 PE=3 SV=1	Syntrophomonas wolfei subsp. wolfei str. Goettingen	K03412	3.1.1.61		0	0	0	0	0	0	0	0	0	0	0	0
CHEB2_CHRVO Chemotaxis response regulator protein-glutamate methylesterase of group 2 operon OS=Chromobacterium violaceum (strain ATCC 12472 / DSM 30191 / JCM 1249 / NBRC 12614 / NCIMB 9131 / NCTC 9757) GN=cheB2 PE=3 SV=1	Chromobacterium violaceum ATCC 12472	K03412	3.1.1.61		0	0	0	0	0	0	0	0	0	0	0	0
CHEB_NITMU Chemotaxis response regulator protein-glutamate methylesterase OS=Nitrosospira multiformis (strain ATCC 25196 / NCIMB 11849) GN=cheB PE=3 SV=1	Nitrosospira multiformis ATCC 25196	K03412	3.1.1.61		0	0	0	0	0	0	0	0	0	0	0	0.0038276
CHEB_ECOUT Chemotaxis response regulator protein-glutamate methylesterase OS=Escherichia coli (strain UTI89 / UPEC) GN=cheB PE=3 SV=1	Enterobacteriaceae	K03412	3.1.1.61		0	0	0	0	0	0	0	0	0	0	0	0
CESA_RUMFL Multidomain esterase OS=Ruminococcus flavefaciens GN=cesA PE=1 SV=1	Ruminococcus flavefaciens	-	3.1.1.72 3.1.1.-		0	0	0	0	0	0	0	0.00315507	0	0	0	0
CUTI1_PENRW Probable cutinase 1 OS=Penicillium rubens (strain ATCC 28089 / DSM 1075 / NRRL 1951 / Wisconsin 54-1255) GN=Pc21g21220 PE=3 SV=1	Penicillium chrysogenum Wisconsin 54-1255	K08095	3.1.1.74		0	0	0	0	0.00466331	0	0	0	0	0	0	0
CUTI1_COLGL Cutinase 1 OS=Colletotrichum gloeosporioides GN=CUTA PE=1 SV=1	Colletotrichum gloeosporioides	-	3.1.1.74		0	0	0	0	0	0	0	0	0	0	0	0
RDMC_STREF Aclacinomycin methylesterase RdmC OS=Streptomyces purpurascens GN=rdmC PE=1 SV=1	Streptomyces purpurascens	K15957	3.1.1.95		0	0	0	0	0.00466331	0	0	0	0	0	0	0
DTDA_METBU D-aminoacyl-tRNA deacylase OS=Methanococcoides burtonii (strain DSM 6242 / NBRC 107633 / OCM 468 / ACE-M) GN=dtdA PE=3 SV=1	Methanococcoides burtonii DSM 6242	K09716	3.1.1.96		0	0	0	0	0	0	0	0	0	0	0	0
DTD_CORK4 D-aminoacyl-tRNA deacylase OS=Corynebacterium kroppenstedtii (strain DSM 44385 / CCUG 35717) GN=dtd PE=3 SV=1	Corynebacterium kroppenstedtii DSM 44385	K07560	3.1.1.96		0	0	0	0	0	0	0	0	0	0	0.00365631	0
DTD_BACV8 D-aminoacyl-tRNA deacylase OS=Bacteroides vulgatus (strain ATCC 8482 / DSM 1447 / JCM 5826 / NBRC 14291 / NCTC 11154) GN=dtd PE=3 SV=1	Bacteroides vulgatus ATCC 8482	K07560	3.1.1.96		0	0	0	0	0	0	0	0.00315507	0	0	0	0
DTD_BACHD D-aminoacyl-tRNA deacylase OS=Bacillus halodurans (strain ATCC BAA-125 / DSM 18197 / FERM 7344 / JCM 9153 / C-125) GN=dtd PE=3 SV=1	Bacillus halodurans C-125	K07560	3.1.1.96		0	0	0.00557877	0	0	0	0	0	0	0	0	0
DTD_LISMO D-aminoacyl-tRNA deacylase OS=Listeria monocytogenes serovar 1/2a (strain ATCC BAA-679 / EGD-e) GN=dtd PE=3 SV=1	Listeria monocytogenes EGD-e	K07560	3.1.1.96		0	0	0	0	0	0	0	0	0	0	0	0
DTD_VARPS D-aminoacyl-tRNA deacylase OS=Variovorax paradoxus (strain S110) GN=dtd PE=3 SV=1	Variovorax paradoxus S110	K07560	3.1.1.96		0	0	0	0	0	0	0	0	0.0043262	0.0036735	0	0
EXO2_BPR69 Exonuclease subunit 2 OS=Enterobacteria phage RB69 GN=46 PE=4 SV=2	Enterobacteria phage RB69	K03546	3.1.11.-		0	0	0	0	0	0	0	0	0	0	0	0
RECC_MYCTO RecBCD enzyme subunit RecC OS=Mycobacterium tuberculosis (strain CDC 1551 / Oshkosh) GN=recC PE=3 SV=1	Mycobacterium tuberculosis CDC1551	K03583	3.1.11.5		0	0	0	0	0	0	0	0	0.0043262	0	0	0
RECB_BORBU RecBCD enzyme subunit RecB OS=Borrelia burgdorferi (strain ATCC 35210 / B31 / CIP 102532 / DSM 4680) GN=recB PE=3 SV=1	Borrelia burgdorferi B31	K03582	3.1.11.5		0	0	0	0	0	0	0	0	0	0	0	0
EX7L_SYNSC Exodeoxyribonuclease 7 large subunit OS=Synechococcus sp. (strain CC9605) GN=xseA PE=3 SV=2	Synechococcus sp. CC9605	K03601	3.1.11.6		0	0	0	0	0	0	0	0	0	0	0	0
RRP41_METMA Exosome complex component Rrp41 OS=Methanosarcina mazei (strain ATCC BAA-159 / DSM 3647 / Goe1 / Go1 / JCM 11833 / OCM 88) GN=rrp41 PE=3 SV=1	Methanosarcina mazei Go1	K11600	3.1.13.-		0	0	0	0	0.00466331	0	0	0	0	0	0	0
RRP41_METKA Exosome complex component Rrp41 OS=Methanopyrus kandleri (strain AV19 / DSM 6324 / JCM 9639 / NBRC 100938) GN=rrp41 PE=3 SV=1	Methanopyrus kandleri AV19	K11600	3.1.13.-		0	0	0	0	0	0	0	0	0.0043262	0	0	0
DSS1_YEAST Exoribonuclease II, mitochondrial OS=Saccharomyces cerevisiae (strain ATCC 204508 / S288c) GN=DSS1 PE=1 SV=2	Saccharomyces cerevisiae S288c	K19782	3.1.13.1		0	0	0	0	0	0	0	0	0	0	0	0
PAN2_YEAST PAB-dependent poly(A)-specific ribonuclease subunit PAN2 OS=Saccharomyces cerevisiae (strain ATCC 204508 / S288c) GN=PAN2 PE=1 SV=1	Saccharomyces cerevisiae S288c	K12571	3.1.13.4		0	0	0	0	0	0	0	0	0	0	0	0
YBHC_ECOLI Putative acyl-CoA thioester hydrolase YbhC OS=Escherichia coli (strain K12) GN=ybhC PE=1 SV=2	Escherichia coli K-12	K01051	3.1.2.-		0	0	0	0	0	0	0	0	0	0	0	0
DNAT2_ARATH 1,4-dihydroxy-2-naphthoyl-CoA thioesterase 2 OS=Arabidopsis thaliana GN=DHNAT2 PE=2 SV=1	Arabidopsis thaliana	-	3.1.2.-		0	0	0	0	0	0	0	0	0	0.0036735	0	0
T1RH_HAEIN Putative type I restriction enzyme HindVIIP R protein OS=Haemophilus influenzae (strain ATCC 51907 / DSM 11121 / KW20 / Rd) GN=HI_1285 PE=3 SV=1	Haemophilus influenzae Rd KW20	K01153	3.1.21.3		0	0	0	0	0	0	0	0.00315507	0	0	0.00365631	0
T2V1_GEOSE Type-2 restriction enzyme BstVI OS=Geobacillus stearothermophilus GN=bstVIR PE=3 SV=1	Geobacillus stearothermophilus	-	3.1.21.4		0	0	0	0	0	0	0	0	0	0	0	0
MUS81_NEUCR Crossover junction endonuclease mus-81 OS=Neurospora crassa (strain ATCC 24698 / 74-OR23-1A / CBS 708.71 / DSM 1257 / FGSC 987) GN=mus-81 PE=3 SV=1	Neurospora crassa OR74A	K08991	3.1.22.-		0	0	0	0	0	0	0	0	0	0	0	0
RUVC_BURL3 Crossover junction endodeoxyribonuclease RuvC OS=Burkholderia lata (strain ATCC 17760 / LMG 22485 / NCIMB 9086 / R18194 / 383) GN=ruvC PE=3 SV=1	Burkholderia lata	K01159	3.1.22.4		0	0	0	0	0.00466331	0	0	0	0	0	0	0
RNZ_METVS Ribonuclease Z OS=Methanococcus vannielii (strain SB / ATCC 35089 / DSM 1224) GN=rnz PE=3 SV=1	Methanococcus vannielii SB	K00784	3.1.26.11		0	0	0	0	0	0	0	0	0.0129786	0	0.00731261	0.0229656
RNZ_PYRHO Ribonuclease Z OS=Pyrococcus horikoshii (strain ATCC 700860 / DSM 12428 / JCM 9974 / NBRC 100139 / OT-3) GN=rnz PE=3 SV=1	Pyrococcus horikoshii OT3	K00784	3.1.26.11		0	0	0	0	0	0	0	0	0	0	0	0
RNH2_PHOLL Ribonuclease HII OS=Photorhabdus luminescens subsp. laumondii (strain DSM 15139 / CIP 105565 / TT01) GN=rnhB PE=3 SV=1	Photorhabdus luminescens subsp. laumondii TTO1	K03470	3.1.26.4		0	0	0	0	0	0	0	0	0	0	0	0
RNP4_METJA Ribonuclease P protein component 4 OS=Methanocaldococcus jannaschii (strain ATCC 43067 / DSM 2661 / JAL-1 / JCM 10045 / NBRC 100440) GN=rnp4 PE=1 SV=1	Methanocaldococcus jannaschii DSM 2661	K03540	3.1.26.5		0.00541859	0	0	0	0	0	0	0	0	0	0	0
RNP2_METKA Ribonuclease P protein component 2 OS=Methanopyrus kandleri (strain AV19 / DSM 6324 / JCM 9639 / NBRC 100938) GN=rnp2 PE=3 SV=2	Methanopyrus kandleri AV19	K03537	3.1.26.5		0	0	0	0	0	0	0	0	0	0	0	0
INT11_PONAB Integrator complex subunit 11 OS=Pongo abelii GN=CPSF3L PE=2 SV=2	Pongo abelii	K13148	3.1.27.-		0	0	0	0	0	0	0	0	0	0.0036735	0	0
SHUT_PSHV1 Virion host shutoff protein OS=Psittacid herpesvirus 1 (isolate Amazon parrot/-/97-0001/1997) GN=UL41 PE=3 SV=1	Psittacid herpesvirus 1 Amazon parrot/1997	-	3.1.27.-		0	0	0	0	0	0	0	0	0	0.0036735	0	0
RNAS1_MUSPA Ribonuclease pancreatic OS=Mus pahari GN=Rnase1 PE=2 SV=1	Mus pahari	-	3.1.27.5		0	0	0	0	0	0.00473393	0	0	0	0	0	0
SAC1_ARATH Phosphoinositide phosphatase SAC1 OS=Arabidopsis thaliana GN=SAC1 PE=1 SV=1	Arabidopsis thaliana	-	3.1.3.-		0	0.00469197	0	0	0	0	0	0	0	0	0	0
PTPRQ_HUMAN Phosphatidylinositol phosphatase PTPRQ OS=Homo sapiens GN=PTPRQ PE=1 SV=2	Homo sapiens	-	3.1.3.- 3.1.3.48		0	0	0	0	0	0	0	0	0	0.0036735	0	0
BPPI_STRP6 Putative bifunctional phosphatase/peptidyl-prolyl cis-trans isomerase OS=Streptococcus pyogenes serotype M6 (strain ATCC BAA-946 / MGAS10394) GN=M6_Spy1377 PE=1 SV=1	Streptococcus pyogenes MGAS10394	K03768	3.1.3.- 5.2.1.8		0	0	0	0	0	0	0	0	0	0	0	0
PPBI_MOUSE Intestinal-type alkaline phosphatase OS=Mus musculus GN=Iap PE=2 SV=1	Mammalia	-	3.1.3.1		0.0433487	0.0516117	0	0.0606114	0.0466331	0.0378714	0	0	0	0	0.00365631	0
PPBN_MOUSE Alkaline phosphatase, placental-like OS=Mus musculus GN=Alppl2 PE=2 SV=2	Mammalia	-	3.1.3.1		0.157139	0.201755	0.0836815	0.209809	0.223839	0.170421	0.00497934	0.00631014	0.0043262	0.007347	0.00731261	0
PPBI1_RAT Intestinal-type alkaline phosphatase 1 OS=Rattus norvegicus GN=Alpi PE=1 SV=1	Mammalia	-	3.1.3.1		0.15172	0.197063	0.072524	0.186497	0.223839	0.160954	0	0.00631014	0.0043262	0.007347	0.00731261	0
AGP_ECOLI Glucose-1-phosphatase OS=Escherichia coli (strain K12) GN=agp PE=1 SV=1	Escherichia coli K-12	K01085	3.1.3.10		0	0	0	0	0	0.00473393	0.029876	0.0189304	0.0173048	0	0	0
F16PC_LISIN Fructose-1,6-bisphosphatase class 3 OS=Listeria innocua serovar 6a (strain CLIP 11262) GN=fbp PE=3 SV=1	Listeria innocua Clip11262	K04041	3.1.3.11		0	0.00469197	0.00557877	0.00466242	0.00466331	0	0	0	0	0.0036735	0	0
F16P1_ARATH Fructose-1,6-bisphosphatase, chloroplastic OS=Arabidopsis thaliana GN=FBP PE=1 SV=2	Streptophyta	K03841	3.1.3.11		0	0	0	0	0	0	0	0	0	0	0	0
F16P_KLULA Fructose-1,6-bisphosphatase OS=Kluyveromyces lactis (strain ATCC 8585 / CBS 2359 / DSM 70799 / NBRC 1267 / NRRL Y-1140 / WM37) GN=FBP1 PE=3 SV=2	root	K03841	3.1.3.11		0	0	0	0	0	0	0	0	0	0	0	0
F16P2_SACHY Fructose-1,6-bisphosphatase, cytosolic OS=Saccharum hybrid GN=CFBP PE=2 SV=2	root	-	3.1.3.11		0	0	0	0	0	0	0	0	0	0	0	0
F16P2_MUSAC Fructose-1,6-bisphosphatase, cytosolic OS=Musa acuminata GN=FBPban1 PE=2 SV=1	root	-	3.1.3.11		0	0	0	0	0	0	0	0	0	0	0	0
F16PA_PHOPR Fructose-1,6-bisphosphatase class 1 OS=Photobacterium profundum (strain SS9) GN=fbp PE=3 SV=2	root	K03841	3.1.3.11		0	0	0	0	0	0	0	0	0	0	0	0
OTSB_ECOLI Trehalose-6-phosphate phosphatase OS=Escherichia coli (strain K12) GN=otsB PE=1 SV=2	Escherichia coli K-12	K01087	3.1.3.12		0	0	0	0	0	0	0	0	0	0.0036735	0	0
TPP9_ORYSJ Probable trehalose-phosphate phosphatase 9 OS=Oryza sativa subsp. japonica GN=TPP9 PE=3 SV=1	Oryza sativa Japonica Group	K01087	3.1.3.12		0	0	0	0	0	0	0	0	0	0.0036735	0	0
PGAM2_RAT Phosphoglycerate mutase 2 OS=Rattus norvegicus GN=Pgam2 PE=1 SV=2	root	K01834	3.1.3.13 5.4.2.11 5.4.2.4		0	0.00469197	0	0.00466242	0.00932662	0.00946786	0.014938	0.00631014	0.0043262	0.0036735	0.00365631	0
PGAM1_RAT Phosphoglycerate mutase 1 OS=Rattus norvegicus GN=Pgam1 PE=1 SV=4	root	K01834	3.1.3.13 5.4.2.11 5.4.2.4		0	0.00469197	0	0.00466242	0.00932662	0.00946786	0.014938	0.00631014	0.0043262	0.0036735	0.00365631	0
P2C46_ORYSJ Putative protein phosphatase 2C 46 OS=Oryza sativa subsp. japonica GN=Os05g0111800 PE=3 SV=2	Oryza sativa Japonica Group	-	3.1.3.16		0	0	0	0	0	0	0	0	0	0	0	0
ACP1_CAEEL Putative acid phosphatase 1 OS=Caenorhabditis elegans GN=apc-1 PE=1 SV=2	Caenorhabditis elegans	-	3.1.3.2		0	0	0	0	0	0	0	0	0	0	0	0
PHO11_CAEEL Putative acid phosphatase 11 OS=Caenorhabditis elegans GN=pho-11 PE=3 SV=2	Caenorhabditis elegans	K01078	3.1.3.2		0	0	0	0	0	0	0	0.00315507	0	0	0	0
PPA_ECOLI Periplasmic AppA protein OS=Escherichia coli (strain K12) GN=appA PE=1 SV=2	Escherichia coli K-12	K01093	3.1.3.2 3.1.3.26		0	0	0	0	0	0	0	0	0	0	0	0
SPP2_ORYSJ Sucrose-phosphatase 2 OS=Oryza sativa subsp. japonica GN=SPP2 PE=1 SV=1	Poaceae	-	3.1.3.24		0	0	0	0	0	0	0	0	0	0	0	0
SPP1_MAIZE Sucrose-phosphatase 1 OS=Zea mays GN=SPP1 PE=1 SV=1	Poaceae	-	3.1.3.24		0	0	0	0	0	0	0	0	0	0	0	0
SUHB_SALTY Inositol-1-monophosphatase OS=Salmonella typhimurium (strain LT2 / SGSC1412 / ATCC 700720) GN=suhB PE=3 SV=1	Enterobacteriaceae	K01092	3.1.3.25		0	0	0	0.00466242	0	0	0	0.00631014	0.0043262	0	0	0
IMPA3_DROME Putative inositol monophosphatase 3 OS=Drosophila melanogaster GN=CG15743 PE=2 SV=1	Drosophila melanogaster	K15759	3.1.3.25		0	0	0	0	0	0	0.00497934	0	0	0	0	0
PTPM1_DROME Phosphatidylglycerophosphatase and protein-tyrosine phosphatase 1 OS=Drosophila melanogaster GN=Plip PE=2 SV=1	Drosophila melanogaster	K14165	3.1.3.27 3.1.3.16 3.1.3.48		0	0	0	0	0	0	0	0	0	0	0	0
SERB_STRT2 Phosphoserine phosphatase OS=Streptococcus thermophilus (strain ATCC BAA-250 / LMG 18311) GN=serB PE=1 SV=1	Streptococcus thermophilus LMG 18311	K01079	3.1.3.3		0	0	0	0	0	0	0	0	0	0	0	0
SERB_ARCFU Phosphoserine phosphatase OS=Archaeoglobus fulgidus (strain ATCC 49558 / VC-16 / DSM 4304 / JCM 9628 / NBRC 100126) GN=AF_2138 PE=3 SV=1	root	K01079	3.1.3.3		0	0	0	0	0	0	0	0	0	0	0	0
S17P_WHEAT Sedoheptulose-1,7-bisphosphatase, chloroplastic OS=Triticum aestivum PE=2 SV=1	Streptophyta	-	3.1.3.37		0	0	0	0	0	0	0	0	0	0	0	0
S17P_ARATH Sedoheptulose-1,7-bisphosphatase, chloroplastic OS=Arabidopsis thaliana GN=At3g55800 PE=2 SV=1	Streptophyta	K01100	3.1.3.37		0	0	0	0	0	0	0	0	0	0	0	0
CSW_DROVI Tyrosine-protein phosphatase corkscrew (Fragment) OS=Drosophila virilis GN=csw PE=3 SV=1	Drosophila virilis	-	3.1.3.48		0	0	0	0.00466242	0	0	0	0	0	0	0	0
SURE_PSEAB 5-nucleotidase SurE OS=Pseudomonas aeruginosa (strain UCBPP-PA14) GN=surE PE=3 SV=1	Pseudomonas aeruginosa	K03787	3.1.3.5		0	0	0	0	0.00932662	0	0	0	0	0.0036735	0	0
SURE_HELAH 5-nucleotidase SurE OS=Helicobacter acinonychis (strain Sheeba) GN=surE PE=3 SV=1	root	K03787	3.1.3.5		0	0	0	0	0	0	0	0	0	0	0	0
SURE_RHOP5 5-nucleotidase SurE OS=Rhodopseudomonas palustris (strain BisA53) GN=surE PE=3 SV=1	root	K03787	3.1.3.5		0	0	0	0	0	0	0	0	0	0	0	0
CPDB_ECOLI 2,3-cyclic-nucleotide 2-phosphodiesterase/3-nucleotidase OS=Escherichia coli (strain K12) GN=cpdB PE=1 SV=2	Escherichia coli K-12	K01119	3.1.3.6 3.1.4.16		0	0	0	0	0.00466331	0	0	0	0.0043262	0	0	0
COMB_THEVO Probable 2-phosphosulfolactate phosphatase OS=Thermoplasma volcanium (strain ATCC 51530 / DSM 4299 / JCM 9571 / NBRC 15438 / GSS1) GN=comB PE=3 SV=1	Thermoplasma volcanium GSS1	K05979	3.1.3.71		0	0	0	0	0	0	0	0	0	0	0	0
COMB_THET2 Probable 2-phosphosulfolactate phosphatase OS=Thermus thermophilus (strain HB27 / ATCC BAA-163 / DSM 7039) GN=comB PE=3 SV=1	Thermus thermophilus HB27	K05979	3.1.3.71		0	0	0	0	0	0	0.00497934	0	0	0	0.00365631	0.0038276
ENOPH_MAGO7 Enolase-phosphatase E1 OS=Magnaporthe oryzae (strain 70-15 / ATCC MYA-4617 / FGSC 8958) GN=UTR4 PE=3 SV=3	Magnaporthe oryzae 70-15	K09880	3.1.3.77		0.00541859	0.00469197	0	0	0	0	0	0	0	0	0	0
YSNB_BACSU Putative metallophosphoesterase YsnB OS=Bacillus subtilis (strain 168) GN=ysnB PE=3 SV=2	Bacillus subtilis subsp. subtilis str. 168	K07095	3.1.4.-		0	0	0	0	0.00466331	0	0	0	0	0	0	0
ENPP3_PONAB Ectonucleotide pyrophosphatase/phosphodiesterase family member 3 OS=Pongo abelii GN=ENPP3 PE=2 SV=1	Mammalia	K01513	3.1.4.1 3.6.1.9		0.0162558	0.00469197	0.0167363	0.00932484	0.0139899	0.0142018	0	0	0	0	0	0
PLC_DICDI 1-phosphatidylinositol 4,5-bisphosphate phosphodiesterase OS=Dictyostelium discoideum GN=plc PE=2 SV=1	Dictyostelium discoideum	K05857	3.1.4.11		0	0	0	0	0	0	0	0	0	0	0	0
PDE1_CAEEL Probable 3,5-cyclic phosphodiesterase pde-1 OS=Caenorhabditis elegans GN=pde-1 PE=1 SV=2	Caenorhabditis elegans	K13755	3.1.4.17		0	0	0	0	0	0	0	0	0	0	0	0
GLPQ_ECOLI Glycerophosphoryl diester phosphodiesterase OS=Escherichia coli (strain K12) GN=glpQ PE=1 SV=2	Escherichia coli K-12	K01126	3.1.4.46		0	0	0	0.00932484	0.00466331	0.00946786	0.00497934	0.00315507	0.0043262	0.007347	0.00365631	0
GDPD5_ARATH Glycerophosphodiester phosphodiesterase GDPD5 OS=Arabidopsis thaliana GN=GDPD5 PE=2 SV=1	Arabidopsis thaliana	K01126	3.1.4.46		0	0	0	0	0	0	0	0	0	0	0	0
PDE7B_MOUSE cAMP-specific 3,5-cyclic phosphodiesterase 7B OS=Mus musculus GN=Pde7b PE=1 SV=1	Mus musculus	K18436	3.1.4.53		0	0	0	0	0	0	0	0	0	0	0	0.0038276
ARHL1_BOVIN [Protein ADP-ribosylarginine] hydrolase-like protein 1 OS=Bos taurus GN=ADPRHL1 PE=2 SV=1	Bos taurus	-	3.2.-.-		0	0	0	0	0	0.00473393	0	0	0	0	0	0.0038276
GLGX_SERP5 Glycogen debranching enzyme OS=Serratia proteamaculans (strain 568) GN=glgX PE=3 SV=1	Serratia proteamaculans 568	K02438	3.2.1.-		0	0	0	0	0	0	0	0	0	0	0	0
ARBA_CELJU Extracellular exo-alpha-(1->5)-L-arabinofuranosidase ArbA OS=Cellvibrio japonicus (strain Ueda107) GN=arbA PE=1 SV=1	Cellvibrio japonicus Ueda107	-	3.2.1.-		0	0	0	0	0	0.00473393	0	0	0	0	0	0
G1M054_AILME Alpha-mannosidase OS=Ailuropoda melanoleuca GN=MAN2B1 PE=3 SV=1	Ailuropoda melanoleuca	-	3.2.1.-		0.0108372	0.0375358	0.00557877	0.0466242	0.0233165	0.0331375	0	0	0	0	0	0
GLB1L_HUMAN Beta-galactosidase-1-like protein OS=Homo sapiens GN=GLB1L PE=2 SV=1	Homo sapiens	-	3.2.1.-		0	0	0	0	0	0	0	0	0	0	0	0
ACE_HUMAN Angiotensin-converting enzyme OS=Homo sapiens GN=ACE PE=1 SV=1	Mammalia	K01283	3.2.1.- 3.4.15.1		0	0	0.00557877	0	0	0	0	0	0	0	0	0
AMY_BACCI Alpha-amylase OS=Bacillus circulans PE=3 SV=1	Bacillus circulans	-	3.2.1.1		0	0	0	0	0	0	0	0	0	0	0	0
AMY_PSEHA Alpha-amylase OS=Pseudoalteromonas haloplanktis GN=amy PE=1 SV=3	Pseudoalteromonas haloplanktis	-	3.2.1.1		0	0	0	0	0	0	0	0	0	0.0036735	0	0
AMY_TENMO Alpha-amylase OS=Tenebrio molitor PE=1 SV=1	Tenebrio molitor	-	3.2.1.1		0	0.00938394	0	0	0.00466331	0	0.0846487	0.044171	0.0259572	0.128572	0.0402194	0.0306208
G1L4F3_AILME Alpha-amylase OS=Ailuropoda melanoleuca PE=3 SV=1	Chordata	-	3.2.1.1		32.2731	29.5641	31.2578	31.2941	33.0302	32.5268	36.8023	37.7567	38.4382	42.0322	39.2285	45.7207
AMY1_DROAN Alpha-amylase 1 OS=Drosophila ananassae GN=Amy35 PE=3 SV=3	Metazoa	K01176	3.2.1.1		0.0216743	0.0375358	0.0223151	0.0326369	0.0186532	0.0331375	0.194194	0.135668	0.155743	0.154287	0.146252	0.168415
AMYP_RAT Pancreatic alpha-amylase OS=Rattus norvegicus GN=Amy2 PE=2 SV=2	Metazoa	-	3.2.1.1		12.3598	10.6132	13.601	11.0359	12.078	12.0763	14.704	15.0497	14.7653	17.0267	16.4059	14.9851
AMY2B_HUMAN Alpha-amylase 2B OS=Homo sapiens GN=AMY2B PE=1 SV=1	Metazoa	K01176	3.2.1.1		12.3164	10.5522	13.5118	10.8867	11.9614	12.0384	14.6542	15.0592	14.6874	16.8724	16.2779	14.9277
AMYM_BACAD Maltogenic alpha-amylase OS=Bacillus acidopullulyticus PE=3 SV=1	Bacillus acidopullulyticus	-	3.2.1.133		0	0.00469197	0.00557877	0.00466242	0.00932662	0.00473393	0.014938	0.00631014	0.0043262	0.0404085	0.0255941	0.00765521
CHI8_ORYSJ Chitinase 8 OS=Oryza sativa subsp. japonica GN=Cht8 PE=2 SV=1	Oryza sativa Japonica Group	-	3.2.1.14		0	0	0	0	0	0	0	0	0	0	0	0
EBM_LILLO Mannosylglycoprotein endo-beta-mannosidase OS=Lilium longiflorum GN=EBM PE=1 SV=4	Streptophyta	-	3.2.1.152		0	0	0	0	0	0	0	0	0	0	0	0
REOX_BACHD Reducing end xylose-releasing exo-oligoxylanase OS=Bacillus halodurans (strain ATCC BAA-125 / DSM 18197 / FERM 7344 / JCM 9153 / C-125) GN=BH2105 PE=1 SV=1	Bacillus halodurans C-125	K15531	3.2.1.156		0	0	0	0.00932484	0	0.00473393	0	0	0	0	0	0
MG: Lysozyme M1 OS=Streptomyces globisporus GN=acm PE=1 SV=1 [P25310] Score: 72.4	Streptomyces globisporus	-	3.2.1.17		0	0	0	0	0	0	0.00497934	0.00315507	0.0043262	0.0036735	0.00365631	0.0038276
MG: Probable autolytic lysozyme OS=Clostridium perfringens (strain 13 / Type A) GN=lyc PE=3 SV=2 [P26836] Score: 204.0	Clostridium perfringens str. 13	K07273	3.2.1.17		0	0.00469197	0.00557877	0.00466242	0	0	0	0	0.0043262	0.0036735	0.00365631	0.0038276
LYSC_SYRSO Lysozyme C OS=Syrmaticus soemmerringii GN=LYZ PE=1 SV=1	Syrmaticus soemmerringii	-	3.2.1.17		0	0	0.00557877	0	0	0	0	0	0	0	0	0
LYSC_PHOVI Lysozyme C OS=Phoca vitulina GN=LYZ PE=2 SV=1	Chordata	K13915	3.2.1.17		0	0	0.00557877	0	0	0	0	0	0	0	0	0
NANH_CLOSE Sialidase OS=Clostridium septicum PE=3 SV=1	Clostridium septicum	-	3.2.1.18		0	0	0	0	0	0	0	0	0	0	0	0
UCDH_STRP1 Unsaturated chondroitin disaccharide hydrolase OS=Streptococcus pyogenes serotype M1 GN=ugl PE=1 SV=1	Streptococcus pyogenes serotype M1	K18581	3.2.1.180		0	0	0	0	0	0	0	0	0	0	0	0
AMYB_SECCE Beta-amylase (Fragment) OS=Secale cereale GN=BMY1 PE=2 SV=1	Poaceae	-	3.2.1.2		0.00541859	0.00938394	0.00557877	0.00466242	0.00932662	0.00946786	0	0	0	0	0	0
AMYB_HORVS Beta-amylase OS=Hordeum vulgare subsp. spontaneum GN=BMY1 PE=1 SV=1	Poaceae	-	3.2.1.2		0.0162558	0.0234599	0.0223151	0.0233121	0.0233165	0.0236696	0	0	0	0	0	0
D2HHN0_AILME Putative uncharacterized protein (Fragment) OS=Ailuropoda melanoleuca GN=PANDA_010628 PE=3 SV=1	Mammalia	K12047	3.2.1.20 3.2.1.3		0.298022	0.497349	0.786606	0.466242	0.326432	0.473393	0	0	0	0.0036735	0	0
MG: Beta-glucosidase OS=Ruminococcus albus PE=3 SV=1 [P15885] Score: 880.0	Ruminococcus albus	-	3.2.1.21		0	0	0	0	0	0	0	0	0	0	0	0
BGLA_THEMA Beta-glucosidase A OS=Thermotoga maritima (strain ATCC 43589 / MSB8 / DSM 3109 / JCM 10099) GN=bglA PE=1 SV=1	Thermotoga maritima MSB8	K05350	3.2.1.21		0	0	0	0	0	0	0	0	0.0043262	0	0	0
BGLA_ASPFN Probable beta-glucosidase A OS=Aspergillus flavus (strain ATCC 200026 / FGSC A1120 / NRRL 3357 / JCM 12722 / SRRC 167) GN=bglA PE=3 SV=1	Aspergillus flavus NRRL3357	K05349	3.2.1.21		0	0	0	0	0	0	0	0	0	0	0	0
GBA3_PONAB Cytosolic beta-glucosidase OS=Pongo abelii GN=GBA3 PE=2 SV=1	Hominidae	K05350	3.2.1.21		0	0	0	0	0	0	0.00497934	0	0	0.0036735	0	0
BGAL_SULAC Beta-galactosidase OS=Sulfolobus acidocaldarius (strain ATCC 33909 / DSM 639 / JCM 8929 / NBRC 15157 / NCIMB 11770) GN=bgaS PE=1 SV=2	Sulfolobus acidocaldarius DSM 639	K01190	3.2.1.23		0	0	0	0	0	0	0	0	0	0	0	0
BGAL_THETH Beta-galactosidase OS=Thermus thermophilus PE=1 SV=1	Thermus	-	3.2.1.23		0	0	0	0	0	0	0	0	0	0.0036735	0.00365631	0
BGAL_GEOKU Beta-galactosidase bgaB OS=Geobacillus kaustophilus GN=bgaB PE=1 SV=1	Geobacillus kaustophilus	-	3.2.1.23		0	0	0	0	0	0.00473393	0	0	0	0	0	0
BGA14_ARATH Beta-galactosidase 14 OS=Arabidopsis thaliana GN=BGAL14 PE=2 SV=2	Arabidopsis thaliana	-	3.2.1.23		0	0.00938394	0	0	0	0	0.00995867	0	0.00865239	0	0.00365631	0
BGAL6_ARATH Beta-galactosidase 6 OS=Arabidopsis thaliana GN=BGAL6 PE=2 SV=1	root	-	3.2.1.23		0.0108372	0.0140759	0.00557877	0.0139873	0.00932662	0.0189357	0	0	0	0	0	0
BGAL8_ARATH Beta-galactosidase 8 OS=Arabidopsis thaliana GN=BGAL8 PE=2 SV=2	root	-	3.2.1.23		0.0108372	0.0140759	0.00557877	0.0139873	0.00932662	0.0189357	0	0	0	0	0	0
MANA_CANEN Alpha-mannosidase OS=Canavalia ensiformis PE=1 SV=1	Canavalia ensiformis	-	3.2.1.24		0	0	0	0	0	0	0.00497934	0	0	0	0	0
MANA_LABPU Alpha-mannosidase (Fragments) OS=Lablab purpureus PE=1 SV=1	Lablab purpureus	-	3.2.1.24		0	0	0	0	0	0	0	0	0	0	0	0
MANBA_ASPCL Beta-mannosidase A OS=Aspergillus clavatus (strain ATCC 1007 / CBS 513.65 / DSM 816 / NCTC 3887 / NRRL 1) GN=mndA PE=3 SV=1	Aspergillus clavatus NRRL 1	K01192	3.2.1.25		0	0	0	0	0	0	0	0	0	0	0	0
TREA_CANAX Neutral trehalase OS=Candida albicans GN=NTC1 PE=1 SV=1	Candida albicans	-	3.2.1.28		0	0	0	0	0	0	0	0	0	0	0	0
BXL4_ARATH Beta-D-xylosidase 4 OS=Arabidopsis thaliana GN=BXL4 PE=1 SV=1	Arabidopsis thaliana	K15920	3.2.1.37		0.0108372	0.00938394	0.0111575	0.0186497	0.00932662	0.00946786	0	0	0	0	0	0
XYL2_MEDSV Beta-xylosidase/alpha-L-arabinofuranosidase 2 OS=Medicago sativa subsp. varia GN=Xyl2 PE=2 SV=1	Medicago sativa subsp. x varia	-	3.2.1.37 3.2.1.55		0.0270929	0.0281518	0.0223151	0.0279745	0.0186532	0.0284036	0	0	0	0	0	0
E13E_HORVU Glucan endo-1,3-beta-glucosidase GV OS=Hordeum vulgare PE=2 SV=2	Hordeum vulgare	-	3.2.1.39		0.00541859	0.00469197	0	0.00466242	0	0	0	0	0	0	0	0
E13B_HORVU Glucan endo-1,3-beta-glucosidase GII OS=Hordeum vulgare PE=1 SV=1	Hordeum vulgare	-	3.2.1.39		0.00541859	0.00469197	0	0	0	0	0	0	0	0	0	0
GUNY_DICD3 Minor endoglucanase Y OS=Dickeya dadantii (strain 3937) GN=celY PE=1 SV=1	Dickeya dadantii 3937	K01179	3.2.1.4		0	0	0	0	0	0	0	0	0	0	0	0
C3390_DROME Non-lysosomal glucosylceramidase OS=Drosophila melanogaster GN=CG33090 PE=1 SV=1	Drosophila melanogaster	K17108	3.2.1.45		0	0	0	0	0	0	0	0	0	0	0.00365631	0
D2H9R8_AILME Putative uncharacterized protein (Fragment) OS=Ailuropoda melanoleuca GN=PANDA_007093 PE=3 SV=1	Mammalia	K01203	3.2.1.48 3.2.1.10		0.541859	0.652184	0.914918	0.71335	0.62022	0.624879	0.00995867	0.00631014	0.00865239	0.0404085	0.0585009	0.0650693
STRH_STRPN Beta-N-acetylhexosaminidase OS=Streptococcus pneumoniae serotype 4 (strain ATCC BAA-334 / TIGR4) GN=strH PE=1 SV=2	Streptococcus pneumoniae TIGR4	K12373	3.2.1.52		0	0	0	0	0	0	0	0	0	0	0.00365631	0
PGLX2_EMENI Exopolygalacturonase X-2 OS=Emericella nidulans (strain FGSC A4 / ATCC 38163 / CBS 112.46 / NRRL 194 / M139) GN=pgaX-2 PE=2 SV=1	Aspergillus nidulans FGSC A4	K01213	3.2.1.67		0	0	0	0	0	0	0	0	0	0	0	0
XYND_GIBZE Endo-1,4-beta-xylanase D OS=Gibberella zeae (strain PH-1 / ATCC MYA-4620 / FGSC 9075 / NRRL 31084) GN=XYLD PE=1 SV=1	Fusarium graminearum PH-1	K01181	3.2.1.8		0	0	0	0	0	0	0	0	0	0	0	0
MG: Aryl-phospho-beta-D-glucosidase BglH OS=Bacillus subtilis (strain 168) GN=bglH PE=1 SV=2 [P40740] Score: 491.0	Bacillus subtilis subsp. subtilis str. 168	K01223	3.2.1.86		0	0	0	0	0	0	0.00497934	0.00315507	0.0043262	0.0036735	0.00365631	0
MG: 6-phospho-beta-glucosidase BglA OS=Escherichia coli (strain K12) GN=bglA PE=1 SV=2 [Q46829] Score: 553.0	Bacteria	K01223	3.2.1.86		0	0	0	0	0	0	0	0.00315507	0	0.0036735	0.00365631	0.0038276
ENASE_MOUSE Cytosolic endo-beta-N-acetylglucosaminidase OS=Mus musculus GN=Engase PE=1 SV=1	Mus musculus	K01227	3.2.1.96		0	0	0	0	0	0	0	0	0	0	0	0
DML3_ARATH DEMETER-like protein 3 OS=Arabidopsis thaliana GN=DML3 PE=2 SV=2	Arabidopsis thaliana	-	3.2.2.-		0.00541859	0	0	0	0	0	0	0	0	0	0	0
FPG_BRASO Formamidopyrimidine-DNA glycosylase OS=Bradyrhizobium sp. (strain ORS278) GN=mutM PE=3 SV=1	Bradyrhizobium sp. ORS 278	K10563	3.2.2.23 4.2.99.18		0	0	0	0	0	0	0	0	0	0	0	0
UNG_NOCSJ Uracil-DNA glycosylase OS=Nocardioides sp. (strain BAA-499 / JS614) GN=ung PE=3 SV=1	Nocardioides sp. JS614	K03648	3.2.2.27		0	0	0	0	0	0	0	0	0	0	0	0
UNG_RALPJ Uracil-DNA glycosylase OS=Ralstonia pickettii (strain 12J) GN=ung PE=3 SV=1	Ralstonia pickettii 12J	K03648	3.2.2.27		0	0	0	0	0	0	0	0	0	0.0036735	0	0
SAHH_SULSO Adenosylhomocysteinase OS=Sulfolobus solfataricus (strain ATCC 35092 / DSM 1617 / JCM 11322 / P2) GN=ahcY PE=3 SV=1	Sulfolobus solfataricus P2	K01251	3.3.1.1		0	0.00469197	0	0	0	0	0	0	0	0	0	0
SAHH_BORPE Adenosylhomocysteinase OS=Bordetella pertussis (strain Tohama I / ATCC BAA-589 / NCTC 13251) GN=ahcY PE=3 SV=1	Proteobacteria	K01251	3.3.1.1		0	0	0	0	0.00466331	0.00473393	0	0	0	0	0	0
SAHH2_RAT Adenosylhomocysteinase 2 OS=Rattus norvegicus GN=Ahcyl1 PE=1 SV=2	Mammalia	K01251	3.3.1.1		0.0162558	0.0140759	0	0.00466242	0.0139899	0.00473393	0	0	0	0	0	0
SAHH3_HUMAN Adenosylhomocysteinase 3 OS=Homo sapiens GN=AHCYL2 PE=1 SV=1	Mammalia	K01251	3.3.1.1		0.0162558	0.0140759	0	0.00466242	0.0139899	0.00473393	0	0	0	0	0	0
SAHH_WHEAT Adenosylhomocysteinase OS=Triticum aestivum GN=SAHH PE=2 SV=1	Streptophyta	-	3.3.1.1		0	0	0	0	0	0	0	0	0	0	0	0
LKHA4_ORYSJ Leukotriene A-4 hydrolase homolog OS=Oryza sativa subsp. japonica GN=LKHA4 PE=2 SV=1	Oryza sativa Japonica Group	K01254	3.3.2.6		0	0	0	0	0	0	0	0	0	0	0	0
MG: Uncharacterized peptidase MW1651 OS=Staphylococcus aureus (strain MW2) GN=MW1651 PE=3 SV=1 [Q8NW55] Score: 212.0	Staphylococcus aureus subsp. aureus MW2	-	3.4.-.-		0	0	0	0	0	0	0	0	0.0043262	0	0	0
PEPDA_LACHE Dipeptidase A OS=Lactobacillus helveticus GN=pepDA PE=1 SV=1	Lactobacillus helveticus	-	3.4.-.-		0	0	0	0	0	0	0	0	0	0	0	0
PEPDA_STRP3 Probable dipeptidase A OS=Streptococcus pyogenes serotype M3 (strain ATCC BAA-595 / MGAS315) GN=pepDA PE=3 SV=1	Streptococcus pyogenes	K08659	3.4.-.-		0	0	0	0	0	0	0	0	0	0	0	0
PRSW_PEPD6 Protease PrsW OS=Peptoclostridium difficile (strain 630) GN=prsW PE=3 SV=1	Clostridium difficile 630	-	3.4.-.-		0	0	0	0	0	0	0	0	0	0	0	0
ERMP1_SCHPO Putative endoplasmic reticulum metallopeptidase 1 OS=Schizosaccharomyces pombe (strain 972 / ATCC 24843) GN=erm1 PE=3 SV=1	Schizosaccharomyces pombe 972h-	-	3.4.-.-		0	0	0	0	0	0	0	0	0	0	0	0
DCD_HUMAN Dermcidin OS=Homo sapiens GN=DCD PE=1 SV=2	Homo sapiens	-	3.4.-.-		0.0108372	0.00469197	0.0111575	0	0.00932662	0.00473393	0	0	0	0	0	0
G1MFM7_AILME Uncharacterized protein OS=Ailuropoda melanoleuca GN=CLCA1 PE=4 SV=1	Mammalia	K05027	3.4.-.-		0.400975	0.464505	0.401671	0.456917	0.382391	0.454457	0	0	0	0.007347	0.00731261	0.0114828
CLCA2_HUMAN Calcium-activated chloride channel regulator 2 OS=Homo sapiens GN=CLCA2 PE=1 SV=2	Mammalia	K05028	3.4.-.-		0.0379301	0.0328438	0.0334726	0.0326369	0.0326432	0.0284036	0	0	0	0	0	0
CLCA1_PIG Calcium-activated chloride channel regulator 1 OS=Sus scrofa GN=CLCA1 PE=2 SV=1	Mammalia	K05027	3.4.-.-		0.11379	0.112607	0.0948391	0.107236	0.102593	0.104146	0	0	0	0	0	0
ERP1A_CAEEL Putative endoplasmic reticulum metallopeptidase 1-A OS=Caenorhabditis elegans GN=B0495.7 PE=1 SV=2	Caenorhabditis elegans	-	3.4.-.-		0.0162558	0.0140759	0.0111575	0.00466242	0.00932662	0.0142018	0.0199173	0.00946522	0.00865239	0.014694	0.00365631	0.0153104
MVP_BTMV P3N-PIPO polyprotein OS=Beet mosaic virus PE=3 SV=2	Beet mosaic virus	-	3.4.-.- 3.4.22.45		0	0	0	0	0	0	0	0	0	0	0	0
POLG_BTMV Genome polyprotein OS=Beet mosaic virus PE=3 SV=1	Beet mosaic virus	-	3.4.-.- 3.4.22.45 3.6.4.- 3.4.22.44 2.7.7.48		0	0	0	0	0	0	0	0	0	0	0	0
POLG_TUMVQ Genome polyprotein OS=Turnip mosaic virus (strain Quebec) PE=1 SV=2	Turnip mosaic virus (strain Quebec)	-	3.4.-.- 3.4.22.45 3.6.4.- 3.4.22.44 2.7.7.48		0	0	0	0	0	0	0	0	0	0.0036735	0	0
MG: Putative aminopeptidase YsdC OS=Bacillus subtilis (strain 168) GN=ysdC PE=1 SV=1 [P94521] Score: 125.0	Bacillus subtilis subsp. subtilis str. 168	K01179	3.4.11.-		0.00541859	0	0	0	0.00466331	0	0	0	0	0	0	0
MG: Probable M18 family aminopeptidase 1 OS=Clostridium acetobutylicum (strain ATCC 824 / DSM 792 / JCM 1419 / LMG 5710 / VKM B-1787) GN=apeA PE=1 SV=1 [Q97K30] Score: 663.0	Clostridium acetobutylicum ATCC 824	-	3.4.11.-		0	0	0	0	0	0	0.00497934	0	0.0043262	0.0036735	0.00365631	0.0038276
MG: Probable M18 family aminopeptidase 2 OS=Clostridium acetobutylicum (strain ATCC 824 / DSM 792 / JCM 1419 / LMG 5710 / VKM B-1787) GN=apeB PE=3 SV=1 [Q97LF4] Score: 549.0	Clostridium	K01267	3.4.11.-		0	0.00469197	0	0	0.00466331	0	0	0	0.0043262	0.0036735	0	0.0038276
LPQL_MYCTU Probable lipoprotein aminopeptidase LpqL OS=Mycobacterium tuberculosis (strain ATCC 25618 / H37Rv) GN=lpqL PE=1 SV=1	Mycobacterium tuberculosis H37Rv	-	3.4.11.1		0	0	0	0	0	0	0	0	0	0	0	0
AMPA_CHLMU Probable cytosol aminopeptidase OS=Chlamydia muridarum (strain MoPn / Nigg) GN=pepA PE=3 SV=2	Chlamydia	K01255	3.4.11.1 3.4.11.10		0.0541859	0.0234599	0.0111575	0.0512866	0.0419698	0.0189357	0	0	0	0	0.00365631	0
AMPN_LACDL Aminopeptidase N OS=Lactobacillus delbrueckii subsp. lactis GN=pepN PE=1 SV=3	Lactobacillales	-	3.4.11.2		0	0	0	0	0	0	0	0	0	0	0	0
AMPN_LACLL Aminopeptidase N OS=Lactococcus lactis subsp. lactis GN=pepN PE=1 SV=2	Lactobacillales	-	3.4.11.2		0	0	0	0	0	0	0	0	0	0	0	0
DNPEP_BOVIN Aspartyl aminopeptidase OS=Bos taurus GN=DNPEP PE=1 SV=1	Bos taurus	K01267	3.4.11.21		0	0	0	0	0	0	0	0	0	0.0036735	0	0
PEPT_BACSU Peptidase T OS=Bacillus subtilis (strain 168) GN=pepT PE=3 SV=1	Bacillus subtilis subsp. subtilis str. 168	K01258	3.4.11.4		0	0	0	0	0	0	0	0	0	0	0	0
PEPT_LACSS Peptidase T OS=Lactobacillus sakei subsp. sakei (strain 23K) GN=pepT PE=3 SV=1	Lactobacillus sakei subsp. sakei 23K	K01258	3.4.11.4		0	0	0	0	0	0	0	0	0	0	0.00365631	0
PIP_ELIME Proline iminopeptidase OS=Elizabethkingia meningoseptica GN=fpaP PE=1 SV=1	Elizabethkingia meningoseptica	-	3.4.11.5		0	0	0	0	0	0	0	0	0	0	0	0
PIP_XYLFA Proline iminopeptidase OS=Xylella fastidiosa (strain 9a5c) GN=pip PE=3 SV=1	Xylella fastidiosa	K01259	3.4.11.5		0	0	0	0	0	0	0	0.00315507	0	0	0	0
AMPE_MOUSE Glutamyl aminopeptidase OS=Mus musculus GN=Enpep PE=1 SV=1	Mammalia	K11141	3.4.11.7		0	0	0.00557877	0	0	0	0	0	0	0	0	0
AMPP2_TALMQ Probable Xaa-Pro aminopeptidase PMAA_074180 OS=Talaromyces marneffei (strain ATCC 18224 / CBS 334.59 / QM 7333) GN=PMAA_074180 PE=3 SV=1	Talaromyces marneffei ATCC 18224	-	3.4.11.9		0	0	0	0	0	0	0	0	0	0.0036735	0	0
D2H9V5_AILME Putative uncharacterized protein (Fragment) OS=Ailuropoda melanoleuca GN=PANDA_007139 PE=3 SV=1	Mammalia	K14208	3.4.11.9		0.0270929	0.0234599	0.0334726	0.0326369	0.0233165	0.0378714	0	0	0	0	0	0
PEPD_ECOLI Cytosol non-specific dipeptidase OS=Escherichia coli (strain K12) GN=pepD PE=1 SV=3	Escherichia coli K-12	K01270	3.4.13.18		0	0.0140759	0.00557877	0.00932484	0.00466331	0.00946786	0.029876	0.0189304	0.0389358	0.0110205	0.0182815	0.0038276
PEPE_CITK8 Peptidase E OS=Citrobacter koseri (strain ATCC BAA-895 / CDC 4225-83 / SGSC4696) GN=pepE PE=3 SV=1	Enterobacteriaceae	K05995	3.4.13.21		0	0	0	0	0	0	0.00995867	0.00946522	0.0129786	0	0.00731261	0
PEPQ_LACHE Xaa-Pro dipeptidase OS=Lactobacillus helveticus GN=pepQ PE=3 SV=1	Lactobacillus helveticus	-	3.4.13.9		0	0	0	0	0	0	0	0	0	0	0	0
PEPD_HUMAN Xaa-Pro dipeptidase OS=Homo sapiens GN=PEPD PE=1 SV=3	Mammalia	K14213	3.4.13.9		0	0	0	0	0.00466331	0.00946786	0	0	0	0	0	0
PEPX_STRAW Putative Xaa-Pro dipeptidyl-peptidase OS=Streptomyces avermitilis (strain ATCC 31267 / DSM 46492 / JCM 5070 / NBRC 14893 / NCIMB 12804 / NRRL 8165 / MA-4680) GN=SAV_1674 PE=3 SV=1	Streptomyces avermitilis MA-4680	K01281	3.4.14.11		0	0	0	0	0	0	0	0	0	0.0036735	0	0
DPP3_NEMVE Dipeptidyl peptidase 3 OS=Nematostella vectensis GN=dpp3 PE=3 SV=1	Nematostella vectensis	K01277	3.4.14.4		0	0	0	0	0	0	0	0	0	0	0	0
DAPB_METAQ Probable dipeptidyl-aminopeptidase B OS=Metarhizium acridum (strain CQMa 102) GN=DAPB PE=3 SV=1	Metarhizium acridum CQMa 102	K01282	3.4.14.5		0	0	0	0	0	0	0	0	0	0	0	0
G1LG48_AILME Uncharacterized protein (Fragment) OS=Ailuropoda melanoleuca GN=DPP4 PE=4 SV=1	Mammalia	K01278	3.4.14.5		0.0108372	0.0234599	0.0613665	0.0186497	0.00932662	0.0189357	0	0	0	0	0	0
Y3137_VIBCH Putative carboxypeptidase VC_A0337 OS=Vibrio cholerae serotype O1 (strain ATCC 39315 / El Tor Inaba N16961) GN=VC_A0337 PE=3 SV=2	Vibrio cholerae O1 biovar El Tor str. N16961	-	3.4.16.-		0	0	0.00557877	0	0	0	0	0	0	0	0	0
SCP33_ARATH Serine carboxypeptidase-like 33 OS=Arabidopsis thaliana GN=SCPL33 PE=2 SV=2	Arabidopsis thaliana	K16297	3.4.16.-		0	0	0	0	0	0	0	0	0	0	0	0
CBPX_PEA Serine carboxypeptidase-like (Fragment) OS=Pisum sativum PE=2 SV=1	Streptophyta	-	3.4.16.-		0	0	0	0	0	0	0	0	0	0	0	0
DACA_BACSU D-alanyl-D-alanine carboxypeptidase DacA OS=Bacillus subtilis (strain 168) GN=dacA PE=1 SV=3	Bacillus subtilis subsp. subtilis str. 168	K07258	3.4.16.4		0	0	0	0	0	0	0	0	0	0	0	0
MG: D-alanyl-D-alanine carboxypeptidase DacB OS=Bacillus subtilis (strain 168) GN=dacB PE=1 SV=1 [P35150] Score: 108.0	Bacillus subtilis subsp. subtilis str. 168	K01286	3.4.16.4		0	0	0	0	0	0	0	0	0	0	0	0
DACF_BACSU D-alanyl-D-alanine carboxypeptidase DacF OS=Bacillus subtilis (strain 168) GN=dacF PE=2 SV=2	Bacillus subtilis subsp. subtilis str. 168	K07258	3.4.16.4		0	0	0	0	0	0	0	0	0	0	0	0
DACA_ECOL6 D-alanyl-D-alanine carboxypeptidase DacA OS=Escherichia coli O6:H1 (strain CFT073 / ATCC 700928 / UPEC) GN=dacA PE=3 SV=1	Escherichia coli	K07258	3.4.16.4		0	0	0	0	0	0	0	0	0	0	0	0
CBP1_ORYSJ Serine carboxypeptidase 1 OS=Oryza sativa subsp. japonica GN=CBP1 PE=2 SV=1	Oryza sativa Japonica Group	K16296	3.4.16.5		0	0	0	0	0	0	0	0	0	0	0	0
CBP3_HORVU Serine carboxypeptidase 3 OS=Hordeum vulgare GN=CBP3 PE=1 SV=2	Streptophyta	-	3.4.16.5		0	0	0	0	0	0	0	0	0	0	0	0
CBP21_HORVU Serine carboxypeptidase II-1 (Fragment) OS=Hordeum vulgare GN=CXP;2-1 PE=1 SV=1	Hordeum vulgare	-	3.4.16.6		0	0	0	0	0	0	0	0	0	0	0	0
CBP22_HORVU Serine carboxypeptidase II-2 (Fragment) OS=Hordeum vulgare GN=CXP;2-2 PE=1 SV=1	Hordeum vulgare	-	3.4.16.6		0	0	0	0	0	0	0	0	0	0	0	0
CBPQ_XENLA Carboxypeptidase Q OS=Xenopus laevis GN=cpq PE=2 SV=1	Xenopus laevis	K01302	3.4.17.-		0	0	0	0	0	0	0	0	0	0	0	0
CBPC4_HUMAN Cytosolic carboxypeptidase 4 OS=Homo sapiens GN=AGBL1 PE=1 SV=2	Homo sapiens	-	3.4.17.-		0	0	0	0	0	0	0	0	0	0	0	0
CBPA6_HUMAN Carboxypeptidase A6 OS=Homo sapiens GN=CPA6 PE=1 SV=2	Mammalia	K08782	3.4.17.-		0.0487673	0.0516117	0.0613665	0.0466242	0.0326432	0.0426054	0.00497934	0.00631014	0.00865239	0.0257145	0.0255941	0.0306208
CBPA1_RAT Carboxypeptidase A1 OS=Rattus norvegicus GN=Cpa1 PE=2 SV=2	Mammalia	K08779	3.4.17.1		0.68816	1.42636	0.959548	0.680713	0.457004	0.605943	0.199173	0.220855	0.190353	0.701638	0.884826	0.54352
CBPE_BOVIN Carboxypeptidase E OS=Bos taurus GN=CPE PE=1 SV=2	Bos taurus	K01294	3.4.17.10		0	0	0	0	0	0	0	0	0	0	0	0
CBPB1_RAT Carboxypeptidase B OS=Rattus norvegicus GN=Cpb1 PE=1 SV=1	Mammalia	K01291	3.4.17.2		1.18667	1.36067	1.0767	1.65982	1.20313	1.11721	0.124483	0.113583	0.0778715	0.271839	0.285192	0.355967
CBPB2_BOVIN Carboxypeptidase B2 OS=Bos taurus GN=CPB2 PE=1 SV=1	Mammalia	K01300	3.4.17.20		0.0812788	0.0797635	0.0669452	0.0606114	0.0652863	0.0520732	0	0	0	0.0036735	0.00365631	0
ACE2_PAGLA Angiotensin-converting enzyme 2 OS=Paguma larvata GN=ACE2 PE=1 SV=1	Mammalia	-	3.4.17.23		0	0.00469197	0	0	0	0	0	0	0	0	0	0
IADA_ECOLI Isoaspartyl dipeptidase OS=Escherichia coli (strain K12) GN=iadA PE=1 SV=1	Escherichia coli K-12	K01305	3.4.19.-		0	0	0	0	0	0	0	0	0	0	0	0
UBP16_HUMAN Ubiquitin carboxyl-terminal hydrolase 16 OS=Homo sapiens GN=USP16 PE=1 SV=1	Homo sapiens	K11844	3.4.19.12		0	0	0	0	0	0	0	0	0	0	0	0
OTU6A_HUMAN OTU domain-containing protein 6A OS=Homo sapiens GN=OTUD6A PE=1 SV=1	Homo sapiens	K18342	3.4.19.12		0	0	0	0	0	0	0	0	0	0	0	0
UBP7_CAEBR Ubiquitin carboxyl-terminal hydrolase 7 OS=Caenorhabditis briggsae GN=usp-7 PE=3 SV=1	Caenorhabditis briggsae	K11838	3.4.19.12		0	0	0.00557877	0	0	0	0	0	0	0	0	0
LTP_EHV1B Large tegument protein deneddylase OS=Equine herpesvirus 1 (strain Ab4p) GN=24 PE=3 SV=1	Equine herpesvirus type 1 (strain AB4P)	-	3.4.19.12 3.4.22.-		0	0	0	0	0	0	0	0	0	0	0	0
PCP_VIBVY Pyrrolidone-carboxylate peptidase OS=Vibrio vulnificus (strain YJ016) GN=pcp PE=3 SV=1	Vibrio vulnificus	K01304	3.4.19.3		0	0	0	0	0	0	0	0	0	0	0.0109689	0
GGH_HUMAN Gamma-glutamyl hydrolase OS=Homo sapiens GN=GGH PE=1 SV=2	Mammalia	K01307	3.4.19.9		0	0	0	0	0	0	0	0	0	0	0	0
WPRA_BACSU Cell wall-associated protease OS=Bacillus subtilis (strain 168) GN=wprA PE=1 SV=2	Bacillus subtilis subsp. subtilis str. 168	K13274	3.4.21.-		0	0	0.00557877	0	0	0	0	0	0	0	0	0
MG: ATP-dependent protease OS=Lactococcus lactis subsp. lactis PE=3 SV=1 [Q06715] Score: 45.1	Lactococcus lactis subsp. lactis	-	3.4.21.-		0	0	0	0	0	0	0	0	0	0	0	0
HBP_ECOLX Hemoglobin-binding protease hbp autotransporter OS=Escherichia coli GN=hbp PE=1 SV=1	Escherichia coli	K12684	3.4.21.-		0	0	0	0	0	0	0	0	0	0.0036735	0	0
PCSK9_COLGU Proprotein convertase subtilisin/kexin type 9 OS=Colobus guereza GN=PCSK9 PE=2 SV=1	Colobus guereza	-	3.4.21.-		0	0	0	0	0	0	0.00497934	0	0	0	0	0
APOA_HUMAN Apolipoprotein(a) OS=Homo sapiens GN=LPA PE=1 SV=1	Homo sapiens	-	3.4.21.-		0	0	0	0	0	0	0	0	0	0	0	0
PRS42_MOUSE Serine protease 42 OS=Mus musculus GN=Prss42 PE=2 SV=1	Mus musculus	-	3.4.21.-		0.00541859	0	0.0111575	0	0	0	0.00497934	0	0.0043262	0.0036735	0.00365631	0.00765521
TRFL_HUMAN Lactotransferrin OS=Homo sapiens GN=LTF PE=1 SV=6	Mammalia	K17283	3.4.21.-		0.065023	0.0891475	0.0278938	0.0652738	0.0746129	0.0852107	0	0	0	0	0	0
TRFL_BOVIN Lactotransferrin OS=Bos taurus GN=LTF PE=1 SV=2	Mammalia	K17283	3.4.21.-		0	0	0	0	0.0139899	0.00473393	0	0	0	0	0	0
BLI4_CAEEL Endoprotease bli-4 OS=Caenorhabditis elegans GN=bli-4 PE=2 SV=2	Caenorhabditis elegans	-	3.4.21.-		0	0	0	0	0	0	0	0	0.0043262	0	0	0
SBT43_ARATH Subtilisin-like protease SBT4.3 OS=Arabidopsis thaliana GN=SBT4.3 PE=3 SV=1	Arabidopsis thaliana	-	3.4.21.-		0	0	0	0.00466242	0	0	0	0	0	0	0	0
DEGP1_ARATH Protease Do-like 1, chloroplastic OS=Arabidopsis thaliana GN=DEGP1 PE=1 SV=2	Arabidopsis thaliana	-	3.4.21.-		0	0	0	0	0	0	0	0	0	0	0	0
G1M128_AILME Lon protease homolog (Fragment) OS=Ailuropoda melanoleuca GN=LONP1 PE=3 SV=1	root	-	3.4.21.-		0	0	0	0	0	0	0	0	0	0.0036735	0.00365631	0
MG: Carboxy-terminal-processing protease OS=Bartonella bacilliformis (strain ATCC 35685 / KC583) GN=ctpA PE=3 SV=1 [Q44879] Score: 97.4	Bartonella bacilliformis KC583	K03797	3.4.21.102		0	0	0	0	0	0	0	0	0.0043262	0	0	0
DEGP_SALTY Periplasmic serine endoprotease DegP OS=Salmonella typhimurium (strain LT2 / SGSC1412 / ATCC 700720) GN=degP PE=3 SV=1	Enterobacteriaceae	K04771	3.4.21.107		0	0	0	0	0	0	0	0	0	0	0	0
CTRC_BOVIN Chymotrypsin-C OS=Bos taurus GN=CTRC PE=1 SV=2	Mammalia	K01311	3.4.21.2		0.00541859	0.00469197	0.0111575	0	0	0.00473393	0.00497934	0	0.0043262	0.0110205	0.00365631	0.00765521
TRY1_CANLF Cationic trypsin OS=Canis lupus familiaris PE=2 SV=1	Metazoa	-	3.4.21.4		0.0162558	0.0234599	0.0781028	0.0139873	0.0186532	0.0142018	0.00497934	0.00315507	0.00865239	0.0183675	0.00365631	0.0153104
MG: Lon protease 1 OS=Thermus thermophilus (strain HB27 / ATCC BAA-163 / DSM 7039) GN=lon1 PE=3 SV=1 [Q72KS4] Score: 62.0	Thermus thermophilus HB27	K01338	3.4.21.53		0.00541859	0.00469197	0	0	0	0	0	0	0	0	0	0
LON_FRAP2 Lon protease OS=Francisella philomiragia subsp. philomiragia (strain ATCC 25017) GN=lon PE=3 SV=1	Francisella philomiragia subsp. philomiragia ATCC 25017	K01338	3.4.21.53		0	0	0	0	0	0	0	0	0	0	0	0
LEXA_PARP8 LexA repressor OS=Paraburkholderia phymatum (strain DSM 17167 / CIP 108236 / LMG 21445 / STM815) GN=lexA PE=3 SV=1	Burkholderia	K01356	3.4.21.88		0	0	0	0	0	0	0	0	0	0	0	0
LEXA_PARPJ LexA repressor OS=Paraburkholderia phytofirmans (strain DSM 17436 / LMG 22146 / PsJN) GN=lexA PE=3 SV=1	Burkholderia	K01356	3.4.21.88		0	0	0	0	0	0	0	0	0	0	0	0
CLPP2_ANAVT ATP-dependent Clp protease proteolytic subunit 2 OS=Anabaena variabilis (strain ATCC 29413 / PCC 7937) GN=clpP2 PE=3 SV=1	Anabaena variabilis ATCC 29413	K01358	3.4.21.92		0	0	0	0	0	0	0.00497934	0	0.0043262	0	0.00365631	0.0038276
CLPP_PEDPA ATP-dependent Clp protease proteolytic subunit OS=Pediococcus pentosaceus (strain ATCC 25745 / 183-1w) GN=clpP PE=3 SV=1	Pediococcus pentosaceus ATCC 25745	K01358	3.4.21.92		0	0	0	0	0	0	0	0	0	0	0	0
CLPP_STRA5 ATP-dependent Clp protease proteolytic subunit OS=Streptococcus agalactiae serotype V (strain ATCC BAA-611 / 2603 V/R) GN=clpP PE=3 SV=1	Streptococcus	K01358	3.4.21.92		0	0	0	0	0	0	0.00497934	0	0.0043262	0	0.00365631	0.0038276
CLPP_STRGC ATP-dependent Clp protease proteolytic subunit OS=Streptococcus gordonii (strain Challis / ATCC 35105 / BCRC 15272 / CH1 / DL1 / V288) GN=clpP PE=3 SV=1	Lactobacillales	K01358	3.4.21.92		0	0	0	0	0	0	0.00497934	0	0.0043262	0	0.00365631	0.0038276
CLPP_ANADE ATP-dependent Clp protease proteolytic subunit OS=Anaeromyxobacter dehalogenans (strain 2CP-C) GN=clpP PE=3 SV=1	Anaeromyxobacter	K01358	3.4.21.92		0	0	0	0	0	0	0.00497934	0	0.0043262	0	0.00365631	0.0038276
CLPP_SALSV ATP-dependent Clp protease proteolytic subunit OS=Salmonella schwarzengrund (strain CVM19633) GN=clpP PE=3 SV=1	Enterobacteriaceae	K01358	3.4.21.92		0	0	0	0.00466242	0.00932662	0	0	0	0.0043262	0	0	0
CLPP1_TREPA ATP-dependent Clp protease proteolytic subunit 1 OS=Treponema pallidum (strain Nichols) GN=clpP1 PE=3 SV=1	Bacteria	K01358	3.4.21.92		0	0	0	0	0	0	0.00497934	0	0.0043262	0	0.00365631	0.0038276
MG: ATP-dependent Clp protease proteolytic subunit OS=Clostridium botulinum (strain Alaska E43 / Type E3) GN=clpP PE=3 SV=1 [B2UX13] Score: 372.0	Bacteria	K01358	3.4.21.92		0	0	0	0	0	0	0.00497934	0	0.0043262	0	0.00365631	0.0038276
CLPP_YERPS ATP-dependent Clp protease proteolytic subunit OS=Yersinia pseudotuberculosis serotype I (strain IP32953) GN=clpP PE=3 SV=1	Bacteria	K01358	3.4.21.92		0	0	0	0	0	0	0	0	0.0043262	0	0.00365631	0.0038276
CLPP_DINSH ATP-dependent Clp protease proteolytic subunit OS=Dinoroseobacter shibae (strain DSM 16493 / NCIMB 14021 / DFL 12) GN=clpP PE=3 SV=1	root	K01358	3.4.21.92		0	0	0	0	0	0	0	0	0	0	0	0
CLPP_PELCD ATP-dependent Clp protease proteolytic subunit OS=Pelobacter carbinolicus (strain DSM 2380 / Gra Bd 1) GN=clpP PE=3 SV=1	root	K01358	3.4.21.92		0	0	0	0	0	0	0	0	0	0	0	0
CLPP2_ARATH ATP-dependent Clp protease proteolytic subunit 2, mitochondrial OS=Arabidopsis thaliana GN=CLPP2 PE=1 SV=1	root	K01358	3.4.21.92		0	0	0	0	0	0	0	0	0	0	0	0
CLPP1_SALRD ATP-dependent Clp protease proteolytic subunit 1 OS=Salinibacter ruber (strain DSM 13855 / M31) GN=clpP1 PE=3 SV=2	root	K01358	3.4.21.92		0	0	0	0	0	0	0	0	0	0	0	0
CLPP_BARHE ATP-dependent Clp protease proteolytic subunit OS=Bartonella henselae (strain ATCC 49882 / DSM 28221 / Houston 1) GN=clpP PE=3 SV=1	root	K01358	3.4.21.92		0	0	0	0	0	0	0	0	0	0	0	0
ATG4D_MOUSE Cysteine protease ATG4D OS=Mus musculus GN=Atg4d PE=1 SV=1	Mus musculus	K08342	3.4.22.-		0	0	0	0	0	0	0	0	0	0	0	0
ORYA_ORYSJ Oryzain alpha chain OS=Oryza sativa subsp. japonica GN=Os04g0650000 PE=1 SV=2	Oryza sativa Japonica Group	-	3.4.22.-		0	0	0	0	0	0	0	0	0	0	0	0
RD19B_ARATH Probable cysteine protease RD19B OS=Arabidopsis thaliana GN=RD19B PE=2 SV=2	Arabidopsis thaliana	K01373	3.4.22.-		0	0	0	0	0	0	0	0	0	0	0	0
CYSP_PEA Cysteine proteinase 15A OS=Pisum sativum PE=2 SV=1	Pisum sativum	-	3.4.22.-		0	0	0	0	0	0	0	0	0	0	0	0
RPOA_PRRS1 Replicase polyprotein 1ab OS=Porcine reproductive and respiratory syndrome virus (strain 16244B) GN=rep PE=3 SV=3	PRRSV 16244B	-	3.4.22.- 3.4.22.- 3.4.22.- 3.4.19.12 3.4.22.- 3.4.21.- 2.7.7.48 3.6.4.12 3.6.4.13		0	0	0	0	0	0	0	0	0	0	0	0.0038276
POLG_CXB6S Genome polyprotein OS=Coxsackievirus B6 (strain Schmitt) PE=1 SV=4	Coxsackievirus B6 (strain Schmitt)	-	3.4.22.29 3.6.1.15 3.4.22.28 3.4.22.28 2.7.7.48		0	0	0	0	0	0	0	0	0	0	0	0
PEPC_LACHE Aminopeptidase C OS=Lactobacillus helveticus GN=pepC PE=3 SV=1	Lactobacillus helveticus	-	3.4.22.40		0	0	0	0	0	0	0	0	0	0	0	0
PEPC_STRTR Aminopeptidase C OS=Streptococcus thermophilus GN=pepC PE=3 SV=1	Streptococcus thermophilus	-	3.4.22.40		0	0	0	0	0	0	0	0	0	0	0	0
BLMH_HUMAN Bleomycin hydrolase OS=Homo sapiens GN=BLMH PE=1 SV=1	Homo sapiens	K01372	3.4.22.40		0	0.00469197	0.0111575	0	0	0	0	0	0	0	0	0
POLG_BSTV1 Genome polyprotein OS=Brome streak virus (strain 11-Cal) PE=3 SV=1	Brome streak virus (strain 11-Cal)	-	3.4.22.45 3.6.4.- 3.4.22.44 2.7.7.48		0.00541859	0	0	0	0	0	0	0	0	0	0	0
KGP66_PORGN Lys-gingipain HG66 OS=Porphyromonas gingivalis GN=kgp PE=3 SV=1	Porphyromonas gingivalis	-	3.4.22.47		0	0	0	0	0	0	0	0	0	0	0	0
HYBD_ECOLI Hydrogenase 2 maturation protease OS=Escherichia coli (strain K12) GN=hybD PE=1 SV=2	Escherichia coli K-12	K03605	3.4.23.-		0	0	0	0	0	0	0	0	0	0	0	0
ASPR_CUCPE Aspartic proteinase OS=Cucurbita pepo PE=2 SV=1	Cucurbita pepo	-	3.4.23.-		0	0	0	0	0	0	0.00497934	0.00631014	0.0043262	0.0036735	0.00365631	0.00765521
LSPA_ACAM1 Lipoprotein signal peptidase OS=Acaryochloris marina (strain MBIC 11017) GN=lspA PE=3 SV=1	Acaryochloris marina MBIC11017	K03101	3.4.23.36		0	0	0	0	0	0	0	0	0	0	0	0
OMPT_ECOLI Protease 7 OS=Escherichia coli (strain K12) GN=ompT PE=1 SV=1	Escherichia coli K-12	K01355	3.4.23.49		0	0	0	0	0	0	0	0	0	0	0	0
FTSH_ROTMD ATP-dependent zinc metalloprotease FtsH OS=Rothia mucilaginosa (strain DY-18) GN=ftsH PE=3 SV=1	Rothia mucilaginosa DY-18	K03798	3.4.24.-		0	0	0	0	0	0	0	0	0	0	0	0
MG: Uncharacterized zinc protease YmxG OS=Bacillus subtilis (strain 168) GN=ymxG PE=3 SV=3 [Q04805] Score: 292.0	Bacillus subtilis subsp. subtilis str. 168	-	3.4.24.-		0	0	0	0	0	0	0	0	0	0	0	0
MG: Oligoendopeptidase F homolog OS=Bacillus subtilis (strain 168) GN=yjbG PE=3 SV=2 [O31605] Score: 416.0	Bacillus subtilis subsp. subtilis str. 168	K08602	3.4.24.-		0	0	0	0	0	0	0	0	0.0043262	0	0	0
MG: Neutral endopeptidase OS=Lactococcus lactis subsp. lactis (strain IL1403) GN=pepO PE=1 SV=3 [Q07744] Score: 258.0	Lactococcus lactis subsp. lactis Il1403	K07386	3.4.24.-		0	0	0	0	0	0	0	0	0	0	0	0
MG: Putative zinc metalloproteinase in scaA 5'region (Fragment) OS=Streptococcus gordonii (strain Challis / ATCC 35105 / CH1 / DL1 / V288) PE=3 SV=1 [P42359] Score: 219.0	Streptococcus gordonii str. Challis substr. CH1	-	3.4.24.-		0	0	0	0	0	0	0	0	0	0	0	0
ZMPB_STRPN Zinc metalloprotease ZmpB OS=Streptococcus pneumoniae serotype 4 (strain ATCC BAA-334 / TIGR4) GN=zmpB PE=3 SV=2	Streptococcus pneumoniae TIGR4	K08643	3.4.24.-		0	0	0	0	0	0	0	0	0	0	0	0
FTSH_STRR6 ATP-dependent zinc metalloprotease FtsH OS=Streptococcus pneumoniae (strain ATCC BAA-255 / R6) GN=ftsH PE=3 SV=1	Lactobacillales	K03798	3.4.24.-		0	0	0	0	0	0	0	0	0	0	0	0
FTSH_LACPL ATP-dependent zinc metalloprotease FtsH OS=Lactobacillus plantarum (strain ATCC BAA-793 / NCIMB 8826 / WCFS1) GN=ftsH PE=2 SV=1	Lactobacillales	K03798	3.4.24.-		0	0	0	0	0	0	0	0.00631014	0	0	0	0
MG: ATP-dependent zinc metalloprotease FtsH OS=Clostridium novyi (strain NT) GN=ftsH PE=3 SV=1 [A0PXM8] Score: 451.0	Clostridium novyi NT	K03798	3.4.24.-		0	0	0	0	0	0	0	0.00315507	0	0	0	0
FTSH_STRM9 ATP-dependent zinc metalloprotease FtsH OS=Streptobacillus moniliformis (strain ATCC 14647 / DSM 12112 / NCTC 10651 / 9901) GN=ftsH PE=3 SV=1	Streptobacillus moniliformis DSM 12112	K03798	3.4.24.-		0	0	0	0	0	0	0	0.00631014	0	0	0	0
FTSH_CAUCN ATP-dependent zinc metalloprotease FtsH OS=Caulobacter crescentus (strain NA1000 / CB15N) GN=ftsH PE=2 SV=1	Caulobacter crescentus NA1000	K03798	3.4.24.-		0	0	0	0	0	0	0	0	0	0	0	0
HTPX_RHORT Protease HtpX homolog OS=Rhodospirillum rubrum (strain ATCC 11170 / ATH 1.1.1 / DSM 467 / LMG 4362 / NCIB 8255 / S1) GN=htpX PE=3 SV=1	Rhodospirillum rubrum ATCC 11170	K03799	3.4.24.-		0.00541859	0	0	0	0	0	0	0	0	0	0	0
FTSH_PELCD ATP-dependent zinc metalloprotease FtsH OS=Pelobacter carbinolicus (strain DSM 2380 / Gra Bd 1) GN=ftsH PE=3 SV=1	Pelobacter carbinolicus DSM 2380	K03798	3.4.24.-		0	0	0	0	0	0	0	0.00631014	0	0	0	0
HTPX_HELAH Protease HtpX homolog OS=Helicobacter acinonychis (strain Sheeba) GN=htpX PE=3 SV=1	Helicobacter acinonychis str. Sheeba	K03799	3.4.24.-		0	0	0	0	0	0	0	0	0	0	0	0
FTSH_MARHV ATP-dependent zinc metalloprotease FtsH OS=Marinobacter hydrocarbonoclasticus (strain ATCC 700491 / DSM 11845 / VT8) GN=ftsH PE=3 SV=1	Marinobacter aquaeolei VT8	K03798	3.4.24.-		0	0	0	0	0	0	0	0.00631014	0	0	0	0
HTPX_ERWT9 Protease HtpX OS=Erwinia tasmaniensis (strain DSM 17950 / CIP 109463 / Et1/99) GN=htpX PE=3 SV=1	Gammaproteobacteria	K03799	3.4.24.-		0	0	0	0	0	0	0	0	0	0	0	0
HTPX_ECOL6 Protease HtpX OS=Escherichia coli O6:H1 (strain CFT073 / ATCC 700928 / UPEC) GN=htpX PE=3 SV=1	Gammaproteobacteria	K03799	3.4.24.-		0	0	0	0	0	0	0	0	0	0	0	0
FTSH_BUCBP ATP-dependent zinc metalloprotease FtsH OS=Buchnera aphidicola subsp. Baizongia pistaciae (strain Bp) GN=ftsH PE=3 SV=1	Proteobacteria	K03798	3.4.24.-		0	0	0	0	0	0	0.00497934	0.00631014	0.0259572	0	0.00365631	0.0038276
FTSH_BUCAP ATP-dependent zinc metalloprotease FtsH OS=Buchnera aphidicola subsp. Schizaphis graminum (strain Sg) GN=ftsH PE=3 SV=1	Proteobacteria	K03798	3.4.24.-		0	0	0	0	0	0	0.00497934	0.00631014	0.0259572	0	0.00365631	0.0038276
FTSH_SHIFL ATP-dependent zinc metalloprotease FtsH OS=Shigella flexneri GN=ftsH PE=3 SV=1	Proteobacteria	K03798	3.4.24.-		0	0	0	0	0	0	0.00497934	0.00631014	0.0259572	0	0.00365631	0.0038276
G1L4B2_AILME Metalloendopeptidase (Fragment) OS=Ailuropoda melanoleuca GN=MEP1A PE=3 SV=1	Mammalia	-	3.4.24.-		0.0866974	0.0985314	0.0613665	0.121223	0.102593	0.0757429	0	0	0	0	0	0
MEP1B_RAT Meprin A subunit beta OS=Rattus norvegicus GN=Mep1b PE=1 SV=3	Mammalia	-	3.4.24.-		0.0541859	0.0563037	0.0446302	0.0652738	0.0512964	0.0615411	0	0	0	0	0	0
GON1_CAEEL A disintegrin and metalloproteinase with thrombospondin motifs gon-1 OS=Caenorhabditis elegans GN=gon-1 PE=1 SV=3	Caenorhabditis elegans	-	3.4.24.-		0	0	0	0	0	0.00473393	0	0	0	0	0	0
FTSH_CYAM1 ATP-dependent zinc metalloprotease FtsH OS=Cyanidioschyzon merolae (strain 10D) GN=ftsH PE=3 SV=1	Cyanidioschyzon merolae strain 10D	-	3.4.24.-		0	0	0	0	0	0	0.00497934	0	0	0	0	0
SPP_PEA Stromal processing peptidase, chloroplastic OS=Pisum sativum GN=SPP PE=1 SV=2	Pisum sativum	-	3.4.24.-		0	0	0	0	0	0	0	0.00631014	0	0.0036735	0	0
FTSH_POPEU ATP-dependent zinc metalloprotease FTSH, chloroplastic (Fragments) OS=Populus euphratica PE=1 SV=1	Streptophyta	-	3.4.24.-		0	0	0	0	0	0	0	0	0	0	0	0
FTSH8_ARATH ATP-dependent zinc metalloprotease FTSH 8, chloroplastic OS=Arabidopsis thaliana GN=FTSH8 PE=1 SV=1	Streptophyta	-	3.4.24.-		0	0	0	0	0	0	0	0	0	0	0	0
FTSH_LEPBD ATP-dependent zinc metalloprotease FtsH OS=Leptotrichia buccalis (strain ATCC 14201 / DSM 1135 / JCM 12969 / NCTC 10249 / C-1013-b) GN=ftsH PE=3 SV=1	root	K03798	3.4.24.-		0	0	0	0	0	0	0	0	0	0	0	0
FTSH1_ARATH ATP-dependent zinc metalloprotease FTSH 1, chloroplastic OS=Arabidopsis thaliana GN=FTSH1 PE=1 SV=2	root	K03798	3.4.24.-		0	0	0	0	0	0	0	0	0	0	0	0
FTSH_CAPAN ATP-dependent zinc metalloprotease FTSH, chloroplastic (Fragment) OS=Capsicum annuum GN=FTSH PE=2 SV=1	root	K03798	3.4.24.-		0	0	0	0	0	0	0	0	0	0	0	0
BMP1_MOUSE Bone morphogenetic protein 1 OS=Mus musculus GN=Bmp1 PE=1 SV=2	Mus musculus	K05502	3.4.24.19		0	0	0.00557877	0	0	0	0	0	0	0	0	0
PMIP_USTMA Mitochondrial intermediate peptidase OS=Ustilago maydis (strain 521 / FGSC 9021) GN=OCT1 PE=3 SV=3	Ustilago maydis 521	K01410	3.4.24.59		0	0	0	0	0	0	0	0	0	0	0	0
MG: Oligopeptidase A OS=Escherichia coli (strain K12) GN=prlC PE=3 SV=3 [P27298] Score: 447.0	Escherichia coli K-12	K01414	3.4.24.70		0	0	0	0	0	0	0.00995867	0.00631014	0.00865239	0	0	0
MG: Germination protease OS=Clostridium perfringens (strain ATCC 13124 / DSM 756 / JCM 1290 / NCIMB 6125 / NCTC 8237 / Type A) GN=gpr PE=3 SV=1 [Q0TNR9] Score: 456.0	Clostridium perfringens ATCC 13124	K06012	3.4.24.78		0	0	0	0	0	0	0	0	0.0043262	0	0	0
PSB9_HUMAN Proteasome subunit beta type-9 OS=Homo sapiens GN=PSMB9 PE=1 SV=2	Homo sapiens	K02741	3.4.25.1		0	0	0	0	0	0	0	0.00315507	0	0	0	0
PSB5_DICDI Proteasome subunit beta type-5 OS=Dictyostelium discoideum GN=psmB5 PE=1 SV=1	Dictyostelium discoideum	K02737	3.4.25.1		0	0	0	0	0	0	0.00497934	0	0	0	0.00365631	0
PSA2_ORYSJ Proteasome subunit alpha type-2 OS=Oryza sativa subsp. japonica GN=PAB1 PE=2 SV=1	Oryza sativa	-	3.4.25.1		0	0	0	0	0	0	0	0	0	0	0	0
HSLV_SERP5 ATP-dependent protease subunit HslV OS=Serratia proteamaculans (strain 568) GN=hslV PE=3 SV=1	Enterobacteriaceae	K01419	3.4.25.2		0	0	0	0.00466242	0	0	0	0	0	0	0	0
HSLV_ECO24 ATP-dependent protease subunit HslV OS=Escherichia coli O139:H28 (strain E24377A / ETEC) GN=hslV PE=3 SV=1	Enterobacteriaceae	K01419	3.4.25.2		0	0	0	0.00466242	0	0	0	0	0	0	0	0
HSLV_HAEDU ATP-dependent protease subunit HslV OS=Haemophilus ducreyi (strain 35000HP / ATCC 700724) GN=hslV PE=3 SV=3	Pasteurellaceae	K01419	3.4.25.2		0	0	0	0	0	0	0	0	0	0	0	0
HSLV_ACTSZ ATP-dependent protease subunit HslV OS=Actinobacillus succinogenes (strain ATCC 55618 / 130Z) GN=hslV PE=3 SV=1	Pasteurellaceae	K01419	3.4.25.2		0	0	0	0	0	0	0	0	0	0	0	0
MG: Putative amidohydrolase YtcJ OS=Bacillus subtilis (strain 168) GN=ytcJ PE=4 SV=1 [O34355] Score: 117.0	Bacillus subtilis subsp. subtilis str. 168	K07047	3.5.-.-		0	0	0	0	0	0	0	0	0.0043262	0	0	0
MG: PTS-dependent dihydroxyacetone kinase, phosphotransferase subunit DhaM OS=Escherichia coli (strain K12) GN=dhaM PE=1 SV=3 [P37349] Score: 82.0	Escherichia coli K-12	K05881	3.5.1.-		0	0	0	0	0	0	0	0	0	0	0	0
SIR1_MOUSE NAD-dependent protein deacetylase sirtuin-1 OS=Mus musculus GN=Sirt1 PE=1 SV=2	Mus musculus	K11411	3.5.1.-		0	0.00469197	0	0	0	0	0	0	0	0	0	0
YDJC_VIBC3 Carbohydrate deacetylase OS=Vibrio cholerae serotype O1 (strain ATCC 39541 / Classical Ogawa 395 / O395) GN=VC0395_A0904 PE=3 SV=1	root	K03478	3.5.1.-		0	0.00469197	0	0.00466242	0	0.00946786	0	0	0	0	0	0
MG: L-asparaginase 2 OS=Escherichia coli (strain K12) GN=ansB PE=1 SV=2 [P00805] Score: 536.0	Escherichia coli K-12	K01424	3.5.1.1		0	0.00469197	0	0.0186497	0.0186532	0.0236696	0.029876	0.044171	0.021631	0.0110205	0.0219378	0.0267932
MSHB_ACIC1 1D-myo-inositol 2-acetamido-2-deoxy-alpha-D-glucopyranoside deacetylase OS=Acidothermus cellulolyticus (strain ATCC 43068 / 11B) GN=mshB PE=3 SV=1	Acidothermus cellulolyticus 11B	K15525	3.5.1.103		0	0	0	0	0	0	0	0	0.0043262	0	0	0
DAPE_GLUOX Succinyl-diaminopimelate desuccinylase OS=Gluconobacter oxydans (strain 621H) GN=dapE PE=3 SV=2	Gluconobacter oxydans 621H	K01439	3.5.1.18		0	0	0	0	0	0	0	0	0	0	0	0
DAPE_POLNS Succinyl-diaminopimelate desuccinylase OS=Polynucleobacter necessarius subsp. necessarius (strain STIR1) GN=dapE PE=3 SV=1	Polynucleobacter necessarius subsp. necessarius STIR1	K01439	3.5.1.18		0	0	0	0	0	0	0	0	0	0	0	0
ASAH1_BOVIN Acid ceramidase OS=Bos taurus GN=ASAH1 PE=2 SV=3	Bos taurus	K12348	3.5.1.23		0	0	0	0	0	0	0	0	0	0	0	0
NCASE_ORYSJ Neutral ceramidase OS=Oryza sativa subsp. japonica GN=Os01g0624000 PE=1 SV=1	Oryza sativa Japonica Group	K12349	3.5.1.23		0	0	0	0	0	0	0	0	0	0	0	0
MG: N-acetylmuramoyl-L-alanine amidase CwlA OS=Bacillus subtilis (strain 168) GN=cwlA PE=1 SV=1 [P24808] Score: 191.0	Bacillus subtilis subsp. subtilis str. 168	K01447	3.5.1.28		0	0	0	0	0	0	0	0	0	0	0	0
NIT2B_XENLA Omega-amidase NIT2-B OS=Xenopus laevis GN=nit2b PE=2 SV=1	Xenopus laevis	K13566	3.5.1.3		0	0.00469197	0	0	0	0.00473393	0	0	0	0	0	0
CHED_DESHY Probable chemoreceptor glutamine deamidase CheD OS=Desulfitobacterium hafniense (strain Y51) GN=cheD PE=3 SV=1	Desulfitobacterium hafniense	K03411	3.5.1.44		0	0	0	0	0	0	0	0	0	0	0	0
DAPEL_STRTD N-acetyldiaminopimelate deacetylase OS=Streptococcus thermophilus (strain ATCC BAA-491 / LMD-9) GN=STER_1813 PE=3 SV=1	Streptococcus	K05823	3.5.1.47		0	0	0	0	0	0	0	0	0	0	0	0
URE1_LACFE Urease subunit alpha OS=Lactobacillus fermentum GN=ureC PE=3 SV=1	Lactobacillus fermentum	-	3.5.1.5		0	0	0	0	0	0	0	0	0	0	0	0
URE2_LACFE Urease subunit beta OS=Lactobacillus fermentum GN=ureB PE=3 SV=1	Lactobacillus fermentum	-	3.5.1.5		0	0	0	0	0	0	0	0	0	0	0	0
URE3_PSYIN Urease subunit gamma OS=Psychromonas ingrahamii (strain 37) GN=ureA PE=3 SV=1	Psychromonas ingrahamii 37	K01430	3.5.1.5		0	0	0	0	0	0	0	0	0	0	0	0
URE1_ACIAD Urease subunit alpha OS=Acinetobacter baylyi (strain ATCC 33305 / BD413 / ADP1) GN=ureC PE=3 SV=1	Proteobacteria	K01428	3.5.1.5		0	0	0	0.00466242	0.00466331	0.00946786	0	0	0	0	0	0
URE1_BACHD Urease subunit alpha OS=Bacillus halodurans (strain ATCC BAA-125 / DSM 18197 / FERM 7344 / JCM 9153 / C-125) GN=ureC PE=3 SV=1	Bacteria	K01428	3.5.1.5		0	0	0.00557877	0.00932484	0.00932662	0.0142018	0.0199173	0.0220855	0.0259572	0.022041	0.0146252	0.0229656
MG: Urease subunit alpha OS=Clostridium perfringens GN=ureC PE=3 SV=1 [P94669] Score: 474.0	Bacteria	K01428	3.5.1.5		0	0	0	0.00466242	0.00466331	0.00946786	0	0	0	0	0	0
URE1_PSEF5 Urease subunit alpha OS=Pseudomonas fluorescens (strain Pf-5 / ATCC BAA-477) GN=ureC PE=3 SV=1	Bacteria	K01428	3.5.1.5		0	0	0	0.00466242	0.00466331	0.00946786	0	0	0	0	0	0
URE1_CLOTH Urease subunit alpha OS=Clostridium thermocellum (strain ATCC 27405 / DSM 1237 / NBRC 103400 / NCIMB 10682 / NRRL B-4536 / VPI 7372) GN=ureC PE=3 SV=1	Bacteria	K01428	3.5.1.5		0	0	0	0.00466242	0.00466331	0.00946786	0	0	0	0	0	0
NGLY1_DROPS Peptide-N(4)-(N-acetyl-beta-glucosaminyl)asparagine amidase OS=Drosophila pseudoobscura pseudoobscura GN=PNGase PE=3 SV=2	Drosophila pseudoobscura pseudoobscura	K01456	3.5.1.52		0	0	0	0	0	0	0	0.00315507	0	0	0	0
PNG1_ORYSJ Peptide-N(4)-(N-acetyl-beta-glucosaminyl)asparagine amidase OS=Oryza sativa subsp. japonica GN=PNG1 PE=2 SV=1	Oryza sativa Japonica Group	K01456	3.5.1.52		0	0	0	0	0	0	0	0	0	0	0	0
DEF_ENTFA Peptide deformylase OS=Enterococcus faecalis (strain ATCC 700802 / V583) GN=def PE=1 SV=1	Lactobacillales	K01462	3.5.1.88		0	0	0	0	0	0	0	0	0	0	0	0
DEF_STRA3 Peptide deformylase OS=Streptococcus agalactiae serotype III (strain NEM316) GN=def PE=3 SV=1	Lactobacillales	K01462	3.5.1.88		0	0	0	0	0	0	0	0	0	0	0	0
MG: Peptide deformylase OS=Clostridium botulinum (strain Alaska E43 / Type E3) GN=def PE=3 SV=1 [B2V4B1] Score: 187.0	Clostridium botulinum E3 str. Alaska E43	K01462	3.5.1.88		0	0	0	0	0	0	0.00497934	0.00315507	0.0043262	0	0	0
DEF_DESOH Peptide deformylase OS=Desulfococcus oleovorans (strain DSM 6200 / Hxd3) GN=def PE=3 SV=1	Desulfococcus oleovorans Hxd3	K01462	3.5.1.88		0	0	0	0	0	0	0	0.00315507	0	0	0	0
DEF_SERP5 Peptide deformylase OS=Serratia proteamaculans (strain 568) GN=def PE=3 SV=1	Enterobacteriaceae	K01462	3.5.1.88		0	0	0	0	0	0	0	0	0	0	0	0
DEF_SALPK Peptide deformylase OS=Salmonella paratyphi A (strain AKU_12601) GN=def PE=3 SV=1	Enterobacteriaceae	K01462	3.5.1.88		0	0	0	0	0	0	0	0	0	0	0	0
DEF_PECCP Peptide deformylase OS=Pectobacterium carotovorum subsp. carotovorum (strain PC1) GN=def PE=3 SV=1	Enterobacteriaceae	K01462	3.5.1.88		0	0	0	0	0	0	0	0	0	0	0	0
ASTE_BURXL Succinylglutamate desuccinylase OS=Burkholderia xenovorans (strain LB400) GN=astE PE=3 SV=1	Burkholderia xenovorans LB400	K05526	3.5.1.96		0	0	0	0	0	0	0	0	0	0	0	0
ASTE_VIBVU Succinylglutamate desuccinylase OS=Vibrio vulnificus (strain CMCP6) GN=astE PE=3 SV=2	Vibrio vulnificus CMCP6	K05526	3.5.1.96		0	0	0	0	0	0	0	0	0	0	0	0
PYRC_GEOUR Dihydroorotase OS=Geobacter uraniireducens (strain Rf4) GN=pyrC PE=3 SV=1	Geobacter uraniireducens Rf4	K01465	3.5.2.3		0	0	0	0	0	0	0	0	0	0	0	0.0038276
HUTI_GEOTN Imidazolonepropionase OS=Geobacillus thermodenitrificans (strain NG80-2) GN=hutI PE=3 SV=1	Geobacillus thermodenitrificans NG80-2	K01468	3.5.2.7		0	0	0	0	0.00466331	0	0	0	0	0	0	0
ARGI1_HUMAN Arginase-1 OS=Homo sapiens GN=ARG1 PE=1 SV=2	Homo sapiens	K01476	3.5.3.1		0	0	0	0	0	0	0	0	0	0	0	0
ARCA_LACRD Arginine deiminase OS=Lactobacillus reuteri (strain DSM 20016) GN=arcA PE=3 SV=1	Lactobacillus reuteri	K01478	3.5.3.6		0	0	0	0	0	0	0	0	0	0	0	0
MG: Arginine deiminase OS=Pediococcus pentosaceus (strain ATCC 25745 / 183-1w) GN=arcA PE=3 SV=1 [Q03DS2] Score: 526.0	Lactobacillales	K01478	3.5.3.6		0.00541859	0.00469197	0	0	0	0	0	0	0	0	0	0
DCD_THEAC Probable deoxycytidine triphosphate deaminase OS=Thermoplasma acidophilum (strain ATCC 25905 / DSM 1728 / JCM 9062 / NBRC 15155 / AMRC-C165) GN=dcd PE=3 SV=2	Thermoplasma acidophilum DSM 1728	K01494	3.5.4.13		0	0	0	0	0	0	0	0	0	0	0	0
GCH1_SULSO GTP cyclohydrolase 1 OS=Sulfolobus solfataricus (strain ATCC 35092 / DSM 1617 / JCM 11322 / P2) GN=folE PE=3 SV=1	Sulfolobus	K01495	3.5.4.16		0	0	0	0	0	0	0	0	0	0	0	0
GCH1_CLONN GTP cyclohydrolase 1 OS=Clostridium novyi (strain NT) GN=folE PE=3 SV=1	Clostridium novyi NT	K01495	3.5.4.16		0	0	0	0	0	0	0	0	0	0	0	0
GCH1_ERWT9 GTP cyclohydrolase 1 OS=Erwinia tasmaniensis (strain DSM 17950 / CIP 109463 / Et1/99) GN=folE PE=3 SV=1	Erwinia tasmaniensis Et1/99	K01495	3.5.4.16		0	0	0	0	0	0	0	0	0	0	0.00365631	0
ADEC1_LACSS Adenine deaminase 1 OS=Lactobacillus sakei subsp. sakei (strain 23K) GN=ade1 PE=3 SV=1	Lactobacillus sakei subsp. sakei 23K	K01486	3.5.4.2		0	0	0	0	0	0	0	0	0.0043262	0	0	0
MG: Adenine deaminase OS=Clostridium perfringens (strain ATCC 13124 / DSM 756 / JCM 1290 / NCIMB 6125 / NCTC 8237 / Type A) GN=ade PE=3 SV=1 [Q0TR21] Score: 877.0	Firmicutes	K01486	3.5.4.2		0	0.00469197	0	0	0	0	0	0	0	0	0	0
ADEC_BRASB Adenine deaminase OS=Bradyrhizobium sp. (strain BTAi1 / ATCC BAA-1182) GN=ade PE=3 SV=1	Bradyrhizobium	K01486	3.5.4.2		0	0	0	0	0	0	0	0	0	0	0	0
ADEC_RUEPO Adenine deaminase OS=Ruegeria pomeroyi (strain ATCC 700808 / DSM 15171 / DSS-3) GN=ade PE=3 SV=2	Ruegeria pomeroyi DSS-3	K01486	3.5.4.2		0	0	0	0	0	0	0	0	0	0	0	0
RIBA_XYLFA GTP cyclohydrolase-2 OS=Xylella fastidiosa (strain 9a5c) GN=ribA PE=3 SV=1	Xylella fastidiosa 9a5c	K01497	3.5.4.25		0	0	0	0	0	0	0	0.00315507	0	0	0	0
RIBD_BACAM Riboflavin biosynthesis protein RibD OS=Bacillus amyloliquefaciens GN=ribD PE=3 SV=1	Bacillus amyloliquefaciens	-	3.5.4.26 1.1.1.193		0	0	0	0	0	0	0	0	0	0	0	0.0038276
MTAD_PYRFU 5-methylthioadenosine/S-adenosylhomocysteine deaminase OS=Pyrococcus furiosus (strain ATCC 43587 / DSM 3638 / JCM 8422 / Vc1) GN=mtaD PE=3 SV=1	Pyrococcus furiosus DSM 3638	K12960	3.5.4.28 3.5.4.31		0	0	0	0.00466242	0	0	0	0	0	0	0	0
ADA_HUMAN Adenosine deaminase OS=Homo sapiens GN=ADA PE=1 SV=3	Mammalia	K01488	3.5.4.4		0.00541859	0.00469197	0	0.00932484	0.00466331	0.00946786	0	0	0	0	0	0
ADA_RAT Adenosine deaminase OS=Rattus norvegicus GN=Ada PE=1 SV=3	Mammalia	K01488	3.5.4.4		0.0108372	0.0187679	0	0.0279745	0.0279799	0.0331375	0	0	0	0	0	0
CDD_SHIB3 Cytidine deaminase OS=Shigella boydii serotype 18 (strain CDC 3083-94 / BS512) GN=cdd PE=3 SV=1	Enterobacteriaceae	K01489	3.5.4.5		0	0	0	0	0	0	0.0248967	0.0220855	0.0302834	0.0036735	0.00731261	0
RIDA_SHIFL 2-iminobutanoate/2-iminopropanoate deaminase OS=Shigella flexneri GN=yjgF PE=3 SV=2	Enterobacteriaceae	K09022	3.5.99.10		0	0	0	0	0	0	0.00497934	0.00946522	0.0043262	0.0036735	0.00365631	0.00765521
MNME_LACAC tRNA modification GTPase MnmE OS=Lactobacillus acidophilus (strain ATCC 700396 / NCK56 / N2 / NCFM) GN=mnmE PE=3 SV=1	Lactobacillus acidophilus NCFM	K03650	3.6.-.-		0	0	0	0	0	0	0	0	0	0	0	0
MNME_CAMC1 tRNA modification GTPase MnmE OS=Campylobacter concisus (strain 13826) GN=mnmE PE=3 SV=1	Campylobacter concisus 13826	K03650	3.6.-.-		0	0	0	0	0	0	0	0	0	0	0	0
MNME_HAMD5 tRNA modification GTPase MnmE OS=Hamiltonella defensa subsp. Acyrthosiphon pisum (strain 5AT) GN=mnmE PE=3 SV=1	Candidatus Hamiltonella defensa 5AT (Acyrthosiphon pisum)	K03650	3.6.-.-		0	0	0	0	0	0	0	0	0	0	0	0
MNME_HAHCH tRNA modification GTPase MnmE OS=Hahella chejuensis (strain KCTC 2396) GN=mnmE PE=3 SV=1	Hahella chejuensis KCTC 2396	K03650	3.6.-.-		0	0	0	0	0	0	0.00497934	0	0	0	0.00365631	0
GET3_PODAN ATPase GET3 OS=Podospora anserina (strain S / ATCC MYA-4624 / DSM 980 / FGSC 10383) GN=GET3 PE=3 SV=1	Podospora anserina S mat+	K01551	3.6.-.-		0	0	0	0	0	0	0	0.00315507	0	0	0	0
ASNA_LEIIN ATPase ASNA1 homolog OS=Leishmania infantum GN=LinJ11.0710 PE=3 SV=1	Leishmania	K01551	3.6.-.-		0	0.00469197	0	0	0	0	0	0	0	0	0	0
NDX8_CAEEL Peroxisomal coenzyme A diphosphatase ndx-8 OS=Caenorhabditis elegans GN=ndx-8 PE=1 SV=1	Caenorhabditis elegans	-	3.6.1.-		0	0	0	0	0	0	0	0	0	0	0	0
PPAC_STRU0 Probable manganese-dependent inorganic pyrophosphatase OS=Streptococcus uberis (strain ATCC BAA-854 / 0140J) GN=ppaC PE=3 SV=1	Lactobacillales	K15986	3.6.1.1		0.0108372	0	0	0.00466242	0.00932662	0.00946786	0.00497934	0	0.0043262	0	0	0
HPPA_CARHZ K(+)-stimulated pyrophosphate-energized sodium pump OS=Carboxydothermus hydrogenoformans (strain ATCC BAA-161 / DSM 6008 / Z-2901) GN=hppA PE=1 SV=1	Carboxydothermus hydrogenoformans Z-2901	K15987	3.6.1.1		0	0	0	0	0	0	0	0	0	0	0	0
IPYR_ECOLI Inorganic pyrophosphatase OS=Escherichia coli (strain K12) GN=ppa PE=1 SV=2	Escherichia coli	K01507	3.6.1.1		0	0	0	0	0	0	0.00497934	0.00315507	0.0173048	0.0036735	0.00365631	0.0038276
IPYR_ECOL6 Inorganic pyrophosphatase OS=Escherichia coli O6:H1 (strain CFT073 / ATCC 700928 / UPEC) GN=ppa PE=3 SV=3	Escherichia coli CFT073	K01507	3.6.1.1		0.00541859	0.00938394	0	0.00932484	0.00932662	0.00946786	0	0	0	0	0	0
AVP1_ARATH Pyrophosphate-energized vacuolar membrane proton pump 1 OS=Arabidopsis thaliana GN=AVP1 PE=1 SV=1	Arabidopsis thaliana	K01507	3.6.1.1		0	0	0	0	0	0	0	0	0	0	0	0
TRPM2_HUMAN Transient receptor potential cation channel subfamily M member 2 OS=Homo sapiens GN=TRPM2 PE=1 SV=2	Homo sapiens	K04977	3.6.1.13		0	0	0	0	0	0	0.00995867	0	0	0	0	0
NTPTH_METAC Nucleoside-triphosphatase THEP1 OS=Methanosarcina acetivorans (strain ATCC 35395 / DSM 2834 / JCM 12185 / C2A) GN=MA_3402 PE=3 SV=2	Methanosarcina acetivorans C2A	K06928	3.6.1.15		0.00541859	0	0	0	0	0	0	0	0	0	0	0
ITPA_PODAN Inosine triphosphate pyrophosphatase OS=Podospora anserina (strain S / ATCC MYA-4624 / DSM 980 / FGSC 10383) GN=Pa_2_5430 PE=3 SV=2	Podospora anserina S mat+	K01519	3.6.1.19		0	0	0	0	0	0	0	0	0	0	0	0.0038276
NUDI_KLEP7 Nucleoside triphosphatase NudI OS=Klebsiella pneumoniae subsp. pneumoniae (strain ATCC 700721 / MGH 78578) GN=nudI PE=3 SV=2	Klebsiella pneumoniae subsp. pneumoniae MGH 78578	K12944	3.6.1.19 3.6.1.12 3.6.1.- 3.6.1.23		0.00541859	0	0	0	0	0	0	0	0	0	0	0
DUT_GEOBB Deoxyuridine 5-triphosphate nucleotidohydrolase OS=Geobacter bemidjiensis (strain Bem / ATCC BAA-1014 / DSM 16622) GN=dut PE=3 SV=1	Geobacter bemidjiensis Bem	K01520	3.6.1.23		0	0	0	0	0	0	0	0	0	0.0036735	0	0
UPPP_BACMF Undecaprenyl-diphosphatase OS=Bacillus methylotrophicus (strain DSM 23117 / BGSC 10A6 / FZB42) GN=uppP PE=3 SV=1	Bacillaceae	K06153	3.6.1.27		0	0.00469197	0	0	0.00466331	0.0189357	0.00497934	0.00315507	0	0.0036735	0.00365631	0
UPPP_THIDA Undecaprenyl-diphosphatase OS=Thiobacillus denitrificans (strain ATCC 25259) GN=uppP PE=3 SV=1	Thiobacillus denitrificans ATCC 25259	K06153	3.6.1.27		0	0	0	0	0	0	0	0	0	0.0036735	0	0
UPPP_MYXXD Undecaprenyl-diphosphatase OS=Myxococcus xanthus (strain DK 1622) GN=uppP PE=3 SV=1	Myxococcus xanthus DK 1622	K06153	3.6.1.27		0	0	0	0	0	0	0	0	0	0	0	0
MG: Stage IV sporulation protein A OS=Bacillus subtilis (strain 168) GN=spoIVA PE=1 SV=1 [P35149] Score: 495.0	Firmicutes	K06398	3.6.1.3		0	0	0	0	0	0	0.014938	0.0126203	0.0129786	0.0036735	0.00731261	0.00765521
MG: Stage IV sporulation protein A OS=Peptoclostridium difficile (strain 630) GN=spoIVA PE=1 SV=2 [Q182W3] Score: 527.0	Firmicutes	K06398	3.6.1.3		0	0	0	0	0	0	0.00995867	0.00631014	0.00865239	0.0036735	0.00731261	0.00765521
AATP4_ARATH AAA-ATPase At2g46620 OS=Arabidopsis thaliana GN=At2g46620 PE=2 SV=1	Arabidopsis thaliana	-	3.6.1.3		0	0	0	0	0	0	0	0	0	0	0	0
HIS2_STRTD Phosphoribosyl-ATP pyrophosphatase OS=Streptococcus thermophilus (strain ATCC BAA-491 / LMD-9) GN=hisE PE=3 SV=1	Streptococcus thermophilus LMD-9	K01523	3.6.1.31		0	0	0	0	0	0	0	0	0	0	0	0
HIS2_GEOLS Phosphoribosyl-ATP pyrophosphatase OS=Geobacter lovleyi (strain ATCC BAA-1151 / DSM 17278 / SZ) GN=hisE PE=3 SV=1	Geobacter lovleyi SZ	K01523	3.6.1.31		0	0	0	0	0	0	0	0	0	0	0	0
NUD18_RAT 8-oxo-dGDP phosphatase NUDT18 OS=Rattus norvegicus GN=Nudt18 PE=2 SV=2	Muridae	K17817	3.6.1.58		0	0	0	0	0	0	0	0	0	0	0	0
ENTP4_MOUSE Ectonucleoside triphosphate diphosphohydrolase 4 OS=Mus musculus GN=Entpd4 PE=1 SV=1	Mus musculus	K12305	3.6.1.6		0	0	0	0	0	0	0	0	0.0043262	0	0	0
ACYP_POLNA Acylphosphatase OS=Polaromonas naphthalenivorans (strain CJ2) GN=acyP PE=3 SV=1	Polaromonas naphthalenivorans CJ2	K01512	3.6.1.7		0	0	0	0	0.00466331	0.00473393	0	0	0	0	0	0.0038276
Y1572_METJA Putative ABC transporter ATP-binding protein MJ1572 OS=Methanocaldococcus jannaschii (strain ATCC 43067 / DSM 2661 / JAL-1 / JCM 10045 / NBRC 100440) GN=MJ1572 PE=3 SV=1	Methanocaldococcus jannaschii DSM 2661	K02006	3.6.3.-		0	0	0	0	0.00466331	0	0	0	0	0	0	0
MG: Uncharacterized ABC transporter ATP-binding protein YtlC OS=Bacillus subtilis (strain 168) GN=ytlC PE=3 SV=1 [O34314] Score: 241.0	Bacillus subtilis subsp. subtilis str. 168	K02049	3.6.3.-		0	0	0	0	0	0	0.00497934	0.00315507	0.0043262	0.0036735	0.00365631	0.0038276
MG: Maltodextrin import ATP-binding protein MsmX OS=Bacillus subtilis (strain 168) GN=msmX PE=3 SV=1 [P94360] Score: 355.0	Bacillus subtilis subsp. subtilis str. 168	K10112	3.6.3.-		0	0	0	0	0	0	0	0	0	0	0	0
YURJ_BACSU Uncharacterized ABC transporter ATP-binding protein YurJ OS=Bacillus subtilis (strain 168) GN=yurJ PE=3 SV=1	Bacillus subtilis subsp. subtilis str. 168	K10112	3.6.3.-		0	0	0	0	0	0	0	0	0	0	0	0
HMUV_RHIME Hemin import ATP-binding protein HmuV OS=Rhizobium meliloti (strain 1021) GN=hmuV PE=3 SV=1	Sinorhizobium meliloti 1021	K02013	3.6.3.-		0	0	0	0	0	0	0.00497934	0	0	0	0	0
LOLD_JANSC Lipoprotein-releasing system ATP-binding protein LolD OS=Jannaschia sp. (strain CCS1) GN=lolD PE=3 SV=1	Jannaschia sp. CCS1	K09810	3.6.3.-		0	0	0	0	0	0	0	0	0.0043262	0	0	0
MSBA_BORBR Lipid A export ATP-binding/permease protein MsbA OS=Bordetella bronchiseptica (strain ATCC BAA-588 / NCTC 13252 / RB50) GN=msbA PE=3 SV=2	Bordetella	K11085	3.6.3.-		0	0	0	0	0	0	0	0	0	0.0036735	0	0
SSUB_BURMA Aliphatic sulfonates import ATP-binding protein SsuB OS=Burkholderia mallei (strain ATCC 23344) GN=ssuB PE=3 SV=2	Burkholderia mallei ATCC 23344	K15555	3.6.3.-		0	0	0	0	0	0	0	0	0	0	0.00731261	0
LOLD_NEIG1 Lipoprotein-releasing system ATP-binding protein LolD OS=Neisseria gonorrhoeae (strain ATCC 700825 / FA 1090) GN=lolD PE=3 SV=1	Neisseria gonorrhoeae FA 1090	K09810	3.6.3.-		0	0	0	0	0	0	0	0	0	0	0	0
SSUB_ECOUT Aliphatic sulfonates import ATP-binding protein SsuB OS=Escherichia coli (strain UTI89 / UPEC) GN=ssuB PE=3 SV=1	Escherichia coli	K15555	3.6.3.-		0	0	0	0	0	0	0	0	0	0.0036735	0.00365631	0.00765521
LPTB_SHIFL Lipopolysaccharide export system ATP-binding protein LptB OS=Shigella flexneri GN=lptB PE=3 SV=2	Enterobacteriaceae	K06861	3.6.3.-		0	0	0	0	0	0	0.00995867	0	0.0043262	0	0	0
MACB2_PSEPF Macrolide export ATP-binding/permease protein MacB 2 OS=Pseudomonas fluorescens (strain Pf0-1) GN=macB2 PE=3 SV=1	Pseudomonas fluorescens Pf0-1	K05685	3.6.3.-		0	0	0	0	0	0	0	0	0	0	0	0
ATCL_MYCGE Probable cation-transporting P-type ATPase OS=Mycoplasma genitalium (strain ATCC 33530 / G-37 / NCTC 10195) GN=pacL PE=3 SV=1	Mycoplasma genitalium G37	K01537	3.6.3.-		0	0	0	0	0	0	0	0	0	0	0	0.0038276
MG: Lipid A export ATP-binding/permease protein MsbA OS=Saccharophagus degradans (strain 2-40 / ATCC 43961 / DSM 17024) GN=msbA PE=3 SV=1 [Q21NS8] Score: 124.0	Bacteria	K11085	3.6.3.-		0	0	0	0	0	0	0	0	0	0	0	0
TAT1_CAEEL Phospholipid-transporting ATPase tat-1 OS=Caenorhabditis elegans GN=tat-1 PE=3 SV=3	Caenorhabditis elegans	K14802	3.6.3.1		0	0	0	0	0	0	0	0	0	0	0	0
KDPB_RALSO Potassium-transporting ATPase ATP-binding subunit OS=Ralstonia solanacearum (strain GMI1000) GN=kdpB PE=3 SV=1	Ralstonia solanacearum GMI1000	K01547	3.6.3.12		0	0	0	0	0	0	0	0	0	0	0	0
VATA_HALWD V-type ATP synthase alpha chain OS=Haloquadratum walsbyi (strain DSM 16790 / HBSQ001) GN=atpA PE=3 SV=1	Haloquadratum walsbyi DSM 16790	K02117	3.6.3.14		0	0	0	0	0	0	0	0	0	0	0	0
MG: Flagellum-specific ATP synthase OS=Bacillus subtilis (strain 168) GN=fliI PE=3 SV=2 [P23445] Score: 462.0	Bacillus subtilis subsp. subtilis str. 168	K02412	3.6.3.14		0	0	0	0	0	0	0	0	0.0043262	0	0	0
VATA_STRP1 V-type ATP synthase alpha chain OS=Streptococcus pyogenes serotype M1 GN=atpA PE=3 SV=1	Streptococcus pyogenes serotype M1	K02117	3.6.3.14		0	0	0	0	0	0	0	0	0	0.0036735	0	0
ATPB_STRDO ATP synthase subunit beta (Fragment) OS=Streptococcus downei GN=atpD PE=3 SV=1	Lactobacillales	-	3.6.3.14		0	0	0	0	0	0	0	0	0	0	0	0
ATPB2_MYCPU ATP synthase subunit beta 2 OS=Mycoplasma pulmonis (strain UAB CTIP) GN=atpD2 PE=3 SV=1	Mycoplasma pulmonis UAB CTIP	-	3.6.3.14		0.00541859	0.00469197	0	0	0	0	0.014938	0.0220855	0.0129786	0.007347	0.00731261	0.0153104
ATPA_DICT6 ATP synthase subunit alpha OS=Dictyoglomus thermophilum (strain ATCC 35947 / DSM 3960 / H-6-12) GN=atpA PE=3 SV=1	Bacteria	K02111	3.6.3.14		0	0	0	0	0	0	0.00995867	0	0	0	0.00365631	0
ATPA2_PELCD ATP synthase subunit alpha 2 OS=Pelobacter carbinolicus (strain DSM 2380 / Gra Bd 1) GN=atpA2 PE=3 SV=1	Bacteria	K02111	3.6.3.14		0	0	0	0	0	0.00473393	0.0199173	0.00946522	0.0129786	0	0.00365631	0.00765521
VATA_CYACA V-type proton ATPase catalytic subunit A OS=Cyanidium caldarium PE=3 SV=1	Eukaryota	K02145	3.6.3.14		0	0	0	0	0	0	0	0	0	0	0	0
VATA_DAUCA V-type proton ATPase catalytic subunit A OS=Daucus carota PE=2 SV=1	Eukaryota	-	3.6.3.14		0	0	0	0	0	0	0	0	0	0	0	0
VATA_CANAL V-type proton ATPase catalytic subunit A OS=Candida albicans (strain SC5314 / ATCC MYA-2876) GN=TFP1 PE=1 SV=1	Eukaryota	K02145	3.6.3.14		0	0	0	0	0	0	0	0	0	0	0	0
ATPA_POPEU ATP synthase subunit alpha, chloroplastic (Fragments) OS=Populus euphratica GN=atpA PE=1 SV=2	Streptophyta	-	3.6.3.14		0	0	0	0	0	0	0	0	0	0	0	0
ATPA2_NITEC ATP synthase subunit alpha 2 OS=Nitrosomonas eutropha (strain C91) GN=atpA2 PE=3 SV=1	root	K02111	3.6.3.14		0	0	0	0	0	0	0.00995867	0.00315507	0.0043262	0	0.00365631	0.00765521
ATPA_BACTN ATP synthase subunit alpha OS=Bacteroides thetaiotaomicron (strain ATCC 29148 / DSM 2079 / NCTC 10582 / E50 / VPI-5482) GN=atpA PE=3 SV=1	root	K02111	3.6.3.14		0	0	0	0	0	0	0.00995867	0.00315507	0.0043262	0	0.00365631	0.00765521
ATPA_CARRP ATP synthase subunit alpha OS=Carsonella ruddii (strain PV) GN=atpA PE=3 SV=1	root	K02111	3.6.3.14		0	0	0	0	0	0	0.00995867	0.00315507	0.0043262	0	0.00365631	0.00765521
ATPA_CUPPJ ATP synthase subunit alpha OS=Cupriavidus pinatubonensis (strain JMP 134 / LMG 1197) GN=atpA PE=3 SV=1	root	-	3.6.3.14		0	0	0	0	0	0	0.0248967	0.0189304	0.021631	0.0036735	0.0109689	0.019138
ATPA_CHLVU ATP synthase subunit alpha, chloroplastic OS=Chlorella vulgaris GN=atpA PE=3 SV=1	root	-	3.6.3.14		0	0	0	0	0	0	0.00995867	0.00315507	0.0043262	0	0.00365631	0.00765521
ATPA_CITK8 ATP synthase subunit alpha OS=Citrobacter koseri (strain ATCC BAA-895 / CDC 4225-83 / SGSC4696) GN=atpA PE=3 SV=1	root	K02111	3.6.3.14		0	0	0	0.00466242	0	0.00473393	0.029876	0.0189304	0.0259572	0	0.00365631	0.00765521
ATPB_COXBU ATP synthase subunit beta OS=Coxiella burnetii (strain RSA 493 / Nine Mile phase I) GN=atpD PE=3 SV=1	root	K02112	3.6.3.14		0	0	0	0	0	0	0.00995867	0.00315507	0.0129786	0	0	0
ATPA_STRMU ATP synthase subunit alpha OS=Streptococcus mutans serotype c (strain ATCC 700610 / UA159) GN=atpA PE=3 SV=1	root	K02111	3.6.3.14		0.00541859	0	0.00557877	0	0	0.00473393	0.0248967	0.0189304	0.021631	0.0036735	0.0146252	0.019138
ATPB_CYAM1 ATP synthase subunit beta, chloroplastic OS=Cyanidioschyzon merolae (strain 10D) GN=atpB PE=3 SV=1	root	K02112	3.6.3.14		0.0325115	0.0375358	0	0.0233121	0.0233165	0.0142018	0.014938	0.0283956	0.0259572	0.007347	0.00731261	0.0153104
ATPBM_MAIZE ATP synthase subunit beta, mitochondrial OS=Zea mays GN=ATPB PE=2 SV=1	root	K02133	3.6.3.14		0.00541859	0.00469197	0	0	0	0	0.014938	0.0220855	0.0129786	0.007347	0.00731261	0.0153104
ATPB_ANTFO ATP synthase subunit beta, chloroplastic OS=Anthoceros formosae GN=atpB PE=2 SV=2	root	-	3.6.3.14		0.0325115	0.0375358	0	0.0233121	0.0233165	0.0142018	0.014938	0.0283956	0.0259572	0.007347	0.00731261	0.0153104
ATPB_DROME ATP synthase subunit beta, mitochondrial OS=Drosophila melanogaster GN=ATPsynbeta PE=1 SV=3	root	K02133	3.6.3.14		0	0	0	0	0	0	0	0	0	0	0	0
ATPB_MESAU ATP synthase subunit beta, mitochondrial (Fragment) OS=Mesocricetus auratus GN=ATP5B PE=1 SV=1	root	-	3.6.3.14		0	0	0	0	0	0	0	0	0	0	0	0
ATPB_PENGL ATP synthase subunit beta, mitochondrial (Fragments) OS=Penicillium glabrum GN=atp2 PE=1 SV=2	root	-	3.6.3.14		0	0	0	0	0	0	0	0	0	0	0	0
ATPB_HUMAN ATP synthase subunit beta, mitochondrial OS=Homo sapiens GN=ATP5B PE=1 SV=3	root	-	3.6.3.14		0.0108372	0.0140759	0	0	0	0	0.014938	0.0220855	0.0129786	0.007347	0.00731261	0.0153104
ATPB_PEPNI ATP synthase subunit beta (Fragment) OS=Peptococcus niger GN=atpD PE=3 SV=1	root	-	3.6.3.14		0	0	0	0	0	0	0	0	0	0	0	0
ATPB_NEUCR ATP synthase subunit beta, mitochondrial OS=Neurospora crassa (strain ATCC 24698 / 74-OR23-1A / CBS 708.71 / DSM 1257 / FGSC 987) GN=atp-2 PE=2 SV=1	root	K02112	3.6.3.14		0	0	0	0	0	0	0.00497934	0.00315507	0.0043262	0	0	0
ATPB_PARD8 ATP synthase subunit beta OS=Parabacteroides distasonis (strain ATCC 8503 / DSM 20701 / NCTC 11152) GN=atpD PE=3 SV=1	root	K02112	3.6.3.14		0.00541859	0.00469197	0	0	0	0	0.029876	0.044171	0.0259572	0.014694	0.0146252	0.0153104
ATPB_STAAM ATP synthase subunit beta OS=Staphylococcus aureus (strain Mu50 / ATCC 700699) GN=atpD PE=3 SV=1	root	K02112	3.6.3.14		0.0596044	0.0891475	0.0111575	0.0606114	0.0746129	0.0568072	0.124483	0.132513	0.121133	0.029388	0.0329068	0.0421037
ATPAM_BRANA ATP synthase subunit alpha, mitochondrial OS=Brassica napus GN=ATPA PE=3 SV=1	root	K02111	3.6.3.14		0	0	0	0	0	0	0.00995867	0.00315507	0.0043262	0	0.00365631	0.00765521
ATPA_BRUAB ATP synthase subunit alpha OS=Brucella abortus biovar 1 (strain 9-941) GN=atpA PE=3 SV=1	root	K02111	3.6.3.14		0.00541859	0	0.00557877	0.00466242	0	0.00946786	0.0348554	0.0283956	0.0346096	0.0036735	0.0146252	0.019138
ATPA_CLOPH ATP synthase subunit alpha OS=Clostridium phytofermentans (strain ATCC 700394 / DSM 18823 / ISDg) GN=atpA PE=3 SV=1	root	-	3.6.3.14		0.00541859	0	0.00557877	0	0	0.00473393	0.0248967	0.0189304	0.021631	0.0036735	0.0146252	0.019138
ATPB_IPOCC ATP synthase subunit beta, chloroplastic OS=Ipomoea coccinea GN=atpB PE=3 SV=1	root	K02133	3.6.3.14		0.0325115	0.0375358	0	0.0233121	0.0233165	0.0142018	0.029876	0.0504811	0.0389358	0.014694	0.0146252	0.0153104
ATPB_SOYBN ATP synthase subunit beta, chloroplastic OS=Glycine max GN=atpB PE=3 SV=1	root	-	3.6.3.14		0.0325115	0.0375358	0	0.0233121	0.0233165	0.0142018	0.014938	0.0283956	0.0259572	0.007347	0.00731261	0.0153104
ATPB_SCHPO ATP synthase subunit beta, mitochondrial OS=Schizosaccharomyces pombe (strain 972 / ATCC 24843) GN=atp2 PE=1 SV=1	root	K02112	3.6.3.14		0.0596044	0.0844555	0.0111575	0.055949	0.060623	0.0473393	0.0796694	0.0851869	0.0995025	0.029388	0.0219378	0.0153104
ATPB_ASPND ATP synthase subunit beta, chloroplastic (Fragment) OS=Asplenium nidus GN=atpB PE=3 SV=1	root	-	3.6.3.14		0.0270929	0.0328438	0	0.0233121	0.0233165	0.0142018	0	0.00631014	0.0129786	0	0	0
ATPB_OSMCI ATP synthase subunit beta, chloroplastic (Fragment) OS=Osmundastrum cinnamomeum GN=atpB PE=3 SV=1	root	-	3.6.3.14		0.0270929	0.0328438	0	0.0233121	0.0233165	0.0142018	0	0.00631014	0.0129786	0	0	0
ATPB_DROVI ATP synthase subunit beta, mitochondrial (Fragment) OS=Drosophila virilis GN=ATPsynbeta PE=3 SV=1	root	-	3.6.3.14		0	0	0	0	0	0	0	0	0	0	0	0
ATPA_NOCFA ATP synthase subunit alpha OS=Nocardia farcinica (strain IFM 10152) GN=atpA PE=3 SV=1	root	K02111	3.6.3.14		0	0	0	0	0	0	0	0	0	0	0	0
ATPB_SCHGA ATP synthase subunit beta, mitochondrial (Fragment) OS=Schizaphis graminum PE=3 SV=1	root	-	3.6.3.14		0	0	0	0	0	0	0	0	0	0	0	0
ATPBM_VITSX ATP synthase subunit beta, mitochondrial (Fragments) OS=Vitis sp. PE=1 SV=1	root	-	3.6.3.14		0	0	0	0	0	0	0	0	0	0	0	0
ATPB1_CHLTE ATP synthase subunit beta 1 OS=Chlorobium tepidum (strain ATCC 49652 / DSM 12025 / NBRC 103806 / TLS) GN=atpD1 PE=3 SV=1	root	K02112	3.6.3.14		0	0	0	0	0	0	0	0	0	0	0	0
ATPBM_ACTDE ATP synthase subunit beta, mitochondrial (Fragment) OS=Actinidia deliciosa GN=ATPB PE=2 SV=1	root	-	3.6.3.14		0	0	0	0	0	0	0	0	0	0	0	0
VATA_YEAST V-type proton ATPase catalytic subunit A OS=Saccharomyces cerevisiae (strain ATCC 204508 / S288c) GN=VMA1 PE=1 SV=3	Eukaryota	K02145	3.6.3.14 3.1.-.-		0	0	0	0	0	0	0	0	0	0	0	0
MG: L-arabinose transport ATP-binding protein AraG OS=Bacillus halodurans (strain ATCC BAA-125 / DSM 18197 / FERM 7344 / JCM 9153 / C-125) GN=araG PE=3 SV=1 [Q9K7C3] Score: 678.0	Bacillaceae	K10548	3.6.3.17		0	0	0	0	0	0	0.00497934	0.00315507	0.0043262	0.0036735	0.00365631	0.0038276
XYLG_BURCM Xylose import ATP-binding protein XylG OS=Burkholderia ambifaria (strain ATCC BAA-244 / AMMD) GN=xylG PE=3 SV=1	Burkholderia ambifaria AMMD	K10545	3.6.3.17		0	0	0	0	0	0	0	0	0	0	0	0
RBSA_PHOPR Ribose import ATP-binding protein RbsA OS=Photobacterium profundum (strain SS9) GN=rbsA PE=3 SV=1	Photobacterium profundum SS9	K10441	3.6.3.17		0	0	0	0	0	0	0	0	0	0.0036735	0	0
MG: Maltose/maltodextrin import ATP-binding protein MalK OS=Escherichia coli (strain UTI89 / UPEC) GN=malK PE=1 SV=2 [Q1R3Q1] Score: 396.0	Enterobacteriaceae	K10111	3.6.3.19		0	0	0	0	0	0	0	0	0	0	0	0
PSTB2_STRMU Phosphate import ATP-binding protein PstB 2 OS=Streptococcus mutans serotype c (strain ATCC 700610 / UA159) GN=pstB2 PE=3 SV=1	Streptococcus mutans UA159	K02036	3.6.3.27		0	0	0	0	0	0	0	0	0	0	0	0
PSTB1_STRR6 Phosphate import ATP-binding protein PstB 1 OS=Streptococcus pneumoniae (strain ATCC BAA-255 / R6) GN=pstB1 PE=3 SV=1	Streptococcus	K02036	3.6.3.27		0	0	0	0	0	0	0.00497934	0	0.0043262	0	0	0
PSTB1_LACPL Phosphate import ATP-binding protein PstB 1 OS=Lactobacillus plantarum (strain ATCC BAA-793 / NCIMB 8826 / WCFS1) GN=pstB1 PE=3 SV=1	Lactobacillales	K02036	3.6.3.27		0	0	0	0	0	0	0	0	0	0	0	0
PSTB1_STRT2 Phosphate import ATP-binding protein PstB 1 OS=Streptococcus thermophilus (strain ATCC BAA-250 / LMG 18311) GN=pstB1 PE=3 SV=1	Lactobacillales	K02036	3.6.3.27		0	0	0	0	0	0	0	0	0	0	0	0
PHNC_ANADE Phosphonates import ATP-binding protein PhnC OS=Anaeromyxobacter dehalogenans (strain 2CP-C) GN=phnC PE=3 SV=1	Anaeromyxobacter dehalogenans 2CP-C	K02041	3.6.3.28		0	0	0	0	0	0	0	0	0	0.0036735	0.00731261	0.0038276
FBPC2_RHOJR Fe(3+) ions import ATP-binding protein FbpC 2 OS=Rhodococcus jostii (strain RHA1) GN=fbpC2 PE=3 SV=1	Rhodococcus jostii RHA1	K02010	3.6.3.30		0	0	0	0	0	0	0	0	0	0	0	0
POTA_STRSV Spermidine/putrescine import ATP-binding protein PotA OS=Streptococcus sanguinis (strain SK36) GN=potA PE=3 SV=1	Streptococcus	K11072	3.6.3.31		0	0	0	0	0	0	0	0	0	0	0	0
POTA_STRTD Spermidine/putrescine import ATP-binding protein PotA OS=Streptococcus thermophilus (strain ATCC BAA-491 / LMD-9) GN=potA PE=3 SV=1	Streptococcus	K11072	3.6.3.31		0	0	0	0	0	0	0	0	0	0	0	0
CCMA2_CUPMC Cytochrome c biogenesis ATP-binding export protein CcmA 2 OS=Cupriavidus metallidurans (strain ATCC 43123 / DSM 2839 / NBRC 102507 / CH34) GN=ccmA2 PE=3 SV=1	Cupriavidus metallidurans CH34	K02193	3.6.3.41		0	0	0	0	0	0	0	0	0	0	0	0
MDLB_BUCAP Multidrug resistance-like ATP-binding protein MdlB OS=Buchnera aphidicola subsp. Schizaphis graminum (strain Sg) GN=mdlB PE=3 SV=1	Buchnera aphidicola str. Sg (Schizaphis graminum)	K06148	3.6.3.44		0	0	0	0	0	0	0	0	0	0	0	0
MDR1B_MOUSE Multidrug resistance protein 1B OS=Mus musculus GN=Abcb1b PE=1 SV=1	Mus musculus	K05658	3.6.3.44		0	0	0	0	0	0	0.00497934	0	0	0	0	0
ACA9_ARATH Calcium-transporting ATPase 9, plasma membrane-type OS=Arabidopsis thaliana GN=ACA9 PE=2 SV=2	Arabidopsis thaliana	K01537	3.6.3.8		0	0	0	0	0	0	0.00995867	0	0	0.0036735	0	0.00765521
MG: Putative ATP-dependent helicase IRC3 OS=Saccharomyces cerevisiae (strain ATCC 204508 / S288c) GN=IRC3 PE=1 SV=1 [Q06683] Score: 129.0	Saccharomyces cerevisiae S288c	K17677	3.6.4.-		0	0	0	0	0	0	0	0	0	0	0	0.0038276
Y8827_DICDI Uncharacterized helicase DDB_G0278827 OS=Dictyostelium discoideum GN=DDB_G0278827 PE=3 SV=1	Dictyostelium discoideum	-	3.6.4.-		0	0	0	0	0	0	0	0.00315507	0	0.0036735	0	0
RN213_HUMAN E3 ubiquitin-protein ligase RNF213 OS=Homo sapiens GN=RNF213 PE=1 SV=3	Homo sapiens	-	3.6.4.- 6.3.2.-		0	0	0	0	0	0	0	0.00631014	0.0043262	0	0.00365631	0
HELS_CALMQ ATP-dependent DNA helicase Hel308 OS=Caldivirga maquilingensis (strain ATCC 700844 / DSM 13496 / JCM 10307 / IC-167) GN=hel308 PE=3 SV=1	Caldivirga maquilingensis IC-167	K03726	3.6.4.12		0	0	0	0	0	0	0	0	0	0	0	0
HELS_PYRCJ ATP-dependent DNA helicase Hel308 OS=Pyrobaculum calidifontis (strain JCM 11548 / VA1) GN=hel308 PE=3 SV=1	Pyrobaculum calidifontis JCM 11548	K03726	3.6.4.12		0	0	0	0	0	0	0	0	0	0	0	0
RUVB_RHOOB Holliday junction ATP-dependent DNA helicase RuvB OS=Rhodococcus opacus (strain B4) GN=ruvB PE=3 SV=1	Rhodococcus opacus B4	K03551	3.6.4.12		0	0	0	0	0	0	0	0	0	0.0036735	0	0
RUVA_BACFR Holliday junction ATP-dependent DNA helicase RuvA OS=Bacteroides fragilis (strain YCH46) GN=ruvA PE=3 SV=1	Bacteroides fragilis	K03550	3.6.4.12		0	0	0	0	0	0	0	0	0	0	0	0
RUVB_PARL1 Holliday junction ATP-dependent DNA helicase RuvB OS=Parvibaculum lavamentivorans (strain DS-1 / DSM 13023 / NCIMB 13966) GN=ruvB PE=3 SV=1	Parvibaculum lavamentivorans DS-1	K03551	3.6.4.12		0	0	0	0	0	0	0	0	0	0	0	0
DNAB_MYCGE Replicative DNA helicase OS=Mycoplasma genitalium (strain ATCC 33530 / G-37 / NCTC 10195) GN=dnaB PE=3 SV=2	Mycoplasma genitalium G37	K02314	3.6.4.12		0	0	0	0	0	0	0	0	0	0	0	0
RUVB_UREP2 Holliday junction ATP-dependent DNA helicase RuvB OS=Ureaplasma parvum serovar 3 (strain ATCC 27815 / 27 / NCTC 11736) GN=ruvB PE=3 SV=1	Ureaplasma parvum serovar 3 str. ATCC 27815	K03551	3.6.4.12		0	0.00469197	0	0	0	0	0	0	0.0043262	0	0	0
RUVA_PETMO Holliday junction ATP-dependent DNA helicase RuvA OS=Petrotoga mobilis (strain DSM 10674 / SJ95) GN=ruvA PE=3 SV=1	Petrotoga mobilis SJ95	K03550	3.6.4.12		0	0	0	0	0	0	0	0	0	0	0	0
INO80_ASPOR Putative DNA helicase ino80 OS=Aspergillus oryzae (strain ATCC 42149 / RIB 40) GN=ino80 PE=3 SV=1	Aspergillus oryzae RIB40	-	3.6.4.12		0	0	0	0	0	0	0	0	0	0	0	0
SWR1_YARLI Helicase SWR1 OS=Yarrowia lipolytica (strain CLIB 122 / E 150) GN=SWR1 PE=3 SV=1	Yarrowia lipolytica CLIB122	K11681	3.6.4.12		0	0	0.00557877	0	0	0.00473393	0	0	0	0	0	0
RUVB1_YEAST RuvB-like protein 1 OS=Saccharomyces cerevisiae (strain ATCC 204508 / S288c) GN=RVB1 PE=1 SV=1	Saccharomyces cerevisiae S288c	K04499	3.6.4.12		0	0	0	0	0	0	0	0	0	0	0	0
ASCC3_MOUSE Activating signal cointegrator 1 complex subunit 3 OS=Mus musculus GN=Ascc3 PE=1 SV=1	Mammalia	-	3.6.4.12		0	0	0	0	0	0	0	0	0	0	0	0
DNAB_ODOSI Probable replicative DNA helicase OS=Odontella sinensis GN=dnaB PE=3 SV=1	Odontella sinensis	-	3.6.4.12		0	0	0	0	0	0	0	0	0	0	0	0
MCM3_ARATH DNA replication licensing factor MCM3 OS=Arabidopsis thaliana GN=MCM3 PE=1 SV=1	Arabidopsis thaliana	K02541	3.6.4.12		0	0	0	0	0	0	0	0	0	0	0	0
WRN_XENLA Werner syndrome ATP-dependent helicase homolog OS=Xenopus laevis GN=wrn PE=2 SV=1	Xenopus laevis	K10900	3.6.4.12 3.1.-.-		0	0	0	0	0	0.00473393	0	0.00946522	0.0173048	0.0036735	0.0109689	0.00765521
G3BP1_MOUSE Ras GTPase-activating protein-binding protein 1 OS=Mus musculus GN=G3bp1 PE=1 SV=1	Mus musculus	K17265	3.6.4.12 3.6.4.13		0	0	0	0	0	0	0	0	0	0	0	0
DED1_ASPFU ATP-dependent RNA helicase ded1 OS=Neosartorya fumigata (strain ATCC MYA-4609 / Af293 / CBS 101355 / FGSC A1100) GN=ded1 PE=3 SV=1	Aspergillus fumigatus Af293	K11594	3.6.4.13		0	0	0	0	0	0	0	0	0	0	0	0
DBP5_ASPFU ATP-dependent RNA helicase dbp5 OS=Neosartorya fumigata (strain ATCC MYA-4609 / Af293 / CBS 101355 / FGSC A1100) GN=dbp5 PE=3 SV=2	Aspergillus fumigatus Af293	K18655	3.6.4.13		0	0	0	0	0	0	0	0	0	0	0	0
DBP3_ASPNC ATP-dependent RNA helicase dbp3 OS=Aspergillus niger (strain CBS 513.88 / FGSC A1513) GN=dbp3 PE=3 SV=1	Aspergillus niger CBS 513.88	K14811	3.6.4.13		0	0	0	0	0	0	0	0	0.0043262	0	0	0
DED1_DEBHA ATP-dependent RNA helicase DED1 OS=Debaryomyces hansenii (strain ATCC 36239 / CBS 767 / JCM 1990 / NBRC 0083 / IGC 2968) GN=DED1 PE=3 SV=1	Debaryomyces hansenii CBS767	K11594	3.6.4.13		0	0	0	0	0	0	0	0	0	0	0	0
DBP10_PICGU ATP-dependent RNA helicase DBP10 OS=Meyerozyma guilliermondii (strain ATCC 6260 / CBS 566 / DSM 6381 / JCM 1539 / NBRC 10279 / NRRL Y-324) GN=DBP10 PE=3 SV=2	Meyerozyma guilliermondii ATCC 6260	K14808	3.6.4.13		0	0	0	0.00466242	0	0	0	0	0	0	0	0
MRH4_KLULA ATP-dependent RNA helicase MRH4, mitochondrial OS=Kluyveromyces lactis (strain ATCC 8585 / CBS 2359 / DSM 70799 / NBRC 1267 / NRRL Y-1140 / WM37) GN=MRH4 PE=3 SV=1	Kluyveromyces lactis NRRL Y-1140	K17678	3.6.4.13		0	0	0	0	0	0	0	0	0	0	0	0
PRP28_CANGA Pre-mRNA-splicing ATP-dependent RNA helicase PRP28 OS=Candida glabrata (strain ATCC 2001 / CBS 138 / JCM 3761 / NBRC 0622 / NRRL Y-65) GN=PRP28 PE=3 SV=1	Candida glabrata CBS 138	K12858	3.6.4.13		0	0	0	0	0	0	0	0	0	0	0	0
SLH1_YEAST Antiviral helicase SLH1 OS=Saccharomyces cerevisiae (strain ATCC 204508 / S288c) GN=SLH1 PE=1 SV=2	Saccharomyces cerevisiae S288c	K18664	3.6.4.13		0	0	0	0.00466242	0	0	0	0	0	0	0	0
IF4A_YEAS7 ATP-dependent RNA helicase eIF4A OS=Saccharomyces cerevisiae (strain YJM789) GN=TIF1 PE=3 SV=1	Saccharomyces cerevisiae YJM789	-	3.6.4.13		0.00541859	0	0	0	0	0	0	0	0	0	0	0
IFIH1_HUMAN Interferon-induced helicase C domain-containing protein 1 OS=Homo sapiens GN=IFIH1 PE=1 SV=3	Homo sapiens	K12647	3.6.4.13		0	0	0	0	0	0	0	0	0	0	0	0
DDX41_HUMAN Probable ATP-dependent RNA helicase DDX41 OS=Homo sapiens GN=DDX41 PE=1 SV=2	Homo sapiens	K13116	3.6.4.13		0	0	0	0	0	0	0	0.00631014	0	0	0	0
DHX33_MOUSE Putative ATP-dependent RNA helicase DHX33 OS=Mus musculus GN=Dhx33 PE=1 SV=1	Mus musculus	K17820	3.6.4.13		0	0	0	0	0	0	0	0	0	0	0	0
PRP16_BOVIN Pre-mRNA-splicing factor ATP-dependent RNA helicase PRP16 OS=Bos taurus GN=DHX38 PE=2 SV=1	Bos taurus	K12815	3.6.4.13		0	0	0	0	0	0	0	0	0	0.0036735	0	0
IF413_TOBAC Eukaryotic initiation factor 4A-13 (Fragment) OS=Nicotiana tabacum PE=2 SV=1	Eukaryota	-	3.6.4.13		0	0	0	0	0	0	0	0	0	0	0	0
IF4A_CRYNB ATP-dependent RNA helicase eIF4A OS=Cryptococcus neoformans var. neoformans serotype D (strain B-3501A) GN=TIF1 PE=3 SV=1	Eukaryota	K03257	3.6.4.13		0	0	0	0	0	0	0	0	0	0	0	0
G1MEC4_AILME Uncharacterized protein OS=Ailuropoda melanoleuca GN=EIF4A1 PE=3 SV=1	Eukaryota	K03257	3.6.4.13		0	0	0	0	0	0	0	0	0	0	0	0
IF4A_DICDI Eukaryotic initiation factor 4A OS=Dictyostelium discoideum GN=tifA PE=3 SV=1	Eukaryota	K03257	3.6.4.13		0	0	0	0	0	0	0	0	0	0	0	0
IF4A9_TOBAC Eukaryotic initiation factor 4A-9 OS=Nicotiana tabacum PE=2 SV=1	Eukaryota	-	3.6.4.13		0	0	0	0	0	0	0	0	0	0	0	0
IF4A1_ORYSJ Eukaryotic initiation factor 4A-1 OS=Oryza sativa subsp. japonica GN=Os06g0701100 PE=2 SV=2	Eukaryota	K03257	3.6.4.13		0	0	0	0	0	0	0	0	0	0	0	0
G1L2C1_AILME Uncharacterized protein OS=Ailuropoda melanoleuca GN=EIF4A2 PE=3 SV=1	Eukaryota	K03257	3.6.4.13		0	0	0	0	0	0	0	0	0	0	0	0
RH58_ORYSJ DEAD-box ATP-dependent RNA helicase 58, chloroplastic OS=Oryza sativa subsp. japonica GN=Os01g0970600 PE=2 SV=2	Oryza sativa Japonica Group	-	3.6.4.13		0.00541859	0.00469197	0	0.00466242	0	0	0	0	0	0	0	0
DEXHC_ARATH DExH-box ATP-dependent RNA helicase DExH12 OS=Arabidopsis thaliana GN=EMB1507 PE=2 SV=1	Arabidopsis thaliana	K12854	3.6.4.13		0	0	0	0	0	0	0.00497934	0.00315507	0.0129786	0.022041	0.0146252	0.0114828
RH29_ARATH Putative DEAD-box ATP-dependent RNA helicase 29 OS=Arabidopsis thaliana GN=RH29 PE=3 SV=1	Arabidopsis thaliana	K14808	3.6.4.13		0	0	0	0	0	0	0	0	0	0	0	0
D2HZ26_AILME Putative uncharacterized protein (Fragment) OS=Ailuropoda melanoleuca GN=PANDA_018037 PE=3 SV=1	root	K13982	3.6.4.13		0	0	0	0	0	0	0	0	0	0.0036735	0.00365631	0
SPAST_HUMAN Spastin OS=Homo sapiens GN=SPAST PE=1 SV=1	Homo sapiens	K13254	3.6.4.3		0	0	0	0	0	0	0	0	0	0	0	0
OBG_CLAM3 GTPase Obg OS=Clavibacter michiganensis subsp. michiganensis (strain NCPPB 382) GN=obg PE=3 SV=1	Clavibacter michiganensis subsp. michiganensis NCPPB 382	K03979	3.6.5.-		0	0	0.00557877	0	0	0	0	0	0	0	0.00365631	0
OBG_AGRFC GTPase Obg OS=Agrobacterium fabrum (strain C58 / ATCC 33970) GN=obg PE=3 SV=2	Agrobacterium fabrum str. C58	K03979	3.6.5.-		0	0	0	0	0	0	0	0	0	0	0	0
OBG_RALPJ GTPase Obg OS=Ralstonia pickettii (strain 12J) GN=obg PE=3 SV=1	Ralstonia pickettii 12J	K03979	3.6.5.-		0	0	0	0	0	0	0	0	0	0	0	0
OBG_SYNFM GTPase Obg OS=Syntrophobacter fumaroxidans (strain DSM 10017 / MPOB) GN=obg PE=3 SV=1	Syntrophobacter fumaroxidans MPOB	K03979	3.6.5.-		0	0	0	0	0	0	0	0	0	0	0	0
OBG_MARMS GTPase Obg OS=Marinomonas sp. (strain MWYL1) GN=obg PE=3 SV=1	Marinomonas sp. MWYL1	K03979	3.6.5.-		0	0	0	0	0	0	0	0	0	0	0	0
SEY1_SCLS1 Protein sey1 OS=Sclerotinia sclerotiorum (strain ATCC 18683 / 1980 / Ss-1) GN=sey1 PE=3 SV=1	Sclerotinia sclerotiorum 1980 UF-70	-	3.6.5.-		0	0	0	0	0	0	0	0	0	0	0	0
GUF1_NECH7 Translation factor GUF1, mitochondrial OS=Nectria haematococca (strain 77-13-4 / ATCC MYA-4622 / FGSC 9596 / MPVI) GN=GUF1 PE=3 SV=1	Nectria haematococca mpVI 77-13-4	-	3.6.5.-		0	0	0	0	0	0	0	0	0	0.0036735	0	0
GUF1_SORBI Translation factor GUF1 homolog, mitochondrial OS=Sorghum bicolor GN=Sb10g003070 PE=3 SV=1	Sorghum bicolor	-	3.6.5.-		0	0	0	0	0	0	0	0	0.0043262	0	0	0
LEPA_LACRJ Elongation factor 4 OS=Lactobacillus reuteri (strain JCM 1112) GN=lepA PE=3 SV=1	Lactobacillus reuteri	K03596	3.6.5.n1		0	0	0	0	0.00466331	0	0	0.00315507	0	0	0	0
LEPA_PARP8 Elongation factor 4 OS=Paraburkholderia phymatum (strain DSM 17167 / CIP 108236 / LMG 21445 / STM815) GN=lepA PE=3 SV=1	Burkholderia phymatum STM815	K03596	3.6.5.n1		0	0	0	0.00466242	0	0	0	0	0.0043262	0	0.00365631	0
LEPA_RHOFT Elongation factor 4 OS=Rhodoferax ferrireducens (strain ATCC BAA-621 / DSM 15236 / T118) GN=lepA PE=3 SV=1	Burkholderiales	K03596	3.6.5.n1		0	0	0	0.00466242	0	0	0	0	0	0	0	0
LEPA_DESAD Elongation factor 4 OS=Desulfovibrio salexigens (strain ATCC 14822 / DSM 2638 / NCIB 8403 / VKM B-1763) GN=lepA PE=3 SV=1	Desulfovibrio salexigens DSM 2638	K03596	3.6.5.n1		0	0	0	0	0	0	0	0	0.0043262	0	0	0
MHPC_KLEP7 2-hydroxy-6-oxononadienedioate/2-hydroxy-6-oxononatrienedioate hydrolase OS=Klebsiella pneumoniae subsp. pneumoniae (strain ATCC 700721 / MGH 78578) GN=mhpC PE=3 SV=1	Klebsiella pneumoniae subsp. pneumoniae MGH 78578	K05714	3.7.1.14		0	0	0	0	0	0	0.00497934	0	0	0	0	0
KYNU_BACAN Kynureninase OS=Bacillus anthracis GN=kynU PE=3 SV=1	Bacillus	K01556	3.7.1.3		0	0	0	0	0	0	0	0.00315507	0	0	0	0
KYNU_XANOM Kynureninase OS=Xanthomonas oryzae pv. oryzae (strain MAFF 311018) GN=kynU PE=3 SV=1	Xanthomonas oryzae pv. oryzae MAFF 311018	-	3.7.1.3		0	0	0	0	0	0	0	0	0	0	0	0
DAPAL_PYRIL Uncharacterized DapA-like lyase Pisl_0309 OS=Pyrobaculum islandicum (strain DSM 4184 / JCM 9189 / GEO3) GN=dapAL PE=3 SV=2	Pyrobaculum islandicum DSM 4184	K01714	4.-.-.-		0	0	0	0	0	0	0.00995867	0	0	0.0036735	0	0
CPXT_SYNPY Chromophore lyase CpcT/CpeT OS=Synechococcus sp. (strain WH8020) GN=cpcT PE=3 SV=1	Synechococcus sp. WH 8020	-	4.-.-.-		0	0	0	0	0	0	0	0	0	0	0	0
PDC1_ORYSJ Pyruvate decarboxylase 1 OS=Oryza sativa subsp. japonica GN=PDC1 PE=2 SV=1	Oryza sativa Japonica Group	K01568	4.1.1.1		0	0	0	0	0	0	0	0.00315507	0	0	0	0
DCEB_ECOL6 Glutamate decarboxylase beta OS=Escherichia coli O6:H1 (strain CFT073 / ATCC 700928 / UPEC) GN=gadB PE=3 SV=2	Enterobacteriaceae	K01580	4.1.1.15		0	0.00938394	0.0390514	0.055949	0.0419698	0.0568072	0.219091	0.151443	0.233615	0.0624495	0.0877514	0.0421037
ADIA_ECOLI Biodegradative arginine decarboxylase OS=Escherichia coli (strain K12) GN=adiA PE=1 SV=1	Escherichia coli K-12	K01584	4.1.1.19		0	0	0	0	0	0	0	0	0	0	0	0
DCDA_ZYMMO Diaminopimelate decarboxylase OS=Zymomonas mobilis subsp. mobilis (strain ATCC 31821 / ZM4 / CP4) GN=lysA PE=3 SV=1	Zymomonas mobilis subsp. mobilis ZM4 = ATCC 31821	K01586	4.1.1.20		0	0	0	0	0.00466331	0	0	0	0	0	0	0
DDC_CAEEL Probable aromatic-L-amino-acid decarboxylase OS=Caenorhabditis elegans GN=hdl-1 PE=2 SV=3	Caenorhabditis elegans	K01593	4.1.1.28		0.0108372	0.00469197	0.00557877	0.00932484	0.00466331	0	0	0	0	0	0.00365631	0
CAPP_VEREI Phosphoenolpyruvate carboxylase OS=Verminephrobacter eiseniae (strain EF01-2) GN=ppc PE=3 SV=1	Verminephrobacter eiseniae EF01-2	K01595	4.1.1.31		0	0	0	0	0	0	0	0	0	0.0036735	0	0
CAPP_CHRVO Phosphoenolpyruvate carboxylase OS=Chromobacterium violaceum (strain ATCC 12472 / DSM 30191 / JCM 1249 / NBRC 12614 / NCIMB 9131 / NCTC 9757) GN=ppc PE=3 SV=1	Bacteria	K01595	4.1.1.31		0	0	0	0	0	0	0	0	0	0	0	0
CAPP_LACAC Phosphoenolpyruvate carboxylase OS=Lactobacillus acidophilus (strain ATCC 700396 / NCK56 / N2 / NCFM) GN=ppc PE=3 SV=1	Bacteria	K01595	4.1.1.31		0	0	0	0	0	0	0	0	0	0	0	0
CAPP_STRR6 Phosphoenolpyruvate carboxylase OS=Streptococcus pneumoniae (strain ATCC BAA-255 / R6) GN=ppc PE=3 SV=1	Bacteria	K01595	4.1.1.31		0	0	0	0	0	0	0	0	0	0	0	0
CAPP2_CHLRE Phosphoenolpyruvate carboxylase 2 OS=Chlamydomonas reinhardtii GN=Ppc2 PE=2 SV=1	Chlamydomonas reinhardtii	-	4.1.1.31		0.0108372	0	0	0.00466242	0	0	0	0	0	0	0	0
CAPPC_FLATR Phosphoenolpyruvate carboxylase 2 OS=Flaveria trinervia GN=PPCC PE=1 SV=1	Streptophyta	-	4.1.1.31		0	0	0	0	0	0	0	0	0	0	0	0
PCKG_THEAC Phosphoenolpyruvate carboxykinase [GTP] OS=Thermoplasma acidophilum (strain ATCC 25905 / DSM 1728 / JCM 9062 / NBRC 15155 / AMRC-C165) GN=pckG PE=3 SV=2	Thermoplasma acidophilum DSM 1728	K01596	4.1.1.32		0	0	0	0	0	0	0	0	0.0043262	0	0	0
PCKG_BURMA Phosphoenolpyruvate carboxykinase [GTP] OS=Burkholderia mallei (strain ATCC 23344) GN=pckG PE=3 SV=1	Burkholderia mallei ATCC 23344	K01596	4.1.1.32		0	0.00469197	0	0.00466242	0	0	0	0	0	0	0	0
DCUP_HAHCH Uroporphyrinogen decarboxylase OS=Hahella chejuensis (strain KCTC 2396) GN=hemE PE=3 SV=1	Hahella chejuensis KCTC 2396	K01599	4.1.1.37		0.0325115	0.0422277	0.0223151	0.0372993	0.0233165	0.0378714	0.00497934	0.0157754	0.0346096	0.014694	0.0402194	0
RBS_CAPAN Ribulose bisphosphate carboxylase small chain, chloroplastic OS=Capsicum annuum GN=RBCS PE=2 SV=1	Streptophyta	-	4.1.1.39		0.00541859	0.00938394	0.0167363	0	0	0	0.00995867	0	0	0	0	0
RBS8_NICPL Ribulose bisphosphate carboxylase small chain 8B, chloroplastic OS=Nicotiana plumbaginifolia GN=RBCS-8B PE=3 SV=1	Streptophyta	-	4.1.1.39		0.00541859	0.00938394	0.0167363	0	0	0	0	0	0	0	0.00365631	0
RBL_VITSX Ribulose bisphosphate carboxylase large chain (Fragments) OS=Vitis sp. GN=rbcL PE=1 SV=1	Streptophyta	-	4.1.1.39		0	0	0	0	0	0	0	0	0	0	0	0
RBL_MAGLI Ribulose bisphosphate carboxylase large chain (Fragment) OS=Magnolia liliiflora GN=rbcL PE=3 SV=1	Streptophyta	-	4.1.1.39		0	0	0	0	0	0	0	0	0	0	0	0
RBS5_FRIAG Ribulose bisphosphate carboxylase small chain 5, chloroplastic OS=Fritillaria agrestis GN=RBCS5 PE=2 SV=1	Streptophyta	-	4.1.1.39		0	0	0	0	0	0	0	0	0	0	0	0
RBS1_SPIOL Ribulose bisphosphate carboxylase small chain OS=Spinacia oleracea GN=RBCS PE=1 SV=1	Streptophyta	-	4.1.1.39		0	0	0	0	0	0	0	0	0	0	0	0
RBL_PINPS Ribulose bisphosphate carboxylase large chain (Fragments) OS=Pinus pinaster GN=rbcL PE=1 SV=1	Streptophyta	-	4.1.1.39		0	0	0	0	0	0	0	0	0	0	0	0
RBL_MAGLA Ribulose bisphosphate carboxylase large chain (Fragment) OS=Magnolia latahensis GN=rbcL PE=3 SV=1	root	-	4.1.1.39		0	0	0	0	0	0	0	0	0	0	0	0
RBL_VILCA Ribulose bisphosphate carboxylase large chain (Fragment) OS=Villarsia calthifolia GN=rbcL PE=3 SV=1	root	-	4.1.1.39		0	0	0	0	0	0	0	0	0	0	0.00365631	0
GCL_ECOLI Glyoxylate carboligase OS=Escherichia coli (strain K12) GN=gcl PE=1 SV=2	Escherichia coli K-12	K01608	4.1.1.47		0	0	0	0	0	0	0	0	0	0.0036735	0	0
TRPC_PARPJ Indole-3-glycerol phosphate synthase OS=Paraburkholderia phytofirmans (strain DSM 17436 / LMG 22146 / PsJN) GN=trpC PE=3 SV=1	Burkholderia phytofirmans PsJN	K01609	4.1.1.48		0	0	0	0	0	0	0	0	0	0.0036735	0	0
TRPC_PSESM Indole-3-glycerol phosphate synthase OS=Pseudomonas syringae pv. tomato (strain DC3000) GN=trpC PE=3 SV=1	Pseudomonas syringae pv. tomato str. DC3000	K01609	4.1.1.48		0	0	0	0	0	0	0	0	0	0.0036735	0	0
PCKA_STAA2 Phosphoenolpyruvate carboxykinase [ATP] OS=Staphylococcus aureus (strain JH1) GN=pckA PE=3 SV=1	Staphylococcus aureus subsp. aureus	K01610	4.1.1.49		0	0	0	0	0	0	0	0.00315507	0	0	0	0
PCKA_PSEPG Phosphoenolpyruvate carboxykinase [ATP] OS=Pseudomonas putida (strain GB-1) GN=pckA PE=3 SV=1	Pseudomonas putida GB-1	K01610	4.1.1.49		0	0	0	0	0	0	0.00497934	0.00315507	0	0	0	0
PCKA_BACFN Phosphoenolpyruvate carboxykinase [ATP] OS=Bacteroides fragilis (strain ATCC 25285 / DSM 2151 / JCM 11019 / NCTC 9343) GN=pckA PE=3 SV=1	Bacteria	K01610	4.1.1.49		0	0	0	0.055949	0.060623	0.0473393	0.0497934	0.0504811	0.0562405	0.0330615	0.0548446	0.0267932
PCKA_SALNS Phosphoenolpyruvate carboxykinase [ATP] OS=Salmonella newport (strain SL254) GN=pckA PE=3 SV=1	Bacteria	K01610	4.1.1.49		0	0	0	0.0372993	0.0419698	0.0378714	0.0697107	0.0567913	0.112481	0.0110205	0.0219378	0.00765521
PSD_PARPJ Phosphatidylserine decarboxylase proenzyme OS=Paraburkholderia phytofirmans (strain DSM 17436 / LMG 22146 / PsJN) GN=psd PE=3 SV=1	Burkholderia phytofirmans PsJN	K01613	4.1.1.65		0	0	0	0	0	0	0	0	0	0	0	0
HPDL_PEPDC 4-hydroxyphenylacetate decarboxylase large subunit OS=Peptoclostridium difficile (strain CD196) GN=hpdB PE=3 SV=1	[Clostridium] difficile	K18427	4.1.1.83		0	0	0	0	0	0	0	0	0	0	0	0
ULAD_SHISS 3-keto-L-gulonate-6-phosphate decarboxylase UlaD OS=Shigella sonnei (strain Ss046) GN=ulaD PE=3 SV=1	Enterobacteriaceae	K03078	4.1.1.85		0	0	0	0	0	0	0.00497934	0.00315507	0.0043262	0	0	0.0114828
PHK_LACLA Probable phosphoketolase OS=Lactococcus lactis subsp. lactis (strain IL1403) GN=LL1502 PE=3 SV=1	Lactobacillales	K01621	4.1.2.-		0	0.00938394	0.00557877	0	0	0	0	0	0	0	0	0
PHK_CLOAB Probable phosphoketolase OS=Clostridium acetobutylicum (strain ATCC 824 / DSM 792 / JCM 1419 / LMG 5710 / VKM B-1787) GN=CA_C1343 PE=3 SV=1	Firmicutes	K01621	4.1.2.-		0	0.00938394	0.00557877	0	0	0	0	0	0	0	0	0
XPKA_LACPE Xylulose-5-phosphate phosphoketolase OS=Lactobacillus pentosus GN=xpkA PE=1 SV=3	Firmicutes	K01621	4.1.2.-		0	0.00938394	0.00557877	0	0	0	0	0	0	0	0	0
FSAB_ECO57 Fructose-6-phosphate aldolase 2 OS=Escherichia coli O157:H7 GN=fsaB PE=3 SV=1	Escherichia coli	K08314	4.1.2.-		0	0	0	0	0	0	0	0.00315507	0	0.007347	0	0
MG: Probable phosphoketolase OS=Mycobacterium paratuberculosis (strain ATCC BAA-968 / K-10) GN=MAP_1573c PE=3 SV=1 [Q73ZM8] Score: 693.0	Bacteria	K01621	4.1.2.-		0	0.00469197	0.00557877	0.00466242	0.00466331	0.00473393	0	0	0	0	0	0
ALF1_ECOL6 Fructose-bisphosphate aldolase class 1 OS=Escherichia coli O6:H1 (strain CFT073 / ATCC 700928 / UPEC) GN=fbaB PE=3 SV=2	Escherichia coli	K11645	4.1.2.13		0	0	0	0	0	0	0.00497934	0.00946522	0.0173048	0	0	0
ALF_ECOLI Fructose-bisphosphate aldolase class 2 OS=Escherichia coli (strain K12) GN=fbaA PE=1 SV=2	Enterobacteriaceae	K01624	4.1.2.13		0.0433487	0.0516117	0.0446302	0.0466242	0.0373065	0.0284036	0.07469	0.0662565	0.0605667	0.0330615	0.0329068	0.0650693
ALF_CAMJE Fructose-bisphosphate aldolase OS=Campylobacter jejuni subsp. jejuni serotype O:2 (strain ATCC 700819 / NCTC 11168) GN=fba PE=1 SV=1	Proteobacteria	K01624	4.1.2.13		0	0	0	0	0	0	0	0	0	0	0	0.0038276
MG: Fructose-bisphosphate aldolase OS=Geobacillus stearothermophilus GN=fba PE=3 SV=3 [P94453] Score: 112.0	Bacteria	-	4.1.2.13		0.0487673	0.0422277	0.0334726	0.0419618	0.0326432	0.0236696	0.0796694	0.0914971	0.0692191	0.0551025	0.0877514	0.0918625
ALF_MAIZE Fructose-bisphosphate aldolase, cytoplasmic isozyme OS=Zea mays PE=2 SV=1	Zea mays	K01623	4.1.2.13		0	0	0	0	0	0	0	0	0	0	0	0
ALFC_PINST Putative fructose-bisphosphate aldolase, chloroplastic (Fragments) OS=Pinus strobus PE=1 SV=1	Streptophyta	-	4.1.2.13		0	0	0	0	0	0	0	0	0	0	0	0
ALFC2_PEA Fructose-bisphosphate aldolase 2, chloroplastic OS=Pisum sativum PE=1 SV=2	Streptophyta	-	4.1.2.13		0	0	0	0	0	0	0	0	0	0	0	0
ALFC2_ARATH Probable fructose-bisphosphate aldolase 2, chloroplastic OS=Arabidopsis thaliana GN=FBA2 PE=1 SV=2	Streptophyta	K01623	4.1.2.13		0	0	0	0	0	0	0	0	0	0	0	0
FUCA_SHIFL L-fuculose phosphate aldolase OS=Shigella flexneri GN=fucA PE=3 SV=1	Gammaproteobacteria	K01628	4.1.2.17		0	0	0	0	0	0	0	0.00315507	0	0.0036735	0.00365631	0
RHAD_SHIBS Rhamnulose-1-phosphate aldolase OS=Shigella boydii serotype 4 (strain Sb227) GN=rhaD PE=3 SV=1	Enterobacteriaceae	K01629	4.1.2.19		0	0.00469197	0	0	0.00466331	0.00946786	0.00497934	0	0.0043262	0	0.00731261	0.0114828
GARL_ESCF3 5-keto-4-deoxy-D-glucarate aldolase OS=Escherichia fergusonii (strain ATCC 35469 / DSM 13698 / CDC 0568-73) GN=garL PE=3 SV=1	Enterobacteriaceae	K01630	4.1.2.20		0	0.00938394	0	0.0233121	0.0186532	0.00946786	0.014938	0.00315507	0.00865239	0.007347	0	0
GARL_ECO8A 5-keto-4-deoxy-D-glucarate aldolase OS=Escherichia coli O8 (strain IAI1) GN=garL PE=3 SV=1	Enterobacteriaceae	K01630	4.1.2.20		0.00541859	0.0140759	0	0.0233121	0.0186532	0.0189357	0.014938	0.00631014	0.0129786	0.0110205	0.00365631	0.0038276
DEOC_SERP5 Deoxyribose-phosphate aldolase OS=Serratia proteamaculans (strain 568) GN=deoC PE=3 SV=1	Enterobacteriaceae	K01619	4.1.2.4		0	0.00469197	0	0	0	0	0.0199173	0.00946522	0.00865239	0	0.00731261	0.0038276
DEOC_SHIFL Deoxyribose-phosphate aldolase OS=Shigella flexneri GN=deoC PE=3 SV=2	Gammaproteobacteria	K01619	4.1.2.4		0.0270929	0.0375358	0.0111575	0.0233121	0.0139899	0.0142018	0.089628	0.088342	0.0519143	0.0330615	0.0365631	0.0459313
DEOC_VIBVU Deoxyribose-phosphate aldolase OS=Vibrio vulnificus (strain CMCP6) GN=deoC PE=3 SV=1	Gammaproteobacteria	K01619	4.1.2.4		0	0.00938394	0	0	0	0	0.044814	0.0347058	0.0173048	0.0110205	0.0146252	0.0267932
DEOC_ERWT9 Deoxyribose-phosphate aldolase OS=Erwinia tasmaniensis (strain DSM 17950 / CIP 109463 / Et1/99) GN=deoC PE=3 SV=1	Proteobacteria	K01619	4.1.2.4		0	0.00469197	0	0	0	0	0.0199173	0.00946522	0.0043262	0	0	0.0038276
HIS6_METAR Imidazole glycerol phosphate synthase subunit HisF OS=Methanocella arvoryzae (strain DSM 22066 / NBRC 105507 / MRE50) GN=hisF PE=3 SV=1	Methanocella arvoryzae MRE50	K02500	4.1.3.-		0	0	0	0	0	0	0	0	0	0	0	0.0038276
HIS6_MYCBP Imidazole glycerol phosphate synthase subunit HisF OS=Mycobacterium bovis (strain BCG / Pasteur 1173P2) GN=hisF PE=3 SV=1	Mycobacterium	K02500	4.1.3.-		0	0	0	0	0	0	0	0	0	0	0	0
HIS61_SYNPX Imidazole glycerol phosphate synthase subunit hisF1 OS=Synechococcus sp. (strain WH8102) GN=hisF1 PE=3 SV=1	Synechococcus sp. WH 8102	K02500	4.1.3.-		0	0.00469197	0	0	0	0	0	0	0	0	0	0
HIS6_LACLA Imidazole glycerol phosphate synthase subunit HisF OS=Lactococcus lactis subsp. lactis (strain IL1403) GN=hisF PE=3 SV=3	Lactococcus lactis subsp. lactis Il1403	K02500	4.1.3.-		0	0	0	0	0.00466331	0	0	0	0	0	0	0
HIS6_BRADU Imidazole glycerol phosphate synthase subunit HisF OS=Bradyrhizobium diazoefficiens (strain JCM 10833 / IAM 13628 / NBRC 14792 / USDA 110) GN=hisF PE=3 SV=1	Bradyrhizobium japonicum USDA 110	K02500	4.1.3.-		0	0	0	0	0	0	0	0	0	0	0	0.0038276
ACEA_SALTY Isocitrate lyase OS=Salmonella typhimurium (strain LT2 / SGSC1412 / ATCC 700720) GN=aceA PE=3 SV=2	Enterobacteriaceae	K01637	4.1.3.1		0	0	0	0	0	0	0.0199173	0.0157754	0.0129786	0	0	0
ACEA_RICCO Isocitrate lyase OS=Ricinus communis PE=2 SV=1	Ricinus communis	-	4.1.3.1		0	0	0	0	0	0	0	0	0	0	0	0
ALKH_ECOL6 KHG/KDPG aldolase OS=Escherichia coli O6:H1 (strain CFT073 / ATCC 700928 / UPEC) GN=eda PE=3 SV=1	Enterobacteriaceae	K01625	4.1.3.16 4.1.2.14		0	0	0	0	0	0	0.00995867	0.00631014	0.00865239	0	0.00365631	0.0038276
RRAAH_SACEN Putative 4-hydroxy-4-methyl-2-oxoglutarate aldolase OS=Saccharopolyspora erythraea (strain ATCC 11635 / DSM 40517 / JCM 4748 / NBRC 13426 / NCIMB 8594 / NRRL 2338) GN=SACE_2149 PE=3 SV=1	Saccharopolyspora erythraea NRRL 2338	K02553	4.1.3.17 4.1.1.3		0	0	0	0	0	0	0.00497934	0	0	0	0	0
TRPE_AERPE Anthranilate synthase component 1 OS=Aeropyrum pernix (strain ATCC 700893 / DSM 11879 / JCM 9820 / NBRC 100138 / K1) GN=trpE PE=3 SV=2	Aeropyrum pernix K1	K01657	4.1.3.27		0.00541859	0.00938394	0	0	0	0.00946786	0.00995867	0.00631014	0.0173048	0.0110205	0.00731261	0
NANA_CLOPS N-acetylneuraminate lyase OS=Clostridium perfringens (strain SM101 / Type A) GN=nanA PE=3 SV=1	Clostridium perfringens	K01639	4.1.3.3		0	0	0	0	0	0	0	0	0.0043262	0.0110205	0.00731261	0.0038276
NANA_SHISS N-acetylneuraminate lyase OS=Shigella sonnei (strain Ss046) GN=nanA PE=3 SV=1	Enterobacteriaceae	K01639	4.1.3.3		0	0	0	0	0	0	0.0348554	0.0347058	0.0346096	0.0257145	0.0292505	0
NPL_RAT N-acetylneuraminate lyase OS=Rattus norvegicus GN=Npl PE=2 SV=1	Rattus norvegicus	K01639	4.1.3.3		0	0	0	0	0	0	0	0	0	0	0	0
MENB_PASMU 1,4-dihydroxy-2-naphthoyl-CoA synthase OS=Pasteurella multocida (strain Pm70) GN=menB PE=3 SV=1	Gammaproteobacteria	K01661	4.1.3.36		0	0	0	0	0	0	0.00497934	0	0	0	0	0
HOA1_AZOSB 4-hydroxy-2-oxovalerate aldolase 1 OS=Azoarcus sp. (strain BH72) GN=lapG PE=3 SV=1	Azoarcus sp. BH72	K18365	4.1.3.39		0.0108372	0	0	0.00466242	0.0139899	0.00946786	0	0.00946522	0	0.0036735	0	0
CILA_ECOLI Citrate lyase alpha chain OS=Escherichia coli (strain K12) GN=citF PE=2 SV=1	Escherichia coli K-12	K01643	4.1.3.6 2.8.3.10		0	0	0.00557877	0	0	0	0	0	0	0	0	0
CITE_ECOL6 Citrate lyase subunit beta OS=Escherichia coli O6:H1 (strain CFT073 / ATCC 700928 / UPEC) GN=citE PE=3 SV=1	Gammaproteobacteria	K01644	4.1.3.6 4.1.3.34		0.0108372	0.0140759	0	0.00466242	0.00466331	0.00473393	0.00497934	0.00946522	0.0129786	0	0.00731261	0
TNAA_SHIFL Tryptophanase OS=Shigella flexneri GN=tnaA PE=3 SV=1	Gammaproteobacteria	K01667	4.1.99.1		0	0	0	0.00932484	0	0.00946786	0.00497934	0.0126203	0.0173048	0.007347	0.00365631	0.0038276
THIC_STRGG Phosphomethylpyrimidine synthase OS=Streptomyces griseus subsp. griseus (strain JCM 4626 / NBRC 13350) GN=thiC PE=3 SV=1	Streptomyces griseus subsp. griseus NBRC 13350	K03147	4.1.99.17		0.00541859	0	0	0	0	0	0	0	0	0	0	0
MOAA_CLOPS Cyclic pyranopterin monophosphate synthase OS=Clostridium perfringens (strain SM101 / Type A) GN=moaA PE=3 SV=1	Clostridium perfringens SM101	K03639	4.1.99.18		0	0	0	0	0	0	0	0	0	0	0	0
HGDB_ACIFV (R)-2-hydroxyglutaryl-CoA dehydratase subunit beta OS=Acidaminococcus fermentans (strain ATCC 25085 / DSM 20731 / VR4) GN=hgdB PE=1 SV=3	Acidaminococcus fermentans DSM 20731	-	4.2.1.-		0	0	0	0	0	0	0	0	0	0.014694	0.00731261	0
MG: Carbonic anhydrase OS=Mycobacterium smegmatis (strain ATCC 700084 / mc(2)155) GN=cynT PE=1 SV=1 [A0R566] Score: 138.0	Mycobacterium smegmatis str. MC2 155	K01673	4.2.1.1		0	0	0	0	0	0	0.00497934	0.00315507	0.0043262	0	0.00365631	0
AROQ_BACCN 3-dehydroquinate dehydratase OS=Bacillus cytotoxicus (strain DSM 22905 / CIP 110041 / 391-98 / NVH 391-98) GN=aroQ PE=3 SV=1	Bacillus cytotoxicus NVH 391-98	K03786	4.2.1.10		0	0	0	0	0	0	0	0	0	0	0.00365631	0
MG: 3-dehydroquinate dehydratase OS=Clostridium beijerinckii (strain ATCC 51743 / NCIMB 8052) GN=aroQ PE=3 SV=1 [A6M249] Score: 201.0	Clostridium beijerinckii NCIMB 8052	K03786	4.2.1.10		0	0	0	0.00466242	0	0	0	0	0	0	0	0
CYNS_TALMQ Cyanate hydratase OS=Talaromyces marneffei (strain ATCC 18224 / CBS 334.59 / QM 7333) GN=cyn1 PE=3 SV=1	Talaromyces marneffei ATCC 18224	-	4.2.1.104		0	0	0	0	0	0	0	0	0	0	0	0
CYNS_SORBI Cyanate hydratase OS=Sorghum bicolor GN=CYN PE=3 SV=1	Sorghum bicolor	K01725	4.2.1.104		0	0	0	0	0	0	0	0	0	0	0.00365631	0
ECTC_BORBR L-ectoine synthase OS=Bordetella bronchiseptica (strain ATCC BAA-588 / NCTC 13252 / RB50) GN=ectC PE=3 SV=1	Bordetella	K06720	4.2.1.108		0	0.00469197	0	0	0	0	0	0	0	0	0	0
ENO_LACDB Enolase OS=Lactobacillus delbrueckii subsp. bulgaricus (strain ATCC BAA-365) GN=eno PE=3 SV=1	Lactobacillus	K01689	4.2.1.11		0	0	0	0	0	0	0	0	0	0	0	0
MG: Enolase OS=Cupriavidus pinatubonensis (strain JMP 134 / LMG 1197) GN=eno PE=3 SV=1 [Q473G4] Score: 527.0	Bacteria	K01689	4.2.1.11		0	0	0.00557877	0	0.00466331	0.00473393	0.00497934	0.00946522	0.00865239	0.0036735	0.00365631	0
ENO_PEPDI Enolase (Fragments) OS=Peptoclostridium difficile PE=1 SV=1	Bacteria	-	4.2.1.11		0	0	0.00557877	0.00466242	0	0	0.014938	0.0220855	0.0302834	0.0110205	0.0146252	0
ENO_GLOVI Enolase OS=Gloeobacter violaceus (strain PCC 7421) GN=eno PE=3 SV=1	Bacteria	K01689	4.2.1.11		0	0	0	0	0	0	0.014938	0.0220855	0.0129786	0.0110205	0.0109689	0
ENO_MACCJ Enolase OS=Macrococcus caseolyticus (strain JCSC5402) GN=eno PE=3 SV=1	Bacteria	K01689	4.2.1.11		0.292604	0.192371	0.278938	0.237783	0.195859	0.208293	0.482996	0.514277	0.445598	0.246124	0.288848	0.264105
ENO_BLOPB Enolase OS=Blochmannia pennsylvanicus (strain BPEN) GN=eno PE=3 SV=1	Bacteria	K01689	4.2.1.11		0.0162558	0.0140759	0.0111575	0.0186497	0.0139899	0.0236696	0.00497934	0.00631014	0.0129786	0.007347	0.00731261	0
ENO_BORBU Enolase OS=Borrelia burgdorferi (strain ATCC 35210 / B31 / CIP 102532 / DSM 4680) GN=eno PE=3 SV=1	Bacteria	K01689	4.2.1.11		0	0	0	0	0	0	0	0.00946522	0.00865239	0	0	0
ENO4_XENLA Enolase 4 OS=Xenopus laevis GN=eno4 PE=2 SV=2	Xenopus laevis	-	4.2.1.11		0	0	0	0	0	0	0	0	0.0043262	0	0	0
ENO_COCLU Enolase OS=Cochliobolus lunatus PE=2 SV=1	Eukaryota	-	4.2.1.11		0	0	0	0	0	0	0.00995867	0.00946522	0.00865239	0.0036735	0.00365631	0
ENO_DORPE Enolase OS=Doryteuthis pealeii PE=2 SV=1	Eukaryota	-	4.2.1.11		0	0	0	0	0	0	0.00995867	0.00946522	0.00865239	0.0036735	0.00365631	0
ENOA_HUMAN Alpha-enolase OS=Homo sapiens GN=ENO1 PE=1 SV=2	root	K01689	4.2.1.11		0	0	0	0	0	0	0.00995867	0.00946522	0.00865239	0.0036735	0.00365631	0
ENO_DROME Enolase OS=Drosophila melanogaster GN=Eno PE=1 SV=2	root	-	4.2.1.11		0	0	0	0	0	0	0.00995867	0.00946522	0.00865239	0.0036735	0.00365631	0
ENO_MYCS5 Enolase OS=Mycoplasma synoviae (strain 53) GN=eno PE=3 SV=1	root	K01689	4.2.1.11		0	0	0	0.00466242	0	0	0.00497934	0.00946522	0	0	0.00365631	0
ENO_YERPY Enolase OS=Yersinia pseudotuberculosis serotype O:3 (strain YPIII) GN=eno PE=3 SV=1	root	K01689	4.2.1.11		0.525603	0.431661	0.463038	0.484891	0.484984	0.463925	0.667231	0.684651	0.605667	0.36735	0.489945	0.436347
ENO_YARLI Enolase OS=Yarrowia lipolytica (strain CLIB 122 / E 150) GN=ENO PE=3 SV=1	root	K01689	4.2.1.11		0.0325115	0.0234599	0.0167363	0.0372993	0.0373065	0.0331375	0.0497934	0.0567913	0.043262	0.0257145	0.0329068	0.0229656
ENO_GEOLS Enolase OS=Geobacter lovleyi (strain ATCC BAA-1151 / DSM 17278 / SZ) GN=eno PE=3 SV=1	root	K01689	4.2.1.11		0.189651	0.154835	0.156206	0.186497	0.167879	0.175155	0.293781	0.328127	0.281203	0.14694	0.175503	0.137794
ENO_THEPX Enolase OS=Thermoanaerobacter sp. (strain X514) GN=eno PE=3 SV=1	root	K01689	4.2.1.11		0.146302	0.112607	0.13389	0.13521	0.135236	0.146752	0.229049	0.242941	0.211984	0.088164	0.135283	0.0765521
ENO_FINM2 Enolase OS=Finegoldia magna (strain ATCC 29328) GN=eno PE=3 SV=1	root	K01689	4.2.1.11		0.308859	0.239291	0.251045	0.279745	0.261145	0.2651	0.497934	0.514277	0.480208	0.260818	0.321755	0.222001
EDD_ZYMMO Phosphogluconate dehydratase OS=Zymomonas mobilis subsp. mobilis (strain ATCC 31821 / ZM4 / CP4) GN=edd PE=3 SV=2	Zymomonas mobilis subsp. mobilis ZM4 = ATCC 31821	K01690	4.2.1.12		0	0	0	0	0	0	0	0	0	0	0	0
NNR_THEAS Bifunctional NAD(P)H-hydrate repair enzyme Nnr OS=Thermanaerovibrio acidaminovorans (strain ATCC 49978 / DSM 6589 / Su883) GN=nnr PE=3 SV=1	Thermanaerovibrio acidaminovorans DSM 6589	K17758 K17759	4.2.1.136 5.1.99.6		0	0	0	0	0.00466331	0	0	0	0	0	0	0
MG: Short-chain-enoyl-CoA hydratase OS=Clostridium acetobutylicum (strain ATCC 824 / DSM 792 / JCM 1419 / LMG 5710 / VKM B-1787) GN=crt PE=1 SV=1 [P52046] Score: 372.0	Clostridium acetobutylicum ATCC 824	K01715	4.2.1.150		0	0	0	0	0	0	0	0	0	0	0	0
TAGAD_SALTY L-talarate/galactarate dehydratase OS=Salmonella typhimurium (strain LT2 / SGSC1412 / ATCC 700720) GN=STM3697 PE=1 SV=1	Salmonella enterica subsp. enterica serovar Typhimurium str. LT2	K20023	4.2.1.156 4.2.1.42		0	0	0	0.00466242	0	0.00473393	0	0	0	0	0	0
FADJ_SALPB Fatty acid oxidation complex subunit alpha OS=Salmonella paratyphi B (strain ATCC BAA-1250 / SPB7) GN=fadJ PE=3 SV=1	Salmonella enterica subsp. enterica	K01782	4.2.1.17 5.1.2.3 1.1.1.35		0	0	0	0	0	0	0	0	0	0	0	0
FADB_PSEPU Fatty acid oxidation complex subunit alpha OS=Pseudomonas putida GN=fadB PE=3 SV=2	Pseudomonas putida	-	4.2.1.17 5.1.2.3 5.3.3.8 1.1.1.35		0	0	0	0	0	0	0	0	0	0.0036735	0	0
AIM1_ARATH Peroxisomal fatty acid beta-oxidation multifunctional protein AIM1 OS=Arabidopsis thaliana GN=AIM1 PE=1 SV=1	Arabidopsis thaliana	K10527	4.2.1.17 5.1.2.3 5.3.3.8 1.1.1.35		0	0	0	0	0	0	0	0	0	0	0.00365631	0
HIS7_ZYGBA Imidazoleglycerol-phosphate dehydratase OS=Zygosaccharomyces bailii GN=HIS3 PE=2 SV=1	Zygosaccharomyces bailii	-	4.2.1.19		0	0	0	0	0	0	0	0	0	0.0036735	0	0
FUMC_AGRFC Fumarate hydratase class II OS=Agrobacterium fabrum (strain C58 / ATCC 33970) GN=fumC PE=3 SV=2	Agrobacterium fabrum str. C58	K01679	4.2.1.2		0.00541859	0	0	0	0	0	0	0	0	0	0.00365631	0
TRPB_CHLTR Tryptophan synthase beta chain OS=Chlamydia trachomatis (strain D/UW-3/Cx) GN=trpB PE=3 SV=1	Chlamydia trachomatis D/UW-3/CX	K01696	4.2.1.20		0	0	0	0	0	0	0	0	0	0	0	0
TRPA_CHLP8 Tryptophan synthase alpha chain OS=Chlorobaculum parvum (strain NCIB 8327) GN=trpA PE=3 SV=1	Chlorobaculum parvum NCIB 8327	K01695	4.2.1.20		0	0	0	0	0	0	0	0	0.0043262	0	0	0
TRPA_NEIMB Tryptophan synthase alpha chain OS=Neisseria meningitidis serogroup B (strain MC58) GN=trpA PE=3 SV=1	Neisseria	K01695	4.2.1.20		0.00541859	0	0	0	0	0	0	0	0	0	0	0
TRPB_SHEAM Tryptophan synthase beta chain OS=Shewanella amazonensis (strain ATCC BAA-1098 / SB2B) GN=trpB PE=3 SV=1	Shewanella	K01696	4.2.1.20		0	0	0	0	0	0	0	0	0.0043262	0	0	0
TRPB_SHELP Tryptophan synthase beta chain OS=Shewanella loihica (strain ATCC BAA-1088 / PV-4) GN=trpB PE=3 SV=1	Shewanella	K01696	4.2.1.20		0	0	0	0	0	0	0.00497934	0	0	0	0	0
HEM2_ORYSJ Delta-aminolevulinic acid dehydratase, chloroplastic OS=Oryza sativa subsp. japonica GN=HEMB PE=2 SV=1	Poaceae	-	4.2.1.24		0	0	0	0	0	0	0	0	0	0	0	0
PDUD_SALTY Propanediol dehydratase medium subunit OS=Salmonella typhimurium (strain LT2 / SGSC1412 / ATCC 700720) GN=pduD PE=1 SV=1	Salmonella enterica subsp. enterica serovar Typhimurium str. LT2	K13919	4.2.1.28		0	0	0	0	0	0	0	0	0	0	0	0
ACNA_COREF Aconitate hydratase A OS=Corynebacterium efficiens (strain DSM 44549 / YS-314 / AJ 12310 / JCM 11189 / NBRC 100395) GN=acn PE=3 SV=2	Corynebacterium efficiens YS-314	K01681	4.2.1.3 4.2.1.99		0	0.00469197	0	0	0	0	0	0	0	0	0	0
ACNA_RICBR Aconitate hydratase A OS=Rickettsia bellii (strain RML369-C) GN=acnA PE=3 SV=1	Rickettsia	K01681	4.2.1.3 4.2.1.99		0	0.00469197	0	0	0	0	0	0	0	0	0	0
LEUC_NITSB 3-isopropylmalate dehydratase large subunit OS=Nitratiruptor sp. (strain SB155-2) GN=leuC PE=3 SV=1	Nitratiruptor sp. SB155-2	K01703	4.2.1.33		0	0	0	0	0	0	0	0.00315507	0	0.0036735	0	0
LEUC1_THEMA 3-isopropylmalate dehydratase large subunit 1 OS=Thermotoga maritima (strain ATCC 43589 / MSB8 / DSM 3109 / JCM 10099) GN=leuC1 PE=3 SV=1	Thermotoga maritima MSB8	K01703	4.2.1.33		0	0	0	0	0	0	0	0	0	0	0	0
LEUC_DINSH 3-isopropylmalate dehydratase large subunit OS=Dinoroseobacter shibae (strain DSM 16493 / NCIMB 14021 / DFL 12) GN=leuC PE=3 SV=1	Bacteria	K01703	4.2.1.33		0	0	0	0	0	0	0	0	0	0	0	0
GUDD_ECOLI Glucarate dehydratase OS=Escherichia coli (strain K12) GN=gudD PE=1 SV=2	Escherichia coli	K01706	4.2.1.40		0	0	0	0.0279745	0.00466331	0.00946786	0	0	0.0043262	0.007347	0.00731261	0
MG: dTDP-glucose 4,6-dehydratase OS=Streptococcus mutans serotype c (strain ATCC 700610 / UA159) GN=rmlB PE=1 SV=2 [P95780] Score: 394.0	Streptococcus mutans UA159	K01710	4.2.1.46		0	0	0	0	0	0	0	0	0	0	0	0
MG: dTDP-glucose 4,6-dehydratase OS=Xanthomonas campestris pv. campestris (strain B100) GN=rfbB PE=3 SV=1 [B0RVL0] Score: 319.0	Xanthomonas campestris pv. campestris str. B100	K01710	4.2.1.46		0	0	0	0	0	0	0.00497934	0	0	0	0	0
OLHYD_MACCJ Oleate hydratase OS=Macrococcus caseolyticus (strain JCSC5402) GN=MCCL_0076 PE=1 SV=1	Macrococcus caseolyticus JCSC5402	K10254	4.2.1.53		0	0	0	0	0	0	0	0	0	0	0	0
FABZ_SHISS 3-hydroxyacyl-[acyl-carrier-protein] dehydratase FabZ OS=Shigella sonnei (strain Ss046) GN=fabZ PE=3 SV=1	Shigella sonnei Ss046	K02372	4.2.1.59		0	0	0	0	0	0	0	0	0.0043262	0	0	0
TOXC_COCCA Putative fatty acid synthase subunit TOXC OS=Cochliobolus carbonum GN=TOXC PE=3 SV=1	Eukaryota	-	4.2.1.59 1.3.1.9 2.3.1.38 2.3.1.39 3.1.2.14		0.0108372	0.0140759	0	0	0.0186532	0.00946786	0.00497934	0.00946522	0	0.007347	0.00731261	0
DGOD_VEREI D-galactonate dehydratase OS=Verminephrobacter eiseniae (strain EF01-2) GN=dgoD PE=3 SV=1	Verminephrobacter eiseniae EF01-2	K01684	4.2.1.6		0	0	0	0	0	0	0	0	0	0	0	0
PSUG_NOCSJ Pseudouridine-5-phosphate glycosidase OS=Nocardioides sp. (strain BAA-499 / JS614) GN=psuG PE=3 SV=1	Nocardioides sp. JS614	K16329	4.2.1.70		0	0	0	0	0	0	0	0	0	0	0	0
UXUA_STRA1 Mannonate dehydratase OS=Streptococcus agalactiae serotype Ia (strain ATCC 27591 / A909 / CDC SS700) GN=uxuA PE=3 SV=1	Streptococcus agalactiae	K01686	4.2.1.8		0	0	0	0	0	0	0	0	0	0	0.00365631	0
UXUA_ECOLC Mannonate dehydratase OS=Escherichia coli (strain ATCC 8739 / DSM 1576 / Crooks) GN=uxuA PE=3 SV=1	Escherichia	K01686	4.2.1.8		0	0.00469197	0	0.00466242	0.00466331	0.00473393	0	0	0	0.0036735	0	0.0038276
ILVD_SULSY Dihydroxy-acid dehydratase OS=Sulfurihydrogenibium sp. (strain YO3AOP1) GN=ilvD PE=3 SV=1	Sulfurihydrogenibium sp. YO3AOP1	K01687	4.2.1.9		0	0	0	0	0	0	0	0	0	0	0.00365631	0
ILVD_CLOB8 Dihydroxy-acid dehydratase OS=Clostridium beijerinckii (strain ATCC 51743 / NCIMB 8052) GN=ilvD PE=3 SV=1	Clostridium	K01687	4.2.1.9		0	0	0	0	0	0	0	0	0	0	0.00365631	0
ILVD_PELUB Dihydroxy-acid dehydratase OS=Pelagibacter ubique (strain HTCC1062) GN=ilvD PE=3 SV=1	Candidatus Pelagibacter ubique HTCC1062	K01687	4.2.1.9		0	0	0	0	0	0	0	0	0	0	0.00365631	0
ILVD_ACIB3 Dihydroxy-acid dehydratase OS=Acinetobacter baumannii (strain AB307-0294) GN=ilvD PE=3 SV=1	Acinetobacter baumannii	K01687	4.2.1.9		0	0	0	0	0	0	0	0	0	0	0	0.0038276
C74A2_ORYSJ Allene oxide synthase 2 OS=Oryza sativa subsp. japonica GN=CYP74A2 PE=2 SV=2	Oryza sativa Japonica Group	K01723	4.2.1.92		0	0	0.00557877	0	0	0	0	0	0	0	0	0
PHS_BORPA Putative pterin-4-alpha-carbinolamine dehydratase OS=Bordetella parapertussis (strain 12822 / ATCC BAA-587 / NCTC 13253) GN=BPP3671 PE=3 SV=2	Bordetella	K01724	4.2.1.96		0	0	0	0	0	0	0	0	0	0	0	0
PHS_LEGPA Putative pterin-4-alpha-carbinolamine dehydratase OS=Legionella pneumophila (strain Paris) GN=lpp1980 PE=3 SV=1	Legionella pneumophila str. Paris	K01724	4.2.1.96		0	0	0	0	0	0.00473393	0	0	0	0	0	0
NANL_MACDE Anhydrosialidase OS=Macrobdella decora PE=1 SV=1	Macrobdella decora	-	4.2.2.15		0	0	0	0	0	0	0	0	0	0	0	0
MLTF_PSEMY Membrane-bound lytic murein transglycosylase F OS=Pseudomonas mendocina (strain ymp) GN=mltF PE=3 SV=1	Pseudomonas	K18691	4.2.2.n1		0	0	0	0	0	0	0	0	0	0	0	0
MG: Methylglyoxal synthase OS=Bacillus halodurans (strain ATCC BAA-125 / DSM 18197 / FERM 7344 / JCM 9153 / C-125) GN=mgsA PE=3 SV=1 [Q9KC92] Score: 176.0	Bacillus halodurans C-125	K01734	4.2.3.3		0	0	0	0	0	0	0	0	0.0043262	0	0	0
MGSA_CELJU Methylglyoxal synthase OS=Cellvibrio japonicus (strain Ueda107) GN=mgsA PE=3 SV=1	Cellvibrio japonicus Ueda107	K01734	4.2.3.3		0	0	0	0	0	0	0	0	0	0	0	0
AROB_STRP2 3-dehydroquinate synthase OS=Streptococcus pneumoniae serotype 2 (strain D39 / NCTC 7466) GN=aroB PE=3 SV=1	Streptococcus	K01735	4.2.3.4		0	0	0	0	0	0	0	0	0	0	0	0
AROB_ECO8A 3-dehydroquinate synthase OS=Escherichia coli O8 (strain IAI1) GN=aroB PE=3 SV=1	Enterobacteriaceae	K01735	4.2.3.4		0	0	0	0.0139873	0.00932662	0	0	0	0	0	0	0
ARO1_NEOFI Pentafunctional AROM polypeptide OS=Neosartorya fischeri (strain ATCC 1020 / DSM 3700 / FGSC A1164 / NRRL 181) GN=aroM PE=3 SV=1	Neosartorya fischeri NRRL 181	K13830	4.2.3.4 2.5.1.19 2.7.1.71 4.2.1.10 1.1.1.25		0	0.00469197	0	0	0	0	0	0	0	0	0	0
AFSY1_CUCME Alpha-farnesene synthase OS=Cucumis melo PE=1 SV=1	Cucumis melo	-	4.2.3.46		0	0	0	0	0	0	0	0	0	0.0036735	0	0
AROC_NOSS1 Chorismate synthase OS=Nostoc sp. (strain PCC 7120 / UTEX 2576) GN=aroC PE=3 SV=1	Nostoc sp. PCC 7120	K01736	4.2.3.5		0	0	0	0	0	0	0	0	0	0	0.00365631	0
AROC_DESAG Chorismate synthase OS=Desulfovibrio alaskensis (strain G20) GN=aroC PE=3 SV=1	Desulfovibrio alaskensis G20	K01736	4.2.3.5		0	0	0	0	0	0	0.00497934	0	0	0	0	0
APLF_DROME Aprataxin and PNK-like factor OS=Drosophila melanogaster GN=CG6171 PE=1 SV=1	Drosophila melanogaster	K13295	4.2.99.18		0	0	0	0	0	0	0	0	0	0	0	0
RS3_AMBME 40S ribosomal protein S3 OS=Ambystoma mexicanum GN=RPS3 PE=2 SV=1	Eukaryota	-	4.2.99.18		0	0	0	0	0	0	0	0	0	0	0	0
G1MF88_AILME Uncharacterized protein (Fragment) OS=Ailuropoda melanoleuca GN=RPS3 PE=3 SV=1	Eukaryota	K02985	4.2.99.18		0	0	0	0	0	0	0	0	0	0	0	0
ASPA_ECOL6 Aspartate ammonia-lyase OS=Escherichia coli O6:H1 (strain CFT073 / ATCC 700928 / UPEC) GN=aspA PE=3 SV=1	Escherichia coli	K01744	4.3.1.1		0	0	0.0167363	0	0	0	0.268884	0.258716	0.27255	0.22041	0.201097	0.275588
ASPA_HAEIN Aspartate ammonia-lyase OS=Haemophilus influenzae (strain ATCC 51907 / DSM 11121 / KW20 / Rd) GN=aspA PE=3 SV=1	Gammaproteobacteria	K01744	4.3.1.1		0	0	0	0	0	0	0.014938	0.0189304	0.0173048	0.0110205	0.0146252	0.0229656
ASPA_CORGL Aspartate ammonia-lyase OS=Corynebacterium glutamicum (strain ATCC 13032 / DSM 20300 / JCM 1318 / LMG 3730 / NCIMB 10025) GN=aspA PE=3 SV=2	Bacteria	K01744	4.3.1.1		0	0	0	0	0	0	0	0	0.0043262	0	0	0.0114828
ASPA_PSEFL Aspartate ammonia-lyase OS=Pseudomonas fluorescens GN=aspA PE=3 SV=1	Bacteria	-	4.3.1.1		0	0	0	0	0	0	0.014938	0.0189304	0.021631	0.007347	0.00731261	0.019138
SDHD_FUSNN Probable D-serine dehydratase OS=Fusobacterium nucleatum subsp. nucleatum (strain ATCC 25586 / CIP 101130 / JCM 8532 / LMG 13131) GN=dsdA PE=3 SV=1	Fusobacterium nucleatum subsp. nucleatum ATCC 25586	K01753	4.3.1.18		0	0	0	0	0	0	0	0	0	0.0036735	0	0
SDHD_CITK8 D-serine dehydratase OS=Citrobacter koseri (strain ATCC BAA-895 / CDC 4225-83 / SGSC4696) GN=dsdA PE=3 SV=1	Citrobacter koseri ATCC BAA-895	K01753	4.3.1.18		0	0	0	0	0	0	0	0	0	0	0	0
RAPL_STRHY L-lysine cyclodeaminase OS=Streptomyces hygroscopicus GN=rapL PE=1 SV=1	Streptomyces hygroscopicus	-	4.3.1.28		0	0	0	0	0	0	0	0	0	0	0	0
HUTH_RHIME Histidine ammonia-lyase OS=Rhizobium meliloti (strain 1021) GN=hutH PE=2 SV=2	Sinorhizobium meliloti 1021	K01745	4.3.1.3		0	0	0	0	0	0	0	0	0	0	0	0
ARLY_PELPB Argininosuccinate lyase OS=Pelodictyon phaeoclathratiforme (strain DSM 5477 / BU-1) GN=argH PE=3 SV=1	Pelodictyon phaeoclathratiforme BU-1	K01755	4.3.2.1		0	0	0	0	0	0	0	0.00315507	0	0	0	0
ARLY_JANSC Argininosuccinate lyase OS=Jannaschia sp. (strain CCS1) GN=argH PE=3 SV=1	Jannaschia sp. CCS1	K01755	4.3.2.1		0	0	0	0	0	0	0	0.00315507	0	0	0	0.0038276
ARLY_CHESB Argininosuccinate lyase OS=Chelativorans sp. (strain BNC1) GN=argH PE=3 SV=1	Alphaproteobacteria	K01755	4.3.2.1		0	0	0	0	0	0	0	0.00315507	0	0	0	0
ARLY1_PSEPF Argininosuccinate lyase 1 OS=Pseudomonas fluorescens (strain Pf0-1) GN=argH1 PE=3 SV=1	Pseudomonas fluorescens Pf0-1	K01755	4.3.2.1		0	0	0	0	0	0	0	0	0	0	0	0
PUR8_STRMU Adenylosuccinate lyase OS=Streptococcus mutans serotype c (strain ATCC 700610 / UA159) GN=purB PE=3 SV=2	Streptococcus mutans UA159	K01756	4.3.2.2		0	0	0	0	0	0.00473393	0	0	0	0	0	0
MG: Adenylosuccinate lyase OS=Staphylococcus aureus (strain USA300) GN=purB PE=3 SV=1 [Q2FFI7] Score: 551.0	Bacilli	K01756	4.3.2.2		0	0	0	0	0	0	0	0	0	0	0	0
PDXT_BACLD Pyridoxal 5-phosphate synthase subunit PdxT OS=Bacillus licheniformis (strain ATCC 14580 / DSM 13 / JCM 2505 / NBRC 12200 / NCIMB 9375 / NRRL NRS-1264 / Gibson 46) GN=pdxT PE=3 SV=1	Bacillus licheniformis DSM 13 = ATCC 14580	K08681	4.3.3.6 3.5.1.2		0	0	0	0	0	0	0	0	0	0	0	0
DAPA_STRR6 4-hydroxy-tetrahydrodipicolinate synthase OS=Streptococcus pneumoniae (strain ATCC BAA-255 / R6) GN=dapA PE=3 SV=1	Streptococcus	K01714	4.3.3.7		0	0	0	0	0	0	0	0	0	0	0	0
DAPA_STRTD 4-hydroxy-tetrahydrodipicolinate synthase OS=Streptococcus thermophilus (strain ATCC BAA-491 / LMD-9) GN=dapA PE=3 SV=1	Streptococcus	K01714	4.3.3.7		0	0	0	0	0	0	0	0	0	0	0	0
MG: 4-hydroxy-tetrahydrodipicolinate synthase 1 OS=Clostridium acetobutylicum (strain ATCC 824 / DSM 792 / JCM 1419 / LMG 5710 / VKM B-1787) GN=dapA1 PE=3 SV=1 [Q97GI9] Score: 149.0	Clostridium acetobutylicum ATCC 824	K01714	4.3.3.7		0	0	0.00557877	0	0	0	0	0.00631014	0.0043262	0.0036735	0.00731261	0.0038276
MG: 4-hydroxy-tetrahydrodipicolinate synthase OS=Caldanaerobacter subterraneus subsp. tengcongensis (strain DSM 15242 / JCM 11007 / NBRC 100824 / MB4) GN=dapA PE=3 SV=1 [Q8RBI5] Score: 186.0	Clostridia	K01714	4.3.3.7		0	0	0	0	0	0	0	0.00315507	0	0.0036735	0	0
MG: 4-hydroxy-tetrahydrodipicolinate synthase OS=Clostridium tetani (strain Massachusetts / E88) GN=dapA PE=3 SV=1 [Q891S3] Score: 387.0	Clostridia	K01714	4.3.3.7		0	0	0	0	0	0	0	0.00315507	0	0.0036735	0.00365631	0
DAPA_ACIET 4-hydroxy-tetrahydrodipicolinate synthase OS=Acidovorax ebreus (strain TPSY) GN=dapA PE=3 SV=1	Acidovorax ebreus TPSY	K01714	4.3.3.7		0	0	0	0	0	0	0	0	0	0	0	0
DCYD_YERPN D-cysteine desulfhydrase OS=Yersinia pestis bv. Antiqua (strain Nepal516) GN=dcyD PE=3 SV=1	Yersinia	K05396	4.4.1.15		0	0	0	0	0	0	0	0	0	0	0	0
LUXS_CLOB8 S-ribosylhomocysteine lyase OS=Clostridium beijerinckii (strain ATCC 51743 / NCIMB 8052) GN=luxS PE=3 SV=1	Clostridium beijerinckii NCIMB 8052	K07173	4.4.1.21		0	0	0	0	0	0	0	0	0	0	0	0
LUXS_SALAR S-ribosylhomocysteine lyase OS=Salmonella arizonae (strain ATCC BAA-731 / CDC346-86 / RSK2980) GN=luxS PE=3 SV=1	Enterobacteriaceae	K07173	4.4.1.21		0	0	0	0	0	0	0	0	0	0	0	0
LUXS_YERPY S-ribosylhomocysteine lyase OS=Yersinia pseudotuberculosis serotype O:3 (strain YPIII) GN=luxS PE=3 SV=1	Enterobacteriaceae	K07173	4.4.1.21		0	0	0	0	0	0	0	0	0	0	0	0
MG: Lactoylglutathione lyase OS=Neisseria meningitidis serogroup B (strain MC58) GN=gloA PE=3 SV=1 [P0A0T3] Score: 95.9	Neisseria meningitidis	K01759	4.4.1.5		0	0	0	0	0	0	0.00497934	0	0.0043262	0.0036735	0.00365631	0
LGUL_ORYSJ Lactoylglutathione lyase OS=Oryza sativa subsp. japonica GN=GLYI-11 PE=1 SV=2	Oryza sativa Japonica Group	K01759	4.4.1.5		0	0	0	0	0	0	0	0	0	0	0	0
LGUL_BRAOG Putative lactoylglutathione lyase OS=Brassica oleracea var. gemmifera PE=2 SV=1	Streptophyta	-	4.4.1.5		0	0	0	0	0	0	0	0	0	0	0	0
PCYAB_EUGGR Photoactivated adenylate cyclase subunit beta OS=Euglena gracilis GN=pacB PE=1 SV=1	Euglena gracilis	-	4.6.1.1		0	0	0	0	0	0	0	0	0	0	0	0
ISPF_BACSK 2-C-methyl-D-erythritol 2,4-cyclodiphosphate synthase OS=Bacillus clausii (strain KSM-K16) GN=ispF PE=3 SV=1	Bacillus clausii KSM-K16	K01770	4.6.1.12		0	0	0	0	0	0	0	0	0	0	0	0
HEMH_SERP5 Ferrochelatase OS=Serratia proteamaculans (strain 568) GN=hemH PE=3 SV=1	Serratia proteamaculans 568	K01772	4.99.1.1		0	0	0	0	0	0.00473393	0	0	0	0	0	0
CBIX_META3 Sirohydrochlorin cobaltochelatase OS=Methanococcus aeolicus (strain Nankai-3 / ATCC BAA-1280) GN=cbiX PE=3 SV=1	Methanococcus aeolicus Nankai-3	K03795	4.99.1.3		0	0	0	0	0	0.00473393	0	0	0	0	0	0
YBHH_ECOLI Putative isomerase YbhH OS=Escherichia coli (strain K12) GN=ybhH PE=3 SV=1	Escherichia coli	K09788	5.-.-.-		0	0	0	0	0	0	0	0	0	0	0.00731261	0
MG: Alanine racemase OS=Clostridium perfringens (strain ATCC 13124 / DSM 756 / JCM 1290 / NCIMB 6125 / NCTC 8237 / Type A) GN=alr PE=3 SV=1 [Q0TSS9] Score: 523.0	Clostridium perfringens	K01775	5.1.1.1		0	0	0	0	0	0	0	0	0	0	0	0
ALR_AZOSB Alanine racemase OS=Azoarcus sp. (strain BH72) GN=alr PE=3 SV=1	Azoarcus sp. BH72	K01775	5.1.1.1		0	0	0	0	0	0	0	0	0	0	0.00365631	0
ALR_SORC5 Alanine racemase OS=Sorangium cellulosum (strain So ce56) GN=alr PE=3 SV=1	Sorangium cellulosum So ce56	K01775	5.1.1.1		0	0	0	0	0	0	0.014938	0.00315507	0.0346096	0.051429	0.0182815	0.0038276
ALR_ARCB4 Alanine racemase OS=Arcobacter butzleri (strain RM4018) GN=alr PE=3 SV=1	Arcobacter butzleri RM4018	K01775	5.1.1.1		0	0	0	0	0	0	0.0199173	0.0252406	0.0173048	0.0110205	0.0109689	0.0153104
ALR_NITOC Alanine racemase OS=Nitrosococcus oceani (strain ATCC 19707 / NCIMB 11848) GN=alr PE=3 SV=1	Nitrosococcus oceani ATCC 19707	K01775	5.1.1.1		0	0	0	0.00466242	0	0	0	0	0	0	0.00731261	0
CEFD_STRC2 Isopenicillin N epimerase OS=Streptomyces clavuligerus (strain ATCC 27064 / DSM 738 / JCM 4710 / NBRC 13307 / NCIMB 12785 / NRRL 3585 / VKM Ac-602) GN=cefD PE=1 SV=3	Streptomyces clavuligerus ATCC 27064	K04127	5.1.1.17		0	0	0	0	0	0	0	0	0	0	0	0
MURI_BIFA0 Glutamate racemase OS=Bifidobacterium animalis subsp. lactis (strain AD011) GN=murI PE=3 SV=1	root	K01776	5.1.1.3		0	0	0	0	0	0	0	0	0	0	0.00365631	0
DAPF_ELUMP Diaminopimelate epimerase OS=Elusimicrobium minutum (strain Pei191) GN=dapF PE=1 SV=1	Elusimicrobium minutum Pei191	K01778	5.1.1.7		0	0	0	0	0	0	0	0.00315507	0	0	0	0
DAPF_LEPBL Diaminopimelate epimerase OS=Leptospira borgpetersenii serovar Hardjo-bovis (strain L550) GN=dapF PE=1 SV=1	Leptospira borgpetersenii serovar Hardjo-bovis str. L550	K01778	5.1.1.7		0	0	0	0	0	0	0	0	0	0	0	0
YEAD_ECOLI Putative glucose-6-phosphate 1-epimerase OS=Escherichia coli (strain K12) GN=yeaD PE=1 SV=2	Escherichia coli K-12	K01792	5.1.3.15		0	0.00469197	0	0	0.00466331	0	0.00995867	0.00315507	0.0129786	0	0	0
MG: UDP-glucose 4-epimerase OS=Bacillus subtilis (strain 168) GN=galE PE=3 SV=1 [P55180] Score: 475.0	Bacillus subtilis subsp. subtilis str. 168	K01784	5.1.3.2		0	0	0	0	0	0	0.00497934	0	0	0	0.00365631	0
GALE_LACHE UDP-glucose 4-epimerase OS=Lactobacillus helveticus GN=galE PE=2 SV=1	Lactobacillus helveticus	-	5.1.3.2		0	0	0	0	0	0	0	0	0	0	0	0
GALE_ECOLI UDP-glucose 4-epimerase OS=Escherichia coli (strain K12) GN=galE PE=1 SV=1	Escherichia coli K-12	K01784	5.1.3.2		0	0	0	0	0.00466331	0	0	0.00315507	0.00865239	0.0036735	0.00365631	0
HLDD_AERS4 ADP-L-glycero-D-manno-heptose-6-epimerase OS=Aeromonas salmonicida (strain A449) GN=hldD PE=3 SV=1	Aeromonas	K03274	5.1.3.20		0	0	0	0	0	0	0.00497934	0	0.0129786	0	0	0
HLDD_SALTY ADP-L-glycero-D-manno-heptose-6-epimerase OS=Salmonella typhimurium (strain LT2 / SGSC1412 / ATCC 700720) GN=hldD PE=3 SV=1	Gammaproteobacteria	K03274	5.1.3.20		0	0	0	0	0	0	0.00995867	0	0.0173048	0	0	0
HLDD_BURXL ADP-L-glycero-D-manno-heptose-6-epimerase OS=Burkholderia xenovorans (strain LB400) GN=hldD PE=3 SV=1	Proteobacteria	K03274	5.1.3.20		0	0	0	0	0	0	0	0	0.0043262	0	0	0
GALM_SHIFL Aldose 1-epimerase OS=Shigella flexneri GN=galM PE=3 SV=1	Enterobacteriaceae	K01785	5.1.3.3		0	0	0	0	0	0	0	0	0	0	0	0
NANE_STAAN Putative N-acetylmannosamine-6-phosphate 2-epimerase OS=Staphylococcus aureus (strain N315) GN=nanE PE=1 SV=1	Staphylococcus aureus subsp. aureus	K01788	5.1.3.9		0.00541859	0.0140759	0	0.00466242	0	0.00473393	0	0	0	0	0	0
NANE_STACT Putative N-acetylmannosamine-6-phosphate 2-epimerase OS=Staphylococcus carnosus (strain TM300) GN=nanE PE=3 SV=1	Staphylococcus carnosus subsp. carnosus TM300	K01788	5.1.3.9		0	0.00469197	0.00557877	0.00466242	0.00466331	0	0	0	0	0	0	0
NANEK_BRUSU Bifunctional enzyme NanE/NanK OS=Brucella suis biovar 1 (strain 1330) GN=nanEK PE=3 SV=1	Brucella suis 1330	K13967	5.1.3.9 2.7.1.60		0	0	0	0	0	0	0	0	0.0043262	0	0	0
NNRE_DEHLB NAD(P)H-hydrate epimerase OS=Dehalogenimonas lykanthroporepellens (strain ATCC BAA-1523 / JCM 15061 / BL-DC-9) GN=nnrE PE=3 SV=1	Dehalogenimonas lykanthroporepellens BL-DC-9	-	5.1.99.6		0	0	0	0	0	0	0	0	0	0.0036735	0	0
TIG_CHLCH Trigger factor OS=Chlorobium chlorochromatii (strain CaD3) GN=tig PE=3 SV=1	Chlorobium chlorochromatii CaD3	K03545	5.2.1.8		0.00541859	0	0	0	0	0	0	0	0	0	0	0
MG: Peptidyl-prolyl cis-trans isomerase B OS=Bacillus subtilis (strain 168) GN=ppiB PE=1 SV=1 [P35137] Score: 117.0	Bacillus subtilis subsp. subtilis str. 168	K03768	5.2.1.8		0	0	0	0	0	0	0	0.00315507	0	0	0.00365631	0
TIG_STRP1 Trigger factor OS=Streptococcus pyogenes serotype M1 GN=tig PE=3 SV=2	Streptococcus	K03545	5.2.1.8		0	0	0	0	0	0	0	0	0	0	0	0
TIG_STRZT Trigger factor OS=Streptococcus pneumoniae (strain Taiwan19F-14) GN=tig PE=3 SV=1	Streptococcus	K03545	5.2.1.8		0	0	0	0	0	0	0	0	0	0	0	0
TIG_LISIN Trigger factor OS=Listeria innocua serovar 6a (strain CLIP 11262) GN=tig PE=3 SV=1	Bacilli	K03545	5.2.1.8		0	0	0	0	0	0	0	0	0	0	0	0
TIG_STRSV Trigger factor OS=Streptococcus sanguinis (strain SK36) GN=tig PE=3 SV=1	Bacilli	K03545	5.2.1.8		0	0	0	0	0	0	0	0	0	0	0	0
MG: Trigger factor OS=Clostridium botulinum (strain Eklund 17B / Type B) GN=tig PE=3 SV=1 [B2TPC0] Score: 522.0	Clostridium botulinum	K03545	5.2.1.8		0	0	0	0	0	0	0.00497934	0.00315507	0.00865239	0	0	0
MG: Foldase protein PrsA OS=Caldanaerobacter subterraneus subsp. tengcongensis (strain DSM 15242 / JCM 11007 / NBRC 100824 / MB4) GN=prsA PE=3 SV=1 [Q8R760] Score: 124.0	Thermoanaerobacter tengcongensis MB4	K07533	5.2.1.8		0	0	0	0	0	0	0.00497934	0.00315507	0.0043262	0.0036735	0.00365631	0
TIG_RHOPT Trigger factor OS=Rhodopseudomonas palustris (strain TIE-1) GN=tig PE=3 SV=1	Rhodopseudomonas palustris TIE-1	K03545	5.2.1.8		0	0	0	0	0	0	0	0	0.0043262	0	0	0
TIG_JANSC Trigger factor OS=Jannaschia sp. (strain CCS1) GN=tig PE=3 SV=1	Jannaschia sp. CCS1	K03545	5.2.1.8		0	0	0	0	0	0	0	0	0	0	0	0.0038276
TIG_SYNFM Trigger factor OS=Syntrophobacter fumaroxidans (strain DSM 10017 / MPOB) GN=tig PE=3 SV=1	Syntrophobacter fumaroxidans MPOB	K03545	5.2.1.8		0	0	0	0.00466242	0	0	0	0	0	0	0	0
MG: Trigger factor OS=Campylobacter lari (strain RM2100 / D67 / ATCC BAA-1060) GN=tig PE=3 SV=1 [B9KDZ7] Score: 604.0	Campylobacter	K03545	5.2.1.8		0	0	0	0	0	0	0	0	0	0	0	0
SURA_SHEON Chaperone SurA OS=Shewanella oneidensis (strain MR-1) GN=surA PE=3 SV=1	Shewanella oneidensis MR-1	K03771	5.2.1.8		0	0.00469197	0	0.00466242	0	0	0	0.00315507	0.021631	0.0036735	0.0182815	0.0114828
SURA_ALKEH Chaperone SurA OS=Alkalilimnicola ehrlichii (strain ATCC BAA-1101 / DSM 17681 / MLHE-1) GN=surA PE=3 SV=1	Alkalilimnicola ehrlichii MLHE-1	K03771	5.2.1.8		0	0	0	0	0.00466331	0	0	0	0	0	0	0
PPID_ECOLI Peptidyl-prolyl cis-trans isomerase D OS=Escherichia coli (strain K12) GN=ppiD PE=1 SV=1	Escherichia coli	K03770	5.2.1.8		0	0	0	0	0	0	0	0	0	0	0.00365631	0
FKBA_ECOLI FKBP-type peptidyl-prolyl cis-trans isomerase FkpA OS=Escherichia coli (strain K12) GN=fkpA PE=1 SV=1	Escherichia coli	K03772	5.2.1.8		0	0	0	0	0	0	0.00995867	0.00946522	0.0043262	0	0.00731261	0
PPIB_ECOLI Peptidyl-prolyl cis-trans isomerase B OS=Escherichia coli (strain K12) GN=ppiB PE=1 SV=2	Escherichia coli K-12	K03768	5.2.1.8		0	0	0	0	0	0	0	0	0	0	0	0
PPIA_SALTY Peptidyl-prolyl cis-trans isomerase A OS=Salmonella typhimurium (strain LT2 / SGSC1412 / ATCC 700720) GN=ppiA PE=3 SV=2	Enterobacteriaceae	K03767	5.2.1.8		0	0	0	0	0	0	0.00995867	0.0157754	0.0129786	0.0110205	0.0109689	0
FKBB_SHIFL FKBP-type 22 kDa peptidyl-prolyl cis-trans isomerase OS=Shigella flexneri GN=fklB PE=3 SV=2	Enterobacteriaceae	K03773	5.2.1.8		0	0	0	0	0	0	0.00497934	0.00315507	0.0043262	0	0	0
SURA_SHISS Chaperone SurA OS=Shigella sonnei (strain Ss046) GN=surA PE=3 SV=1	Enterobacteriaceae	K03771	5.2.1.8		0	0	0	0	0	0	0	0	0.0043262	0	0	0
SLYD_SHIFL FKBP-type peptidyl-prolyl cis-trans isomerase SlyD OS=Shigella flexneri GN=slyD PE=3 SV=1	Enterobacteriaceae	K03775	5.2.1.8		0	0	0	0	0	0	0	0	0	0	0	0
TIG_SALDC Trigger factor OS=Salmonella dublin (strain CT_02021853) GN=tig PE=3 SV=1	Gammaproteobacteria	K03545	5.2.1.8		0.0379301	0.0328438	0	0.0233121	0.0233165	0.0284036	0.0547727	0.0725667	0.0778715	0.014694	0.0182815	0
TIG_TREPA Trigger factor OS=Treponema pallidum (strain Nichols) GN=tig PE=3 SV=1	Treponema pallidum subsp. pallidum str. Nichols	K03545	5.2.1.8		0	0	0	0	0	0	0	0	0	0	0	0
CYPH_MAIZE Peptidyl-prolyl cis-trans isomerase OS=Zea mays GN=CYP PE=2 SV=1	Zea mays	-	5.2.1.8		0	0	0	0	0	0	0	0	0	0	0	0
PAS1_ARATH Peptidyl-prolyl cis-trans isomerase PASTICCINO1 OS=Arabidopsis thaliana GN=PAS1 PE=1 SV=2	Arabidopsis thaliana	-	5.2.1.8		0	0	0	0	0	0	0	0	0	0	0	0
TPIS_KINRD Triosephosphate isomerase OS=Kineococcus radiotolerans (strain ATCC BAA-149 / DSM 14245 / SRS30216) GN=tpiA PE=3 SV=1	Kineococcus radiotolerans SRS30216	K01803	5.3.1.1		0	0	0	0	0	0	0	0	0.0043262	0	0	0
TPIS_CHLT3 Triosephosphate isomerase OS=Chloroherpeton thalassium (strain ATCC 35110 / GB-78) GN=tpiA PE=3 SV=1	Chloroherpeton thalassium ATCC 35110	K01803	5.3.1.1		0	0	0	0.0186497	0.00932662	0.00946786	0	0	0.0043262	0	0	0
TPIS_BACSK Triosephosphate isomerase OS=Bacillus clausii (strain KSM-K16) GN=tpiA PE=3 SV=1	Bacillus	K01803	5.3.1.1		0	0	0	0	0	0	0	0	0	0	0	0
TPIS_STAEQ Triosephosphate isomerase OS=Staphylococcus epidermidis (strain ATCC 35984 / RP62A) GN=tpiA PE=3 SV=1	Staphylococcus epidermidis	K01803	5.3.1.1		0	0	0	0	0	0	0	0	0	0	0	0
TPIS_LACGA Triosephosphate isomerase OS=Lactobacillus gasseri (strain ATCC 33323 / DSM 20243 / JCM 1131 / NCIMB 11718 / AM63) GN=tpiA PE=3 SV=1	Lactobacillus	K01803	5.3.1.1		0	0	0	0	0	0	0	0	0	0	0	0
TPIS_STRPF Triosephosphate isomerase OS=Streptococcus pyogenes serotype M4 (strain MGAS10750) GN=tpiA PE=3 SV=1	Bacilli	K01803	5.3.1.1		0.0108372	0.00938394	0.0111575	0	0	0	0.029876	0.0220855	0.0173048	0.0183675	0.0292505	0
TPIS_STRA5 Triosephosphate isomerase OS=Streptococcus agalactiae serotype V (strain ATCC BAA-611 / 2603 V/R) GN=tpiA PE=3 SV=1	Bacilli	K01803	5.3.1.1		0.0162558	0.00938394	0.0111575	0	0	0	0.0199173	0.0157754	0.0173048	0.0183675	0.0182815	0.00765521
TPIS_BRASB Triosephosphate isomerase OS=Bradyrhizobium sp. (strain BTAi1 / ATCC BAA-1182) GN=tpiA PE=3 SV=1	Bradyrhizobium sp. BTAi1	K01803	5.3.1.1		0	0	0	0	0	0	0	0.00315507	0	0.0036735	0	0
TPIS_ECOL5 Triosephosphate isomerase OS=Escherichia coli O6:K15:H31 (strain 536 / UPEC) GN=tpiA PE=3 SV=1	Enterobacteriaceae	K01803	5.3.1.1		0.0270929	0.0469197	0.0223151	0.0512866	0.0559597	0.0568072	0.059752	0.0473261	0.0562405	0.0330615	0.0255941	0.0114828
TPIS_BLOFL Triosephosphate isomerase OS=Blochmannia floridanus GN=tpiA PE=3 SV=1	Gammaproteobacteria	K01803	5.3.1.1		0	0	0	0.00466242	0	0	0	0	0.0043262	0	0	0
TPIS_ACIAD Triosephosphate isomerase OS=Acinetobacter baylyi (strain ATCC 33305 / BD413 / ADP1) GN=tpiA PE=3 SV=1	Gammaproteobacteria	K01803	5.3.1.1		0	0	0	0.00466242	0	0	0	0	0.0043262	0	0	0
TPIS_PHYAS Triosephosphate isomerase OS=Phytoplasma australiense GN=tpiA PE=3 SV=1	Candidatus Phytoplasma australiense	K01803	5.3.1.1		0	0	0	0.00466242	0	0	0	0	0.0043262	0	0	0
TPIS_MYCPU Triosephosphate isomerase OS=Mycoplasma pulmonis (strain UAB CTIP) GN=tpiA PE=3 SV=1	Mycoplasma pulmonis UAB CTIP	-	5.3.1.1		0	0	0	0	0	0	0.014938	0.0126203	0.0173048	0.007347	0.0146252	0
TPIS_BUCAI Triosephosphate isomerase OS=Buchnera aphidicola subsp. Acyrthosiphon pisum (strain APS) GN=tpiA PE=3 SV=1	Bacteria	K01803	5.3.1.1		0	0	0	0.00466242	0	0	0	0	0.0043262	0	0	0
TPIS_BACTN Triosephosphate isomerase OS=Bacteroides thetaiotaomicron (strain ATCC 29148 / DSM 2079 / NCTC 10582 / E50 / VPI-5482) GN=tpiA PE=3 SV=1	Bacteria	K01803	5.3.1.1		0	0	0	0.0233121	0.00932662	0.0142018	0	0	0.0043262	0	0	0.00765521
TPIS_SHEB9 Triosephosphate isomerase OS=Shewanella baltica (strain OS195) GN=tpiA PE=3 SV=1	Bacteria	K01803	5.3.1.1		0	0	0	0.00466242	0	0	0	0	0.0043262	0	0	0
TPIS_PORGI Triosephosphate isomerase OS=Porphyromonas gingivalis (strain ATCC BAA-308 / W83) GN=tpiA PE=3 SV=1	Bacteria	K01803	5.3.1.1		0	0	0	0.00466242	0	0	0	0	0	0	0	0
TPIS_MYCHY Triosephosphate isomerase OS=Mycoplasma hyopneumoniae GN=tpiA PE=3 SV=1	Bacteria	-	5.3.1.1		0	0	0	0	0	0	0	0	0.0043262	0	0	0
TPIC_ARATH Triosephosphate isomerase, chloroplastic OS=Arabidopsis thaliana GN=TIM PE=1 SV=1	Eukaryota	K01803	5.3.1.1		0	0	0	0	0	0	0	0	0	0	0	0
TPISB_DANRE Triosephosphate isomerase B OS=Danio rerio GN=tpi1b PE=2 SV=1	Eukaryota	K01803	5.3.1.1		0	0	0	0	0	0	0	0	0	0	0	0
TPIS_LACSA Triosephosphate isomerase, cytosolic (Fragment) OS=Lactuca sativa PE=2 SV=1	Streptophyta	-	5.3.1.1		0	0	0	0	0	0	0	0	0	0	0	0
TPIS_ORYSJ Triosephosphate isomerase, cytosolic OS=Oryza sativa subsp. japonica GN=TPI PE=1 SV=3	Streptophyta	K01803	5.3.1.1		0	0	0	0	0	0	0	0	0	0	0	0
TPIS_HORVU Triosephosphate isomerase, cytosolic OS=Hordeum vulgare PE=1 SV=3	Streptophyta	-	5.3.1.1		0	0	0	0	0	0	0	0	0	0	0	0
TPIS_COPJA Triosephosphate isomerase, cytosolic OS=Coptis japonica PE=2 SV=1	Streptophyta	-	5.3.1.1		0	0	0	0	0	0	0	0	0	0	0	0
TPIS_SECCE Triosephosphate isomerase, cytosolic OS=Secale cereale PE=2 SV=3	Streptophyta	-	5.3.1.1		0	0	0	0	0	0	0	0	0	0	0	0
MG: Triosephosphate isomerase OS=Clostridium perfringens (strain SM101 / Type A) GN=tpiA PE=3 SV=1 [Q0STD6] Score: 436.0	root	K01803	5.3.1.1		0	0	0	0	0	0	0.059752	0.0631014	0.0519143	0.036735	0.0365631	0.0229656
TPIS_PARBA Triosephosphate isomerase OS=Paracoccidioides lutzii (strain ATCC MYA-826 / Pb01) GN=TPI1 PE=1 SV=3	root	K01803	5.3.1.1		0	0	0	0.0139873	0.00932662	0.00946786	0.0248967	0.0252406	0.0173048	0.0110205	0.0146252	0.0038276
TPIS_CLOBA Triosephosphate isomerase OS=Clostridium botulinum (strain Alaska E43 / Type E3) GN=tpiA PE=3 SV=1	root	K01803	5.3.1.1		0	0	0	0.0139873	0.00932662	0.00946786	0.0398347	0.0473261	0.0302834	0.0183675	0.0255941	0.0038276
MG: Uronate isomerase OS=Escherichia coli O157:H7 (strain EC4115 / EHEC) GN=uxaC PE=3 SV=1 [B5YRY4] Score: 491.0	Escherichia coli	K01812	5.3.1.12		0.00541859	0.00469197	0.0111575	0.0139873	0.00932662	0.0142018	0.00995867	0.0126203	0.0129786	0.014694	0.0182815	0.0153104
HIS4_LACCB 1-(5-phosphoribosyl)-5-[(5-phosphoribosylamino)methylideneamino] imidazole-4-carboxamide isomerase OS=Lactobacillus casei (strain BL23) GN=hisA PE=3 SV=1	Lactobacillus casei BL23	K01814	5.3.1.16		0	0	0	0	0	0	0	0	0	0	0	0
HIS4_CLOB8 1-(5-phosphoribosyl)-5-[(5-phosphoribosylamino)methylideneamino] imidazole-4-carboxamide isomerase OS=Clostridium beijerinckii (strain ATCC 51743 / NCIMB 8052) GN=hisA PE=3 SV=1	Clostridium beijerinckii NCIMB 8052	K01814	5.3.1.16		0	0	0	0	0	0	0	0	0	0	0	0
HIS4_RHOCS 1-(5-phosphoribosyl)-5-[(5-phosphoribosylamino)methylideneamino] imidazole-4-carboxamide isomerase OS=Rhodospirillum centenum (strain ATCC 51521 / SW) GN=hisA PE=3 SV=1	Rhodospirillum centenum SW	K01814	5.3.1.16		0	0	0	0	0.00466331	0	0	0.00631014	0	0.007347	0	0
KDUI_PARPJ 4-deoxy-L-threo-5-hexosulose-uronate ketol-isomerase OS=Paraburkholderia phytofirmans (strain DSM 17436 / LMG 22146 / PsJN) GN=kduI PE=3 SV=1	Burkholderia phytofirmans PsJN	K01815	5.3.1.17		0	0	0	0	0	0.00473393	0	0	0	0	0	0
MTNA_NEUCR Methylthioribose-1-phosphate isomerase OS=Neurospora crassa (strain ATCC 24698 / 74-OR23-1A / CBS 708.71 / DSM 1257 / FGSC 987) GN=mri-1 PE=3 SV=1	Neurospora crassa OR74A	K08963	5.3.1.23		0	0	0	0	0	0	0.00497934	0	0.0043262	0	0.0109689	0
FUCI_SALCH L-fucose isomerase OS=Salmonella choleraesuis (strain SC-B67) GN=fucI PE=3 SV=1	Enterobacteriaceae	K01818	5.3.1.25		0.00541859	0	0.00557877	0.0139873	0.00466331	0.00946786	0.00497934	0.00315507	0.00865239	0.044082	0.0585009	0.0688969
GMHA_ECOLU Phosphoheptose isomerase OS=Escherichia coli O17:K52:H18 (strain UMN026 / ExPEC) GN=gmhA PE=3 SV=1	Enterobacteriaceae	K03271	5.3.1.28		0	0	0	0	0	0	0	0.00315507	0	0	0	0
GMHA_SALEP Phosphoheptose isomerase OS=Salmonella enteritidis PT4 (strain P125109) GN=gmhA PE=3 SV=1	Enterobacteriaceae	K03271	5.3.1.28		0	0	0	0	0	0	0	0.00315507	0	0	0	0
RUBPS_METBU Putative ribose 1,5-bisphosphate isomerase OS=Methanococcoides burtonii (strain DSM 6242 / NBRC 107633 / OCM 468 / ACE-M) GN=Mbur_2109 PE=3 SV=1	Methanococcoides burtonii DSM 6242	K03146	5.3.1.29		0	0	0	0	0	0	0	0.00315507	0	0	0	0
SQUS_ECOLI Sulfoquinovose isomerase OS=Escherichia coli (strain K12) GN=yihS PE=1 SV=2	Escherichia coli K-12	K18479	5.3.1.31		0	0	0	0	0	0	0	0	0	0.0110205	0.00731261	0
SQUS_SALTY Sulfoquinovose isomerase OS=Salmonella typhimurium (strain LT2 / SGSC1412 / ATCC 700720) GN=yihS PE=1 SV=1	Salmonella enterica subsp. enterica serovar Typhimurium str. LT2	K18479	5.3.1.31		0	0	0	0	0	0.00473393	0	0	0	0	0	0
ARAA_ACIC1 L-arabinose isomerase OS=Acidothermus cellulolyticus (strain ATCC 43068 / 11B) GN=araA PE=3 SV=1	Acidothermus cellulolyticus 11B	K01804	5.3.1.4		0	0	0	0	0	0	0	0	0	0	0	0
ARAA_LACPL L-arabinose isomerase OS=Lactobacillus plantarum (strain ATCC BAA-793 / NCIMB 8826 / WCFS1) GN=araA PE=3 SV=1	Lactobacillus plantarum WCFS1	K01804	5.3.1.4		0	0	0	0	0	0	0	0	0	0	0	0
ARAA_SHIFL L-arabinose isomerase OS=Shigella flexneri GN=araA PE=3 SV=1	Enterobacteriaceae	K01804	5.3.1.4		0	0	0	0	0	0.00946786	0.029876	0.0220855	0.0562405	0.0110205	0.0511883	0.0421037
XYLA_LISW6 Xylose isomerase OS=Listeria welshimeri serovar 6b (strain ATCC 35897 / DSM 20650 / SLCC5334) GN=xylA PE=3 SV=1	Listeria welshimeri serovar 6b str. SLCC5334	K01805	5.3.1.5		0	0.00469197	0	0	0	0	0	0.00315507	0.0043262	0.0036735	0	0
XYLA_LACPE Xylose isomerase OS=Lactobacillus pentosus GN=xylA PE=3 SV=1	Lactobacillus	-	5.3.1.5		0	0.00469197	0.00557877	0	0.00466331	0	0	0	0	0	0	0
XYLA_OCHA4 Xylose isomerase OS=Ochrobactrum anthropi (strain ATCC 49188 / DSM 6882 / NCTC 12168) GN=xylA PE=3 SV=1	Rhizobiales	K01805	5.3.1.5		0	0	0	0.00466242	0	0	0.0348554	0.0378609	0.0259572	0.0183675	0.0182815	0.0114828
XYLA_RHISN Xylose isomerase OS=Rhizobium sp. (strain NGR234) GN=xylA PE=3 SV=1	Rhizobiales	K01805	5.3.1.5		0	0	0	0.00466242	0	0	0.0348554	0.0378609	0.0259572	0.0183675	0.0182815	0.0114828
XYLA_SHIB3 Xylose isomerase OS=Shigella boydii serotype 18 (strain CDC 3083-94 / BS512) GN=xylA PE=3 SV=1	Enterobacteriaceae	K01805	5.3.1.5		0	0.00469197	0	0.0419618	0.0186532	0.0331375	0.144401	0.141978	0.116807	0.0771435	0.0804388	0.0803797
XYLA_SHIBS Xylose isomerase OS=Shigella boydii serotype 4 (strain Sb227) GN=xylA PE=3 SV=1	Enterobacteriaceae	K01805	5.3.1.5		0	0.00469197	0	0.0419618	0.0186532	0.0331375	0.144401	0.141978	0.116807	0.0771435	0.0804388	0.0803797
XYLA_YERPY Xylose isomerase OS=Yersinia pseudotuberculosis serotype O:3 (strain YPIII) GN=xylA PE=3 SV=1	Enterobacteriaceae	K01805	5.3.1.5		0	0	0	0.0139873	0.0139899	0.0142018	0.0398347	0.0283956	0.043262	0.0183675	0.0255941	0.019138
RPIA_STRU0 Ribose-5-phosphate isomerase A OS=Streptococcus uberis (strain ATCC BAA-854 / 0140J) GN=rpiA PE=3 SV=1	Streptococcus uberis 0140J	K01807	5.3.1.6		0	0	0	0	0	0	0	0	0	0	0	0
RPIA_KLEP7 Ribose-5-phosphate isomerase A OS=Klebsiella pneumoniae subsp. pneumoniae (strain ATCC 700721 / MGH 78578) GN=rpiA PE=3 SV=1	Enterobacteriaceae	K01807	5.3.1.6		0	0	0	0	0	0	0	0	0	0	0	0
MG: Ribose-5-phosphate isomerase A OS=Escherichia coli O7:K1 (strain IAI39 / ExPEC) GN=rpiA PE=3 SV=1 [B7NHX4] Score: 200.0	Enterobacteriaceae	K01807	5.3.1.6		0	0	0	0	0	0	0	0	0	0	0	0
[truncated: 2,999 more rows]
