# Supplementary material for: Lignocellulose Fermentation Products Generated by Giant Panda Gut Microbiomes Depend Ultimately on pH Rather than Portion of Bamboo: A Preliminary Study
Source: Microorganisms. 2022 May 7;10(5):978. doi: 10.3390/microorganisms10050978 (PMC9146640; doi:10.3390/microorganisms10050978)
Supplement: Supplementary file 1 [file microorganisms-10-00978-s001.zip › Table S5 Enriched Taxa.xlsx]

## Sheet: Table S5A
	Table S5A. Total reads and relative abundance of the predominant microbial OTUs as assessed by 16 rDNA amplicon sequences in in vitro incubation tests with microbial communities in dung (Time zero) and in fermentation vessels (Time end) after 52 hours of cultivation. Either microbial community derived from stools made of about 70% green and 30% yellow dung (G70:Y30). Some cultures were provided w…																																		Tested conditions	Inoculum +Leaf vs. Inoculum			De-H2O Inoculum +Leaf vs. Inoculum +Leaf
								Total reads														Relative abundance													Aim of the comparison	Impact of bamboo addition in the presenc of soluble organics			Impact of dewatering, thus forcing bamboo degradation
								Dung			Inoculum +Leaf			Inoculum			De-H2O Inoculum +Leaf					Dung			Inoculum +Leaf			Inoculum			De-H2O Inoculum +Leaf
	OTU	Phylum	Class	Order	Family	Genus	Replicate	1	2	3	1	2	3	1	2	3	1	2	3			1	2	3	1	2	3	1	2	3	1	2	3			TTEST	log2 FC		TTEST	log2 FC
	Otu00014	Bacteroidetes(100)	Bacteroidia(100)	Bacteroidales(100)	Porphyromonadaceae(100)	Parabacteroides		0	0	0	0	0	0	0	0	0	1065	502	699			0	0	0	0	0	0	0	0	0	3.04442	3.23017	3.8487			-	-		0.00515082	-
	Otu00007	Bacteroidetes(100)	Bacteroidia(100)	Bacteroidales(100)	Bacteroidaceae(100)	Bacteroides		0	0	0	0	0	0	4585	796	2780	9268	3815	5963			0	0	0	0	0	0	23.3274	13.5259	19.1065	26.4936	24.548	32.8323			0.0223818	-		0.00790782	-
	Otu00016	Firmicutes(100)	Clostridia(100)	Clostridiales(100)	Lachnospiraceae(100)	Clostridium_XlVa		0	0	0	1	1	2	21	39	20	1260	569	686			0	0	0	0.0207641	0.0117647	0.0242014	0.106843	0.662702	0.137457	3.60185	3.66128	3.77712			0.25673	-3.99892		0.000184208	7.60444
	Otu00025	Proteobacteria(100)	Gammaproteobacteria(100)	Enterobacteriales(100)	Enterobacteriaceae(100)	unclassified		5	14	11	3	5	5	107	82	130	929	462	370			0.22007	0.137782	0.245262	0.0622924	0.0588235	0.0605034	0.544391	1.39337	0.893471	2.65565	2.97278	2.03722			0.0697634	-3.96244		0.0119084	5.39942
	Otu00019	Proteobacteria(100)	Gammaproteobacteria(100)	Enterobacteriales(100)	Enterobacteriaceae(100)	Morganella		2	11	9	2	13	10	186	139	163	715	318	339			0.0880282	0.108257	0.200669	0.0415282	0.152941	0.121007	0.946324	2.36194	1.12027	2.04391	2.0462	1.86653			0.0906222	-3.81123		7.62186e-05	4.2389
	Otu00021	Proteobacteria(100)	Gammaproteobacteria(100)	Pasteurellales(100)	Pasteurellaceae(100)	unclassified		80	227	84	5	14	10	522	227	454	706	246	276			3.52113	2.23403	1.87291	0.103821	0.164706	0.121007	2.65581	3.85726	3.12027	2.01818	1.58291	1.51966			0.0124687	-4.62822		0.00902111	3.71654
	Otu00001	Proteobacteria(100)	Gammaproteobacteria(100)	Enterobacteriales(100)	Enterobacteriaceae(100)	Escherichia/Shigella		1548	6317	3853	310	1018	892	836	591	726	6528	2786	3822			68.1338	62.1691	85.9086	6.43688	11.9765	10.7938	4.25337	10.0425	4.98969	18.661	17.9268	21.0439			0.253519	0.598802		0.0145476	0.980542
	Otu00002	Firmicutes(100)	Negativicutes(100)	Selenomonadales(100)	Veillonellaceae(100)	Veillonella		2	8	0	4340	7152	7066	12683	3615	9717	13018	5496	5143			0.0880282	0.0787324	0	90.1163	84.1412	85.5034	64.5281	61.4274	66.7835	37.2134	35.3645	28.3174			0.000802854	0.430536		0.000206997	-1.36432
	Otu00004	Firmicutes(100)	Clostridia(100)	Clostridiales(100)	Clostridiaceae_1(100)	Clostridium_sensu_stricto		336	2220	307	55	126	107	273	138	196	95	89	27			14.7887	21.8482	6.84504	1.14203	1.48235	1.29477	1.38896	2.34494	1.34708	0.271568	0.572679	0.148662			0.357431	-0.374566		0.00438214	-1.98081
	Otu00029	Proteobacteria(100)	Deltaproteobacteria(100)	Desulfovibrionales(100)	Desulfovibrionaceae(100)	Desulfovibrio		0	0	0	0	1	0	116	63	94	305	99	311			0	0	0	0	0.0117647	0	0.590181	1.07052	0.646048	0.871877	0.637025	1.71237			0.0370503	-7.61525		0.0818098	8.09702
	Otu00006	Firmicutes(100)	Bacilli(100)	Lactobacillales(100)	Leuconostocaceae(100)	Leuconostoc		183	899	114	4	6	2	102	27	61	68	13	36			8.05458	8.84755	2.54181	0.0830565	0.0705882	0.0242014	0.518952	0.458794	0.419244	0.194386	0.0836497	0.198216			0.000755857	-2.97362		0.100824	1.42109
	Otu00003	Firmicutes(100)	Bacilli(100)	Lactobacillales(100)	Streptococcaceae(100)	Streptococcus		11	115	20	12	23	23	13	35	23	422	426	131			0.484155	1.13178	0.445931	0.249169	0.270588	0.278316	0.0661409	0.594732	0.158076	1.20633	2.74114	0.721286			0.96986	-0.0372523		0.168153	2.54845
	Otu00013	unclassified(100)	unclassified(100)	unclassified(100)	unclassified(100)	unclassified		8	31	8	1	0	2	11	1	2	0	0	0			0.352113	0.305088	0.178372	0.0207641	0	0.0242014	0.0559654	0.0169924	0.0137457	0	0	0			0.433754	-0.947272		0.185879	-
	Otu00030	Firmicutes(100)	Bacilli(100)	Lactobacillales(100)	Enterococcaceae(100)	Enterococcus		0	4	0	5	21	28	11	28	18	123	73	51			0	0.0393662	0	0.103821	0.247059	0.338819	0.0559654	0.475786	0.123711	0.351609	0.469725	0.280806			0.942969	0.0734521		0.195689	0.676271
	Otu00042	Firmicutes(100)	Bacilli(100)	Lactobacillales(100)	Leuconostocaceae(100)	Weissella		25	67	2	0	2	4	0	0	1	0	0	0			1.10035	0.659384	0.0445931	0	0.0235294	0.0484027	0	0	0.00687285	0	0	0			0.259173	3.38766		0.228335	-
	Otu00012	Firmicutes(100)	Negativicutes(100)	Selenomonadales(100)	Acidaminococcaceae(100)	Acidaminococcus		0	0	0	0	0	0	0	0	0	0	418	0			0	0	0	0	0	0	0	0	0	0	2.68966	0			-	-		0.42265	-
	Otu00022	Firmicutes(100)	Bacilli(100)	Lactobacillales(100)	Streptococcaceae(100)	Lactococcus		1	1	0	7	29	18	8	0	6	46	47	8			0.0440141	0.00984155	0	0.145349	0.341176	0.217812	0.0407021	0	0.0412371	0.131496	0.302426	0.044048			0.0611981	3.10364		0.474641	-0.559347
	Otu00011	Firmicutes(100)	Erysipelotrichia(100)	Erysipelotrichales(100)	Erysipelotrichaceae(100)	Turicibacter		33	105	25	2	8	2	14	6	7	25	18	7			1.45246	1.03336	0.557414	0.0415282	0.0941176	0.0242014	0.0712287	0.101954	0.04811	0.0714653	0.115823	0.038542			0.481074	-0.469263		0.513633	0.498543
	Otu00047	Firmicutes(100)	Clostridia(100)	Clostridiales(100)	Lachnospiraceae(100)	Cellulosilyticum		0	0	0	0	0	0	21	11	24	0	0	0			0	0	0	0	0	0	0.106843	0.186916	0.164948	0	0	0			0.023547	-		-	-
							Reads enriched OTUs	2234	10019	4433	4747	8419	8171	19509	5798	14422	34573	15377	17869		Relative abundance	98.3275	98.3275	98.3275	98.3275	98.3275	98.3275	98.3275	98.3275	98.3275	98.3275	98.3275	98.3275
							Total reads	2272	10161	4485	4816	8500	8264	19655	5885	14550	34982	15541	18162

## Sheet: Table S5B
	Table S5B. Total reads and relative abundance of the predominant microbial OTUs as assessed by 16 rDNA amplicon sequences in in vitro incubation tests with microbial communities derived from stools made of about 70% green and 30% yellow dung. Cultures had their pH around 6.5 (naturally) or adjusted to 4.5 (artificially). Experiments lasted 52 hours of cultivation (Time end). Cultures were provide…																						Tested conditions	Inoculum +Leaf pH 4.5 vs. 6.5
								Total reads								Relative abundance							Aim of the comparison	Impact of pH decrease on fermentation
								Inoculum +Leaf (pH 6.5)			Inoculum +Leaf (pH 4.5)					Inoculum +Leaf (pH 6.5)			Inoculum +Leaf (pH 4.5)
	OTU	Phylum	Class	Order	Family	Genus	Replicate	1	2	3	1	2	3			1	2	3	1	2	3		Biological Function	TTEST	log2 FC
	Otu00001	Proteobacteria(100)	Gammaproteobacteria(100)	Enterobacteriales(100)	Enterobacteriaceae(100)	Escherichia/Shigella		310	1018	892	692	594	1576			6.43688	11.9765	10.7938	5.43641	7.04794	8.8435			0.265055	-0.453584
	Otu00002	Firmicutes(100)	Negativicutes(100)	Selenomonadales(100)	Veillonellaceae(100)	Veillonella		4340	7152	7066	0	0	0			90.1163	84.1412	85.5034	0	0	0			0.000435696	-
	Otu00003	Firmicutes(100)	Bacilli(100)	Lactobacillales(100)	Streptococcaceae(100)	Streptococcus		12	23	23	3951	2834	6891			0.249169	0.270588	0.278316	31.0394	33.626	38.6679			0.0042668	7.01657
	Otu00004	Firmicutes(100)	Clostridia(100)	Clostridiales(100)	Clostridiaceae_1(100)	Clostridium_sensu_stricto		55	126	107	3652	2814	6198			1.14203	1.48235	1.29477	28.714	33.3887	34.7848			0.00341417	4.6277
	Otu00006	Firmicutes(100)	Bacilli(100)	Lactobacillales(100)	Leuconostocaceae(100)	Leuconostoc		4	6	2	2073	747	1327			0.0830565	0.0705882	0.0242014	16.2856	8.86331	7.44627			0.0587255	7.51789
	Otu00011	Firmicutes(100)	Erysipelotrichia(100)	Erysipelotrichales(100)	Erysipelotrichaceae(100)	Turicibacter		2	8	2	549	270	963			0.0415282	0.0941176	0.0242014	4.31299	3.20361	5.40374			0.0214792	6.33681
	Otu00017	Firmicutes(100)	Bacilli(100)	Lactobacillales(100)	Lactobacillaceae(100)	Lactobacillus		0	0	0	1223	1031	638			0	0	0	13.0804	13.1585	3.89989			0.0822071	-
	Otu00019	Proteobacteria(100)	Gammaproteobacteria(100)	Enterobacteriales(100)	Enterobacteriaceae(100)	Morganella		2	13	10	0	0	0			0.0415282	0.152941	0.121007	0	0	0			0.086534	-
	Otu00020	Proteobacteria(100)	Epsilonproteobacteria(100)	Campylobacterales(100)	Helicobacteraceae(100)	Helicobacter		0	0	0	26	11	53			0	0	0	0.204258	0.130517	0.297402			0.048698	-
	Otu00021	Proteobacteria(100)	Gammaproteobacteria(100)	Pasteurellales(100)	Pasteurellaceae(100)	unclassified		5	14	10	2	0	0			0.103821	0.164706	0.121007	0.0157122	0	0			0.0147677	-4.63179
	Otu00022	Firmicutes(100)	Bacilli(100)	Lactobacillales(100)	Streptococcaceae(100)	Lactococcus		7	29	18	7	3	7			0.145349	0.341176	0.217812	0.0549925	0.0355956	0.0392795			0.0771965	-2.43922
	Otu00028	Firmicutes(100)	Bacilli(100)	Lactobacillales(100)	Lactobacillaceae(100)	Lactobacillus		0	0	0	441	76	54			0	0	0	3.46453	0.901756	0.303013			0.249652	-
	Otu00030	Firmicutes(100)	Bacilli(100)	Lactobacillales(100)	Enterococcaceae(100)	Enterococcus		5	21	28	7	1	11			0.103821	0.247059	0.338819	0.0549925	0.0118652	0.0617249			0.105079	-2.42327
							Reads enriched OTUs	4742	8410	8158	12623	8381	17718		Relative abundance	98.4635	98.9412	98.7173	99.1673	99.4423	99.422
							Total reads	4816	8500	8264	12729	8428	17821
