# Supplementary material for: Lignocellulose Fermentation Products Generated by Giant Panda Gut Microbiomes Depend Ultimately on pH Rather than Portion of Bamboo: A Preliminary Study
Source: Microorganisms. 2022 May 7;10(5):978. doi: 10.3390/microorganisms10050978 (PMC9146640; doi:10.3390/microorganisms10050978)
Supplement: Supplementary file 1 [file microorganisms-10-00978-s001.zip › Table S6 All 16S data.xlsx]

## Sheet: Table S6
	Table S6. Total reads and relative abundance of 16 rRNA gene amplicon sequences in fecal microbial communities in dung (Time zero) and in fermentation vessels (Time end) after 52 hours of cultivation. In parenthesis, the numbers represent the percentage of identification for each taxa.
								Total reads																Relative abundance
								Dung			Inoculum +Leaf (pH 6.5)			Inoculum			De-H2O Inoculum +Leaf			Inoculum +Leaf (pH 4.5)				Dung			Inoculum +Leaf (pH 6.5)			Inoculum			De-H2O Inoculum +Leaf			Inoculum +Leaf (pH 4.5)
							OTUs per sample	33	84	45	66	71	88	140	68	113	247	149	217	97	51	95
	OTU	Phylum	Class	Order	Family	Genus	Replicate	1	2	3	1	2	3	1	2	3	1	2	3	1	2	3		1	2	3	1	2	3	1	2	3	1	2	3	1	2	3
	Otu00001	Proteobacteria(100)	Gammaproteobacteria(100)	Enterobacteriales(100)	Enterobacteriaceae(100)	Escherichia/Shigella(100)		1548	6317	3853	310	1018	892	836	591	726	6528	2786	3822	692	594	1576		68.1338	62.1691	85.9086	6.43688	11.9765	10.7938	4.25337	10.0425	4.98969	18.661	17.9268	21.0439	5.43641	7.04794	8.8435
	Otu00004	Firmicutes(100)	Clostridia(100)	Clostridiales(100)	Clostridiaceae_1(100)	Clostridium_sensu_stricto(99)		336	2217	306	13	24	26	49	53	65	34	53	12	3652	2814	6198		14.7887	21.8187	6.82274	0.269934	0.282353	0.314618	0.2493	0.900595	0.446735	0.0971928	0.341033	0.066072	28.6904	33.3887	34.7792
	Otu00006	Firmicutes(100)	Bacilli(100)	Lactobacillales(100)	Leuconostocaceae(100)	Leuconostoc(100)		183	899	114	4	6	2	102	27	61	68	13	36	2073	747	1327		8.05458	8.84755	2.54181	0.0830565	0.0705882	0.0242014	0.518952	0.458794	0.419244	0.194386	0.0836497	0.198216	16.2856	8.86331	7.44627
	Otu00024	Proteobacteria(100)	Gammaproteobacteria(100)	Pasteurellales(100)	Pasteurellaceae(100)	unclassified(100)		79	225	84	5	13	9	521	227	453	15	3	6	2	0	0		3.47711	2.21435	1.87291	0.103821	0.152941	0.108906	2.65073	3.85726	3.1134	0.0428792	0.0193038	0.033036	0.0157122	0	0
	Otu00011	Firmicutes(100)	Erysipelotrichia(100)	Erysipelotrichales(100)	Erysipelotrichaceae(100)	Turicibacter(100)		33	105	25	2	8	2	14	6	7	25	18	7	549	270	963		1.45246	1.03336	0.557414	0.0415282	0.0941176	0.0242014	0.0712287	0.101954	0.04811	0.0714653	0.115823	0.038542	4.31299	3.20361	5.40374
	Otu00042	Firmicutes(100)	Bacilli(100)	Lactobacillales(100)	Leuconostocaceae(100)	Weissella(100)		25	67	2	0	2	4	0	0	1	0	0	0	0	0	1		1.10035	0.659384	0.0445931	0	0.0235294	0.0484027	0	0	0.00687285	0	0	0	0	0	0.00561136
	Otu00038	Firmicutes(100)	Bacilli(100)	Lactobacillales(100)	Streptococcaceae(100)	Streptococcus(100)		23	75	10	10	21	16	11	30	23	29	15	7	0	2	0		1.01232	0.738116	0.222965	0.207641	0.247059	0.193611	0.0559654	0.509771	0.158076	0.0828998	0.0965189	0.038542	0	0.0237304	0
	Otu00003	Firmicutes(100)	Bacilli(100)	Lactobacillales(100)	Streptococcaceae(100)	Streptococcus(100)		9	71	10	4	12	16	5	26	15	412	414	123	3951	2834	6890		0.396127	0.69875	0.222965	0.0830565	0.141176	0.193611	0.0254388	0.441801	0.103093	1.17775	2.66392	0.677238	31.0394	33.626	38.6623
	Otu00013	unclassified(100)	unclassified(100)	unclassified(100)	unclassified(100)	unclassified(100)		8	31	8	1	0	2	11	1	2	0	0	0	2	1	3		0.352113	0.305088	0.178372	0.0207641	0	0.0242014	0.0559654	0.0169924	0.0137457	0	0	0	0.0157122	0.0118652	0.0168341
	Otu00002	Firmicutes(100)	Negativicutes(100)	Selenomonadales(100)	Veillonellaceae(100)	Veillonella(100)		2	8	0	4294	6906	6960	12496	3558	9597	8224	3263	3369	0	0	0		0.0880282	0.0787324	0	89.1611	81.2471	84.2207	63.5767	60.4588	65.9588	23.5092	20.9961	18.5497	0	0	0
	Otu00019	Proteobacteria(100)	Gammaproteobacteria(100)	Enterobacteriales(100)	Enterobacteriaceae(100)	Morganella(100)		2	11	9	2	13	10	186	139	163	715	318	339	0	0	0		0.0880282	0.108257	0.200669	0.0415282	0.152941	0.121007	0.946324	2.36194	1.12027	2.04391	2.0462	1.86653	0	0	0
	Otu00025	Proteobacteria(100)	Gammaproteobacteria(100)	Enterobacteriales(100)	Enterobacteriaceae(100)	unclassified(100)		2	7	3	1	2	1	15	5	12	520	283	207	0	0	0		0.0880282	0.0688909	0.0668896	0.0207641	0.0235294	0.0121007	0.0763165	0.0849618	0.0824742	1.48648	1.82099	1.13974	0	0	0
	Otu00044	Firmicutes(100)	Bacilli(100)	Lactobacillales(100)	Streptococcaceae(100)	Streptococcus(100)		2	44	10	8	11	7	8	9	8	10	12	8	0	0	1		0.0880282	0.433028	0.222965	0.166113	0.129412	0.0847047	0.0407021	0.152931	0.0549828	0.0285861	0.0772151	0.044048	0	0	0.00561136
	Otu00021	Proteobacteria(100)	Gammaproteobacteria(100)	Pasteurellales(100)	Pasteurellaceae(100)	unclassified(100)		1	2	0	0	1	1	1	0	1	691	243	270	0	0	0		0.0440141	0.0196831	0	0	0.0117647	0.0121007	0.00508776	0	0.00687285	1.9753	1.56361	1.48662	0	0	0
	Otu00034	Proteobacteria(100)	Gammaproteobacteria(100)	Enterobacteriales(100)	Enterobacteriaceae(100)	unclassified(97)		1	2	6	1	2	2	27	27	33	236	98	75	0	0	0		0.0440141	0.0196831	0.133779	0.0207641	0.0235294	0.0242014	0.13737	0.458794	0.226804	0.674633	0.63059	0.41295	0	0	0
	Otu00040	Proteobacteria(100)	Gammaproteobacteria(100)	Enterobacteriales(100)	Enterobacteriaceae(100)	unclassified(100)		1	4	0	0	1	2	40	35	64	66	36	33	0	0	1		0.0440141	0.0393662	0	0	0.0117647	0.0242014	0.203511	0.594732	0.439863	0.188668	0.231645	0.181698	0	0	0.00561136
	Otu00037	Proteobacteria(100)	Gammaproteobacteria(100)	Enterobacteriales(100)	Enterobacteriaceae(100)	unclassified(93)		1	1	2	1	0	0	25	15	21	107	45	55	1	1	0		0.0440141	0.00984155	0.0445931	0.0207641	0	0	0.127194	0.254885	0.14433	0.305872	0.289557	0.30283	0.00785608	0.0118652	0
	Otu00022	Firmicutes(100)	Bacilli(100)	Lactobacillales(100)	Streptococcaceae(100)	Lactococcus(100)		1	0	0	7	29	18	7	0	6	46	47	8	7	3	7		0.0440141	0	0	0.145349	0.341176	0.217812	0.0356143	0	0.0412371	0.131496	0.302426	0.044048	0.0549925	0.0355956	0.0392795
	Otu00257	Proteobacteria(100)	Gammaproteobacteria(100)	Enterobacteriales(100)	Enterobacteriaceae(100)	unclassified(100)		1	1	0	0	0	0	0	0	0	2	0	0	0	0	0		0.0440141	0.00984155	0	0	0	0	0	0	0	0.00571723	0	0	0	0	0
	Otu00060	Proteobacteria(100)	Alphaproteobacteria(100)	Rhizobiales(100)	unclassified(100)	unclassified(100)		1	0	1	0	0	0	0	0	0	0	1	0	0	0	0		0.0440141	0	0.0222965	0	0	0	0	0	0	0	0.00643459	0	0	0	0
	Otu00311	Firmicutes(100)	Bacilli(100)	Lactobacillales(100)	Streptococcaceae(100)	Streptococcus(100)		1	1	0	0	0	0	0	0	0	0	1	0	0	0	0		0.0440141	0.00984155	0	0	0	0	0	0	0	0	0.00643459	0	0	0	0
	Otu00354	Proteobacteria(100)	Gammaproteobacteria(100)	Enterobacteriales(100)	Enterobacteriaceae(100)	Providencia(100)		1	1	0	0	0	0	0	1	0	0	0	0	0	0	0		0.0440141	0.00984155	0	0	0	0	0	0.0169924	0	0	0	0	0	0	0
	Otu00327	unclassified(100)	unclassified(100)	unclassified(100)	unclassified(100)	unclassified(100)		1	0	0	0	0	0	0	1	0	0	0	0	0	0	0		0.0440141	0	0	0	0	0	0	0.0169924	0	0	0	0	0	0	0
	Otu00539	Acidobacteria(100)	Acidobacteria_Gp4(100)	Gp4(100)	unclassified(100)	unclassified(100)		1	1	0	0	0	0	0	0	0	0	0	0	0	0	0		0.0440141	0.00984155	0	0	0	0	0	0	0	0	0	0	0	0	0
	Otu00074	Proteobacteria(100)	Alphaproteobacteria(100)	Rhizobiales(100)	Methylobacteriaceae(100)	Methylobacterium(100)		1	0	0	0	0	0	0	0	0	0	0	0	0	0	0		0.0440141	0	0	0	0	0	0	0	0	0	0	0	0	0	0
	Otu00114	Firmicutes(100)	Clostridia(100)	Clostridiales(100)	Clostridiaceae_1(100)	Clostridium_sensu_stricto(100)		1	0	0	0	0	0	0	0	0	0	0	0	0	0	0		0.0440141	0	0	0	0	0	0	0	0	0	0	0	0	0	0
	Otu00854	Firmicutes(100)	Clostridia(100)	Clostridiales(100)	unclassified(100)	unclassified(100)		1	0	0	0	0	0	0	0	0	0	0	0	0	0	0		0.0440141	0	0	0	0	0	0	0	0	0	0	0	0	0	0
	Otu00855	Firmicutes(100)	Clostridia(100)	Clostridiales(100)	Clostridiaceae_1(100)	unclassified(100)		1	0	0	0	0	0	0	0	0	0	0	0	0	0	0		0.0440141	0	0	0	0	0	0	0	0	0	0	0	0	0	0
	Otu01173	Proteobacteria(100)	Betaproteobacteria(100)	Burkholderiales(100)	Oxalobacteraceae(100)	unclassified(100)		1	0	0	0	0	0	0	0	0	0	0	0	0	0	0		0.0440141	0	0	0	0	0	0	0	0	0	0	0	0	0	0
	Otu01771	Proteobacteria(100)	Gammaproteobacteria(100)	Enterobacteriales(100)	Enterobacteriaceae(100)	Escherichia/Shigella(100)		1	0	0	0	0	0	0	0	0	0	0	0	0	0	0		0.0440141	0	0	0	0	0	0	0	0	0	0	0	0	0	0
	Otu02037	Proteobacteria(100)	Gammaproteobacteria(100)	Enterobacteriales(100)	Enterobacteriaceae(100)	Escherichia/Shigella(100)		1	0	0	0	0	0	0	0	0	0	0	0	0	0	0		0.0440141	0	0	0	0	0	0	0	0	0	0	0	0	0	0
	Otu02058	Proteobacteria(100)	Gammaproteobacteria(100)	Enterobacteriales(100)	Enterobacteriaceae(100)	unclassified(100)		1	0	0	0	0	0	0	0	0	0	0	0	0	0	0		0.0440141	0	0	0	0	0	0	0	0	0	0	0	0	0	0
	Otu02335	Firmicutes(100)	Bacilli(100)	Lactobacillales(100)	Streptococcaceae(100)	Streptococcus(100)		1	0	0	0	0	0	0	0	0	0	0	0	0	0	0		0.0440141	0	0	0	0	0	0	0	0	0	0	0	0	0	0
	Otu00007	Bacteroidetes(100)	Bacteroidia(100)	Bacteroidales(100)	Bacteroidaceae(100)	Bacteroides(100)		0	0	0	0	0	0	4585	796	2780	1672	715	1341	0	0	0		0	0	0	0	0	0	23.3274	13.5259	19.1065	4.7796	4.60073	7.38355	0	0	0
	Otu00005	Firmicutes(100)	Negativicutes(100)	Selenomonadales(100)	Veillonellaceae(100)	Veillonella(100)		0	0	0	25	112	102	120	56	116	4773	2216	1752	0	0	0		0	0	0	0.519103	1.31765	1.23427	0.610532	0.951572	0.797251	13.6442	14.2591	9.64651	0	0	0
	Otu00008	Bacteroidetes(100)	Bacteroidia(100)	Bacteroidales(100)	Bacteroidaceae(100)	Bacteroides(100)		0	0	0	0	0	0	0	0	0	4456	1916	2626	0	0	0		0	0	0	0	0	0	0	0	0	12.738	12.3287	14.4588	0	0	0
	Otu00010	Bacteroidetes(100)	Bacteroidia(100)	Bacteroidales(100)	Bacteroidaceae(100)	Bacteroides(100)		0	0	0	0	0	0	0	0	0	1958	892	1338	0	0	0		0	0	0	0	0	0	0	0	0	5.59716	5.73966	7.36703	0	0	0
	Otu00017	Firmicutes(100)	Bacilli(100)	Lactobacillales(100)	Lactobacillaceae(100)	Lactobacillus(100)		0	0	0	0	0	0	0	0	0	0	0	0	1223	1031	638		0	0	0	0	0	0	0	0	0	0	0	0	9.60798	12.233	3.58005
	Otu00016	Firmicutes(100)	Clostridia(100)	Clostridiales(100)	Lachnospiraceae(100)	Clostridium_XlVa(100)		0	0	0	0	0	0	0	35	0	1260	569	686	0	0	0		0	0	0	0	0	0	0	0.594732	0	3.60185	3.66128	3.77712	0	0	0
	Otu00014	Bacteroidetes(100)	Bacteroidia(100)	Bacteroidales(100)	Porphyromonadaceae(100)	Parabacteroides(100)		0	0	0	0	0	0	0	0	0	1065	502	699	0	0	0		0	0	0	0	0	0	0	0	0	3.04442	3.23017	3.8487	0	0	0
	Otu00018	Bacteroidetes(100)	Bacteroidia(100)	Bacteroidales(100)	Bacteroidaceae(100)	Bacteroides(100)		0	0	0	0	0	0	0	0	0	1182	292	658	0	0	0		0	0	0	0	0	0	0	0	0	3.37888	1.8789	3.62295	0	0	0
	Otu00029	Proteobacteria(100)	Deltaproteobacteria(100)	Desulfovibrionales(100)	Desulfovibrionaceae(100)	Desulfovibrio(99)		0	0	0	0	1	0	116	63	94	305	99	311	0	0	0		0	0	0	0	0.0117647	0	0.590181	1.07052	0.646048	0.871877	0.637025	1.71237	0	0	0
	Otu00028	Firmicutes(100)	Bacilli(100)	Lactobacillales(100)	Lactobacillaceae(100)	Lactobacillus(100)		0	0	0	0	0	0	0	0	0	0	0	0	441	76	54		0	0	0	0	0	0	0	0	0	0	0	0	3.46453	0.901756	0.303013
	Otu00012	Firmicutes(100)	Negativicutes(100)	Selenomonadales(100)	Acidaminococcaceae(100)	Acidaminococcus(100)		0	0	0	0	0	0	0	0	0	0	401	0	0	0	0		0	0	0	0	0	0	0	0	0	0	2.58027	0	0	0	0
	Otu00030	Firmicutes(100)	Bacilli(100)	Lactobacillales(100)	Enterococcaceae(100)	Enterococcus(100)		0	4	0	5	21	28	11	28	18	123	73	51	7	1	11		0	0.0393662	0	0.103821	0.247059	0.338819	0.0559654	0.475786	0.123711	0.351609	0.469725	0.280806	0.0549925	0.0118652	0.0617249
	Otu00026	Firmicutes(100)	Clostridia(100)	Clostridiales(100)	Clostridiaceae_1(100)	Clostridium_sensu_stricto(98)		0	0	0	22	60	37	111	53	70	0	0	0	0	0	0		0	0	0	0.456811	0.705882	0.447725	0.564742	0.900595	0.4811	0	0	0	0	0	0
	Otu00015	Firmicutes(100)	Clostridia(100)	Clostridiales(100)	Clostridiaceae_1(100)	Clostridium_sensu_stricto(100)		0	1	0	20	42	44	113	32	61	1	1	0	0	0	0		0	0.00984155	0	0.415282	0.494118	0.53243	0.574917	0.543755	0.419244	0.00285861	0.00643459	0	0	0	0
	Otu00048	Firmicutes(100)	Negativicutes(100)	Selenomonadales(100)	Veillonellaceae(100)	Veillonella(100)		0	0	0	14	58	4	63	0	3	4	13	2	0	0	0		0	0	0	0.290698	0.682353	0.0484027	0.320529	0	0.0206186	0.0114345	0.0836497	0.011012	0	0	0
	Otu00045	Firmicutes(100)	Negativicutes(100)	Selenomonadales(100)	Veillonellaceae(100)	Veillonella(100)		0	0	0	7	76	0	4	1	1	17	4	20	0	0	0		0	0	0	0.145349	0.894118	0	0.0203511	0.0169924	0.00687285	0.0485964	0.0257384	0.11012	0	0	0
	Otu00031	Firmicutes(100)	Clostridia(100)	Clostridiales(100)	Clostridiaceae_1(100)	Clostridium_sensu_stricto(100)		0	2	1	0	0	0	0	0	0	57	35	15	1	0	1		0	0.0196831	0.0222965	0	0	0	0	0	0	0.162941	0.225211	0.08259	0.00785608	0	0.00561136
	Otu00020	Proteobacteria(100)	Epsilonproteobacteria(100)	Campylobacterales(100)	Helicobacteraceae(100)	Helicobacter(100)		0	0	0	0	0	0	0	0	0	3	2	1	26	11	53		0	0	0	0	0	0	0	0	0	0.00857584	0.0128692	0.005506	0.204258	0.130517	0.297402
	Otu00049	Firmicutes(100)	Clostridia(100)	Clostridiales(100)	Clostridiaceae_1(100)	Clostridium_sensu_stricto(96)		0	0	0	0	0	0	0	0	1	62	0	0	0	0	0		0	0	0	0	0	0	0	0	0.00687285	0.177234	0	0	0	0	0
	Otu00047	Firmicutes(100)	Clostridia(100)	Clostridiales(100)	Lachnospiraceae(100)	Cellulosilyticum(68)		0	0	0	0	0	0	21	11	24	0	0	0	0	0	0		0	0	0	0	0	0	0.106843	0.186916	0.164948	0	0	0	0	0	0
	Otu00027	Firmicutes(100)	Clostridia(100)	Clostridiales(100)	Lachnospiraceae(67)	Clostridium_XlVa(67)		0	0	0	1	1	2	21	4	20	0	0	0	0	0	0		0	0	0	0.0207641	0.0117647	0.0242014	0.106843	0.0679694	0.137457	0	0	0	0	0	0
	Otu00066	Bacteroidetes(100)	Bacteroidia(100)	Bacteroidales(100)	Bacteroidaceae(100)	Bacteroides(100)		0	0	0	0	0	0	0	0	0	9	1	20	0	0	0		0	0	0	0	0	0	0	0	0	0.0257275	0.00643459	0.11012	0	0	0
	Otu00061	Actinobacteria(100)	Actinobacteria(100)	Bifidobacteriales(100)	Bifidobacteriaceae(100)	Bifidobacterium(100)		0	0	0	1	2	2	0	2	0	12	5	1	0	0	0		0	0	0	0.0207641	0.0235294	0.0242014	0	0.0339847	0	0.0343034	0.032173	0.005506	0	0	0
	Otu00065	Proteobacteria(100)	Deltaproteobacteria(100)	Desulfovibrionales(100)	Desulfovibrionaceae(100)	Bilophila(100)		0	0	0	0	0	0	0	0	0	14	5	5	0	0	0		0	0	0	0	0	0	0	0	0	0.0400206	0.032173	0.02753	0	0	0
	Otu00072	Firmicutes(100)	Bacilli(100)	Lactobacillales(100)	Enterococcaceae(100)	Enterococcus(100)		0	0	0	3	4	4	2	4	2	3	0	0	0	0	0		0	0	0	0.0622924	0.0470588	0.0484027	0.0101755	0.0679694	0.0137457	0.00857584	0	0	0	0	0
	Otu00009	Firmicutes(100)	Clostridia(100)	Clostridiales(100)	Clostridiaceae_1(100)	Clostridium_sensu_stricto(100)		0	2	1	0	0	0	0	0	0	11	2	3	1	1	1		0	0.0196831	0.0222965	0	0	0	0	0	0	0.0314447	0.0128692	0.016518	0.00785608	0.0118652	0.00561136
	Otu00086	Firmicutes(100)	Negativicutes(100)	Selenomonadales(100)	Veillonellaceae(100)	Veillonella(100)		0	0	0	2	0	1	2	2	6	1	1	3	0	0	0		0	0	0	0.0415282	0	0.0121007	0.0101755	0.0339847	0.0412371	0.00285861	0.00643459	0.016518	0	0	0
	Otu00041	Firmicutes(100)	Negativicutes(100)	Selenomonadales(100)	Acidaminococcaceae(100)	Acidaminococcus(100)		0	0	0	0	0	0	0	0	0	0	17	0	0	0	0		0	0	0	0	0	0	0	0	0	0	0.109388	0	0	0	0
	Otu00058	Actinobacteria(100)	Actinobacteria(100)	Coriobacteriales(100)	Coriobacteriaceae(100)	unclassified(100)		0	0	0	0	0	0	0	0	0	10	2	4	0	0	0		0	0	0	0	0	0	0	0	0	0.0285861	0.0128692	0.022024	0	0	0
	Otu00082	Actinobacteria(100)	Actinobacteria(100)	Coriobacteriales(100)	Coriobacteriaceae(100)	Olsenella(100)		0	0	0	3	1	1	1	3	5	2	0	0	0	0	0		0	0	0	0.0622924	0.0117647	0.0121007	0.00508776	0.0509771	0.0343643	0.00571723	0	0	0	0	0
	Otu00102	Bacteroidetes(100)	Bacteroidia(100)	Bacteroidales(100)	Porphyromonadaceae(100)	Parabacteroides(100)		0	0	0	0	0	0	0	0	0	5	1	10	0	0	0		0	0	0	0	0	0	0	0	0	0.0142931	0.00643459	0.05506	0	0	0
	Otu00094	Firmicutes(100)	Clostridia(100)	Clostridiales(100)	Peptostreptococcaceae(100)	Clostridium_XI(100)		0	0	0	0	0	0	0	0	0	1	0	0	6	3	6		0	0	0	0	0	0	0	0	0	0.00285861	0	0	0.0471365	0.0355956	0.0336681
	Otu00070	Actinobacteria(100)	Actinobacteria(100)	Coriobacteriales(100)	Coriobacteriaceae(100)	Eggerthella(100)		0	0	0	0	0	0	4	4	4	1	2	0	0	0	0		0	0	0	0	0	0	0.0203511	0.0679694	0.0274914	0.00285861	0.0128692	0	0	0	0
	Otu00101	Firmicutes(100)	Negativicutes(100)	Selenomonadales(100)	Veillonellaceae(100)	Veillonella(100)		0	0	0	0	2	2	1	1	1	3	2	2	0	0	0		0	0	0	0	0.0235294	0.0242014	0.00508776	0.0169924	0.00687285	0.00857584	0.0128692	0.011012	0	0	0
	Otu00093	Proteobacteria(100)	Gammaproteobacteria(100)	Enterobacteriales(100)	Enterobacteriaceae(100)	unclassified(100)		0	0	4	1	3	1	2	3	0	1	0	2	0	0	0		0	0	0.0891862	0.0207641	0.0352941	0.0121007	0.0101755	0.0509771	0	0.00285861	0	0.011012	0	0	0
	Otu00075	Proteobacteria(100)	Gammaproteobacteria(100)	Enterobacteriales(100)	Enterobacteriaceae(100)	Escherichia/Shigella(100)		0	0	0	0	0	2	0	0	0	3	0	7	0	0	0		0	0	0	0	0	0.0242014	0	0	0	0.00857584	0	0.038542	0	0	0
	Otu00063	Firmicutes(100)	Erysipelotrichia(100)	Erysipelotrichales(100)	Erysipelotrichaceae(100)	Clostridium_XVIII(100)		0	0	0	0	0	0	0	0	0	9	2	0	0	0	0		0	0	0	0	0	0	0	0	0	0.0257275	0.0128692	0	0	0	0
	Otu00097	Proteobacteria(100)	Gammaproteobacteria(100)	Enterobacteriales(100)	Enterobacteriaceae(100)	unclassified(100)		0	0	1	0	0	0	0	2	1	3	3	1	0	0	0		0	0	0.0222965	0	0	0	0	0.0339847	0.00687285	0.00857584	0.0193038	0.005506	0	0	0
	Otu00162	Firmicutes(100)	unclassified(100)	unclassified(100)	unclassified(100)	unclassified(100)		0	0	0	5	4	0	0	0	0	0	0	0	0	0	0		0	0	0	0.103821	0.0470588	0	0	0	0	0	0	0	0	0	0
	Otu00080	Proteobacteria(100)	Gammaproteobacteria(100)	Enterobacteriales(100)	Enterobacteriaceae(100)	Escherichia/Shigella(97)		0	1	0	1	0	0	0	0	2	0	1	0	0	3	1		0	0.00984155	0	0.0207641	0	0	0	0	0.0137457	0	0.00643459	0	0	0.0355956	0.00561136
	Otu00133	Firmicutes(100)	Negativicutes(100)	Selenomonadales(100)	Veillonellaceae(100)	Veillonella(100)		0	0	0	2	0	1	0	0	2	1	0	2	0	0	0		0	0	0	0.0415282	0	0.0121007	0	0	0.0137457	0.00285861	0	0.011012	0	0	0
	Otu00135	Bacteroidetes(100)	Bacteroidia(100)	Bacteroidales(100)	unclassified(62)	unclassified(62)		0	0	0	0	0	0	0	0	0	3	0	5	0	0	0		0	0	0	0	0	0	0	0	0	0.00857584	0	0.02753	0	0	0
	Otu00143	Bacteroidetes(100)	Bacteroidia(100)	Bacteroidales(100)	Bacteroidaceae(100)	Bacteroides(100)		0	0	0	0	0	0	0	0	0	3	0	5	0	0	0		0	0	0	0	0	0	0	0	0	0.00857584	0	0.02753	0	0	0
	Otu00182	Proteobacteria(100)	Gammaproteobacteria(100)	Enterobacteriales(100)	Enterobacteriaceae(100)	Morganella(100)		0	0	0	0	0	0	0	0	0	3	1	4	0	0	0		0	0	0	0	0	0	0	0	0	0.00857584	0.00643459	0.022024	0	0	0
	Otu00077	Actinobacteria(100)	Actinobacteria(100)	Actinomycetales(100)	Microbacteriaceae(100)	unclassified(76)		0	1	0	0	0	0	0	0	0	1	0	1	1	0	3		0	0.00984155	0	0	0	0	0	0	0	0.00285861	0	0.005506	0.00785608	0	0.0168341
	Otu00053	Proteobacteria(100)	Gammaproteobacteria(100)	Pseudomonadales(100)	Pseudomonadaceae(100)	Pseudomonas(100)		0	0	0	0	0	0	0	0	0	2	2	2	0	0	0		0	0	0	0	0	0	0	0	0	0.00571723	0.0128692	0.011012	0	0	0
	Otu00131	Firmicutes(100)	Clostridia(100)	Clostridiales(100)	Clostridiaceae_1(100)	unclassified(62)		0	0	0	0	1	0	4	0	1	0	0	0	0	0	0		0	0	0	0	0.0117647	0	0.0203511	0	0.00687285	0	0	0	0	0	0
	Otu00145	Bacteroidetes(100)	Bacteroidia(100)	Bacteroidales(100)	Bacteroidaceae(100)	Bacteroides(100)		0	0	0	0	0	0	0	0	0	4	1	1	0	0	0		0	0	0	0	0	0	0	0	0	0.0114345	0.00643459	0.005506	0	0	0
	Otu00174	Firmicutes(100)	Negativicutes(100)	Selenomonadales(100)	Veillonellaceae(100)	Veillonella(100)		0	0	0	0	0	0	1	0	0	2	0	3	0	0	0		0	0	0	0	0	0	0.00508776	0	0	0.00571723	0	0.016518	0	0	0
	Otu00206	Bacteroidetes(100)	Bacteroidia(100)	Bacteroidales(100)	Bacteroidaceae(100)	Bacteroides(100)		0	0	0	0	0	0	0	0	0	1	0	5	0	0	0		0	0	0	0	0	0	0	0	0	0.00285861	0	0.02753	0	0	0
	Otu00210	Bacteroidetes(100)	Bacteroidia(100)	Bacteroidales(100)	unclassified(100)	unclassified(100)		0	0	0	0	0	0	0	0	0	5	0	1	0	0	0		0	0	0	0	0	0	0	0	0	0.0142931	0	0.005506	0	0	0
	Otu00225	Firmicutes(100)	unclassified(100)	unclassified(100)	unclassified(100)	unclassified(100)		0	0	0	0	0	2	4	0	0	0	0	0	0	0	0		0	0	0	0	0	0.0242014	0.0203511	0	0	0	0	0	0	0	0
	Otu00036	Firmicutes(100)	Bacilli(100)	Lactobacillales(100)	Lactobacillaceae(100)	Lactobacillus(100)		0	0	0	0	0	0	0	0	0	0	0	0	1	2	3		0	0	0	0	0	0	0	0	0	0	0	0	0.00785608	0.0237304	0.0168341
	Otu00132	Firmicutes(100)	Bacilli(100)	Lactobacillales(100)	Lactobacillaceae(100)	Lactobacillus(100)		0	0	0	0	0	0	0	0	0	0	0	0	4	0	2		0	0	0	0	0	0	0	0	0	0	0	0	0.0314243	0	0.0112227
	Otu00227	Firmicutes(100)	unclassified(100)	unclassified(100)	unclassified(100)	unclassified(100)		0	0	0	0	0	0	0	0	0	0	0	0	2	0	4		0	0	0	0	0	0	0	0	0	0	0	0	0.0157122	0	0.0224454
	Otu00185	Proteobacteria(100)	Gammaproteobacteria(100)	Pasteurellales(100)	Pasteurellaceae(100)	unclassified(100)		0	1	0	4	0	0	0	0	0	1	0	0	0	0	0		0	0.00984155	0	0.0830565	0	0	0	0	0	0.00285861	0	0	0	0	0
	Otu00175	Firmicutes(100)	Bacilli(100)	Lactobacillales(100)	Streptococcaceae(100)	Lactococcus(100)		0	0	0	0	2	2	0	0	1	0	0	0	0	0	0		0	0	0	0	0.0235294	0.0242014	0	0	0.00687285	0	0	0	0	0	0
	Otu00176	Firmicutes(100)	Clostridia(100)	Clostridiales(100)	Clostridiaceae_1(100)	Clostridium_sensu_stricto(75)		0	0	0	1	1	0	3	0	0	0	0	0	0	0	0		0	0	0	0.0207641	0.0117647	0	0.0152633	0	0	0	0	0	0	0	0
	Otu00192	Bacteroidetes(100)	Bacteroidia(100)	Bacteroidales(100)	Bacteroidaceae(100)	Bacteroides(100)		0	0	0	0	0	0	0	0	0	3	0	2	0	0	0		0	0	0	0	0	0	0	0	0	0.00857584	0	0.011012	0	0	0
	Otu00232	Proteobacteria(100)	Gammaproteobacteria(100)	Enterobacteriales(100)	Enterobacteriaceae(100)	unclassified(100)		0	0	0	0	0	1	0	0	0	0	4	0	0	0	0		0	0	0	0	0	0.0121007	0	0	0	0	0.0257384	0	0	0	0
	Otu00240	Firmicutes(100)	Negativicutes(100)	Selenomonadales(100)	Veillonellaceae(100)	Veillonella(100)		0	0	0	0	0	0	1	0	0	1	0	3	0	0	0		0	0	0	0	0	0	0.00508776	0	0	0.00285861	0	0.016518	0	0	0
	Otu00255	Firmicutes(100)	Clostridia(100)	Clostridiales(100)	Lachnospiraceae(100)	unclassified(100)		0	0	0	0	0	0	0	0	0	1	3	1	0	0	0		0	0	0	0	0	0	0	0	0	0.00285861	0.0193038	0.005506	0	0	0
	Otu00188	Firmicutes(100)	Clostridia(100)	Clostridiales(100)	Clostridiaceae_1(100)	unclassified(72)		0	0	0	0	0	0	2	0	0	1	0	1	1	0	0		0	0	0	0	0	0	0.0101755	0	0	0.00285861	0	0.005506	0.00785608	0	0
	Otu00035	Firmicutes(100)	Clostridia(100)	Clostridiales(100)	Clostridiaceae_1(100)	Clostridium_sensu_stricto(98)		0	0	0	0	0	0	0	0	0	3	0	0	2	0	0		0	0	0	0	0	0	0	0	0	0.00857584	0	0	0.0157122	0	0
	Otu00179	Firmicutes(100)	Erysipelotrichia(100)	Erysipelotrichales(100)	Erysipelotrichaceae(100)	Turicibacter(100)		0	0	0	1	0	0	0	0	0	0	0	0	2	1	1		0	0	0	0.0207641	0	0	0	0	0	0	0	0	0.0157122	0.0118652	0.00561136
	Otu00147	Proteobacteria(100)	Gammaproteobacteria(100)	Enterobacteriales(100)	Enterobacteriaceae(100)	unclassified(100)		0	0	6	0	0	0	0	0	1	0	3	0	0	0	0		0	0	0.133779	0	0	0	0	0	0.00687285	0	0.0193038	0	0	0	0
	Otu00096	Bacteroidetes(100)	Sphingobacteriia(100)	Sphingobacteriales(100)	Sphingobacteriaceae(100)	Sphingobacterium(100)		0	1	0	0	0	0	0	0	0	1	0	1	0	1	1		0	0.00984155	0	0	0	0	0	0	0	0.00285861	0	0.005506	0	0.0118652	0.00561136
	Otu00117	Firmicutes(100)	Negativicutes(100)	Selenomonadales(100)	Veillonellaceae(100)	Veillonella(100)		0	0	0	0	0	0	0	0	0	3	0	1	0	0	0		0	0	0	0	0	0	0	0	0	0.00857584	0	0.005506	0	0	0
	Otu00139	Bacteroidetes(100)	Bacteroidia(100)	Bacteroidales(100)	Porphyromonadaceae(100)	Dysgonomonas(100)		0	0	0	0	0	0	0	1	3	0	0	0	0	0	0		0	0	0	0	0	0	0	0.0169924	0.0206186	0	0	0	0	0	0
	Otu00154	Firmicutes(100)	Clostridia(100)	Clostridiales(100)	Lachnospiraceae(100)	unclassified(80)		0	0	0	0	0	0	0	0	0	1	2	1	0	0	0		0	0	0	0	0	0	0	0	0	0.00285861	0.0128692	0.005506	0	0	0
	Otu00156	Bacteroidetes(100)	Bacteroidia(100)	Bacteroidales(100)	Bacteroidaceae(100)	Bacteroides(100)		0	0	0	0	0	0	0	0	0	1	0	3	0	0	0		0	0	0	0	0	0	0	0	0	0.00285861	0	0.016518	0	0	0
	Otu00167	Bacteroidetes(100)	Bacteroidia(100)	Bacteroidales(100)	Bacteroidaceae(100)	Bacteroides(100)		0	0	0	0	0	0	0	0	0	1	0	3	0	0	0		0	0	0	0	0	0	0	0	0	0.00285861	0	0.016518	0	0	0
	Otu00181	Firmicutes(100)	Negativicutes(100)	Selenomonadales(100)	Veillonellaceae(100)	Veillonella(100)		0	0	0	0	2	0	0	0	0	1	0	1	0	0	0		0	0	0	0	0.0235294	0	0	0	0	0.00285861	0	0.005506	0	0	0
	Otu00205	Proteobacteria(100)	Gammaproteobacteria(100)	Enterobacteriales(100)	Enterobacteriaceae(100)	unclassified(100)		0	0	0	0	0	0	0	0	0	0	2	2	0	0	0		0	0	0	0	0	0	0	0	0	0	0.0128692	0.011012	0	0	0
	Otu00211	Bacteroidetes(100)	Bacteroidia(100)	Bacteroidales(100)	unclassified(100)	unclassified(100)		0	0	0	0	0	0	0	0	0	1	0	3	0	0	0		0	0	0	0	0	0	0	0	0	0.00285861	0	0.016518	0	0	0
	Otu00260	Bacteroidetes(100)	Bacteroidia(100)	Bacteroidales(100)	Bacteroidaceae(80)	Bacteroides(80)		0	0	0	0	0	0	0	0	0	0	0	4	0	0	0		0	0	0	0	0	0	0	0	0	0	0	0.022024	0	0	0
	Otu00278	Firmicutes(100)	Negativicutes(100)	Selenomonadales(100)	Veillonellaceae(100)	unclassified(100)		0	0	0	0	0	1	1	0	2	0	0	0	0	0	0		0	0	0	0	0	0.0121007	0.00508776	0	0.0137457	0	0	0	0	0	0
	Otu00285	Firmicutes(100)	unclassified(100)	unclassified(100)	unclassified(100)	unclassified(100)		0	0	0	0	0	4	0	0	0	0	0	0	0	0	0		0	0	0	0	0	0.0484027	0	0	0	0	0	0	0	0	0
	Otu00302	Bacteroidetes(100)	Bacteroidia(100)	Bacteroidales(100)	Bacteroidaceae(100)	Bacteroides(100)		0	0	0	0	0	0	0	0	0	0	1	3	0	0	0		0	0	0	0	0	0	0	0	0	0	0.00643459	0.016518	0	0	0
	Otu00306	Firmicutes(100)	Clostridia(100)	Clostridiales(100)	Lachnospiraceae(100)	unclassified(100)		0	0	0	0	0	0	0	0	0	0	2	2	0	0	0		0	0	0	0	0	0	0	0	0	0	0.0128692	0.011012	0	0	0
	Otu00307	Proteobacteria(100)	Deltaproteobacteria(100)	Desulfovibrionales(100)	Desulfovibrionaceae(100)	unclassified(100)		0	0	0	0	0	0	0	1	1	1	0	1	0	0	0		0	0	0	0	0	0	0	0.0169924	0.00687285	0.00285861	0	0.005506	0	0	0
	Otu00118	Firmicutes(100)	Negativicutes(100)	Selenomonadales(100)	Veillonellaceae(100)	Megamonas(100)		0	0	0	0	0	0	0	0	0	0	0	0	2	0	2		0	0	0	0	0	0	0	0	0	0	0	0	0.0157122	0	0.0112227
	Otu00280	Firmicutes(100)	Bacilli(100)	Lactobacillales(100)	unclassified(75)	unclassified(75)		0	0	0	0	0	0	0	0	0	0	0	0	2	1	1		0	0	0	0	0	0	0	0	0	0	0	0	0.0157122	0.0118652	0.00561136
	Otu00288	Firmicutes(100)	unclassified(100)	unclassified(100)	unclassified(100)	unclassified(100)		0	0	0	0	0	0	0	0	0	0	0	0	3	1	0		0	0	0	0	0	0	0	0	0	0	0	0	0.0235682	0.0118652	0
	Otu00137	Firmicutes(100)	Bacilli(100)	Lactobacillales(100)	Lactobacillaceae(100)	Lactobacillus(100)		0	0	0	0	0	0	0	0	0	0	3	0	0	0	0		0	0	0	0	0	0	0	0	0	0	0.0193038	0	0	0	0
	Otu00190	Firmicutes(100)	Clostridia(100)	Clostridiales(100)	Clostridiaceae_1(100)	Clostridium_sensu_stricto(86)		0	0	0	0	0	0	2	0	0	0	1	0	0	0	0		0	0	0	0	0	0	0.0101755	0	0	0	0.00643459	0	0	0	0
	Otu00215	Firmicutes(100)	Negativicutes(100)	Selenomonadales(100)	Veillonellaceae(100)	Veillonella(100)		0	0	0	0	0	0	2	0	0	0	1	0	0	0	0		0	0	0	0	0	0	0.0101755	0	0	0	0.00643459	0	0	0	0
	Otu00237	Bacteroidetes(100)	Bacteroidia(100)	Bacteroidales(100)	Porphyromonadaceae(80)	Parabacteroides(80)		0	0	0	0	0	0	0	0	0	1	0	2	0	0	0		0	0	0	0	0	0	0	0	0	0.00285861	0	0.011012	0	0	0
	Otu00275	Bacteroidetes(100)	Bacteroidia(100)	Bacteroidales(100)	Bacteroidaceae(100)	Bacteroides(100)		0	0	0	0	0	0	0	0	0	0	1	2	0	0	0		0	0	0	0	0	0	0	0	0	0	0.00643459	0.011012	0	0	0
	Otu00276	Bacteroidetes(100)	Bacteroidia(100)	Bacteroidales(100)	Bacteroidaceae(100)	Bacteroides(100)		0	0	0	0	0	0	0	0	0	1	0	2	0	0	0		0	0	0	0	0	0	0	0	0	0.00285861	0	0.011012	0	0	0
	Otu00277	Bacteroidetes(100)	Bacteroidia(100)	Bacteroidales(100)	Bacteroidaceae(100)	Bacteroides(100)		0	0	0	0	0	0	0	0	0	0	0	3	0	0	0		0	0	0	0	0	0	0	0	0	0	0	0.016518	0	0	0
	Otu00293	Firmicutes(100)	Bacilli(100)	unclassified(100)	unclassified(100)	unclassified(100)		0	0	0	0	0	0	3	0	0	0	0	0	0	0	0		0	0	0	0	0	0	0.0152633	0	0	0	0	0	0	0	0
	Otu00304	Bacteroidetes(100)	Bacteroidia(100)	Bacteroidales(100)	Bacteroidaceae(100)	Bacteroides(100)		0	0	0	0	0	0	0	0	0	1	0	2	0	0	0		0	0	0	0	0	0	0	0	0	0.00285861	0	0.011012	0	0	0
	Otu00315	Firmicutes(100)	Negativicutes(100)	Selenomonadales(100)	Veillonellaceae(100)	Veillonella(100)		0	0	0	0	0	0	0	0	1	1	0	1	0	0	0		0	0	0	0	0	0	0	0	0.00687285	0.00285861	0	0.005506	0	0	0
	Otu00316	Firmicutes(100)	Negativicutes(100)	Selenomonadales(100)	Veillonellaceae(100)	unclassified(100)		0	0	0	0	0	0	0	0	0	0	1	2	0	0	0		0	0	0	0	0	0	0	0	0	0	0.00643459	0.011012	0	0	0
	Otu00322	unclassified(100)	unclassified(100)	unclassified(100)	unclassified(100)	unclassified(100)		0	0	0	0	1	0	0	0	0	0	0	2	0	0	0		0	0	0	0	0.0117647	0	0	0	0	0	0	0.011012	0	0	0
	Otu00372	Proteobacteria(100)	Gammaproteobacteria(100)	Enterobacteriales(100)	Enterobacteriaceae(100)	unclassified(100)		0	0	0	0	0	0	3	0	0	0	0	0	0	0	0		0	0	0	0	0	0	0.0152633	0	0	0	0	0	0	0	0
	Otu00379	Bacteroidetes(100)	Bacteroidia(100)	Bacteroidales(100)	Bacteroidaceae(67)	Bacteroides(67)		0	0	0	0	0	0	0	0	0	3	0	0	0	0	0		0	0	0	0	0	0	0	0	0	0.00857584	0	0	0	0	0
	Otu00389	Proteobacteria(100)	Gammaproteobacteria(100)	Enterobacteriales(100)	Enterobacteriaceae(100)	Escherichia/Shigella(100)		0	0	0	0	0	0	0	0	0	1	0	2	0	0	0		0	0	0	0	0	0	0	0	0	0.00285861	0	0.011012	0	0	0
	Otu00347	Firmicutes(100)	Bacilli(100)	Lactobacillales(100)	Streptococcaceae(100)	Streptococcus(100)		0	0	0	2	0	0	0	0	0	0	0	0	0	1	0		0	0	0	0.0415282	0	0	0	0	0	0	0	0	0	0.0118652	0
	Otu00059	unclassified(100)	unclassified(100)	unclassified(100)	unclassified(100)	unclassified(100)		0	0	0	0	0	0	0	0	0	0	0	0	1	1	1		0	0	0	0	0	0	0	0	0	0	0	0	0.00785608	0.0118652	0.00561136
	Otu00168	Proteobacteria(100)	Betaproteobacteria(100)	Burkholderiales(100)	Comamonadaceae(100)	Pelomonas(89)		0	0	0	0	0	0	0	0	0	0	0	0	1	0	2		0	0	0	0	0	0	0	0	0	0	0	0	0.00785608	0	0.0112227
	Otu00375	Firmicutes(100)	unclassified(100)	unclassified(100)	unclassified(100)	unclassified(100)		0	0	0	0	0	0	0	0	0	0	0	0	3	0	0		0	0	0	0	0	0	0	0	0	0	0	0	0.0235682	0	0
	Otu00187	Proteobacteria(100)	Gammaproteobacteria(100)	Enterobacteriales(100)	Enterobacteriaceae(100)	unclassified(100)		0	0	5	0	0	0	0	0	0	1	0	1	0	0	0		0	0	0.111483	0	0	0	0	0	0	0.00285861	0	0.005506	0	0	0
	Otu00342	Firmicutes(100)	Bacilli(100)	Lactobacillales(100)	Streptococcaceae(100)	Streptococcus(100)		0	1	0	1	0	0	0	0	1	0	0	0	0	0	0		0	0.00984155	0	0.0207641	0	0	0	0	0.00687285	0	0	0	0	0	0
	Otu00129	Firmicutes(100)	Negativicutes(100)	Selenomonadales(100)	Veillonellaceae(100)	Veillonella(100)		0	0	0	0	0	0	0	0	0	0	1	1	0	0	0		0	0	0	0	0	0	0	0	0	0	0.00643459	0.005506	0	0	0
	Otu00146	Proteobacteria(100)	Gammaproteobacteria(100)	Enterobacteriales(100)	Enterobacteriaceae(100)	Escherichia/Shigella(100)		0	0	0	0	0	0	0	0	2	0	0	0	0	0	0		0	0	0	0	0	0	0	0	0.0137457	0	0	0	0	0	0
	Otu00166	Firmicutes(100)	Negativicutes(100)	Selenomonadales(100)	Veillonellaceae(100)	Veillonella(100)		0	0	0	0	0	0	0	0	0	1	0	1	0	0	0		0	0	0	0	0	0	0	0	0	0.00285861	0	0.005506	0	0	0
	Otu00208	Bacteroidetes(100)	Bacteroidia(100)	Bacteroidales(100)	Porphyromonadaceae(100)	Parabacteroides(100)		0	0	0	0	0	0	0	0	0	2	0	0	0	0	0		0	0	0	0	0	0	0	0	0	0.00571723	0	0	0	0	0
	Otu00238	Firmicutes(100)	Clostridia(100)	Clostridiales(100)	Clostridiaceae_1(100)	unclassified(100)		0	0	0	0	0	0	2	0	0	0	0	0	0	0	0		0	0	0	0	0	0	0.0101755	0	0	0	0	0	0	0	0
	Otu00239	Firmicutes(100)	Bacilli(100)	Lactobacillales(100)	Streptococcaceae(100)	Streptococcus(100)		0	0	0	0	0	1	0	0	0	1	0	0	0	0	0		0	0	0	0	0	0.0121007	0	0	0	0.00285861	0	0	0	0	0
	Otu00244	Actinobacteria(100)	Actinobacteria(100)	Coriobacteriales(100)	Coriobacteriaceae(100)	unclassified(100)		0	0	0	0	0	0	0	0	0	1	0	1	0	0	0		0	0	0	0	0	0	0	0	0	0.00285861	0	0.005506	0	0	0
	Otu00272	Firmicutes(100)	Bacilli(100)	Lactobacillales(100)	Enterococcaceae(100)	Enterococcus(75)		0	0	0	0	0	0	0	0	0	1	0	1	0	0	0		0	0	0	0	0	0	0	0	0	0.00285861	0	0.005506	0	0	0
	Otu00298	Bacteroidetes(100)	Bacteroidia(100)	Bacteroidales(100)	Bacteroidaceae(100)	Bacteroides(100)		0	0	0	0	0	0	0	0	0	1	0	1	0	0	0		0	0	0	0	0	0	0	0	0	0.00285861	0	0.005506	0	0	0
	Otu00308	Proteobacteria(100)	Gammaproteobacteria(100)	Enterobacteriales(100)	Enterobacteriaceae(100)	unclassified(100)		0	0	0	0	0	0	0	0	0	1	0	1	0	0	0		0	0	0	0	0	0	0	0	0	0.00285861	0	0.005506	0	0	0
	Otu00312	Firmicutes(100)	Negativicutes(100)	Selenomonadales(100)	Veillonellaceae(100)	Veillonella(75)		0	0	0	0	0	0	0	0	0	1	0	1	0	0	0		0	0	0	0	0	0	0	0	0	0.00285861	0	0.005506	0	0	0
	Otu00328	Firmicutes(100)	Negativicutes(100)	Selenomonadales(100)	Acidaminococcaceae(100)	Acidaminococcus(100)		0	0	0	0	0	0	0	0	0	0	2	0	0	0	0		0	0	0	0	0	0	0	0	0	0	0.0128692	0	0	0	0
	Otu00329	unclassified(100)	unclassified(100)	unclassified(100)	unclassified(100)	unclassified(100)		0	0	0	0	0	0	0	0	0	0	1	1	0	0	0		0	0	0	0	0	0	0	0	0	0	0.00643459	0.005506	0	0	0
	Otu00330	Proteobacteria(100)	Gammaproteobacteria(100)	Pasteurellales(100)	Pasteurellaceae(100)	unclassified(100)		0	0	0	0	0	0	0	1	1	0	0	0	0	0	0		0	0	0	0	0	0	0	0.0169924	0.00687285	0	0	0	0	0	0
	Otu00332	Proteobacteria(100)	Gammaproteobacteria(100)	unclassified(100)	unclassified(100)	unclassified(100)		0	0	0	0	0	0	0	0	0	0	1	1	0	0	0		0	0	0	0	0	0	0	0	0	0	0.00643459	0.005506	0	0	0
	Otu00344	Firmicutes(100)	Bacilli(100)	Lactobacillales(100)	Streptococcaceae(100)	Streptococcus(100)		0	0	0	0	0	0	0	0	0	0	0	2	0	0	0		0	0	0	0	0	0	0	0	0	0	0	0.011012	0	0	0
	Otu00349	Firmicutes(100)	Bacilli(100)	Lactobacillales(100)	Enterococcaceae(100)	Enterococcus(100)		0	0	0	0	1	0	0	0	0	1	0	0	0	0	0		0	0	0	0	0.0117647	0	0	0	0	0.00285861	0	0	0	0	0
	Otu00364	Firmicutes(100)	Negativicutes(100)	Selenomonadales(100)	Veillonellaceae(100)	Veillonella(100)		0	0	0	0	0	1	0	0	0	0	0	1	0	0	0		0	0	0	0	0	0.0121007	0	0	0	0	0	0.005506	0	0	0
	Otu00405	Bacteroidetes(100)	Bacteroidia(100)	Bacteroidales(100)	Porphyromonadaceae(100)	Parabacteroides(100)		0	0	0	0	0	0	0	0	0	2	0	0	0	0	0		0	0	0	0	0	0	0	0	0	0.00571723	0	0	0	0	0
	Otu00408	Firmicutes(100)	Negativicutes(100)	Selenomonadales(100)	Veillonellaceae(100)	Veillonella(100)		0	0	0	0	0	0	1	0	0	0	0	1	0	0	0		0	0	0	0	0	0	0.00508776	0	0	0	0	0.005506	0	0	0
	Otu00440	Proteobacteria(100)	Gammaproteobacteria(100)	Pasteurellales(100)	Pasteurellaceae(100)	unclassified(100)		0	0	0	0	0	0	0	0	2	0	0	0	0	0	0		0	0	0	0	0	0	0	0	0.0137457	0	0	0	0	0	0
	Otu00465	Firmicutes(100)	Negativicutes(100)	Selenomonadales(100)	Veillonellaceae(100)	Veillonella(100)		0	0	0	0	1	0	1	0	0	0	0	0	0	0	0		0	0	0	0	0.0117647	0	0.00508776	0	0	0	0	0	0	0	0
	Otu00476	Firmicutes(100)	Negativicutes(100)	Selenomonadales(100)	Veillonellaceae(100)	Veillonella(100)		0	0	0	0	0	0	1	0	1	0	0	0	0	0	0		0	0	0	0	0	0	0.00508776	0	0.00687285	0	0	0	0	0	0
	Otu00480	Bacteroidetes(100)	Bacteroidia(100)	Bacteroidales(100)	unclassified(100)	unclassified(100)		0	0	0	0	0	0	2	0	0	0	0	0	0	0	0		0	0	0	0	0	0	0.0101755	0	0	0	0	0	0	0	0
	Otu00505	Bacteroidetes(100)	Bacteroidia(100)	Bacteroidales(100)	Bacteroidaceae(100)	Bacteroides(100)		0	0	0	0	0	0	0	0	0	0	0	2	0	0	0		0	0	0	0	0	0	0	0	0	0	0	0.011012	0	0	0
	Otu00509	Firmicutes(100)	Clostridia(100)	Clostridiales(100)	Clostridiaceae_1(100)	unclassified(100)		0	0	0	0	0	0	1	0	1	0	0	0	0	0	0		0	0	0	0	0	0	0.00508776	0	0.00687285	0	0	0	0	0	0
	Otu00512	Firmicutes(100)	Bacilli(100)	Lactobacillales(100)	Lactobacillaceae(100)	Lactobacillus(100)		0	0	0	2	0	0	0	0	0	0	0	0	0	0	0		0	0	0	0.0415282	0	0	0	0	0	0	0	0	0	0	0
	Otu00517	Bacteroidetes(100)	Bacteroidia(100)	Bacteroidales(100)	Bacteroidaceae(100)	Bacteroides(100)		0	0	0	0	0	0	0	0	0	0	0	2	0	0	0		0	0	0	0	0	0	0	0	0	0	0	0.011012	0	0	0
	Otu00530	Proteobacteria(100)	Gammaproteobacteria(100)	Enterobacteriales(100)	Enterobacteriaceae(100)	unclassified(100)		0	0	0	0	0	0	0	0	0	2	0	0	0	0	0		0	0	0	0	0	0	0	0	0	0.00571723	0	0	0	0	0
	Otu00543	Proteobacteria(100)	Gammaproteobacteria(100)	Enterobacteriales(100)	Enterobacteriaceae(100)	Escherichia/Shigella(100)		0	0	0	1	0	0	0	0	0	0	0	1	0	0	0		0	0	0	0.0207641	0	0	0	0	0	0	0	0.005506	0	0	0
	Otu00547	Proteobacteria(100)	Gammaproteobacteria(100)	Enterobacteriales(100)	Enterobacteriaceae(100)	unclassified(100)		0	0	0	0	1	0	0	0	1	0	0	0	0	0	0		0	0	0	0	0.0117647	0	0	0	0.00687285	0	0	0	0	0	0
	Otu00548	Proteobacteria(100)	Gammaproteobacteria(100)	Enterobacteriales(100)	Enterobacteriaceae(100)	unclassified(100)		0	0	0	0	0	0	0	0	0	0	2	0	0	0	0		0	0	0	0	0	0	0	0	0	0	0.0128692	0	0	0	0
	Otu00550	Bacteroidetes(100)	Bacteroidia(100)	Bacteroidales(100)	Porphyromonadaceae(100)	Parabacteroides(100)		0	0	0	0	0	0	0	0	0	0	0	2	0	0	0		0	0	0	0	0	0	0	0	0	0	0	0.011012	0	0	0
	Otu00551	Bacteroidetes(100)	Bacteroidia(100)	Bacteroidales(100)	unclassified(100)	unclassified(100)		0	0	0	0	0	0	0	0	0	2	0	0	0	0	0		0	0	0	0	0	0	0	0	0	0.00571723	0	0	0	0	0
	Otu00553	Bacteroidetes(100)	Bacteroidia(100)	Bacteroidales(100)	unclassified(100)	unclassified(100)		0	0	0	0	0	0	0	0	0	1	0	1	0	0	0		0	0	0	0	0	0	0	0	0	0.00285861	0	0.005506	0	0	0
	Otu00554	Bacteroidetes(100)	Bacteroidia(100)	Bacteroidales(100)	Bacteroidaceae(100)	Bacteroides(100)		0	0	0	0	0	0	0	0	0	0	0	2	0	0	0		0	0	0	0	0	0	0	0	0	0	0	0.011012	0	0	0
	Otu00557	Bacteroidetes(100)	Bacteroidia(100)	Bacteroidales(100)	unclassified(100)	unclassified(100)		0	0	0	0	0	0	0	0	0	2	0	0	0	0	0		0	0	0	0	0	0	0	0	0	0.00571723	0	0	0	0	0
	Otu00558	Bacteroidetes(100)	Bacteroidia(100)	Bacteroidales(100)	unclassified(100)	unclassified(100)		0	0	0	0	0	0	0	0	1	1	0	0	0	0	0		0	0	0	0	0	0	0	0	0.00687285	0.00285861	0	0	0	0	0
	Otu00561	Bacteroidetes(100)	Bacteroidia(100)	Bacteroidales(100)	Bacteroidaceae(100)	Bacteroides(100)		0	0	0	0	0	0	0	2	0	0	0	0	0	0	0		0	0	0	0	0	0	0	0.0339847	0	0	0	0	0	0	0
	Otu00589	Firmicutes(100)	Erysipelotrichia(100)	Erysipelotrichales(100)	Erysipelotrichaceae(100)	Turicibacter(100)		0	0	0	0	0	2	0	0	0	0	0	0	0	0	0		0	0	0	0	0	0.0242014	0	0	0	0	0	0	0	0	0
	Otu00600	unclassified(100)	unclassified(100)	unclassified(100)	unclassified(100)	unclassified(100)		0	0	0	0	0	0	0	0	0	2	0	0	0	0	0		0	0	0	0	0	0	0	0	0	0.00571723	0	0	0	0	0
	Otu00601	unclassified(100)	unclassified(100)	unclassified(100)	unclassified(100)	unclassified(100)		0	0	0	0	0	0	0	0	0	0	0	2	0	0	0		0	0	0	0	0	0	0	0	0	0	0	0.011012	0	0	0
	Otu00641	Firmicutes(100)	Negativicutes(100)	Selenomonadales(100)	Veillonellaceae(100)	Veillonella(100)		0	0	0	0	2	0	0	0	0	0	0	0	0	0	0		0	0	0	0	0.0235294	0	0	0	0	0	0	0	0	0	0
	Otu00052	Proteobacteria(100)	Alphaproteobacteria(100)	Sphingomonadales(100)	Sphingomonadaceae(100)	Sphingomonas(99)		0	0	0	0	0	0	0	0	0	1	0	0	0	0	1		0	0	0	0	0	0	0	0	0	0.00285861	0	0	0	0	0.00561136
	Otu00099	Actinobacteria(100)	Actinobacteria(100)	Actinomycetales(100)	Brevibacteriaceae(100)	Brevibacterium(100)		0	0	0	0	0	0	0	0	0	0	1	0	1	0	0		0	0	0	0	0	0	0	0	0	0	0.00643459	0	0.00785608	0	0
	Otu00071	Proteobacteria(100)	Epsilonproteobacteria(100)	Campylobacterales(100)	Campylobacteraceae(100)	Campylobacter(100)		0	0	0	0	0	0	0	0	0	0	0	0	0	1	1		0	0	0	0	0	0	0	0	0	0	0	0	0	0.0118652	0.00561136
	Otu00121	Actinobacteria(100)	Actinobacteria(100)	Actinomycetales(100)	Dermabacteraceae(100)	Brachybacterium(100)		0	0	0	0	0	0	0	0	0	0	0	0	1	0	1		0	0	0	0	0	0	0	0	0	0	0	0	0.00785608	0	0.00561136
	Otu00134	Actinobacteria(100)	Actinobacteria(100)	Actinomycetales(100)	Propionibacteriaceae(100)	unclassified(100)		0	0	0	0	0	0	0	0	0	0	0	0	1	0	1		0	0	0	0	0	0	0	0	0	0	0	0	0.00785608	0	0.00561136
	Otu00184	Firmicutes(100)	Clostridia(100)	Clostridiales(100)	Clostridiaceae_1(100)	Clostridium_sensu_stricto(100)		0	0	0	0	0	0	0	0	0	0	0	0	1	0	1		0	0	0	0	0	0	0	0	0	0	0	0	0.00785608	0	0.00561136
	Otu00279	Firmicutes(100)	Bacilli(100)	Lactobacillales(100)	unclassified(75)	unclassified(75)		0	0	0	0	0	0	0	0	0	0	0	0	1	0	1		0	0	0	0	0	0	0	0	0	0	0	0	0.00785608	0	0.00561136
	Otu00346	Firmicutes(100)	Bacilli(100)	Lactobacillales(100)	Lactobacillaceae(100)	Lactobacillus(100)		0	0	0	0	0	0	0	0	0	0	0	0	2	0	0		0	0	0	0	0	0	0	0	0	0	0	0	0.0157122	0	0
	Otu00374	Actinobacteria(100)	Actinobacteria(100)	Actinomycetales(100)	Propionibacteriaceae(100)	unclassified(100)		0	0	0	0	0	0	0	0	0	0	0	0	0	1	1		0	0	0	0	0	0	0	0	0	0	0	0	0	0.0118652	0.00561136
	Otu00437	Firmicutes(100)	Bacilli(100)	Lactobacillales(100)	Leuconostocaceae(100)	unclassified(100)		0	0	0	0	0	0	0	0	0	0	0	0	0	0	2		0	0	0	0	0	0	0	0	0	0	0	0	0	0	0.0112227
	Otu00486	Firmicutes(100)	Bacilli(100)	Lactobacillales(100)	Lactobacillaceae(100)	Lactobacillus(100)		0	0	0	0	0	0	0	0	0	0	0	0	1	0	1		0	0	0	0	0	0	0	0	0	0	0	0	0.00785608	0	0.00561136
	Otu00500	Firmicutes(100)	unclassified(100)	unclassified(100)	unclassified(100)	unclassified(100)		0	0	0	0	0	0	0	0	0	0	0	0	2	0	0		0	0	0	0	0	0	0	0	0	0	0	0	0.0157122	0	0
	Otu00508	Firmicutes(100)	Clostridia(100)	Clostridiales(100)	Clostridiaceae_1(100)	unclassified(100)		0	0	0	0	0	0	0	0	0	0	0	0	0	1	1		0	0	0	0	0	0	0	0	0	0	0	0	0	0.0118652	0.00561136
	Otu00611	Firmicutes(100)	Bacilli(100)	Lactobacillales(100)	unclassified(100)	unclassified(100)		0	0	0	0	0	0	0	0	0	0	0	0	0	0	2		0	0	0	0	0	0	0	0	0	0	0	0	0	0	0.0112227
	Otu00032	Firmicutes(100)	Bacilli(100)	Lactobacillales(100)	Streptococcaceae(100)	Lactococcus(100)		0	1	0	0	0	0	1	0	0	0	0	0	0	0	0		0	0.00984155	0	0	0	0	0.00508776	0	0	0	0	0	0	0	0
	Otu00204	Proteobacteria(100)	Gammaproteobacteria(100)	Xanthomonadales(100)	Xanthomonadaceae(100)	Luteimonas(72)		0	1	0	0	0	0	0	0	0	0	0	1	0	0	0		0	0.00984155	0	0	0	0	0	0	0	0	0	0.005506	0	0	0
	Otu00111	Firmicutes(100)	Clostridia(100)	Clostridiales(100)	Clostridiaceae_1(100)	Clostridium_sensu_stricto(100)		0	0	0	0	0	0	0	0	0	0	0	1	0	0	0		0	0	0	0	0	0	0	0	0	0	0	0.005506	0	0	0
	Otu00112	Firmicutes(100)	Clostridia(100)	Clostridiales(100)	Clostridiaceae_1(100)	Clostridium_sensu_stricto(100)		0	0	0	0	1	0	0	0	0	0	0	0	0	0	0		0	0	0	0	0.0117647	0	0	0	0	0	0	0	0	0	0
	Otu00122	Firmicutes(100)	Negativicutes(100)	Selenomonadales(100)	Veillonellaceae(100)	Veillonella(94)		0	0	0	1	0	0	0	0	0	0	0	0	0	0	0		0	0	0	0.0207641	0	0	0	0	0	0	0	0	0	0	0
	Otu00130	Firmicutes(100)	Negativicutes(100)	Selenomonadales(100)	Acidaminococcaceae(100)	Acidaminococcus(100)		0	0	0	0	0	0	0	0	0	0	1	0	0	0	0		0	0	0	0	0	0	0	0	0	0	0.00643459	0	0	0	0
	Otu00141	Proteobacteria(100)	Alphaproteobacteria(100)	Sphingomonadales(100)	Sphingomonadaceae(100)	Novosphingobium(91)		0	0	0	0	0	0	0	0	0	0	0	1	0	0	0		0	0	0	0	0	0	0	0	0	0	0	0.005506	0	0	0
	Otu00155	Firmicutes(100)	Clostridia(100)	Clostridiales(100)	Clostridiaceae_1(100)	unclassified(80)		0	0	0	0	0	0	0	0	0	0	0	1	0	0	0		0	0	0	0	0	0	0	0	0	0	0	0.005506	0	0	0
	Otu00203	Proteobacteria(100)	Gammaproteobacteria(100)	Pseudomonadales(100)	Pseudomonadaceae(100)	Pseudomonas(100)		0	0	0	0	0	0	0	0	0	0	0	1	0	0	0		0	0	0	0	0	0	0	0	0	0	0	0.005506	0	0	0
	Otu00214	Firmicutes(100)	Clostridia(100)	Clostridiales(100)	Clostridiaceae_1(100)	unclassified(67)		0	0	0	0	0	1	0	0	0	0	0	0	0	0	0		0	0	0	0	0	0.0121007	0	0	0	0	0	0	0	0	0
	Otu00221	Firmicutes(100)	Bacilli(100)	Lactobacillales(100)	Streptococcaceae(100)	Streptococcus(100)		0	0	0	0	0	0	0	0	0	1	0	0	0	0	0		0	0	0	0	0	0	0	0	0	0.00285861	0	0	0	0	0
	Otu00234	Firmicutes(100)	Negativicutes(100)	Selenomonadales(100)	Veillonellaceae(100)	Veillonella(100)		0	0	0	0	0	0	0	0	0	1	0	0	0	0	0		0	0	0	0	0	0	0	0	0	0.00285861	0	0	0	0	0
	Otu00236	Bacteroidetes(100)	Sphingobacteriia(100)	Sphingobacteriales(100)	Sphingobacteriaceae(100)	Pedobacter(100)		0	0	0	0	0	0	0	0	0	1	0	0	0	0	0		0	0	0	0	0	0	0	0	0	0.00285861	0	0	0	0	0
	Otu00243	Firmicutes(100)	Negativicutes(100)	Selenomonadales(100)	Veillonellaceae(100)	Veillonella(100)		0	0	0	0	0	0	0	0	0	0	0	1	0	0	0		0	0	0	0	0	0	0	0	0	0	0	0.005506	0	0	0
	Otu00254	Proteobacteria(100)	Gammaproteobacteria(100)	Vibrionales(100)	Vibrionaceae(100)	Vibrio(80)		0	0	0	0	0	0	0	0	0	0	0	1	0	0	0		0	0	0	0	0	0	0	0	0	0	0	0.005506	0	0	0
	Otu00259	Proteobacteria(100)	Gammaproteobacteria(100)	Pseudomonadales(100)	Pseudomonadaceae(100)	unclassified(80)		0	0	0	0	0	0	0	0	0	0	1	0	0	0	0		0	0	0	0	0	0	0	0	0	0	0.00643459	0	0	0	0
	Otu00261	Proteobacteria(100)	Gammaproteobacteria(100)	Enterobacteriales(100)	Enterobacteriaceae(100)	Escherichia/Shigella(100)		0	0	0	0	0	0	0	0	0	0	0	1	0	0	0		0	0	0	0	0	0	0	0	0	0	0	0.005506	0	0	0
	Otu00270	Bacteroidetes(100)	Flavobacteriia(100)	Flavobacteriales(100)	Flavobacteriaceae(100)	Flavobacterium(100)		0	0	0	0	0	0	0	0	0	1	0	0	0	0	0		0	0	0	0	0	0	0	0	0	0.00285861	0	0	0	0	0
	Otu00303	Firmicutes(100)	Clostridia(100)	Clostridiales(100)	Lachnospiraceae(100)	Blautia(75)		0	0	0	0	0	0	0	1	0	0	0	0	0	0	0		0	0	0	0	0	0	0	0.0169924	0	0	0	0	0	0	0
	Otu00309	Actinobacteria(100)	Actinobacteria(100)	Actinomycetales(100)	Kineosporiaceae(100)	Kineococcus(100)		0	0	0	0	1	0	0	0	0	0	0	0	0	0	0		0	0	0	0	0.0117647	0	0	0	0	0	0	0	0	0	0
	Otu00310	Bacteroidetes(100)	Bacteroidia(100)	Bacteroidales(100)	Porphyromonadaceae(100)	Parabacteroides(100)		0	0	0	0	0	0	0	0	0	0	0	1	0	0	0		0	0	0	0	0	0	0	0	0	0	0	0.005506	0	0	0
	Otu00318	unclassified(100)	unclassified(100)	unclassified(100)	unclassified(100)	unclassified(100)		0	0	0	0	0	0	0	0	0	1	0	0	0	0	0		0	0	0	0	0	0	0	0	0	0.00285861	0	0	0	0	0
	Otu00325	unclassified(100)	unclassified(100)	unclassified(100)	unclassified(100)	unclassified(100)		0	0	0	0	0	0	0	0	1	0	0	0	0	0	0		0	0	0	0	0	0	0	0	0.00687285	0	0	0	0	0	0
	Otu00326	unclassified(100)	unclassified(100)	unclassified(100)	unclassified(100)	unclassified(100)		0	0	0	1	0	0	0	0	0	0	0	0	0	0	0		0	0	0	0.0207641	0	0	0	0	0	0	0	0	0	0	0
	Otu00335	Proteobacteria(100)	Gammaproteobacteria(100)	unclassified(100)	unclassified(100)	unclassified(100)		0	0	0	0	0	0	0	0	0	0	0	1	0	0	0		0	0	0	0	0	0	0	0	0	0	0	0.005506	0	0	0
	Otu00341	Proteobacteria(100)	Gammaproteobacteria(100)	Pasteurellales(100)	Pasteurellaceae(100)	unclassified(100)		0	0	0	0	0	0	0	0	0	0	1	0	0	0	0		0	0	0	0	0	0	0	0	0	0	0.00643459	0	0	0	0
	Otu00351	Firmicutes(100)	Bacilli(100)	Lactobacillales(100)	Leuconostocaceae(100)	Leuconostoc(100)		0	0	0	0	0	0	0	0	0	0	0	1	0	0	0		0	0	0	0	0	0	0	0	0	0	0	0.005506	0	0	0
	Otu00365	Firmicutes(100)	Negativicutes(100)	Selenomonadales(100)	Veillonellaceae(100)	Veillonella(100)		0	0	0	0	0	0	0	0	0	1	0	0	0	0	0		0	0	0	0	0	0	0	0	0	0.00285861	0	0	0	0	0
	Otu00369	Firmicutes(100)	Clostridia(100)	Clostridiales(100)	unclassified(67)	unclassified(67)		0	0	0	0	1	0	0	0	0	0	0	0	0	0	0		0	0	0	0	0.0117647	0	0	0	0	0	0	0	0	0	0
	Otu00370	Firmicutes(100)	Negativicutes(100)	Selenomonadales(100)	Veillonellaceae(100)	Veillonella(100)		0	0	0	1	0	0	0	0	0	0	0	0	0	0	0		0	0	0	0.0207641	0	0	0	0	0	0	0	0	0	0	0
	Otu00383	Bacteroidetes(100)	Bacteroidia(100)	Bacteroidales(100)	Bacteroidaceae(100)	Bacteroides(100)		0	0	0	0	0	0	0	0	0	1	0	0	0	0	0		0	0	0	0	0	0	0	0	0	0.00285861	0	0	0	0	0
	Otu00390	Firmicutes(100)	Bacilli(100)	Lactobacillales(100)	Streptococcaceae(100)	Streptococcus(100)		0	0	0	1	0	0	0	0	0	0	0	0	0	0	0		0	0	0	0.0207641	0	0	0	0	0	0	0	0	0	0	0
	Otu00402	Firmicutes(100)	Negativicutes(100)	Selenomonadales(100)	Veillonellaceae(100)	Veillonella(100)		0	0	0	0	0	0	0	0	0	0	0	1	0	0	0		0	0	0	0	0	0	0	0	0	0	0	0.005506	0	0	0
	Otu00412	Firmicutes(100)	Negativicutes(100)	Selenomonadales(100)	Veillonellaceae(100)	Veillonella(100)		0	0	0	0	0	0	0	0	0	0	1	0	0	0	0		0	0	0	0	0	0	0	0	0	0	0.00643459	0	0	0	0
	Otu00428	Firmicutes(100)	Erysipelotrichia(100)	Erysipelotrichales(100)	Erysipelotrichaceae(100)	Turicibacter(100)		0	0	0	0	0	0	0	0	0	0	0	1	0	0	0		0	0	0	0	0	0	0	0	0	0	0	0.005506	0	0	0
	Otu00443	Firmicutes(100)	Negativicutes(100)	Selenomonadales(100)	Veillonellaceae(100)	Veillonella(100)		0	0	0	0	0	0	0	0	0	0	0	1	0	0	0		0	0	0	0	0	0	0	0	0	0	0	0.005506	0	0	0
	Otu00446	Firmicutes(100)	Negativicutes(100)	Selenomonadales(100)	Veillonellaceae(100)	Veillonella(100)		0	0	0	0	0	0	0	0	0	0	1	0	0	0	0		0	0	0	0	0	0	0	0	0	0	0.00643459	0	0	0	0
	Otu00451	Firmicutes(100)	Negativicutes(100)	Selenomonadales(100)	Veillonellaceae(100)	unclassified(100)		0	0	0	0	0	0	0	0	0	0	1	0	0	0	0		0	0	0	0	0	0	0	0	0	0	0.00643459	0	0	0	0
	Otu00453	Firmicutes(100)	Negativicutes(100)	Selenomonadales(100)	Veillonellaceae(100)	Veillonella(100)		0	0	0	0	0	0	0	0	0	1	0	0	0	0	0		0	0	0	0	0	0	0	0	0	0.00285861	0	0	0	0	0
	Otu00462	Actinobacteria(100)	Actinobacteria(100)	Coriobacteriales(100)	Coriobacteriaceae(100)	unclassified(100)		0	0	0	0	0	0	0	0	0	0	0	1	0	0	0		0	0	0	0	0	0	0	0	0	0	0	0.005506	0	0	0
	Otu00466	Firmicutes(100)	Negativicutes(100)	Selenomonadales(100)	Veillonellaceae(100)	Veillonella(100)		0	0	0	0	0	0	0	0	0	0	1	0	0	0	0		0	0	0	0	0	0	0	0	0	0	0.00643459	0	0	0	0
	Otu00467	Firmicutes(100)	Negativicutes(100)	Selenomonadales(100)	Veillonellaceae(100)	Veillonella(100)		0	0	0	0	0	0	0	0	0	1	0	0	0	0	0		0	0	0	0	0	0	0	0	0	0.00285861	0	0	0	0	0
	Otu00468	Firmicutes(100)	Negativicutes(100)	Selenomonadales(100)	Veillonellaceae(100)	Veillonella(100)		0	0	0	0	0	0	0	0	0	0	1	0	0	0	0		0	0	0	0	0	0	0	0	0	0	0.00643459	0	0	0	0
	Otu00470	Proteobacteria(100)	Gammaproteobacteria(100)	Pasteurellales(100)	Pasteurellaceae(100)	unclassified(100)		0	0	0	0	0	0	0	0	1	0	0	0	0	0	0		0	0	0	0	0	0	0	0	0.00687285	0	0	0	0	0	0
	Otu00472	Firmicutes(100)	Negativicutes(100)	Selenomonadales(100)	Veillonellaceae(100)	unclassified(100)		0	0	0	0	0	0	0	0	0	0	1	0	0	0	0		0	0	0	0	0	0	0	0	0	0	0.00643459	0	0	0	0
	Otu00478	Firmicutes(100)	Negativicutes(100)	Selenomonadales(100)	Veillonellaceae(100)	Veillonella(100)		0	0	0	0	0	0	0	0	0	0	1	0	0	0	0		0	0	0	0	0	0	0	0	0	0	0.00643459	0	0	0	0
	Otu00481	Firmicutes(100)	Negativicutes(100)	Selenomonadales(100)	Veillonellaceae(100)	Veillonella(100)		0	0	0	0	0	0	0	0	0	0	1	0	0	0	0		0	0	0	0	0	0	0	0	0	0	0.00643459	0	0	0	0
	Otu00484	Proteobacteria(100)	Gammaproteobacteria(100)	Enterobacteriales(100)	Enterobacteriaceae(100)	Escherichia/Shigella(100)		0	0	0	0	0	0	0	0	0	0	0	1	0	0	0		0	0	0	0	0	0	0	0	0	0	0	0.005506	0	0	0
	Otu00492	Proteobacteria(100)	Alphaproteobacteria(100)	Caulobacterales(100)	Caulobacteraceae(100)	Brevundimonas(100)		0	0	0	0	0	0	0	0	0	1	0	0	0	0	0		0	0	0	0	0	0	0	0	0	0.00285861	0	0	0	0	0
	Otu00507	Firmicutes(100)	Clostridia(100)	Clostridiales(100)	unclassified(100)	unclassified(100)		0	0	0	0	0	0	0	0	1	0	0	0	0	0	0		0	0	0	0	0	0	0	0	0.00687285	0	0	0	0	0	0
	Otu00510	Firmicutes(100)	Clostridia(100)	Clostridiales(100)	Lachnospiraceae(100)	unclassified(100)		0	0	0	0	0	0	0	0	0	0	1	0	0	0	0		0	0	0	0	0	0	0	0	0	0	0.00643459	0	0	0	0
	Otu00513	Firmicutes(100)	Clostridia(100)	Clostridiales(100)	Lachnospiraceae(100)	Cellulosilyticum(100)		0	0	0	0	0	0	0	0	0	1	0	0	0	0	0		0	0	0	0	0	0	0	0	0	0.00285861	0	0	0	0	0
	Otu00516	Firmicutes(100)	Clostridia(100)	Clostridiales(100)	unclassified(100)	unclassified(100)		0	0	0	0	1	0	0	0	0	0	0	0	0	0	0		0	0	0	0	0.0117647	0	0	0	0	0	0	0	0	0	0
	Otu00525	Proteobacteria(100)	Alphaproteobacteria(100)	Rhizobiales(100)	unclassified(100)	unclassified(100)		0	0	0	0	0	0	0	0	0	1	0	0	0	0	0		0	0	0	0	0	0	0	0	0	0.00285861	0	0	0	0	0
	Otu00529	Bacteroidetes(100)	Bacteroidia(100)	Bacteroidales(100)	unclassified(100)	unclassified(100)		0	0	0	0	0	0	0	0	0	0	0	1	0	0	0		0	0	0	0	0	0	0	0	0	0	0	0.005506	0	0	0
	Otu00533	Firmicutes(100)	unclassified(100)	unclassified(100)	unclassified(100)	unclassified(100)		0	0	0	1	0	0	0	0	0	0	0	0	0	0	0		0	0	0	0.0207641	0	0	0	0	0	0	0	0	0	0	0
	Otu00544	Proteobacteria(100)	Gammaproteobacteria(100)	Enterobacteriales(100)	Enterobacteriaceae(100)	unclassified(100)		0	0	0	0	0	0	0	0	1	0	0	0	0	0	0		0	0	0	0	0	0	0	0	0.00687285	0	0	0	0	0	0
	Otu00549	Bacteroidetes(100)	Bacteroidia(100)	Bacteroidales(100)	Bacteroidaceae(100)	Bacteroides(100)		0	0	0	0	0	0	0	0	1	0	0	0	0	0	0		0	0	0	0	0	0	0	0	0.00687285	0	0	0	0	0	0
	Otu00556	Bacteroidetes(100)	Bacteroidia(100)	Bacteroidales(100)	unclassified(100)	unclassified(100)		0	0	0	0	0	0	1	0	0	0	0	0	0	0	0		0	0	0	0	0	0	0.00508776	0	0	0	0	0	0	0	0
	Otu00562	Bacteroidetes(100)	Bacteroidia(100)	Bacteroidales(100)	Porphyromonadaceae(100)	Parabacteroides(100)		0	0	0	0	0	0	0	0	0	0	0	1	0	0	0		0	0	0	0	0	0	0	0	0	0	0	0.005506	0	0	0
	Otu00563	Proteobacteria(100)	Gammaproteobacteria(100)	Enterobacteriales(100)	Enterobacteriaceae(100)	unclassified(100)		0	0	0	0	0	0	0	0	0	1	0	0	0	0	0		0	0	0	0	0	0	0	0	0	0.00285861	0	0	0	0	0
	Otu00575	Firmicutes(100)	Bacilli(100)	Lactobacillales(100)	Streptococcaceae(100)	Lactococcus(100)		0	0	0	0	0	1	0	0	0	0	0	0	0	0	0		0	0	0	0	0	0.0121007	0	0	0	0	0	0	0	0	0
	Otu00583	Actinobacteria(100)	Actinobacteria(100)	Actinomycetales(100)	Corynebacteriaceae(100)	Corynebacterium(100)		0	0	0	0	0	0	0	0	0	1	0	0	0	0	0		0	0	0	0	0	0	0	0	0	0.00285861	0	0	0	0	0
	Otu00586	Actinobacteria(100)	Actinobacteria(100)	Actinomycetales(100)	Actinomycetaceae(100)	Actinomyces(100)		0	0	0	0	0	0	0	0	0	0	1	0	0	0	0		0	0	0	0	0	0	0	0	0	0	0.00643459	0	0	0	0
	Otu00587	Actinobacteria(100)	Actinobacteria(100)	Actinomycetales(100)	Nocardioidaceae(100)	unclassified(100)		0	0	0	0	0	0	0	0	1	0	0	0	0	0	0		0	0	0	0	0	0	0	0	0.00687285	0	0	0	0	0	0
	Otu00595	unclassified(100)	unclassified(100)	unclassified(100)	unclassified(100)	unclassified(100)		0	0	0	0	0	0	0	0	0	1	0	0	0	0	0		0	0	0	0	0	0	0	0	0	0.00285861	0	0	0	0	0
	Otu00596	unclassified(100)	unclassified(100)	unclassified(100)	unclassified(100)	unclassified(100)		0	0	0	0	0	0	0	0	0	1	0	0	0	0	0		0	0	0	0	0	0	0	0	0	0.00285861	0	0	0	0	0
	Otu00599	unclassified(100)	unclassified(100)	unclassified(100)	unclassified(100)	unclassified(100)		0	0	0	0	0	0	0	0	0	0	0	1	0	0	0		0	0	0	0	0	0	0	0	0	0	0	0.005506	0	0	0
	Otu00632	Proteobacteria(100)	Gammaproteobacteria(100)	Vibrionales(100)	Vibrionaceae(100)	unclassified(100)		0	0	0	0	0	0	0	0	0	0	0	1	0	0	0		0	0	0	0	0	0	0	0	0	0	0	0.005506	0	0	0
	Otu00645	Firmicutes(100)	Clostridia(100)	Clostridiales(100)	Clostridiaceae_1(100)	unclassified(100)		0	0	0	0	0	1	0	0	0	0	0	0	0	0	0		0	0	0	0	0	0.0121007	0	0	0	0	0	0	0	0	0
	Otu00668	Bacteroidetes(100)	Bacteroidia(100)	Bacteroidales(100)	Bacteroidaceae(100)	Bacteroides(100)		0	0	0	0	0	0	1	0	0	0	0	0	0	0	0		0	0	0	0	0	0	0.00508776	0	0	0	0	0	0	0	0
	Otu00669	Bacteroidetes(100)	Bacteroidia(100)	Bacteroidales(100)	Porphyromonadaceae(100)	Parabacteroides(100)		0	0	0	0	0	0	0	0	0	1	0	0	0	0	0		0	0	0	0	0	0	0	0	0	0.00285861	0	0	0	0	0
	Otu00670	Bacteroidetes(100)	Bacteroidia(100)	Bacteroidales(100)	Porphyromonadaceae(100)	Parabacteroides(100)		0	0	0	0	0	0	0	0	0	0	0	1	0	0	0		0	0	0	0	0	0	0	0	0	0	0	0.005506	0	0	0
	Otu00672	Bacteroidetes(100)	Bacteroidia(100)	Bacteroidales(100)	Bacteroidaceae(100)	Bacteroides(100)		0	0	0	0	0	0	0	0	0	0	1	0	0	0	0		0	0	0	0	0	0	0	0	0	0	0.00643459	0	0	0	0
	Otu00678	Bacteroidetes(100)	Bacteroidia(100)	Bacteroidales(100)	Bacteroidaceae(100)	Bacteroides(100)		0	0	0	0	0	0	0	1	0	0	0	0	0	0	0		0	0	0	0	0	0	0	0.0169924	0	0	0	0	0	0	0
	Otu00681	Proteobacteria(100)	Gammaproteobacteria(100)	Xanthomonadales(100)	Xanthomonadaceae(100)	unclassified(100)		0	0	0	0	0	0	0	0	0	1	0	0	0	0	0		0	0	0	0	0	0	0	0	0	0.00285861	0	0	0	0	0
	Otu00682	Proteobacteria(100)	Gammaproteobacteria(100)	Xanthomonadales(100)	Xanthomonadaceae(100)	Luteimonas(100)		0	0	0	0	0	1	0	0	0	0	0	0	0	0	0		0	0	0	0	0	0.0121007	0	0	0	0	0	0	0	0	0
	Otu00685	Firmicutes(100)	Clostridia(100)	Clostridiales(100)	Clostridiaceae_1(100)	unclassified(100)		0	0	0	0	1	0	0	0	0	0	0	0	0	0	0		0	0	0	0	0.0117647	0	0	0	0	0	0	0	0	0	0
	Otu00691	Bacteroidetes(100)	Bacteroidia(100)	Bacteroidales(100)	Bacteroidaceae(100)	Bacteroides(100)		0	0	0	0	0	0	0	0	0	0	1	0	0	0	0		0	0	0	0	0	0	0	0	0	0	0.00643459	0	0	0	0
	Otu00693	Bacteroidetes(100)	Bacteroidia(100)	Bacteroidales(100)	Bacteroidaceae(100)	Bacteroides(100)		0	0	0	0	0	0	0	0	0	0	0	1	0	0	0		0	0	0	0	0	0	0	0	0	0	0	0.005506	0	0	0
	Otu00694	Bacteroidetes(100)	Bacteroidia(100)	Bacteroidales(100)	Bacteroidaceae(100)	Bacteroides(100)		0	0	0	0	0	0	0	0	0	0	0	1	0	0	0		0	0	0	0	0	0	0	0	0	0	0	0.005506	0	0	0
	Otu00695	Bacteroidetes(100)	Bacteroidia(100)	Bacteroidales(100)	Prevotellaceae(100)	Prevotella(100)		0	0	0	0	0	0	0	1	0	0	0	0	0	0	0		0	0	0	0	0	0	0	0.0169924	0	0	0	0	0	0	0
	Otu00697	Bacteroidetes(100)	Bacteroidia(100)	Bacteroidales(100)	unclassified(100)	unclassified(100)		0	0	0	0	0	0	0	0	0	1	0	0	0	0	0		0	0	0	0	0	0	0	0	0	0.00285861	0	0	0	0	0
	Otu00699	Bacteroidetes(100)	Bacteroidia(100)	Bacteroidales(100)	Bacteroidaceae(100)	Bacteroides(100)		0	0	0	0	0	0	0	0	0	0	0	1	0	0	0		0	0	0	0	0	0	0	0	0	0	0	0.005506	0	0	0
	Otu00701	Bacteroidetes(100)	Bacteroidia(100)	Bacteroidales(100)	Bacteroidaceae(100)	Bacteroides(100)		0	0	0	0	0	0	0	0	0	1	0	0	0	0	0		0	0	0	0	0	0	0	0	0	0.00285861	0	0	0	0	0
	Otu00702	Bacteroidetes(100)	Bacteroidia(100)	Bacteroidales(100)	Bacteroidaceae(100)	Bacteroides(100)		0	0	0	0	0	0	0	0	0	1	0	0	0	0	0		0	0	0	0	0	0	0	0	0	0.00285861	0	0	0	0	0
	Otu00703	Bacteroidetes(100)	Bacteroidia(100)	Bacteroidales(100)	Bacteroidaceae(100)	Bacteroides(100)		0	0	0	0	0	0	0	0	0	0	0	1	0	0	0		0	0	0	0	0	0	0	0	0	0	0	0.005506	0	0	0
	Otu00706	Bacteroidetes(100)	Bacteroidia(100)	Bacteroidales(100)	Bacteroidaceae(100)	Bacteroides(100)		0	0	0	0	0	0	0	0	0	1	0	0	0	0	0		0	0	0	0	0	0	0	0	0	0.00285861	0	0	0	0	0
	Otu00707	Bacteroidetes(100)	Bacteroidia(100)	Bacteroidales(100)	Bacteroidaceae(100)	Bacteroides(100)		0	0	0	0	0	0	0	0	1	0	0	0	0	0	0		0	0	0	0	0	0	0	0	0.00687285	0	0	0	0	0	0
	Otu00748	Firmicutes(100)	unclassified(100)	unclassified(100)	unclassified(100)	unclassified(100)		0	0	0	0	0	0	1	0	0	0	0	0	0	0	0		0	0	0	0	0	0	0.00508776	0	0	0	0	0	0	0	0
	Otu00759	Firmicutes(100)	unclassified(100)	unclassified(100)	unclassified(100)	unclassified(100)		0	0	0	0	0	1	0	0	0	0	0	0	0	0	0		0	0	0	0	0	0.0121007	0	0	0	0	0	0	0	0	0
	Otu00761	Firmicutes(100)	unclassified(100)	unclassified(100)	unclassified(100)	unclassified(100)		0	0	0	0	0	0	1	0	0	0	0	0	0	0	0		0	0	0	0	0	0	0.00508776	0	0	0	0	0	0	0	0
	Otu00762	Firmicutes(100)	unclassified(100)	unclassified(100)	unclassified(100)	unclassified(100)		0	0	0	0	0	0	0	0	0	0	0	1	0	0	0		0	0	0	0	0	0	0	0	0	0	0	0.005506	0	0	0
	Otu00763	Firmicutes(100)	unclassified(100)	unclassified(100)	unclassified(100)	unclassified(100)		0	0	0	0	0	0	0	0	0	0	0	1	0	0	0		0	0	0	0	0	0	0	0	0	0	0	0.005506	0	0	0
	Otu00764	Firmicutes(100)	unclassified(100)	unclassified(100)	unclassified(100)	unclassified(100)		0	0	0	0	0	0	0	0	0	1	0	0	0	0	0		0	0	0	0	0	0	0	0	0	0.00285861	0	0	0	0	0
	Otu00774	Firmicutes(100)	Clostridia(100)	Clostridiales(100)	Ruminococcaceae(100)	unclassified(100)		0	0	0	0	0	0	0	0	0	1	0	0	0	0	0		0	0	0	0	0	0	0	0	0	0.00285861	0	0	0	0	0
	Otu00776	Firmicutes(100)	Clostridia(100)	Clostridiales(100)	Lachnospiraceae(100)	Clostridium_XlVa(100)		0	0	0	0	0	0	0	0	0	1	0	0	0	0	0		0	0	0	0	0	0	0	0	0	0.00285861	0	0	0	0	0
	Otu00778	Firmicutes(100)	Clostridia(100)	Clostridiales(100)	Clostridiaceae_1(100)	unclassified(100)		0	0	0	0	0	0	0	0	0	1	0	0	0	0	0		0	0	0	0	0	0	0	0	0	0.00285861	0	0	0	0	0
	Otu00828	Firmicutes(100)	unclassified(100)	unclassified(100)	unclassified(100)	unclassified(100)		0	0	0	1	0	0	0	0	0	0	0	0	0	0	0		0	0	0	0.0207641	0	0	0	0	0	0	0	0	0	0	0
	Otu00859	Firmicutes(100)	Clostridia(100)	Clostridiales(100)	unclassified(100)	unclassified(100)		0	0	0	0	0	0	0	0	0	0	0	1	0	0	0		0	0	0	0	0	0	0	0	0	0	0	0.005506	0	0	0
	Otu00862	Firmicutes(100)	Clostridia(100)	Clostridiales(100)	Lachnospiraceae(100)	unclassified(100)		0	0	0	0	0	0	0	0	0	0	1	0	0	0	0		0	0	0	0	0	0	0	0	0	0	0.00643459	0	0	0	0
	Otu00880	Firmicutes(100)	Clostridia(100)	Clostridiales(100)	Clostridiaceae_1(100)	Clostridium_sensu_stricto(100)		0	0	0	0	0	0	1	0	0	0	0	0	0	0	0		0	0	0	0	0	0	0.00508776	0	0	0	0	0	0	0	0
	Otu00883	Firmicutes(100)	Clostridia(100)	Clostridiales(100)	Clostridiaceae_1(100)	unclassified(100)		0	0	0	0	0	0	1	0	0	0	0	0	0	0	0		0	0	0	0	0	0	0.00508776	0	0	0	0	0	0	0	0
	Otu00884	Firmicutes(100)	Clostridia(100)	Clostridiales(100)	Clostridiales_Incertae_Sedis_XI(100)	Sedimentibacter(100)		0	0	0	0	0	0	1	0	0	0	0	0	0	0	0		0	0	0	0	0	0	0.00508776	0	0	0	0	0	0	0	0
	Otu00911	Firmicutes(100)	Clostridia(100)	Clostridiales(100)	Lachnospiraceae(100)	unclassified(100)		0	0	0	0	0	0	0	0	0	0	1	0	0	0	0		0	0	0	0	0	0	0	0	0	0	0.00643459	0	0	0	0
	Otu00912	Firmicutes(100)	Clostridia(100)	Clostridiales(100)	Lachnospiraceae(100)	unclassified(100)		0	0	0	0	0	0	0	0	0	1	0	0	0	0	0		0	0	0	0	0	0	0	0	0	0.00285861	0	0	0	0	0
	Otu00913	Firmicutes(100)	Clostridia(100)	Clostridiales(100)	Clostridiaceae_1(100)	unclassified(100)		0	0	0	0	0	0	0	0	0	0	0	1	0	0	0		0	0	0	0	0	0	0	0	0	0	0	0.005506	0	0	0
	Otu00921	Firmicutes(100)	Clostridia(100)	Clostridiales(100)	Clostridiaceae_1(100)	Clostridium_sensu_stricto(100)		0	0	0	0	0	0	0	0	1	0	0	0	0	0	0		0	0	0	0	0	0	0	0	0.00687285	0	0	0	0	0	0
	Otu00932	unclassified(100)	unclassified(100)	unclassified(100)	unclassified(100)	unclassified(100)		0	0	0	0	0	0	0	0	0	0	0	1	0	0	0		0	0	0	0	0	0	0	0	0	0	0	0.005506	0	0	0
	Otu00933	unclassified(100)	unclassified(100)	unclassified(100)	unclassified(100)	unclassified(100)		0	0	0	0	0	0	0	0	0	0	0	1	0	0	0		0	0	0	0	0	0	0	0	0	0	0	0.005506	0	0	0
	Otu00938	unclassified(100)	unclassified(100)	unclassified(100)	unclassified(100)	unclassified(100)		0	0	0	1	0	0	0	0	0	0	0	0	0	0	0		0	0	0	0.0207641	0	0	0	0	0	0	0	0	0	0	0
	Otu00940	unclassified(100)	unclassified(100)	unclassified(100)	unclassified(100)	unclassified(100)		0	0	0	0	0	0	0	0	0	0	0	1	0	0	0		0	0	0	0	0	0	0	0	0	0	0	0.005506	0	0	0
	Otu00941	unclassified(100)	unclassified(100)	unclassified(100)	unclassified(100)	unclassified(100)		0	0	0	0	0	0	0	0	1	0	0	0	0	0	0		0	0	0	0	0	0	0	0	0.00687285	0	0	0	0	0	0
	Otu00942	unclassified(100)	unclassified(100)	unclassified(100)	unclassified(100)	unclassified(100)		0	0	0	0	0	0	0	0	0	0	0	1	0	0	0		0	0	0	0	0	0	0	0	0	0	0	0.005506	0	0	0
	Otu00943	unclassified(100)	unclassified(100)	unclassified(100)	unclassified(100)	unclassified(100)		0	0	0	0	0	0	0	0	0	0	0	1	0	0	0		0	0	0	0	0	0	0	0	0	0	0	0.005506	0	0	0
	Otu00944	unclassified(100)	unclassified(100)	unclassified(100)	unclassified(100)	unclassified(100)		0	0	0	0	0	0	1	0	0	0	0	0	0	0	0		0	0	0	0	0	0	0.00508776	0	0	0	0	0	0	0	0
	Otu00950	unclassified(100)	unclassified(100)	unclassified(100)	unclassified(100)	unclassified(100)		0	0	0	0	0	0	1	0	0	0	0	0	0	0	0		0	0	0	0	0	0	0.00508776	0	0	0	0	0	0	0	0
	Otu00951	unclassified(100)	unclassified(100)	unclassified(100)	unclassified(100)	unclassified(100)		0	0	0	0	0	0	0	0	1	0	0	0	0	0	0		0	0	0	0	0	0	0	0	0.00687285	0	0	0	0	0	0
	Otu00952	unclassified(100)	unclassified(100)	unclassified(100)	unclassified(100)	unclassified(100)		0	0	0	0	0	0	0	0	1	0	0	0	0	0	0		0	0	0	0	0	0	0	0	0.00687285	0	0	0	0	0	0
	Otu00953	unclassified(100)	unclassified(100)	unclassified(100)	unclassified(100)	unclassified(100)		0	0	0	0	0	0	0	0	1	0	0	0	0	0	0		0	0	0	0	0	0	0	0	0.00687285	0	0	0	0	0	0
	Otu00954	unclassified(100)	unclassified(100)	unclassified(100)	unclassified(100)	unclassified(100)		0	0	0	0	0	0	0	0	1	0	0	0	0	0	0		0	0	0	0	0	0	0	0	0.00687285	0	0	0	0	0	0
	Otu00955	unclassified(100)	unclassified(100)	unclassified(100)	unclassified(100)	unclassified(100)		0	0	0	0	0	0	0	0	1	0	0	0	0	0	0		0	0	0	0	0	0	0	0	0.00687285	0	0	0	0	0	0
	Otu00978	Bacteroidetes(100)	unclassified(100)	unclassified(100)	unclassified(100)	unclassified(100)		0	0	0	0	0	0	0	0	0	1	0	0	0	0	0		0	0	0	0	0	0	0	0	0	0.00285861	0	0	0	0	0
	Otu00979	Bacteroidetes(100)	unclassified(100)	unclassified(100)	unclassified(100)	unclassified(100)		0	0	0	0	0	0	0	0	0	0	1	0	0	0	0		0	0	0	0	0	0	0	0	0	0	0.00643459	0	0	0	0
	Otu00980	Bacteroidetes(100)	unclassified(100)	unclassified(100)	unclassified(100)	unclassified(100)		0	0	0	0	0	0	0	0	0	0	0	1	0	0	0		0	0	0	0	0	0	0	0	0	0	0	0.005506	0	0	0
	Otu01009	unclassified(100)	unclassified(100)	unclassified(100)	unclassified(100)	unclassified(100)		0	0	0	0	1	0	0	0	0	0	0	0	0	0	0		0	0	0	0	0.0117647	0	0	0	0	0	0	0	0	0	0
	Otu01017	unclassified(100)	unclassified(100)	unclassified(100)	unclassified(100)	unclassified(100)		0	0	0	0	0	0	0	0	0	0	0	1	0	0	0		0	0	0	0	0	0	0	0	0	0	0	0.005506	0	0	0
	Otu01018	unclassified(100)	unclassified(100)	unclassified(100)	unclassified(100)	unclassified(100)		0	0	0	0	0	0	0	0	0	0	0	1	0	0	0		0	0	0	0	0	0	0	0	0	0	0	0.005506	0	0	0
	Otu01019	unclassified(100)	unclassified(100)	unclassified(100)	unclassified(100)	unclassified(100)		0	0	0	0	0	0	0	0	0	0	1	0	0	0	0		0	0	0	0	0	0	0	0	0	0	0.00643459	0	0	0	0
	Otu01020	unclassified(100)	unclassified(100)	unclassified(100)	unclassified(100)	unclassified(100)		0	0	0	0	0	0	0	0	0	0	1	0	0	0	0		0	0	0	0	0	0	0	0	0	0	0.00643459	0	0	0	0
	Otu01021	unclassified(100)	unclassified(100)	unclassified(100)	unclassified(100)	unclassified(100)		0	0	0	0	0	0	0	0	0	1	0	0	0	0	0		0	0	0	0	0	0	0	0	0	0.00285861	0	0	0	0	0
	Otu01022	unclassified(100)	unclassified(100)	unclassified(100)	unclassified(100)	unclassified(100)		0	0	0	0	0	0	0	0	0	1	0	0	0	0	0		0	0	0	0	0	0	0	0	0	0.00285861	0	0	0	0	0
	Otu01023	unclassified(100)	unclassified(100)	unclassified(100)	unclassified(100)	unclassified(100)		0	0	0	0	0	0	0	0	0	1	0	0	0	0	0		0	0	0	0	0	0	0	0	0	0.00285861	0	0	0	0	0
	Otu01024	unclassified(100)	unclassified(100)	unclassified(100)	unclassified(100)	unclassified(100)		0	0	0	0	0	0	0	0	0	1	0	0	0	0	0		0	0	0	0	0	0	0	0	0	0.00285861	0	0	0	0	0
	Otu01025	unclassified(100)	unclassified(100)	unclassified(100)	unclassified(100)	unclassified(100)		0	0	0	0	0	0	0	0	0	1	0	0	0	0	0		0	0	0	0	0	0	0	0	0	0.00285861	0	0	0	0	0
	Otu01030	Actinobacteria(100)	Actinobacteria(100)	Bifidobacteriales(100)	Bifidobacteriaceae(100)	Bifidobacterium(100)		0	0	0	1	0	0	0	0	0	0	0	0	0	0	0		0	0	0	0.0207641	0	0	0	0	0	0	0	0	0	0	0
	Otu01064	Bacteroidetes(100)	Sphingobacteriia(100)	Sphingobacteriales(100)	Sphingobacteriaceae(100)	unclassified(100)		0	0	0	0	0	0	1	0	0	0	0	0	0	0	0		0	0	0	0	0	0	0.00508776	0	0	0	0	0	0	0	0
	Otu01067	Bacteroidetes(100)	Sphingobacteriia(100)	Sphingobacteriales(100)	Sphingobacteriaceae(100)	Sphingobacterium(100)		0	0	0	0	0	0	0	0	0	0	0	1	0	0	0		0	0	0	0	0	0	0	0	0	0	0	0.005506	0	0	0
	Otu01068	Bacteroidetes(100)	Sphingobacteriia(100)	Sphingobacteriales(100)	Sphingobacteriaceae(100)	Sphingobacterium(100)		0	0	0	0	0	0	0	0	0	0	0	1	0	0	0		0	0	0	0	0	0	0	0	0	0	0	0.005506	0	0	0
	Otu01069	Bacteroidetes(100)	Sphingobacteriia(100)	Sphingobacteriales(100)	Sphingobacteriaceae(100)	Olivibacter(100)		0	0	0	0	0	0	0	0	0	1	0	0	0	0	0		0	0	0	0	0	0	0	0	0	0.00285861	0	0	0	0	0
	Otu01072	Bacteroidetes(100)	Sphingobacteriia(100)	Sphingobacteriales(100)	Chitinophagaceae(100)	Niastella(100)		0	0	0	0	0	0	1	0	0	0	0	0	0	0	0		0	0	0	0	0	0	0.00508776	0	0	0	0	0	0	0	0
	Otu01082	Bacteroidetes(100)	Sphingobacteriia(100)	Sphingobacteriales(100)	Chitinophagaceae(100)	unclassified(100)		0	0	0	0	0	0	0	0	1	0	0	0	0	0	0		0	0	0	0	0	0	0	0	0.00687285	0	0	0	0	0	0
	Otu01096	Actinobacteria(100)	Actinobacteria(100)	Coriobacteriales(100)	Coriobacteriaceae(100)	Olsenella(100)		0	0	0	1	0	0	0	0	0	0	0	0	0	0	0		0	0	0	0.0207641	0	0	0	0	0	0	0	0	0	0	0
	Otu01104	Actinobacteria(100)	Actinobacteria(100)	Coriobacteriales(100)	Coriobacteriaceae(100)	Olsenella(100)		0	0	0	0	1	0	0	0	0	0	0	0	0	0	0		0	0	0	0	0.0117647	0	0	0	0	0	0	0	0	0	0
	Otu01106	Actinobacteria(100)	Actinobacteria(100)	Coriobacteriales(100)	Coriobacteriaceae(100)	Olsenella(100)		0	0	0	0	0	0	1	0	0	0	0	0	0	0	0		0	0	0	0	0	0	0.00508776	0	0	0	0	0	0	0	0
	Otu01107	Actinobacteria(100)	Actinobacteria(100)	Coriobacteriales(100)	Coriobacteriaceae(100)	unclassified(100)		0	0	0	0	0	0	0	0	0	0	0	1	0	0	0		0	0	0	0	0	0	0	0	0	0	0	0.005506	0	0	0
	Otu01123	Proteobacteria(100)	Betaproteobacteria(100)	unclassified(100)	unclassified(100)	unclassified(100)		0	0	0	0	0	0	0	0	0	1	0	0	0	0	0		0	0	0	0	0	0	0	0	0	0.00285861	0	0	0	0	0
	Otu01127	Bacteroidetes(100)	Flavobacteriia(100)	Flavobacteriales(100)	Flavobacteriaceae(100)	Flavobacterium(100)		0	0	0	0	0	0	1	0	0	0	0	0	0	0	0		0	0	0	0	0	0	0.00508776	0	0	0	0	0	0	0	0
	Otu01138	Proteobacteria(100)	Alphaproteobacteria(100)	Rhizobiales(100)	unclassified(100)	unclassified(100)		0	0	0	1	0	0	0	0	0	0	0	0	0	0	0		0	0	0	0.0207641	0	0	0	0	0	0	0	0	0	0	0
	Otu01139	Proteobacteria(100)	Gammaproteobacteria(100)	Pseudomonadales(100)	Pseudomonadaceae(100)	unclassified(100)		0	0	0	0	0	0	0	0	0	0	0	1	0	0	0		0	0	0	0	0	0	0	0	0	0	0	0.005506	0	0	0
	Otu01148	Proteobacteria(100)	Alphaproteobacteria(100)	Rhizobiales(100)	unclassified(100)	unclassified(100)		0	0	0	0	0	0	0	0	1	0	0	0	0	0	0		0	0	0	0	0	0	0	0	0.00687285	0	0	0	0	0	0
	Otu01150	Proteobacteria(100)	Alphaproteobacteria(100)	Rhizobiales(100)	Brucellaceae(100)	unclassified(100)		0	0	0	0	0	0	0	0	0	1	0	0	0	0	0		0	0	0	0	0	0	0	0	0	0.00285861	0	0	0	0	0
	Otu01155	Proteobacteria(100)	unclassified(100)	unclassified(100)	unclassified(100)	unclassified(100)		0	0	0	0	0	0	0	0	0	0	1	0	0	0	0		0	0	0	0	0	0	0	0	0	0	0.00643459	0	0	0	0
	Otu01165	Proteobacteria(100)	Betaproteobacteria(100)	Burkholderiales(100)	Oxalobacteraceae(100)	Naxibacter(100)		0	0	0	0	1	0	0	0	0	0	0	0	0	0	0		0	0	0	0	0.0117647	0	0	0	0	0	0	0	0	0	0
	Otu01178	Actinobacteria(100)	Actinobacteria(100)	Bifidobacteriales(100)	Bifidobacteriaceae(100)	unclassified(100)		0	0	0	0	0	0	0	0	0	0	0	1	0	0	0		0	0	0	0	0	0	0	0	0	0	0	0.005506	0	0	0
	Otu01181	Proteobacteria(100)	Betaproteobacteria(100)	Burkholderiales(100)	Sutterellaceae(100)	Parasutterella(100)		0	0	0	0	0	0	0	0	1	0	0	0	0	0	0		0	0	0	0	0	0	0	0	0.00687285	0	0	0	0	0	0
	Otu01183	Proteobacteria(100)	Betaproteobacteria(100)	Burkholderiales(100)	Alcaligenaceae(100)	Paenalcaligenes(100)		0	0	0	0	0	0	1	0	0	0	0	0	0	0	0		0	0	0	0	0	0	0.00508776	0	0	0	0	0	0	0	0
	Otu01187	Proteobacteria(100)	Deltaproteobacteria(100)	Desulfovibrionales(100)	Desulfovibrionaceae(100)	unclassified(100)		0	0	0	0	0	0	0	0	1	0	0	0	0	0	0		0	0	0	0	0	0	0	0	0.00687285	0	0	0	0	0	0
	Otu01189	Proteobacteria(100)	Deltaproteobacteria(100)	Desulfovibrionales(100)	unclassified(100)	unclassified(100)		0	0	0	0	0	0	0	1	0	0	0	0	0	0	0		0	0	0	0	0	0	0	0.0169924	0	0	0	0	0	0	0
	Otu01190	Proteobacteria(100)	Deltaproteobacteria(100)	Desulfovibrionales(100)	Desulfovibrionaceae(100)	Bilophila(100)		0	0	0	0	0	0	0	0	0	0	1	0	0	0	0		0	0	0	0	0	0	0	0	0	0	0.00643459	0	0	0	0
	Otu01191	Proteobacteria(100)	Deltaproteobacteria(100)	Desulfovibrionales(100)	Desulfovibrionaceae(100)	unclassified(100)		0	0	0	0	0	0	0	0	0	0	1	0	0	0	0		0	0	0	0	0	0	0	0	0	0	0.00643459	0	0	0	0
	Otu01194	Bacteroidetes(100)	Bacteroidia(100)	Bacteroidales(100)	Bacteroidaceae(100)	Bacteroides(100)		0	0	0	0	0	0	0	0	0	1	0	0	0	0	0		0	0	0	0	0	0	0	0	0	0.00285861	0	0	0	0	0
	Otu01196	Bacteroidetes(100)	Bacteroidia(100)	Bacteroidales(100)	Bacteroidaceae(100)	Bacteroides(100)		0	0	0	0	0	0	0	0	0	1	0	0	0	0	0		0	0	0	0	0	0	0	0	0	0.00285861	0	0	0	0	0
	Otu01197	Bacteroidetes(100)	Bacteroidia(100)	Bacteroidales(100)	Bacteroidaceae(100)	Bacteroides(100)		0	0	0	0	0	0	0	0	0	0	0	1	0	0	0		0	0	0	0	0	0	0	0	0	0	0	0.005506	0	0	0
	Otu01199	Bacteroidetes(100)	Bacteroidia(100)	Bacteroidales(100)	Porphyromonadaceae(100)	Parabacteroides(100)		0	0	0	0	0	0	0	0	0	1	0	0	0	0	0		0	0	0	0	0	0	0	0	0	0.00285861	0	0	0	0	0
	Otu01200	Bacteroidetes(100)	Bacteroidia(100)	Bacteroidales(100)	unclassified(100)	unclassified(100)		0	0	0	0	0	0	0	0	0	0	1	0	0	0	0		0	0	0	0	0	0	0	0	0	0	0.00643459	0	0	0	0
	Otu01201	Bacteroidetes(100)	Bacteroidia(100)	Bacteroidales(100)	Bacteroidaceae(100)	Bacteroides(100)		0	0	0	0	0	0	0	0	0	0	1	0	0	0	0		0	0	0	0	0	0	0	0	0	0	0.00643459	0	0	0	0
	Otu01202	Bacteroidetes(100)	Bacteroidia(100)	Bacteroidales(100)	Bacteroidaceae(100)	Bacteroides(100)		0	0	0	0	0	0	0	0	0	1	0	0	0	0	0		0	0	0	0	0	0	0	0	0	0.00285861	0	0	0	0	0
	Otu01204	Bacteroidetes(100)	Bacteroidia(100)	Bacteroidales(100)	unclassified(100)	unclassified(100)		0	0	0	0	0	0	0	0	0	1	0	0	0	0	0		0	0	0	0	0	0	0	0	0	0.00285861	0	0	0	0	0
	Otu01205	Bacteroidetes(100)	Bacteroidia(100)	Bacteroidales(100)	Bacteroidaceae(100)	Bacteroides(100)		0	0	0	0	0	0	0	0	0	1	0	0	0	0	0		0	0	0	0	0	0	0	0	0	0.00285861	0	0	0	0	0
	Otu01206	Bacteroidetes(100)	Bacteroidia(100)	Bacteroidales(100)	Bacteroidaceae(100)	Bacteroides(100)		0	0	0	0	0	0	0	0	0	0	0	1	0	0	0		0	0	0	0	0	0	0	0	0	0	0	0.005506	0	0	0
	Otu01207	Bacteroidetes(100)	Bacteroidia(100)	Bacteroidales(100)	Porphyromonadaceae(100)	Parabacteroides(100)		0	0	0	0	0	0	0	0	0	0	1	0	0	0	0		0	0	0	0	0	0	0	0	0	0	0.00643459	0	0	0	0
	Otu01208	Bacteroidetes(100)	Bacteroidia(100)	Bacteroidales(100)	unclassified(100)	unclassified(100)		0	0	0	0	0	0	0	0	0	0	0	1	0	0	0		0	0	0	0	0	0	0	0	0	0	0	0.005506	0	0	0
	Otu01210	Bacteroidetes(100)	Bacteroidia(100)	Bacteroidales(100)	Bacteroidaceae(100)	Bacteroides(100)		0	0	0	0	0	0	0	0	0	0	0	1	0	0	0		0	0	0	0	0	0	0	0	0	0	0	0.005506	0	0	0
	Otu01212	Bacteroidetes(100)	Bacteroidia(100)	Bacteroidales(100)	Bacteroidaceae(100)	Bacteroides(100)		0	0	0	0	0	0	0	0	0	0	0	1	0	0	0		0	0	0	0	0	0	0	0	0	0	0	0.005506	0	0	0
	Otu01213	Bacteroidetes(100)	Bacteroidia(100)	Bacteroidales(100)	Bacteroidaceae(100)	Bacteroides(100)		0	0	0	0	0	0	0	0	0	1	0	0	0	0	0		0	0	0	0	0	0	0	0	0	0.00285861	0	0	0	0	0
	Otu01214	Bacteroidetes(100)	Bacteroidia(100)	Bacteroidales(100)	unclassified(100)	unclassified(100)		0	0	0	0	0	0	0	0	0	1	0	0	0	0	0		0	0	0	0	0	0	0	0	0	0.00285861	0	0	0	0	0
	Otu01215	Bacteroidetes(100)	Bacteroidia(100)	Bacteroidales(100)	Bacteroidaceae(100)	Bacteroides(100)		0	0	0	0	0	0	0	0	0	0	0	1	0	0	0		0	0	0	0	0	0	0	0	0	0	0	0.005506	0	0	0
	Otu01216	Bacteroidetes(100)	Bacteroidia(100)	Bacteroidales(100)	Bacteroidaceae(100)	Bacteroides(100)		0	0	0	0	0	0	1	0	0	0	0	0	0	0	0		0	0	0	0	0	0	0.00508776	0	0	0	0	0	0	0	0
	Otu01217	Bacteroidetes(100)	Bacteroidia(100)	Bacteroidales(100)	unclassified(100)	unclassified(100)		0	0	0	0	0	0	1	0	0	0	0	0	0	0	0		0	0	0	0	0	0	0.00508776	0	0	0	0	0	0	0	0
	Otu01218	Bacteroidetes(100)	Bacteroidia(100)	Bacteroidales(100)	unclassified(100)	unclassified(100)		0	0	0	0	0	0	1	0	0	0	0	0	0	0	0		0	0	0	0	0	0	0.00508776	0	0	0	0	0	0	0	0
	Otu01219	Bacteroidetes(100)	Bacteroidia(100)	Bacteroidales(100)	Bacteroidaceae(100)	Bacteroides(100)		0	0	0	0	0	0	1	0	0	0	0	0	0	0	0		0	0	0	0	0	0	0.00508776	0	0	0	0	0	0	0	0
	Otu01220	Bacteroidetes(100)	Bacteroidia(100)	Bacteroidales(100)	Bacteroidaceae(100)	Bacteroides(100)		0	0	0	0	0	0	0	0	0	0	0	1	0	0	0		0	0	0	0	0	0	0	0	0	0	0	0.005506	0	0	0
	Otu01221	Bacteroidetes(100)	Bacteroidia(100)	Bacteroidales(100)	Porphyromonadaceae(100)	Parabacteroides(100)		0	0	0	0	0	0	0	0	0	1	0	0	0	0	0		0	0	0	0	0	0	0	0	0	0.00285861	0	0	0	0	0
	Otu01225	Bacteroidetes(100)	Bacteroidia(100)	Bacteroidales(100)	Bacteroidaceae(100)	Bacteroides(100)		0	0	0	0	0	0	0	0	0	0	0	1	0	0	0		0	0	0	0	0	0	0	0	0	0	0	0.005506	0	0	0
	Otu01228	Bacteroidetes(100)	Bacteroidia(100)	Bacteroidales(100)	Bacteroidaceae(100)	Bacteroides(100)		0	0	0	0	0	0	0	0	0	1	0	0	0	0	0		0	0	0	0	0	0	0	0	0	0.00285861	0	0	0	0	0
	Otu01231	Candidatus_Saccharibacteria(100)	unclassified(100)	unclassified(100)	unclassified(100)	unclassified(100)		0	0	0	0	0	0	0	0	1	0	0	0	0	0	0		0	0	0	0	0	0	0	0	0.00687285	0	0	0	0	0	0
	Otu01244	Bacteroidetes(100)	Bacteroidia(100)	Bacteroidales(100)	Bacteroidaceae(100)	Bacteroides(100)		0	0	0	0	0	0	0	0	0	0	0	1	0	0	0		0	0	0	0	0	0	0	0	0	0	0	0.005506	0	0	0
	Otu01247	Bacteroidetes(100)	Bacteroidia(100)	Bacteroidales(100)	unclassified(100)	unclassified(100)		0	0	0	0	0	0	0	0	0	0	0	1	0	0	0		0	0	0	0	0	0	0	0	0	0	0	0.005506	0	0	0
	Otu01248	Bacteroidetes(100)	Bacteroidia(100)	Bacteroidales(100)	Bacteroidaceae(100)	Bacteroides(100)		0	0	0	0	0	0	0	0	0	0	0	1	0	0	0		0	0	0	0	0	0	0	0	0	0	0	0.005506	0	0	0
	Otu01249	Bacteroidetes(100)	Bacteroidia(100)	Bacteroidales(100)	Bacteroidaceae(100)	Bacteroides(100)		0	0	0	0	0	0	0	0	0	0	1	0	0	0	0		0	0	0	0	0	0	0	0	0	0	0.00643459	0	0	0	0
	Otu01250	Bacteroidetes(100)	Bacteroidia(100)	Bacteroidales(100)	Bacteroidaceae(100)	Bacteroides(100)		0	0	0	0	0	0	0	0	0	0	0	1	0	0	0		0	0	0	0	0	0	0	0	0	0	0	0.005506	0	0	0
	Otu01252	Bacteroidetes(100)	Bacteroidia(100)	Bacteroidales(100)	Bacteroidaceae(100)	Bacteroides(100)		0	0	0	0	0	0	0	0	0	1	0	0	0	0	0		0	0	0	0	0	0	0	0	0	0.00285861	0	0	0	0	0
	Otu01253	Bacteroidetes(100)	Bacteroidia(100)	Bacteroidales(100)	Bacteroidaceae(100)	Bacteroides(100)		0	0	0	0	0	0	0	0	0	1	0	0	0	0	0		0	0	0	0	0	0	0	0	0	0.00285861	0	0	0	0	0
	Otu01255	Bacteroidetes(100)	Bacteroidia(100)	Bacteroidales(100)	Bacteroidaceae(100)	Bacteroides(100)		0	0	0	0	0	0	0	0	0	1	0	0	0	0	0		0	0	0	0	0	0	0	0	0	0.00285861	0	0	0	0	0
	Otu01256	Bacteroidetes(100)	Bacteroidia(100)	Bacteroidales(100)	Bacteroidaceae(100)	Bacteroides(100)		0	0	0	0	0	0	0	0	0	0	0	1	0	0	0		0	0	0	0	0	0	0	0	0	0	0	0.005506	0	0	0
	Otu01257	Bacteroidetes(100)	Bacteroidia(100)	Bacteroidales(100)	Bacteroidaceae(100)	Bacteroides(100)		0	0	0	0	0	0	1	0	0	0	0	0	0	0	0		0	0	0	0	0	0	0.00508776	0	0	0	0	0	0	0	0
	Otu01258	Bacteroidetes(100)	Bacteroidia(100)	Bacteroidales(100)	Bacteroidaceae(100)	Bacteroides(100)		0	0	0	0	0	0	0	0	0	0	0	1	0	0	0		0	0	0	0	0	0	0	0	0	0	0	0.005506	0	0	0
	Otu01259	Bacteroidetes(100)	Bacteroidia(100)	Bacteroidales(100)	Bacteroidaceae(100)	Bacteroides(100)		0	0	0	0	0	0	0	0	0	0	0	1	0	0	0		0	0	0	0	0	0	0	0	0	0	0	0.005506	0	0	0
	Otu01261	Bacteroidetes(100)	Bacteroidia(100)	Bacteroidales(100)	Bacteroidaceae(100)	Bacteroides(100)		0	0	0	0	0	0	0	0	0	1	0	0	0	0	0		0	0	0	0	0	0	0	0	0	0.00285861	0	0	0	0	0
	Otu01262	Bacteroidetes(100)	Bacteroidia(100)	Bacteroidales(100)	Bacteroidaceae(100)	Bacteroides(100)		0	0	0	0	0	0	0	0	0	0	0	1	0	0	0		0	0	0	0	0	0	0	0	0	0	0	0.005506	0	0	0
	Otu01264	Bacteroidetes(100)	Bacteroidia(100)	Bacteroidales(100)	Bacteroidaceae(100)	Bacteroides(100)		0	0	0	0	0	0	0	0	0	1	0	0	0	0	0		0	0	0	0	0	0	0	0	0	0.00285861	0	0	0	0	0
	Otu01265	Bacteroidetes(100)	Bacteroidia(100)	Bacteroidales(100)	unclassified(100)	unclassified(100)		0	0	0	0	0	0	0	0	0	0	0	1	0	0	0		0	0	0	0	0	0	0	0	0	0	0	0.005506	0	0	0
	Otu01266	Bacteroidetes(100)	Bacteroidia(100)	Bacteroidales(100)	Bacteroidaceae(100)	Bacteroides(100)		0	0	0	0	0	0	0	0	0	0	0	1	0	0	0		0	0	0	0	0	0	0	0	0	0	0	0.005506	0	0	0
	Otu01267	Bacteroidetes(100)	Bacteroidia(100)	Bacteroidales(100)	Bacteroidaceae(100)	Bacteroides(100)		0	0	0	0	0	0	0	0	1	0	0	0	0	0	0		0	0	0	0	0	0	0	0	0.00687285	0	0	0	0	0	0
	Otu01270	Bacteroidetes(100)	Bacteroidia(100)	Bacteroidales(100)	unclassified(100)	unclassified(100)		0	0	0	0	0	0	0	0	0	0	0	1	0	0	0		0	0	0	0	0	0	0	0	0	0	0	0.005506	0	0	0
	Otu01271	Bacteroidetes(100)	Bacteroidia(100)	Bacteroidales(100)	Bacteroidaceae(100)	Bacteroides(100)		0	0	0	0	0	0	0	0	0	0	1	0	0	0	0		0	0	0	0	0	0	0	0	0	0	0.00643459	0	0	0	0
	Otu01272	Bacteroidetes(100)	Bacteroidia(100)	Bacteroidales(100)	Bacteroidaceae(100)	Bacteroides(100)		0	0	0	0	0	0	0	0	0	1	0	0	0	0	0		0	0	0	0	0	0	0	0	0	0.00285861	0	0	0	0	0
	Otu01273	Bacteroidetes(100)	Bacteroidia(100)	Bacteroidales(100)	Bacteroidaceae(100)	Bacteroides(100)		0	0	0	0	0	0	1	0	0	0	0	0	0	0	0		0	0	0	0	0	0	0.00508776	0	0	0	0	0	0	0	0
	Otu01276	Bacteroidetes(100)	Bacteroidia(100)	Bacteroidales(100)	Bacteroidaceae(100)	Bacteroides(100)		0	0	0	0	0	0	0	0	0	1	0	0	0	0	0		0	0	0	0	0	0	0	0	0	0.00285861	0	0	0	0	0
	Otu01277	Bacteroidetes(100)	Bacteroidia(100)	Bacteroidales(100)	Bacteroidaceae(100)	Bacteroides(100)		0	0	0	0	0	0	0	0	0	0	0	1	0	0	0		0	0	0	0	0	0	0	0	0	0	0	0.005506	0	0	0
	Otu01278	Bacteroidetes(100)	Bacteroidia(100)	Bacteroidales(100)	Bacteroidaceae(100)	Bacteroides(100)		0	0	0	0	0	0	0	0	0	1	0	0	0	0	0		0	0	0	0	0	0	0	0	0	0.00285861	0	0	0	0	0
	Otu01280	Bacteroidetes(100)	Bacteroidia(100)	Bacteroidales(100)	Porphyromonadaceae(100)	Dysgonomonas(100)		0	0	0	0	0	0	1	0	0	0	0	0	0	0	0		0	0	0	0	0	0	0.00508776	0	0	0	0	0	0	0	0
	Otu01281	Bacteroidetes(100)	Bacteroidia(100)	Bacteroidales(100)	Bacteroidaceae(100)	Bacteroides(100)		0	0	0	0	0	0	0	0	1	0	0	0	0	0	0		0	0	0	0	0	0	0	0	0.00687285	0	0	0	0	0	0
	Otu01282	Bacteroidetes(100)	Bacteroidia(100)	Bacteroidales(100)	Bacteroidaceae(100)	Bacteroides(100)		0	0	0	0	0	0	0	0	0	1	0	0	0	0	0		0	0	0	0	0	0	0	0	0	0.00285861	0	0	0	0	0
	Otu01283	Bacteroidetes(100)	Bacteroidia(100)	Bacteroidales(100)	Bacteroidaceae(100)	Bacteroides(100)		0	0	0	0	0	0	0	0	0	0	0	1	0	0	0		0	0	0	0	0	0	0	0	0	0	0	0.005506	0	0	0
	Otu01284	Bacteroidetes(100)	Bacteroidia(100)	Bacteroidales(100)	Bacteroidaceae(100)	Bacteroides(100)		0	0	0	0	0	0	0	0	0	0	0	1	0	0	0		0	0	0	0	0	0	0	0	0	0	0	0.005506	0	0	0
	Otu01285	Bacteroidetes(100)	Bacteroidia(100)	Bacteroidales(100)	Bacteroidaceae(100)	Bacteroides(100)		0	0	0	0	0	0	0	0	0	1	0	0	0	0	0		0	0	0	0	0	0	0	0	0	0.00285861	0	0	0	0	0
	Otu01286	Bacteroidetes(100)	Bacteroidia(100)	Bacteroidales(100)	Bacteroidaceae(100)	Bacteroides(100)		0	0	0	0	0	0	0	0	0	1	0	0	0	0	0		0	0	0	0	0	0	0	0	0	0.00285861	0	0	0	0	0
	Otu01287	Bacteroidetes(100)	Bacteroidia(100)	Bacteroidales(100)	Bacteroidaceae(100)	Bacteroides(100)		0	0	0	0	0	0	0	0	0	1	0	0	0	0	0		0	0	0	0	0	0	0	0	0	0.00285861	0	0	0	0	0
	Otu01288	Bacteroidetes(100)	Bacteroidia(100)	Bacteroidales(100)	Bacteroidaceae(100)	Bacteroides(100)		0	0	0	0	0	0	0	0	0	0	0	1	0	0	0		0	0	0	0	0	0	0	0	0	0	0	0.005506	0	0	0
	Otu01289	Bacteroidetes(100)	Bacteroidia(100)	Bacteroidales(100)	Porphyromonadaceae(100)	Parabacteroides(100)		0	0	0	0	0	0	0	0	0	1	0	0	0	0	0		0	0	0	0	0	0	0	0	0	0.00285861	0	0	0	0	0
	Otu01291	Bacteroidetes(100)	Bacteroidia(100)	Bacteroidales(100)	unclassified(100)	unclassified(100)		0	0	0	0	0	0	0	0	0	1	0	0	0	0	0		0	0	0	0	0	0	0	0	0	0.00285861	0	0	0	0	0
	Otu01292	Bacteroidetes(100)	Bacteroidia(100)	Bacteroidales(100)	Porphyromonadaceae(100)	Parabacteroides(100)		0	0	0	0	0	0	0	0	0	0	0	1	0	0	0		0	0	0	0	0	0	0	0	0	0	0	0.005506	0	0	0
	Otu01293	Bacteroidetes(100)	Bacteroidia(100)	Bacteroidales(100)	unclassified(100)	unclassified(100)		0	0	0	0	0	0	0	0	0	1	0	0	0	0	0		0	0	0	0	0	0	0	0	0	0.00285861	0	0	0	0	0
	Otu01294	Bacteroidetes(100)	Bacteroidia(100)	Bacteroidales(100)	Bacteroidaceae(100)	Bacteroides(100)		0	0	0	0	0	0	0	0	0	0	0	1	0	0	0		0	0	0	0	0	0	0	0	0	0	0	0.005506	0	0	0
	Otu01295	Bacteroidetes(100)	Bacteroidia(100)	Bacteroidales(100)	Bacteroidaceae(100)	Bacteroides(100)		0	0	0	0	0	0	1	0	0	0	0	0	0	0	0		0	0	0	0	0	0	0.00508776	0	0	0	0	0	0	0	0
	Otu01297	Bacteroidetes(100)	Bacteroidia(100)	Bacteroidales(100)	Bacteroidaceae(100)	Bacteroides(100)		0	0	0	0	0	0	1	0	0	0	0	0	0	0	0		0	0	0	0	0	0	0.00508776	0	0	0	0	0	0	0	0
	Otu01298	Bacteroidetes(100)	Bacteroidia(100)	Bacteroidales(100)	unclassified(100)	unclassified(100)		0	0	0	0	0	0	0	0	0	0	0	1	0	0	0		0	0	0	0	0	0	0	0	0	0	0	0.005506	0	0	0
	Otu01299	Bacteroidetes(100)	Bacteroidia(100)	Bacteroidales(100)	Bacteroidaceae(100)	Bacteroides(100)		0	0	0	0	0	0	0	0	0	0	0	1	0	0	0		0	0	0	0	0	0	0	0	0	0	0	0.005506	0	0	0
	Otu01300	Bacteroidetes(100)	Bacteroidia(100)	Bacteroidales(100)	Bacteroidaceae(100)	Bacteroides(100)		0	0	0	0	0	0	0	0	0	0	0	1	0	0	0		0	0	0	0	0	0	0	0	0	0	0	0.005506	0	0	0
	Otu01303	Bacteroidetes(100)	Bacteroidia(100)	Bacteroidales(100)	Porphyromonadaceae(100)	Parabacteroides(100)		0	0	0	0	0	0	0	0	0	0	0	1	0	0	0		0	0	0	0	0	0	0	0	0	0	0	0.005506	0	0	0
	Otu01305	Bacteroidetes(100)	Bacteroidia(100)	Bacteroidales(100)	Bacteroidaceae(100)	Bacteroides(100)		0	0	0	0	0	0	1	0	0	0	0	0	0	0	0		0	0	0	0	0	0	0.00508776	0	0	0	0	0	0	0	0
	Otu01307	Bacteroidetes(100)	Bacteroidia(100)	Bacteroidales(100)	Bacteroidaceae(100)	Bacteroides(100)		0	0	0	0	0	0	0	0	0	0	0	1	0	0	0		0	0	0	0	0	0	0	0	0	0	0	0.005506	0	0	0
	Otu01310	Bacteroidetes(100)	Bacteroidia(100)	Bacteroidales(100)	unclassified(100)	unclassified(100)		0	0	0	0	0	0	0	0	0	0	0	1	0	0	0		0	0	0	0	0	0	0	0	0	0	0	0.005506	0	0	0
	Otu01311	Bacteroidetes(100)	Bacteroidia(100)	Bacteroidales(100)	Bacteroidaceae(100)	Bacteroides(100)		0	0	0	0	0	0	0	0	0	1	0	0	0	0	0		0	0	0	0	0	0	0	0	0	0.00285861	0	0	0	0	0
	Otu01312	Bacteroidetes(100)	Bacteroidia(100)	Bacteroidales(100)	Bacteroidaceae(100)	Bacteroides(100)		0	0	0	0	0	0	0	0	0	0	0	1	0	0	0		0	0	0	0	0	0	0	0	0	0	0	0.005506	0	0	0
	Otu01314	Bacteroidetes(100)	Bacteroidia(100)	Bacteroidales(100)	Bacteroidaceae(100)	Bacteroides(100)		0	0	0	0	0	0	0	0	1	0	0	0	0	0	0		0	0	0	0	0	0	0	0	0.00687285	0	0	0	0	0	0
	Otu01316	Bacteroidetes(100)	Bacteroidia(100)	Bacteroidales(100)	Bacteroidaceae(100)	Bacteroides(100)		0	0	0	0	0	0	0	0	0	0	0	1	0	0	0		0	0	0	0	0	0	0	0	0	0	0	0.005506	0	0	0
	Otu01317	Bacteroidetes(100)	Bacteroidia(100)	Bacteroidales(100)	unclassified(100)	unclassified(100)		0	0	0	0	0	0	0	0	0	1	0	0	0	0	0		0	0	0	0	0	0	0	0	0	0.00285861	0	0	0	0	0
	Otu01319	Bacteroidetes(100)	Bacteroidia(100)	Bacteroidales(100)	Bacteroidaceae(100)	Bacteroides(100)		0	0	0	0	0	0	1	0	0	0	0	0	0	0	0		0	0	0	0	0	0	0.00508776	0	0	0	0	0	0	0	0
	Otu01320	Bacteroidetes(100)	Bacteroidia(100)	Bacteroidales(100)	Bacteroidaceae(100)	Bacteroides(100)		0	0	0	0	0	0	1	0	0	0	0	0	0	0	0		0	0	0	0	0	0	0.00508776	0	0	0	0	0	0	0	0
	Otu01323	Bacteroidetes(100)	Bacteroidia(100)	Bacteroidales(100)	Bacteroidaceae(100)	Bacteroides(100)		0	0	0	0	0	0	0	1	0	0	0	0	0	0	0		0	0	0	0	0	0	0	0.0169924	0	0	0	0	0	0	0
	Otu01324	Bacteroidetes(100)	Bacteroidia(100)	Bacteroidales(100)	Bacteroidaceae(100)	Bacteroides(100)		0	0	0	0	0	0	0	0	0	1	0	0	0	0	0		0	0	0	0	0	0	0	0	0	0.00285861	0	0	0	0	0
	Otu01342	Actinobacteria(100)	Actinobacteria(100)	Actinomycetales(100)	Actinomycetaceae(100)	Actinomyces(100)		0	0	0	0	0	0	0	0	0	0	1	0	0	0	0		0	0	0	0	0	0	0	0	0	0	0.00643459	0	0	0	0
	Otu01358	Proteobacteria(100)	Gammaproteobacteria(100)	Pasteurellales(100)	Pasteurellaceae(100)	unclassified(100)		0	0	0	0	0	0	0	0	0	1	0	0	0	0	0		0	0	0	0	0	0	0	0	0	0.00285861	0	0	0	0	0
	Otu01361	Proteobacteria(100)	Gammaproteobacteria(100)	Pasteurellales(100)	Pasteurellaceae(100)	unclassified(100)		0	0	0	0	0	0	0	0	0	1	0	0	0	0	0		0	0	0	0	0	0	0	0	0	0.00285861	0	0	0	0	0
	Otu01362	Proteobacteria(100)	Gammaproteobacteria(100)	Pasteurellales(100)	Pasteurellaceae(100)	unclassified(100)		0	0	0	0	0	0	0	0	0	1	0	0	0	0	0		0	0	0	0	0	0	0	0	0	0.00285861	0	0	0	0	0
	Otu01363	Proteobacteria(100)	Gammaproteobacteria(100)	Pasteurellales(100)	Pasteurellaceae(100)	unclassified(100)		0	0	0	0	0	0	0	1	0	0	0	0	0	0	0		0	0	0	0	0	0	0	0.0169924	0	0	0	0	0	0	0
	Otu01364	Proteobacteria(100)	Gammaproteobacteria(100)	Pasteurellales(100)	Pasteurellaceae(100)	unclassified(100)		0	0	0	0	0	0	0	0	0	1	0	0	0	0	0		0	0	0	0	0	0	0	0	0	0.00285861	0	0	0	0	0
	Otu01365	Proteobacteria(100)	Gammaproteobacteria(100)	Pasteurellales(100)	Pasteurellaceae(100)	unclassified(100)		0	0	0	0	0	0	0	0	0	1	0	0	0	0	0		0	0	0	0	0	0	0	0	0	0.00285861	0	0	0	0	0
	Otu01366	Proteobacteria(100)	Gammaproteobacteria(100)	Pasteurellales(100)	Pasteurellaceae(100)	unclassified(100)		0	0	0	0	0	0	0	0	0	1	0	0	0	0	0		0	0	0	0	0	0	0	0	0	0.00285861	0	0	0	0	0
	Otu01367	Proteobacteria(100)	Gammaproteobacteria(100)	Pasteurellales(100)	Pasteurellaceae(100)	unclassified(100)		0	0	0	0	0	0	1	0	0	0	0	0	0	0	0		0	0	0	0	0	0	0.00508776	0	0	0	0	0	0	0	0
	Otu01368	Proteobacteria(100)	Gammaproteobacteria(100)	Pasteurellales(100)	Pasteurellaceae(100)	unclassified(100)		0	0	0	0	0	0	0	0	0	1	0	0	0	0	0		0	0	0	0	0	0	0	0	0	0.00285861	0	0	0	0	0
	Otu01370	Proteobacteria(100)	Gammaproteobacteria(100)	Pasteurellales(100)	Pasteurellaceae(100)	Aggregatibacter(100)		0	0	0	0	0	0	1	0	0	0	0	0	0	0	0		0	0	0	0	0	0	0.00508776	0	0	0	0	0	0	0	0
	Otu01371	Proteobacteria(100)	Gammaproteobacteria(100)	Pasteurellales(100)	Pasteurellaceae(100)	unclassified(100)		0	0	0	0	0	0	0	0	0	0	0	1	0	0	0		0	0	0	0	0	0	0	0	0	0	0	0.005506	0	0	0
	Otu01372	Proteobacteria(100)	Gammaproteobacteria(100)	Pasteurellales(100)	Pasteurellaceae(100)	unclassified(100)		0	0	0	0	0	0	0	0	0	1	0	0	0	0	0		0	0	0	0	0	0	0	0	0	0.00285861	0	0	0	0	0
	Otu01373	Proteobacteria(100)	Gammaproteobacteria(100)	Pasteurellales(100)	Pasteurellaceae(100)	unclassified(100)		0	0	0	0	0	0	0	0	0	0	1	0	0	0	0		0	0	0	0	0	0	0	0	0	0	0.00643459	0	0	0	0
	Otu01377	Proteobacteria(100)	Gammaproteobacteria(100)	Pasteurellales(100)	Pasteurellaceae(100)	unclassified(100)		0	0	0	0	0	0	0	0	1	0	0	0	0	0	0		0	0	0	0	0	0	0	0	0.00687285	0	0	0	0	0	0
	Otu01378	Proteobacteria(100)	Gammaproteobacteria(100)	Pasteurellales(100)	Pasteurellaceae(100)	unclassified(100)		0	0	0	0	0	0	0	0	0	0	1	0	0	0	0		0	0	0	0	0	0	0	0	0	0	0.00643459	0	0	0	0
	Otu01383	Proteobacteria(100)	Gammaproteobacteria(100)	Pasteurellales(100)	Pasteurellaceae(100)	unclassified(100)		0	0	0	0	0	0	0	0	0	0	1	0	0	0	0		0	0	0	0	0	0	0	0	0	0	0.00643459	0	0	0	0
	Otu01385	Fusobacteria(100)	Fusobacteriia(100)	Fusobacteriales(100)	Fusobacteriaceae(100)	unclassified(100)		0	0	0	0	0	0	0	0	0	1	0	0	0	0	0		0	0	0	0	0	0	0	0	0	0.00285861	0	0	0	0	0
	Otu01387	Synergistetes(100)	Synergistia(100)	Synergistales(100)	Synergistaceae(100)	Anaerobaculum(100)		0	0	0	0	0	0	0	0	0	0	0	1	0	0	0		0	0	0	0	0	0	0	0	0	0	0	0.005506	0	0	0
	Otu01389	Actinobacteria(100)	Actinobacteria(100)	Actinomycetales(100)	Corynebacteriaceae(100)	Corynebacterium(100)		0	0	0	0	0	0	0	0	0	0	1	0	0	0	0		0	0	0	0	0	0	0	0	0	0	0.00643459	0	0	0	0
	Otu01416	Firmicutes(100)	Erysipelotrichia(100)	Erysipelotrichales(100)	Erysipelotrichaceae(100)	Turicibacter(100)		0	0	0	0	0	0	1	0	0	0	0	0	0	0	0		0	0	0	0	0	0	0.00508776	0	0	0	0	0	0	0	0
	Otu01439	Bacteroidetes(100)	Bacteroidia(100)	Bacteroidales(100)	Porphyromonadaceae(100)	Parabacteroides(100)		0	0	0	0	0	0	0	0	0	0	1	0	0	0	0		0	0	0	0	0	0	0	0	0	0	0.00643459	0	0	0	0
	Otu01449	Planctomycetes(100)	Planctomycetia(100)	Planctomycetales(100)	Planctomycetaceae(100)	unclassified(100)		0	0	0	0	0	0	0	0	0	1	0	0	0	0	0		0	0	0	0	0	0	0	0	0	0.00285861	0	0	0	0	0
	Otu01458	Proteobacteria(100)	Gammaproteobacteria(100)	Enterobacteriales(100)	Enterobacteriaceae(100)	unclassified(100)		0	0	0	0	0	0	0	0	0	1	0	0	0	0	0		0	0	0	0	0	0	0	0	0	0.00285861	0	0	0	0	0
	Otu01459	Proteobacteria(100)	Gammaproteobacteria(100)	Enterobacteriales(100)	Enterobacteriaceae(100)	Escherichia/Shigella(100)		0	0	0	0	0	0	0	0	0	1	0	0	0	0	0		0	0	0	0	0	0	0	0	0	0.00285861	0	0	0	0	0
	Otu01461	Proteobacteria(100)	Gammaproteobacteria(100)	Enterobacteriales(100)	Enterobacteriaceae(100)	unclassified(100)		0	0	0	0	0	0	0	0	0	1	0	0	0	0	0		0	0	0	0	0	0	0	0	0	0.00285861	0	0	0	0	0
	Otu01466	Proteobacteria(100)	Gammaproteobacteria(100)	Enterobacteriales(100)	Enterobacteriaceae(100)	unclassified(100)		0	0	0	0	0	0	0	0	0	0	0	1	0	0	0		0	0	0	0	0	0	0	0	0	0	0	0.005506	0	0	0
	Otu01468	Proteobacteria(100)	Gammaproteobacteria(100)	Enterobacteriales(100)	Enterobacteriaceae(100)	unclassified(100)		0	0	0	0	0	0	0	0	0	1	0	0	0	0	0		0	0	0	0	0	0	0	0	0	0.00285861	0	0	0	0	0
	Otu01469	Proteobacteria(100)	Gammaproteobacteria(100)	Enterobacteriales(100)	Enterobacteriaceae(100)	Obesumbacterium(100)		0	0	0	0	0	0	0	0	0	0	0	1	0	0	0		0	0	0	0	0	0	0	0	0	0	0	0.005506	0	0	0
	Otu01470	Proteobacteria(100)	Gammaproteobacteria(100)	Enterobacteriales(100)	Enterobacteriaceae(100)	unclassified(100)		0	0	0	0	0	0	0	0	0	0	0	1	0	0	0		0	0	0	0	0	0	0	0	0	0	0	0.005506	0	0	0
	Otu01472	Proteobacteria(100)	Gammaproteobacteria(100)	Enterobacteriales(100)	Enterobacteriaceae(100)	Escherichia/Shigella(100)		0	0	0	0	0	0	0	0	0	1	0	0	0	0	0		0	0	0	0	0	0	0	0	0	0.00285861	0	0	0	0	0
	Otu01476	Proteobacteria(100)	Gammaproteobacteria(100)	Enterobacteriales(100)	Enterobacteriaceae(100)	Escherichia/Shigella(100)		0	0	0	0	0	0	0	0	0	1	0	0	0	0	0		0	0	0	0	0	0	0	0	0	0.00285861	0	0	0	0	0
	Otu01477	Proteobacteria(100)	Gammaproteobacteria(100)	Enterobacteriales(100)	Enterobacteriaceae(100)	Escherichia/Shigella(100)		0	0	0	0	0	0	0	0	0	0	0	1	0	0	0		0	0	0	0	0	0	0	0	0	0	0	0.005506	0	0	0
	Otu01479	Proteobacteria(100)	Gammaproteobacteria(100)	Enterobacteriales(100)	Enterobacteriaceae(100)	unclassified(100)		0	0	0	0	0	0	0	0	0	1	0	0	0	0	0		0	0	0	0	0	0	0	0	0	0.00285861	0	0	0	0	0
	Otu01481	Proteobacteria(100)	Gammaproteobacteria(100)	Enterobacteriales(100)	Enterobacteriaceae(100)	unclassified(100)		0	0	0	0	0	0	0	0	0	1	0	0	0	0	0		0	0	0	0	0	0	0	0	0	0.00285861	0	0	0	0	0
	Otu01482	Proteobacteria(100)	Gammaproteobacteria(100)	Enterobacteriales(100)	Enterobacteriaceae(100)	unclassified(100)		0	0	0	0	0	0	1	0	0	0	0	0	0	0	0		0	0	0	0	0	0	0.00508776	0	0	0	0	0	0	0	0
	Otu01484	Proteobacteria(100)	Gammaproteobacteria(100)	Enterobacteriales(100)	Enterobacteriaceae(100)	Escherichia/Shigella(100)		0	0	0	0	0	0	0	0	0	1	0	0	0	0	0		0	0	0	0	0	0	0	0	0	0.00285861	0	0	0	0	0
	Otu01488	Proteobacteria(100)	Gammaproteobacteria(100)	Enterobacteriales(100)	Enterobacteriaceae(100)	Escherichia/Shigella(100)		0	0	0	0	0	0	1	0	0	0	0	0	0	0	0		0	0	0	0	0	0	0.00508776	0	0	0	0	0	0	0	0
	Otu01492	Proteobacteria(100)	Gammaproteobacteria(100)	Enterobacteriales(100)	Enterobacteriaceae(100)	unclassified(100)		0	0	0	0	0	0	1	0	0	0	0	0	0	0	0		0	0	0	0	0	0	0.00508776	0	0	0	0	0	0	0	0
	Otu01497	Proteobacteria(100)	Gammaproteobacteria(100)	Enterobacteriales(100)	Enterobacteriaceae(100)	unclassified(100)		0	0	0	0	0	0	0	0	0	0	0	1	0	0	0		0	0	0	0	0	0	0	0	0	0	0	0.005506	0	0	0
	Otu01501	Proteobacteria(100)	Gammaproteobacteria(100)	Enterobacteriales(100)	Enterobacteriaceae(100)	Escherichia/Shigella(100)		0	0	0	0	0	0	0	0	0	1	0	0	0	0	0		0	0	0	0	0	0	0	0	0	0.00285861	0	0	0	0	0
	Otu01514	Proteobacteria(100)	Gammaproteobacteria(100)	Enterobacteriales(100)	Enterobacteriaceae(100)	Morganella(100)		0	0	0	0	0	0	1	0	0	0	0	0	0	0	0		0	0	0	0	0	0	0.00508776	0	0	0	0	0	0	0	0
	Otu01520	Proteobacteria(100)	Gammaproteobacteria(100)	Enterobacteriales(100)	Enterobacteriaceae(100)	Escherichia/Shigella(100)		0	0	0	0	0	0	0	0	0	1	0	0	0	0	0		0	0	0	0	0	0	0	0	0	0.00285861	0	0	0	0	0
	Otu01523	Proteobacteria(100)	Gammaproteobacteria(100)	Enterobacteriales(100)	Enterobacteriaceae(100)	unclassified(100)		0	0	0	0	0	0	1	0	0	0	0	0	0	0	0		0	0	0	0	0	0	0.00508776	0	0	0	0	0	0	0	0
	Otu01525	Proteobacteria(100)	Gammaproteobacteria(100)	Enterobacteriales(100)	Enterobacteriaceae(100)	Morganella(100)		0	0	0	0	0	0	1	0	0	0	0	0	0	0	0		0	0	0	0	0	0	0.00508776	0	0	0	0	0	0	0	0
	Otu01527	Proteobacteria(100)	Gammaproteobacteria(100)	Enterobacteriales(100)	Enterobacteriaceae(100)	unclassified(100)		0	0	0	0	0	0	1	0	0	0	0	0	0	0	0		0	0	0	0	0	0	0.00508776	0	0	0	0	0	0	0	0
	Otu01536	Proteobacteria(100)	Gammaproteobacteria(100)	Enterobacteriales(100)	Enterobacteriaceae(100)	Escherichia/Shigella(100)		0	0	0	0	0	0	0	0	0	0	0	1	0	0	0		0	0	0	0	0	0	0	0	0	0	0	0.005506	0	0	0
	Otu01537	Proteobacteria(100)	Gammaproteobacteria(100)	Enterobacteriales(100)	Enterobacteriaceae(100)	Escherichia/Shigella(100)		0	0	0	0	0	0	0	0	1	0	0	0	0	0	0		0	0	0	0	0	0	0	0	0.00687285	0	0	0	0	0	0
	Otu01543	Proteobacteria(100)	Gammaproteobacteria(100)	Enterobacteriales(100)	Enterobacteriaceae(100)	Morganella(100)		0	0	0	0	0	0	0	0	0	1	0	0	0	0	0		0	0	0	0	0	0	0	0	0	0.00285861	0	0	0	0	0
	Otu01549	Proteobacteria(100)	Gammaproteobacteria(100)	Enterobacteriales(100)	Enterobacteriaceae(100)	Escherichia/Shigella(100)		0	0	0	0	0	0	0	0	1	0	0	0	0	0	0		0	0	0	0	0	0	0	0	0.00687285	0	0	0	0	0	0
	Otu01551	Proteobacteria(100)	Gammaproteobacteria(100)	Enterobacteriales(100)	Enterobacteriaceae(100)	unclassified(100)		0	0	0	0	0	0	0	0	1	0	0	0	0	0	0		0	0	0	0	0	0	0	0	0.00687285	0	0	0	0	0	0
	Otu01562	Proteobacteria(100)	Gammaproteobacteria(100)	Enterobacteriales(100)	Enterobacteriaceae(100)	unclassified(100)		0	0	0	0	0	0	0	0	1	0	0	0	0	0	0		0	0	0	0	0	0	0	0	0.00687285	0	0	0	0	0	0
	Otu01564	Proteobacteria(100)	Gammaproteobacteria(100)	Enterobacteriales(100)	Enterobacteriaceae(100)	Obesumbacterium(100)		0	0	0	0	0	0	0	0	0	0	0	1	0	0	0		0	0	0	0	0	0	0	0	0	0	0	0.005506	0	0	0
	Otu01577	Proteobacteria(100)	Gammaproteobacteria(100)	Enterobacteriales(100)	Enterobacteriaceae(100)	unclassified(100)		0	0	0	0	0	0	0	1	0	0	0	0	0	0	0		0	0	0	0	0	0	0	0.0169924	0	0	0	0	0	0	0
	Otu01578	Proteobacteria(100)	Gammaproteobacteria(100)	Enterobacteriales(100)	Enterobacteriaceae(100)	unclassified(100)		0	0	0	0	0	0	0	0	0	0	0	1	0	0	0		0	0	0	0	0	0	0	0	0	0	0	0.005506	0	0	0
	Otu01585	Proteobacteria(100)	Gammaproteobacteria(100)	Enterobacteriales(100)	Enterobacteriaceae(100)	unclassified(100)		0	0	0	0	0	0	0	1	0	0	0	0	0	0	0		0	0	0	0	0	0	0	0.0169924	0	0	0	0	0	0	0
	Otu01588	Proteobacteria(100)	Gammaproteobacteria(100)	Enterobacteriales(100)	Enterobacteriaceae(100)	Escherichia/Shigella(100)		0	0	0	0	0	0	0	0	0	1	0	0	0	0	0		0	0	0	0	0	0	0	0	0	0.00285861	0	0	0	0	0
	Otu01589	Proteobacteria(100)	Gammaproteobacteria(100)	Enterobacteriales(100)	Enterobacteriaceae(100)	Morganella(100)		0	0	0	0	0	0	0	1	0	0	0	0	0	0	0		0	0	0	0	0	0	0	0.0169924	0	0	0	0	0	0	0
	Otu01591	Proteobacteria(100)	Gammaproteobacteria(100)	Enterobacteriales(100)	Enterobacteriaceae(100)	unclassified(100)		0	0	0	0	0	0	1	0	0	0	0	0	0	0	0		0	0	0	0	0	0	0.00508776	0	0	0	0	0	0	0	0
	Otu01593	Proteobacteria(100)	Gammaproteobacteria(100)	Enterobacteriales(100)	Enterobacteriaceae(100)	unclassified(100)		0	0	0	0	0	0	0	0	1	0	0	0	0	0	0		0	0	0	0	0	0	0	0	0.00687285	0	0	0	0	0	0
	Otu01598	Proteobacteria(100)	Gammaproteobacteria(100)	Enterobacteriales(100)	Enterobacteriaceae(100)	unclassified(100)		0	0	0	0	0	0	0	0	0	0	0	1	0	0	0		0	0	0	0	0	0	0	0	0	0	0	0.005506	0	0	0
	Otu01601	Proteobacteria(100)	Gammaproteobacteria(100)	Enterobacteriales(100)	Enterobacteriaceae(100)	unclassified(100)		0	0	0	0	0	0	0	0	0	1	0	0	0	0	0		0	0	0	0	0	0	0	0	0	0.00285861	0	0	0	0	0
	Otu01603	Proteobacteria(100)	Gammaproteobacteria(100)	Enterobacteriales(100)	Enterobacteriaceae(100)	Escherichia/Shigella(100)		0	0	0	0	0	0	0	0	0	0	0	1	0	0	0		0	0	0	0	0	0	0	0	0	0	0	0.005506	0	0	0
	Otu01604	Proteobacteria(100)	Gammaproteobacteria(100)	Enterobacteriales(100)	Enterobacteriaceae(100)	Escherichia/Shigella(100)		0	0	0	0	0	0	0	0	0	0	0	1	0	0	0		0	0	0	0	0	0	0	0	0	0	0	0.005506	0	0	0
	Otu01605	Proteobacteria(100)	Gammaproteobacteria(100)	Enterobacteriales(100)	Enterobacteriaceae(100)	Escherichia/Shigella(100)		0	0	0	0	0	0	0	0	0	1	0	0	0	0	0		0	0	0	0	0	0	0	0	0	0.00285861	0	0	0	0	0
	Otu01606	Proteobacteria(100)	Gammaproteobacteria(100)	Enterobacteriales(100)	Enterobacteriaceae(100)	Morganella(100)		0	0	0	0	0	0	0	1	0	0	0	0	0	0	0		0	0	0	0	0	0	0	0.0169924	0	0	0	0	0	0	0
	Otu01607	Proteobacteria(100)	Gammaproteobacteria(100)	Enterobacteriales(100)	Enterobacteriaceae(100)	Morganella(100)		0	0	0	0	0	0	0	1	0	0	0	0	0	0	0		0	0	0	0	0	0	0	0.0169924	0	0	0	0	0	0	0
	Otu01609	Proteobacteria(100)	Gammaproteobacteria(100)	Enterobacteriales(100)	Enterobacteriaceae(100)	unclassified(100)		0	0	0	0	0	0	0	0	0	0	0	1	0	0	0		0	0	0	0	0	0	0	0	0	0	0	0.005506	0	0	0
	Otu01612	Firmicutes(100)	Negativicutes(100)	Selenomonadales(100)	Veillonellaceae(100)	Veillonella(100)		0	0	0	0	0	0	0	0	0	1	0	0	0	0	0		0	0	0	0	0	0	0	0	0	0.00285861	0	0	0	0	0
	Otu01617	Firmicutes(100)	Negativicutes(100)	Selenomonadales(100)	Veillonellaceae(100)	Veillonella(100)		0	0	0	0	0	0	1	0	0	0	0	0	0	0	0		0	0	0	0	0	0	0.00508776	0	0	0	0	0	0	0	0
	Otu01618	Firmicutes(100)	Negativicutes(100)	Selenomonadales(100)	Veillonellaceae(100)	Veillonella(100)		0	0	0	0	0	0	0	0	0	0	0	1	0	0	0		0	0	0	0	0	0	0	0	0	0	0	0.005506	0	0	0
	Otu01623	Firmicutes(100)	Negativicutes(100)	Selenomonadales(100)	Veillonellaceae(100)	Veillonella(100)		0	0	0	0	0	0	0	0	0	0	0	1	0	0	0		0	0	0	0	0	0	0	0	0	0	0	0.005506	0	0	0
	Otu01624	Firmicutes(100)	Negativicutes(100)	Selenomonadales(100)	Veillonellaceae(100)	Veillonella(100)		0	0	0	0	0	0	1	0	0	0	0	0	0	0	0		0	0	0	0	0	0	0.00508776	0	0	0	0	0	0	0	0
	Otu01628	Firmicutes(100)	Negativicutes(100)	Selenomonadales(100)	Veillonellaceae(100)	Veillonella(100)		0	0	0	0	0	0	0	0	0	0	1	0	0	0	0		0	0	0	0	0	0	0	0	0	0	0.00643459	0	0	0	0
	Otu01631	Firmicutes(100)	Negativicutes(100)	Selenomonadales(100)	Veillonellaceae(100)	Veillonella(100)		0	0	0	0	0	0	1	0	0	0	0	0	0	0	0		0	0	0	0	0	0	0.00508776	0	0	0	0	0	0	0	0
	Otu01632	Firmicutes(100)	Negativicutes(100)	Selenomonadales(100)	Veillonellaceae(100)	Veillonella(100)		0	0	0	0	0	0	0	0	0	1	0	0	0	0	0		0	0	0	0	0	0	0	0	0	0.00285861	0	0	0	0	0
	Otu01634	Firmicutes(100)	Negativicutes(100)	Selenomonadales(100)	Veillonellaceae(100)	Veillonella(100)		0	0	0	0	0	0	0	0	0	1	0	0	0	0	0		0	0	0	0	0	0	0	0	0	0.00285861	0	0	0	0	0
	Otu01635	Firmicutes(100)	Negativicutes(100)	Selenomonadales(100)	Veillonellaceae(100)	Veillonella(100)		0	0	0	0	0	0	1	0	0	0	0	0	0	0	0		0	0	0	0	0	0	0.00508776	0	0	0	0	0	0	0	0
	Otu01636	Firmicutes(100)	Negativicutes(100)	Selenomonadales(100)	Veillonellaceae(100)	Veillonella(100)		0	0	0	0	0	0	1	0	0	0	0	0	0	0	0		0	0	0	0	0	0	0.00508776	0	0	0	0	0	0	0	0
	Otu01637	Firmicutes(100)	Negativicutes(100)	Selenomonadales(100)	Veillonellaceae(100)	Veillonella(100)		0	0	0	0	0	0	1	0	0	0	0	0	0	0	0		0	0	0	0	0	0	0.00508776	0	0	0	0	0	0	0	0
	Otu01639	Firmicutes(100)	Negativicutes(100)	Selenomonadales(100)	Veillonellaceae(100)	Veillonella(100)		0	0	0	0	0	0	0	0	0	1	0	0	0	0	0		0	0	0	0	0	0	0	0	0	0.00285861	0	0	0	0	0
	Otu01641	Firmicutes(100)	Negativicutes(100)	Selenomonadales(100)	Veillonellaceae(100)	unclassified(100)		0	0	0	0	0	0	0	0	0	0	1	0	0	0	0		0	0	0	0	0	0	0	0	0	0	0.00643459	0	0	0	0
	Otu01642	Firmicutes(100)	Negativicutes(100)	Selenomonadales(100)	Veillonellaceae(100)	Veillonella(100)		0	0	0	0	0	0	1	0	0	0	0	0	0	0	0		0	0	0	0	0	0	0.00508776	0	0	0	0	0	0	0	0
	Otu01643	Firmicutes(100)	Negativicutes(100)	Selenomonadales(100)	Veillonellaceae(100)	Veillonella(100)		0	0	0	0	0	0	1	0	0	0	0	0	0	0	0		0	0	0	0	0	0	0.00508776	0	0	0	0	0	0	0	0
	Otu01645	Firmicutes(100)	Negativicutes(100)	Selenomonadales(100)	Veillonellaceae(100)	Veillonella(100)		0	0	0	0	0	0	0	0	0	0	1	0	0	0	0		0	0	0	0	0	0	0	0	0	0	0.00643459	0	0	0	0
	Otu01647	Firmicutes(100)	Negativicutes(100)	Selenomonadales(100)	Veillonellaceae(100)	Veillonella(100)		0	0	0	0	0	0	0	0	0	0	1	0	0	0	0		0	0	0	0	0	0	0	0	0	0	0.00643459	0	0	0	0
	Otu01648	Firmicutes(100)	Negativicutes(100)	Selenomonadales(100)	Veillonellaceae(100)	Veillonella(100)		0	0	0	0	0	0	1	0	0	0	0	0	0	0	0		0	0	0	0	0	0	0.00508776	0	0	0	0	0	0	0	0
	Otu01649	Firmicutes(100)	Negativicutes(100)	Selenomonadales(100)	Veillonellaceae(100)	Veillonella(100)		0	0	0	0	0	0	1	0	0	0	0	0	0	0	0		0	0	0	0	0	0	0.00508776	0	0	0	0	0	0	0	0
	Otu01650	Firmicutes(100)	Negativicutes(100)	Selenomonadales(100)	Veillonellaceae(100)	unclassified(100)		0	0	0	0	0	0	1	0	0	0	0	0	0	0	0		0	0	0	0	0	0	0.00508776	0	0	0	0	0	0	0	0
	Otu01651	Firmicutes(100)	Negativicutes(100)	Selenomonadales(100)	Veillonellaceae(100)	Veillonella(100)		0	0	0	0	0	0	0	0	0	1	0	0	0	0	0		0	0	0	0	0	0	0	0	0	0.00285861	0	0	0	0	0
	Otu01652	Firmicutes(100)	Negativicutes(100)	Selenomonadales(100)	Veillonellaceae(100)	Veillonella(100)		0	0	0	0	0	0	0	0	0	1	0	0	0	0	0		0	0	0	0	0	0	0	0	0	0.00285861	0	0	0	0	0
	Otu01655	Firmicutes(100)	Negativicutes(100)	Selenomonadales(100)	Veillonellaceae(100)	Veillonella(100)		0	0	0	0	0	0	0	1	0	0	0	0	0	0	0		0	0	0	0	0	0	0	0.0169924	0	0	0	0	0	0	0
	Otu01658	Firmicutes(100)	Negativicutes(100)	Selenomonadales(100)	Veillonellaceae(100)	Veillonella(100)		0	0	0	0	0	0	0	0	0	1	0	0	0	0	0		0	0	0	0	0	0	0	0	0	0.00285861	0	0	0	0	0
	Otu01659	Firmicutes(100)	Negativicutes(100)	Selenomonadales(100)	Veillonellaceae(100)	unclassified(100)		0	0	0	0	0	0	0	0	0	1	0	0	0	0	0		0	0	0	0	0	0	0	0	0	0.00285861	0	0	0	0	0
	Otu01661	Firmicutes(100)	Negativicutes(100)	Selenomonadales(100)	Veillonellaceae(100)	Veillonella(100)		0	0	0	0	0	0	1	0	0	0	0	0	0	0	0		0	0	0	0	0	0	0.00508776	0	0	0	0	0	0	0	0
	Otu01663	Firmicutes(100)	Negativicutes(100)	Selenomonadales(100)	Veillonellaceae(100)	Veillonella(100)		0	0	0	0	0	0	1	0	0	0	0	0	0	0	0		0	0	0	0	0	0	0.00508776	0	0	0	0	0	0	0	0
	Otu01664	Firmicutes(100)	Negativicutes(100)	Selenomonadales(100)	Veillonellaceae(100)	Veillonella(100)		0	0	0	0	0	0	0	0	0	1	0	0	0	0	0		0	0	0	0	0	0	0	0	0	0.00285861	0	0	0	0	0
	Otu01666	Firmicutes(100)	Negativicutes(100)	Selenomonadales(100)	Veillonellaceae(100)	Veillonella(100)		0	0	0	0	0	0	1	0	0	0	0	0	0	0	0		0	0	0	0	0	0	0.00508776	0	0	0	0	0	0	0	0
	Otu01667	Firmicutes(100)	Negativicutes(100)	Selenomonadales(100)	Veillonellaceae(100)	Veillonella(100)		0	0	0	0	0	0	0	0	0	1	0	0	0	0	0		0	0	0	0	0	0	0	0	0	0.00285861	0	0	0	0	0
	Otu01669	Firmicutes(100)	Negativicutes(100)	Selenomonadales(100)	Veillonellaceae(100)	Veillonella(100)		0	0	0	0	0	0	1	0	0	0	0	0	0	0	0		0	0	0	0	0	0	0.00508776	0	0	0	0	0	0	0	0
	Otu01670	Firmicutes(100)	Negativicutes(100)	Selenomonadales(100)	Veillonellaceae(100)	Veillonella(100)		0	0	0	0	0	0	0	1	0	0	0	0	0	0	0		0	0	0	0	0	0	0	0.0169924	0	0	0	0	0	0	0
	Otu01671	Firmicutes(100)	Negativicutes(100)	Selenomonadales(100)	Veillonellaceae(100)	Veillonella(100)		0	0	0	0	0	0	0	0	0	0	1	0	0	0	0		0	0	0	0	0	0	0	0	0	0	0.00643459	0	0	0	0
	Otu01672	Firmicutes(100)	Negativicutes(100)	Selenomonadales(100)	Veillonellaceae(100)	Veillonella(100)		0	0	0	0	0	0	0	0	0	0	0	1	0	0	0		0	0	0	0	0	0	0	0	0	0	0	0.005506	0	0	0
	Otu01674	Firmicutes(100)	Negativicutes(100)	Selenomonadales(100)	Veillonellaceae(100)	Veillonella(100)		0	0	0	0	0	0	0	0	0	0	1	0	0	0	0		0	0	0	0	0	0	0	0	0	0	0.00643459	0	0	0	0
	Otu01675	Firmicutes(100)	Negativicutes(100)	Selenomonadales(100)	Veillonellaceae(100)	Veillonella(100)		0	0	0	0	0	0	0	0	0	0	0	1	0	0	0		0	0	0	0	0	0	0	0	0	0	0	0.005506	0	0	0
	Otu01676	Firmicutes(100)	Negativicutes(100)	Selenomonadales(100)	Acidaminococcaceae(100)	Acidaminococcus(100)		0	0	0	0	0	0	0	0	0	0	1	0	0	0	0		0	0	0	0	0	0	0	0	0	0	0.00643459	0	0	0	0
	Otu01678	Firmicutes(100)	Negativicutes(100)	Selenomonadales(100)	Veillonellaceae(100)	Veillonella(100)		0	0	0	0	0	1	0	0	0	0	0	0	0	0	0		0	0	0	0	0	0.0121007	0	0	0	0	0	0	0	0	0
	Otu01679	Firmicutes(100)	Negativicutes(100)	Selenomonadales(100)	Veillonellaceae(100)	Veillonella(100)		0	0	0	0	0	0	1	0	0	0	0	0	0	0	0		0	0	0	0	0	0	0.00508776	0	0	0	0	0	0	0	0
	Otu01681	Firmicutes(100)	Negativicutes(100)	Selenomonadales(100)	Veillonellaceae(100)	Veillonella(100)		0	0	0	0	0	0	1	0	0	0	0	0	0	0	0		0	0	0	0	0	0	0.00508776	0	0	0	0	0	0	0	0
	Otu01682	Firmicutes(100)	Negativicutes(100)	Selenomonadales(100)	Veillonellaceae(100)	Veillonella(100)		0	0	0	0	0	0	0	1	0	0	0	0	0	0	0		0	0	0	0	0	0	0	0.0169924	0	0	0	0	0	0	0
	Otu01684	Firmicutes(100)	Negativicutes(100)	Selenomonadales(100)	Veillonellaceae(100)	unclassified(100)		0	0	0	0	0	0	0	0	0	1	0	0	0	0	0		0	0	0	0	0	0	0	0	0	0.00285861	0	0	0	0	0
	Otu01685	Firmicutes(100)	Negativicutes(100)	Selenomonadales(100)	Veillonellaceae(100)	Veillonella(100)		0	0	0	0	0	0	0	1	0	0	0	0	0	0	0		0	0	0	0	0	0	0	0.0169924	0	0	0	0	0	0	0
	Otu01686	Firmicutes(100)	Negativicutes(100)	Selenomonadales(100)	Veillonellaceae(100)	unclassified(100)		0	0	0	0	0	0	0	0	0	1	0	0	0	0	0		0	0	0	0	0	0	0	0	0	0.00285861	0	0	0	0	0
	Otu01690	Proteobacteria(100)	Gammaproteobacteria(100)	unclassified(100)	unclassified(100)	unclassified(100)		0	0	0	0	0	0	0	0	0	0	0	1	0	0	0		0	0	0	0	0	0	0	0	0	0	0	0.005506	0	0	0
	Otu01698	Firmicutes(100)	Negativicutes(100)	Selenomonadales(100)	Veillonellaceae(100)	Veillonella(100)		0	0	0	0	0	0	0	0	0	0	1	0	0	0	0		0	0	0	0	0	0	0	0	0	0	0.00643459	0	0	0	0
	Otu01703	Firmicutes(100)	Negativicutes(100)	Selenomonadales(100)	Veillonellaceae(100)	Veillonella(100)		0	0	0	0	0	0	1	0	0	0	0	0	0	0	0		0	0	0	0	0	0	0.00508776	0	0	0	0	0	0	0	0
	Otu01706	Firmicutes(100)	Negativicutes(100)	Selenomonadales(100)	Veillonellaceae(100)	Veillonella(100)		0	0	0	0	0	0	0	0	0	0	1	0	0	0	0		0	0	0	0	0	0	0	0	0	0	0.00643459	0	0	0	0
	Otu01708	Firmicutes(100)	Negativicutes(100)	Selenomonadales(100)	Acidaminococcaceae(100)	Acidaminococcus(100)		0	0	0	0	0	0	0	0	0	0	1	0	0	0	0		0	0	0	0	0	0	0	0	0	0	0.00643459	0	0	0	0
	Otu01709	Proteobacteria(100)	Gammaproteobacteria(100)	unclassified(100)	unclassified(100)	unclassified(100)		0	0	0	0	0	0	0	0	1	0	0	0	0	0	0		0	0	0	0	0	0	0	0	0.00687285	0	0	0	0	0	0
	Otu01710	Proteobacteria(100)	Gammaproteobacteria(100)	Enterobacteriales(100)	Enterobacteriaceae(100)	unclassified(100)		0	0	0	0	0	0	0	0	0	0	0	1	0	0	0		0	0	0	0	0	0	0	0	0	0	0	0.005506	0	0	0
	Otu01711	Proteobacteria(100)	Gammaproteobacteria(100)	Enterobacteriales(100)	Enterobacteriaceae(100)	unclassified(100)		0	0	0	0	0	0	1	0	0	0	0	0	0	0	0		0	0	0	0	0	0	0.00508776	0	0	0	0	0	0	0	0
	Otu01716	Proteobacteria(100)	Alphaproteobacteria(100)	unclassified(100)	unclassified(100)	unclassified(100)		0	0	0	0	0	0	0	0	0	1	0	0	0	0	0		0	0	0	0	0	0	0	0	0	0.00285861	0	0	0	0	0
	Otu01729	Firmicutes(100)	Negativicutes(100)	Selenomonadales(100)	Veillonellaceae(100)	Veillonella(100)		0	0	0	0	0	0	0	1	0	0	0	0	0	0	0		0	0	0	0	0	0	0	0.0169924	0	0	0	0	0	0	0
	Otu01732	Firmicutes(100)	Negativicutes(100)	Selenomonadales(100)	Veillonellaceae(100)	Veillonella(100)		0	0	0	0	0	0	1	0	0	0	0	0	0	0	0		0	0	0	0	0	0	0.00508776	0	0	0	0	0	0	0	0
	Otu01733	Firmicutes(100)	Negativicutes(100)	Selenomonadales(100)	Veillonellaceae(100)	Veillonella(100)		0	0	0	0	0	0	1	0	0	0	0	0	0	0	0		0	0	0	0	0	0	0.00508776	0	0	0	0	0	0	0	0
	Otu01736	Firmicutes(100)	Negativicutes(100)	Selenomonadales(100)	Veillonellaceae(100)	Veillonella(100)		0	0	0	0	0	0	1	0	0	0	0	0	0	0	0		0	0	0	0	0	0	0.00508776	0	0	0	0	0	0	0	0
	Otu01737	Firmicutes(100)	Negativicutes(100)	Selenomonadales(100)	Veillonellaceae(100)	Veillonella(100)		0	0	0	0	0	0	1	0	0	0	0	0	0	0	0		0	0	0	0	0	0	0.00508776	0	0	0	0	0	0	0	0
	Otu01738	Firmicutes(100)	Negativicutes(100)	Selenomonadales(100)	Veillonellaceae(100)	Veillonella(100)		0	0	0	0	0	0	0	1	0	0	0	0	0	0	0		0	0	0	0	0	0	0	0.0169924	0	0	0	0	0	0	0
	Otu01740	Firmicutes(100)	Negativicutes(100)	Selenomonadales(100)	Veillonellaceae(100)	Veillonella(100)		0	0	0	0	0	0	1	0	0	0	0	0	0	0	0		0	0	0	0	0	0	0.00508776	0	0	0	0	0	0	0	0
	Otu01742	Firmicutes(100)	Negativicutes(100)	Selenomonadales(100)	Veillonellaceae(100)	Veillonella(100)		0	0	0	0	0	1	0	0	0	0	0	0	0	0	0		0	0	0	0	0	0.0121007	0	0	0	0	0	0	0	0	0
	Otu01743	Firmicutes(100)	Negativicutes(100)	Selenomonadales(100)	Veillonellaceae(100)	Veillonella(100)		0	0	0	0	0	1	0	0	0	0	0	0	0	0	0		0	0	0	0	0	0.0121007	0	0	0	0	0	0	0	0	0
	Otu01751	Firmicutes(100)	Negativicutes(100)	Selenomonadales(100)	Veillonellaceae(100)	Veillonella(100)		0	0	0	0	0	0	1	0	0	0	0	0	0	0	0		0	0	0	0	0	0	0.00508776	0	0	0	0	0	0	0	0
	Otu01753	Firmicutes(100)	Negativicutes(100)	Selenomonadales(100)	Veillonellaceae(100)	Veillonella(100)		0	0	0	0	0	0	0	0	0	0	1	0	0	0	0		0	0	0	0	0	0	0	0	0	0	0.00643459	0	0	0	0
	Otu01754	Firmicutes(100)	Negativicutes(100)	Selenomonadales(100)	Veillonellaceae(100)	Veillonella(100)		0	0	0	0	0	0	0	0	0	0	1	0	0	0	0		0	0	0	0	0	0	0	0	0	0	0.00643459	0	0	0	0
	Otu01756	Firmicutes(100)	Negativicutes(100)	Selenomonadales(100)	Veillonellaceae(100)	Veillonella(100)		0	0	0	0	0	0	1	0	0	0	0	0	0	0	0		0	0	0	0	0	0	0.00508776	0	0	0	0	0	0	0	0
	Otu01759	Firmicutes(100)	Negativicutes(100)	Selenomonadales(100)	Veillonellaceae(100)	Veillonella(100)		0	0	0	0	0	0	1	0	0	0	0	0	0	0	0		0	0	0	0	0	0	0.00508776	0	0	0	0	0	0	0	0
	Otu01761	Firmicutes(100)	Negativicutes(100)	Selenomonadales(100)	Veillonellaceae(100)	Veillonella(100)		0	0	0	0	0	0	1	0	0	0	0	0	0	0	0		0	0	0	0	0	0	0.00508776	0	0	0	0	0	0	0	0
	Otu01762	Firmicutes(100)	Negativicutes(100)	Selenomonadales(100)	Veillonellaceae(100)	Veillonella(100)		0	0	0	0	0	0	1	0	0	0	0	0	0	0	0		0	0	0	0	0	0	0.00508776	0	0	0	0	0	0	0	0
	Otu01763	Firmicutes(100)	Negativicutes(100)	Selenomonadales(100)	Veillonellaceae(100)	Veillonella(100)		0	0	0	0	0	0	1	0	0	0	0	0	0	0	0		0	0	0	0	0	0	0.00508776	0	0	0	0	0	0	0	0
	Otu01764	Firmicutes(100)	Negativicutes(100)	Selenomonadales(100)	Veillonellaceae(100)	Veillonella(100)		0	0	0	0	0	0	1	0	0	0	0	0	0	0	0		0	0	0	0	0	0	0.00508776	0	0	0	0	0	0	0	0
	Otu01766	Proteobacteria(100)	Gammaproteobacteria(100)	Enterobacteriales(100)	Enterobacteriaceae(100)	Escherichia/Shigella(100)		0	0	0	0	0	0	0	0	0	1	0	0	0	0	0		0	0	0	0	0	0	0	0	0	0.00285861	0	0	0	0	0
	Otu01772	Proteobacteria(100)	Gammaproteobacteria(100)	Enterobacteriales(100)	Enterobacteriaceae(100)	Escherichia/Shigella(100)		0	0	0	0	0	0	0	0	0	0	1	0	0	0	0		0	0	0	0	0	0	0	0	0	0	0.00643459	0	0	0	0
	Otu01773	Proteobacteria(100)	Gammaproteobacteria(100)	Enterobacteriales(100)	Enterobacteriaceae(100)	Escherichia/Shigella(100)		0	0	0	0	0	0	0	0	0	0	1	0	0	0	0		0	0	0	0	0	0	0	0	0	0	0.00643459	0	0	0	0
	Otu01777	Proteobacteria(100)	Gammaproteobacteria(100)	Enterobacteriales(100)	Enterobacteriaceae(100)	unclassified(100)		0	0	0	0	0	0	0	0	0	1	0	0	0	0	0		0	0	0	0	0	0	0	0	0	0.00285861	0	0	0	0	0
	Otu01778	Proteobacteria(100)	Gammaproteobacteria(100)	Enterobacteriales(100)	Enterobacteriaceae(100)	Obesumbacterium(100)		0	0	0	0	0	0	0	0	0	0	1	0	0	0	0		0	0	0	0	0	0	0	0	0	0	0.00643459	0	0	0	0
	Otu01782	Proteobacteria(100)	Gammaproteobacteria(100)	Enterobacteriales(100)	Enterobacteriaceae(100)	Raoultella(100)		0	0	0	0	0	0	0	0	0	1	0	0	0	0	0		0	0	0	0	0	0	0	0	0	0.00285861	0	0	0	0	0
	Otu01786	Proteobacteria(100)	Gammaproteobacteria(100)	Enterobacteriales(100)	Enterobacteriaceae(100)	Escherichia/Shigella(100)		0	0	0	0	0	0	0	0	0	0	1	0	0	0	0		0	0	0	0	0	0	0	0	0	0	0.00643459	0	0	0	0
	Otu01790	Proteobacteria(100)	Gammaproteobacteria(100)	Enterobacteriales(100)	Enterobacteriaceae(100)	Escherichia/Shigella(100)		0	0	0	0	0	0	0	0	0	1	0	0	0	0	0		0	0	0	0	0	0	0	0	0	0.00285861	0	0	0	0	0
	Otu01795	Proteobacteria(100)	Gammaproteobacteria(100)	Enterobacteriales(100)	Enterobacteriaceae(100)	unclassified(100)		0	0	0	0	0	0	0	0	0	0	1	0	0	0	0		0	0	0	0	0	0	0	0	0	0	0.00643459	0	0	0	0
	Otu01798	Proteobacteria(100)	Gammaproteobacteria(100)	Enterobacteriales(100)	Enterobacteriaceae(100)	Escherichia/Shigella(100)		0	0	0	0	0	0	0	0	0	0	1	0	0	0	0		0	0	0	0	0	0	0	0	0	0	0.00643459	0	0	0	0
	Otu01811	Proteobacteria(100)	Gammaproteobacteria(100)	Enterobacteriales(100)	Enterobacteriaceae(100)	unclassified(100)		0	0	0	0	0	0	0	0	0	1	0	0	0	0	0		0	0	0	0	0	0	0	0	0	0.00285861	0	0	0	0	0
	Otu01838	Proteobacteria(100)	Gammaproteobacteria(100)	Enterobacteriales(100)	Enterobacteriaceae(100)	unclassified(100)		0	0	0	0	0	0	0	0	0	0	1	0	0	0	0		0	0	0	0	0	0	0	0	0	0	0.00643459	0	0	0	0
	Otu01841	Proteobacteria(100)	Gammaproteobacteria(100)	Enterobacteriales(100)	Enterobacteriaceae(100)	Escherichia/Shigella(100)		0	0	0	0	0	0	0	0	0	0	1	0	0	0	0		0	0	0	0	0	0	0	0	0	0	0.00643459	0	0	0	0
	Otu01851	Actinobacteria(100)	unclassified(100)	unclassified(100)	unclassified(100)	unclassified(100)		0	0	0	0	0	0	0	0	0	0	0	1	0	0	0		0	0	0	0	0	0	0	0	0	0	0	0.005506	0	0	0
	Otu01853	Actinobacteria(100)	unclassified(100)	unclassified(100)	unclassified(100)	unclassified(100)		0	0	0	0	0	0	0	0	0	1	0	0	0	0	0		0	0	0	0	0	0	0	0	0	0.00285861	0	0	0	0	0
	Otu01861	Proteobacteria(100)	Alphaproteobacteria(100)	Rhodospirillales(100)	Rhodospirillaceae(100)	unclassified(100)		0	0	0	0	0	0	1	0	0	0	0	0	0	0	0		0	0	0	0	0	0	0.00508776	0	0	0	0	0	0	0	0
	Otu01885	Proteobacteria(100)	Gammaproteobacteria(100)	Enterobacteriales(100)	Enterobacteriaceae(100)	unclassified(100)		0	0	0	0	0	0	0	0	0	0	0	1	0	0	0		0	0	0	0	0	0	0	0	0	0	0	0.005506	0	0	0
	Otu01888	Proteobacteria(100)	Gammaproteobacteria(100)	Enterobacteriales(100)	Enterobacteriaceae(100)	Escherichia/Shigella(100)		0	0	0	0	0	0	0	0	0	0	1	0	0	0	0		0	0	0	0	0	0	0	0	0	0	0.00643459	0	0	0	0
	Otu01892	Proteobacteria(100)	Gammaproteobacteria(100)	Enterobacteriales(100)	Enterobacteriaceae(100)	unclassified(100)		0	0	0	0	0	0	0	0	0	0	1	0	0	0	0		0	0	0	0	0	0	0	0	0	0	0.00643459	0	0	0	0
	Otu01896	Proteobacteria(100)	Gammaproteobacteria(100)	Enterobacteriales(100)	Enterobacteriaceae(100)	unclassified(100)		0	0	0	0	0	0	0	0	0	0	1	0	0	0	0		0	0	0	0	0	0	0	0	0	0	0.00643459	0	0	0	0
	Otu01903	Proteobacteria(100)	Gammaproteobacteria(100)	Enterobacteriales(100)	Enterobacteriaceae(100)	Obesumbacterium(100)		0	0	0	0	0	0	0	0	0	0	1	0	0	0	0		0	0	0	0	0	0	0	0	0	0	0.00643459	0	0	0	0
	Otu01904	Proteobacteria(100)	Gammaproteobacteria(100)	Enterobacteriales(100)	Enterobacteriaceae(100)	unclassified(100)		0	0	0	0	0	0	0	0	0	0	1	0	0	0	0		0	0	0	0	0	0	0	0	0	0	0.00643459	0	0	0	0
	Otu01906	Proteobacteria(100)	Gammaproteobacteria(100)	Enterobacteriales(100)	Enterobacteriaceae(100)	Morganella(100)		0	0	0	0	0	0	0	0	0	1	0	0	0	0	0		0	0	0	0	0	0	0	0	0	0.00285861	0	0	0	0	0
	Otu01915	Proteobacteria(100)	Gammaproteobacteria(100)	Enterobacteriales(100)	Enterobacteriaceae(100)	unclassified(100)		0	0	0	0	0	0	0	0	0	0	1	0	0	0	0		0	0	0	0	0	0	0	0	0	0	0.00643459	0	0	0	0
	Otu01917	Proteobacteria(100)	Gammaproteobacteria(100)	Enterobacteriales(100)	Enterobacteriaceae(100)	Obesumbacterium(100)		0	0	0	0	0	0	0	0	0	0	1	0	0	0	0		0	0	0	0	0	0	0	0	0	0	0.00643459	0	0	0	0
	Otu01927	Proteobacteria(100)	Gammaproteobacteria(100)	Enterobacteriales(100)	Enterobacteriaceae(100)	unclassified(100)		0	0	0	0	0	1	0	0	0	0	0	0	0	0	0		0	0	0	0	0	0.0121007	0	0	0	0	0	0	0	0	0
	Otu01928	Proteobacteria(100)	Gammaproteobacteria(100)	Enterobacteriales(100)	Enterobacteriaceae(100)	Escherichia/Shigella(100)		0	0	0	0	0	1	0	0	0	0	0	0	0	0	0		0	0	0	0	0	0.0121007	0	0	0	0	0	0	0	0	0
	Otu01929	Proteobacteria(100)	Gammaproteobacteria(100)	Enterobacteriales(100)	Enterobacteriaceae(100)	unclassified(100)		0	0	0	0	0	1	0	0	0	0	0	0	0	0	0		0	0	0	0	0	0.0121007	0	0	0	0	0	0	0	0	0
	Otu01931	Proteobacteria(100)	Gammaproteobacteria(100)	Enterobacteriales(100)	Enterobacteriaceae(100)	Morganella(100)		0	0	0	0	0	0	0	0	0	1	0	0	0	0	0		0	0	0	0	0	0	0	0	0	0.00285861	0	0	0	0	0
	Otu01934	Proteobacteria(100)	Gammaproteobacteria(100)	Enterobacteriales(100)	Enterobacteriaceae(100)	Escherichia/Shigella(100)		0	0	0	0	0	1	0	0	0	0	0	0	0	0	0		0	0	0	0	0	0.0121007	0	0	0	0	0	0	0	0	0
	Otu01935	Proteobacteria(100)	Gammaproteobacteria(100)	Enterobacteriales(100)	Enterobacteriaceae(100)	Morganella(100)		0	0	0	0	0	0	0	0	0	0	1	0	0	0	0		0	0	0	0	0	0	0	0	0	0	0.00643459	0	0	0	0
	Otu01951	Proteobacteria(100)	Gammaproteobacteria(100)	Enterobacteriales(100)	Enterobacteriaceae(100)	Escherichia/Shigella(100)		0	0	0	0	0	0	0	0	0	1	0	0	0	0	0		0	0	0	0	0	0	0	0	0	0.00285861	0	0	0	0	0
	Otu01954	Proteobacteria(100)	Gammaproteobacteria(100)	Enterobacteriales(100)	Enterobacteriaceae(100)	unclassified(100)		0	0	0	0	0	0	0	0	0	0	1	0	0	0	0		0	0	0	0	0	0	0	0	0	0	0.00643459	0	0	0	0
	Otu01962	Proteobacteria(100)	Gammaproteobacteria(100)	Enterobacteriales(100)	Enterobacteriaceae(100)	unclassified(100)		0	0	0	1	0	0	0	0	0	0	0	0	0	0	0		0	0	0	0.0207641	0	0	0	0	0	0	0	0	0	0	0
	Otu01963	Proteobacteria(100)	Gammaproteobacteria(100)	Enterobacteriales(100)	Enterobacteriaceae(100)	unclassified(100)		0	0	0	0	0	0	0	0	0	0	0	1	0	0	0		0	0	0	0	0	0	0	0	0	0	0	0.005506	0	0	0
	Otu01970	Proteobacteria(100)	Gammaproteobacteria(100)	Enterobacteriales(100)	Enterobacteriaceae(100)	Escherichia/Shigella(100)		0	0	0	0	0	0	0	0	0	1	0	0	0	0	0		0	0	0	0	0	0	0	0	0	0.00285861	0	0	0	0	0
	Otu01971	Proteobacteria(100)	Gammaproteobacteria(100)	Enterobacteriales(100)	Enterobacteriaceae(100)	Obesumbacterium(100)		0	0	0	0	0	0	0	0	0	0	1	0	0	0	0		0	0	0	0	0	0	0	0	0	0	0.00643459	0	0	0	0
	Otu01972	Proteobacteria(100)	Gammaproteobacteria(100)	Enterobacteriales(100)	Enterobacteriaceae(100)	Escherichia/Shigella(100)		0	0	0	0	0	0	0	0	0	0	0	1	0	0	0		0	0	0	0	0	0	0	0	0	0	0	0.005506	0	0	0
	Otu01974	Proteobacteria(100)	Gammaproteobacteria(100)	Enterobacteriales(100)	Enterobacteriaceae(100)	Morganella(100)		0	0	0	0	0	0	0	0	0	1	0	0	0	0	0		0	0	0	0	0	0	0	0	0	0.00285861	0	0	0	0	0
	Otu01977	Proteobacteria(100)	Gammaproteobacteria(100)	Enterobacteriales(100)	Enterobacteriaceae(100)	Escherichia/Shigella(100)		0	0	0	0	0	0	0	1	0	0	0	0	0	0	0		0	0	0	0	0	0	0	0.0169924	0	0	0	0	0	0	0
	Otu01979	Proteobacteria(100)	Gammaproteobacteria(100)	Enterobacteriales(100)	Enterobacteriaceae(100)	Escherichia/Shigella(100)		0	0	0	0	0	0	0	0	0	1	0	0	0	0	0		0	0	0	0	0	0	0	0	0	0.00285861	0	0	0	0	0
	Otu01980	Proteobacteria(100)	Gammaproteobacteria(100)	Enterobacteriales(100)	Enterobacteriaceae(100)	Morganella(100)		0	0	0	0	0	0	0	0	1	0	0	0	0	0	0		0	0	0	0	0	0	0	0	0.00687285	0	0	0	0	0	0
	Otu01984	Proteobacteria(100)	Gammaproteobacteria(100)	Enterobacteriales(100)	Enterobacteriaceae(100)	Escherichia/Shigella(100)		0	0	0	0	0	1	0	0	0	0	0	0	0	0	0		0	0	0	0	0	0.0121007	0	0	0	0	0	0	0	0	0
	Otu01988	Proteobacteria(100)	Gammaproteobacteria(100)	Enterobacteriales(100)	Enterobacteriaceae(100)	Escherichia/Shigella(100)		0	0	0	0	1	0	0	0	0	0	0	0	0	0	0		0	0	0	0	0.0117647	0	0	0	0	0	0	0	0	0	0
	Otu01990	Proteobacteria(100)	Gammaproteobacteria(100)	Enterobacteriales(100)	Enterobacteriaceae(100)	Escherichia/Shigella(100)		0	0	0	0	0	1	0	0	0	0	0	0	0	0	0		0	0	0	0	0	0.0121007	0	0	0	0	0	0	0	0	0
	Otu01995	Proteobacteria(100)	Gammaproteobacteria(100)	Enterobacteriales(100)	Enterobacteriaceae(100)	unclassified(100)		0	0	0	0	0	0	0	0	0	1	0	0	0	0	0		0	0	0	0	0	0	0	0	0	0.00285861	0	0	0	0	0
	Otu01997	Proteobacteria(100)	Gammaproteobacteria(100)	Enterobacteriales(100)	Enterobacteriaceae(100)	unclassified(100)		0	0	0	0	0	0	0	0	0	0	1	0	0	0	0		0	0	0	0	0	0	0	0	0	0	0.00643459	0	0	0	0
	Otu01999	Proteobacteria(100)	Gammaproteobacteria(100)	Enterobacteriales(100)	Enterobacteriaceae(100)	unclassified(100)		0	0	0	0	0	0	0	0	0	1	0	0	0	0	0		0	0	0	0	0	0	0	0	0	0.00285861	0	0	0	0	0
	Otu02006	Proteobacteria(100)	Gammaproteobacteria(100)	Enterobacteriales(100)	Enterobacteriaceae(100)	unclassified(100)		0	0	0	0	0	0	0	0	0	0	1	0	0	0	0		0	0	0	0	0	0	0	0	0	0	0.00643459	0	0	0	0
	Otu02014	Proteobacteria(100)	Gammaproteobacteria(100)	Enterobacteriales(100)	Enterobacteriaceae(100)	Raoultella(100)		0	0	0	0	0	0	0	0	0	1	0	0	0	0	0		0	0	0	0	0	0	0	0	0	0.00285861	0	0	0	0	0
	Otu02016	Proteobacteria(100)	Gammaproteobacteria(100)	Enterobacteriales(100)	Enterobacteriaceae(100)	Morganella(100)		0	0	0	0	0	0	0	0	0	1	0	0	0	0	0		0	0	0	0	0	0	0	0	0	0.00285861	0	0	0	0	0
	Otu02032	Proteobacteria(100)	Gammaproteobacteria(100)	Enterobacteriales(100)	Enterobacteriaceae(100)	Escherichia/Shigella(100)		0	0	0	0	0	0	0	0	0	0	1	0	0	0	0		0	0	0	0	0	0	0	0	0	0	0.00643459	0	0	0	0
	Otu02034	Proteobacteria(100)	Gammaproteobacteria(100)	Enterobacteriales(100)	Enterobacteriaceae(100)	Escherichia/Shigella(100)		0	0	0	0	0	0	0	0	0	0	0	1	0	0	0		0	0	0	0	0	0	0	0	0	0	0	0.005506	0	0	0
	Otu02036	Proteobacteria(100)	Gammaproteobacteria(100)	Enterobacteriales(100)	Enterobacteriaceae(100)	Morganella(100)		0	0	0	0	0	0	0	0	0	1	0	0	0	0	0		0	0	0	0	0	0	0	0	0	0.00285861	0	0	0	0	0
	Otu02039	Proteobacteria(100)	Gammaproteobacteria(100)	Enterobacteriales(100)	Enterobacteriaceae(100)	unclassified(100)		0	0	0	0	0	0	0	0	0	1	0	0	0	0	0		0	0	0	0	0	0	0	0	0	0.00285861	0	0	0	0	0
	Otu02042	Proteobacteria(100)	Gammaproteobacteria(100)	Enterobacteriales(100)	Enterobacteriaceae(100)	unclassified(100)		0	0	0	0	0	0	0	0	0	0	1	0	0	0	0		0	0	0	0	0	0	0	0	0	0	0.00643459	0	0	0	0
	Otu02049	Proteobacteria(100)	Gammaproteobacteria(100)	Enterobacteriales(100)	Enterobacteriaceae(100)	unclassified(100)		0	0	0	0	0	0	0	0	0	0	1	0	0	0	0		0	0	0	0	0	0	0	0	0	0	0.00643459	0	0	0	0
	Otu02050	Proteobacteria(100)	Gammaproteobacteria(100)	Enterobacteriales(100)	Enterobacteriaceae(100)	unclassified(100)		0	0	0	0	0	0	0	0	0	0	1	0	0	0	0		0	0	0	0	0	0	0	0	0	0	0.00643459	0	0	0	0
	Otu02056	Proteobacteria(100)	Gammaproteobacteria(100)	Enterobacteriales(100)	Enterobacteriaceae(100)	Escherichia/Shigella(100)		0	0	0	0	0	0	0	0	0	0	0	1	0	0	0		0	0	0	0	0	0	0	0	0	0	0	0.005506	0	0	0
	Otu02072	Proteobacteria(100)	Gammaproteobacteria(100)	Enterobacteriales(100)	Enterobacteriaceae(100)	unclassified(100)		0	0	0	0	0	0	0	0	0	0	0	1	0	0	0		0	0	0	0	0	0	0	0	0	0	0	0.005506	0	0	0
	Otu02077	Firmicutes(100)	Bacilli(100)	Lactobacillales(100)	unclassified(100)	unclassified(100)		0	0	0	0	0	0	0	0	0	0	1	0	0	0	0		0	0	0	0	0	0	0	0	0	0	0.00643459	0	0	0	0
	Otu02081	Firmicutes(100)	Bacilli(100)	Lactobacillales(100)	Enterococcaceae(100)	Enterococcus(100)		0	0	0	0	1	0	0	0	0	0	0	0	0	0	0		0	0	0	0	0.0117647	0	0	0	0	0	0	0	0	0	0
	Otu02110	Firmicutes(100)	Bacilli(100)	Lactobacillales(100)	Streptococcaceae(100)	Streptococcus(100)		0	0	0	0	0	0	0	0	0	0	1	0	0	0	0		0	0	0	0	0	0	0	0	0	0	0.00643459	0	0	0	0
	Otu02120	Firmicutes(100)	Bacilli(100)	Lactobacillales(100)	unclassified(100)	unclassified(100)		0	0	0	0	0	0	0	1	0	0	0	0	0	0	0		0	0	0	0	0	0	0	0.0169924	0	0	0	0	0	0	0
	Otu02121	Firmicutes(100)	Bacilli(100)	Lactobacillales(100)	Streptococcaceae(100)	Streptococcus(100)		0	0	0	0	0	0	0	1	0	0	0	0	0	0	0		0	0	0	0	0	0	0	0.0169924	0	0	0	0	0	0	0
	Otu02128	Firmicutes(100)	Bacilli(100)	Lactobacillales(100)	Streptococcaceae(100)	Lactococcus(100)		0	0	0	0	0	1	0	0	0	0	0	0	0	0	0		0	0	0	0	0	0.0121007	0	0	0	0	0	0	0	0	0
	Otu02133	Firmicutes(100)	Bacilli(100)	Lactobacillales(100)	unclassified(100)	unclassified(100)		0	0	0	0	0	0	1	0	0	0	0	0	0	0	0		0	0	0	0	0	0	0.00508776	0	0	0	0	0	0	0	0
	Otu02154	Firmicutes(100)	Negativicutes(100)	Selenomonadales(100)	Veillonellaceae(100)	Veillonella(100)		0	0	0	0	0	0	0	0	1	0	0	0	0	0	0		0	0	0	0	0	0	0	0	0.00687285	0	0	0	0	0	0
	Otu02155	Firmicutes(100)	Negativicutes(100)	Selenomonadales(100)	Veillonellaceae(100)	Veillonella(100)		0	0	0	0	0	0	0	0	1	0	0	0	0	0	0		0	0	0	0	0	0	0	0	0.00687285	0	0	0	0	0	0
	Otu02157	Firmicutes(100)	Negativicutes(100)	Selenomonadales(100)	Veillonellaceae(100)	Veillonella(100)		0	0	0	0	0	0	0	0	0	1	0	0	0	0	0		0	0	0	0	0	0	0	0	0	0.00285861	0	0	0	0	0
	Otu02159	Firmicutes(100)	Negativicutes(100)	Selenomonadales(100)	Veillonellaceae(100)	Veillonella(100)		0	0	0	0	0	0	0	0	1	0	0	0	0	0	0		0	0	0	0	0	0	0	0	0.00687285	0	0	0	0	0	0
	Otu02162	Firmicutes(100)	Negativicutes(100)	Selenomonadales(100)	Veillonellaceae(100)	Veillonella(100)		0	0	0	0	0	0	0	0	1	0	0	0	0	0	0		0	0	0	0	0	0	0	0	0.00687285	0	0	0	0	0	0
	Otu02163	Firmicutes(100)	Negativicutes(100)	Selenomonadales(100)	Veillonellaceae(100)	Veillonella(100)		0	0	0	0	0	0	0	0	1	0	0	0	0	0	0		0	0	0	0	0	0	0	0	0.00687285	0	0	0	0	0	0
	Otu02165	Firmicutes(100)	Negativicutes(100)	Selenomonadales(100)	Veillonellaceae(100)	Veillonella(100)		0	0	0	1	0	0	0	0	0	0	0	0	0	0	0		0	0	0	0.0207641	0	0	0	0	0	0	0	0	0	0	0
	Otu02167	Firmicutes(100)	Negativicutes(100)	Selenomonadales(100)	Veillonellaceae(100)	Veillonella(100)		0	0	0	0	0	0	0	0	1	0	0	0	0	0	0		0	0	0	0	0	0	0	0	0.00687285	0	0	0	0	0	0
	Otu02168	Firmicutes(100)	Negativicutes(100)	Selenomonadales(100)	Veillonellaceae(100)	Veillonella(100)		0	0	0	0	0	0	0	0	1	0	0	0	0	0	0		0	0	0	0	0	0	0	0	0.00687285	0	0	0	0	0	0
	Otu02169	Firmicutes(100)	Negativicutes(100)	Selenomonadales(100)	Veillonellaceae(100)	Veillonella(100)		0	0	0	0	0	0	0	0	1	0	0	0	0	0	0		0	0	0	0	0	0	0	0	0.00687285	0	0	0	0	0	0
	Otu02172	Firmicutes(100)	Negativicutes(100)	Selenomonadales(100)	Veillonellaceae(100)	Veillonella(100)		0	0	0	0	0	0	0	0	1	0	0	0	0	0	0		0	0	0	0	0	0	0	0	0.00687285	0	0	0	0	0	0
	Otu02173	Firmicutes(100)	Negativicutes(100)	Selenomonadales(100)	Veillonellaceae(100)	Veillonella(100)		0	0	0	0	0	0	0	0	1	0	0	0	0	0	0		0	0	0	0	0	0	0	0	0.00687285	0	0	0	0	0	0
	Otu02175	Firmicutes(100)	Negativicutes(100)	Selenomonadales(100)	Veillonellaceae(100)	Veillonella(100)		0	0	0	0	0	0	0	0	0	0	1	0	0	0	0		0	0	0	0	0	0	0	0	0	0	0.00643459	0	0	0	0
	Otu02176	Firmicutes(100)	Negativicutes(100)	Selenomonadales(100)	Veillonellaceae(100)	Veillonella(100)		0	0	0	0	0	0	0	0	0	0	0	1	0	0	0		0	0	0	0	0	0	0	0	0	0	0	0.005506	0	0	0
	Otu02177	Firmicutes(100)	Negativicutes(100)	Selenomonadales(100)	Veillonellaceae(100)	Veillonella(100)		0	0	0	0	0	0	0	0	0	0	1	0	0	0	0		0	0	0	0	0	0	0	0	0	0	0.00643459	0	0	0	0
	Otu02179	Firmicutes(100)	Negativicutes(100)	Selenomonadales(100)	Veillonellaceae(100)	Veillonella(100)		0	0	0	0	0	0	0	0	0	0	0	1	0	0	0		0	0	0	0	0	0	0	0	0	0	0	0.005506	0	0	0
	Otu02181	Firmicutes(100)	Negativicutes(100)	Selenomonadales(100)	Veillonellaceae(100)	Veillonella(100)		0	0	0	0	0	0	1	0	0	0	0	0	0	0	0		0	0	0	0	0	0	0.00508776	0	0	0	0	0	0	0	0
	Otu02182	Firmicutes(100)	Negativicutes(100)	Selenomonadales(100)	Veillonellaceae(100)	Veillonella(100)		0	0	0	0	0	0	0	0	0	0	1	0	0	0	0		0	0	0	0	0	0	0	0	0	0	0.00643459	0	0	0	0
	Otu02185	Firmicutes(100)	Negativicutes(100)	Selenomonadales(100)	Veillonellaceae(100)	Veillonella(100)		0	0	0	1	0	0	0	0	0	0	0	0	0	0	0		0	0	0	0.0207641	0	0	0	0	0	0	0	0	0	0	0
	Otu02189	Firmicutes(100)	Negativicutes(100)	Selenomonadales(100)	Veillonellaceae(100)	Veillonella(100)		0	0	0	1	0	0	0	0	0	0	0	0	0	0	0		0	0	0	0.0207641	0	0	0	0	0	0	0	0	0	0	0
	Otu02192	Firmicutes(100)	Negativicutes(100)	Selenomonadales(100)	Veillonellaceae(100)	Veillonella(100)		0	0	0	0	0	0	0	0	1	0	0	0	0	0	0		0	0	0	0	0	0	0	0	0.00687285	0	0	0	0	0	0
	Otu02193	Firmicutes(100)	Negativicutes(100)	Selenomonadales(100)	Veillonellaceae(100)	Veillonella(100)		0	0	0	0	0	0	0	0	0	1	0	0	0	0	0		0	0	0	0	0	0	0	0	0	0.00285861	0	0	0	0	0
	Otu02199	Firmicutes(100)	Negativicutes(100)	Selenomonadales(100)	Veillonellaceae(100)	Veillonella(100)		0	0	0	1	0	0	0	0	0	0	0	0	0	0	0		0	0	0	0.0207641	0	0	0	0	0	0	0	0	0	0	0
	Otu02205	Firmicutes(100)	Negativicutes(100)	Selenomonadales(100)	Veillonellaceae(100)	Veillonella(100)		0	0	0	1	0	0	0	0	0	0	0	0	0	0	0		0	0	0	0.0207641	0	0	0	0	0	0	0	0	0	0	0
	Otu02214	Firmicutes(100)	Negativicutes(100)	Selenomonadales(100)	Veillonellaceae(100)	Veillonella(100)		0	0	0	0	0	0	0	0	1	0	0	0	0	0	0		0	0	0	0	0	0	0	0	0.00687285	0	0	0	0	0	0
	Otu02216	Firmicutes(100)	Negativicutes(100)	Selenomonadales(100)	Veillonellaceae(100)	Veillonella(100)		0	0	0	0	0	0	1	0	0	0	0	0	0	0	0		0	0	0	0	0	0	0.00508776	0	0	0	0	0	0	0	0
	Otu02219	Firmicutes(100)	Negativicutes(100)	Selenomonadales(100)	Veillonellaceae(100)	unclassified(100)		0	0	0	0	0	0	0	0	0	0	1	0	0	0	0		0	0	0	0	0	0	0	0	0	0	0.00643459	0	0	0	0
	Otu02222	Firmicutes(100)	Negativicutes(100)	Selenomonadales(100)	Veillonellaceae(100)	unclassified(100)		0	0	0	0	0	0	0	0	0	0	1	0	0	0	0		0	0	0	0	0	0	0	0	0	0	0.00643459	0	0	0	0
	Otu02223	Firmicutes(100)	Bacilli(100)	Lactobacillales(100)	Leuconostocaceae(100)	Leuconostoc(100)		0	0	0	0	0	0	1	0	0	0	0	0	0	0	0		0	0	0	0	0	0	0.00508776	0	0	0	0	0	0	0	0
	Otu02229	Firmicutes(100)	Negativicutes(100)	Selenomonadales(100)	Veillonellaceae(100)	Veillonella(100)		0	0	0	0	0	0	1	0	0	0	0	0	0	0	0		0	0	0	0	0	0	0.00508776	0	0	0	0	0	0	0	0
	Otu02230	Firmicutes(100)	Negativicutes(100)	Selenomonadales(100)	Veillonellaceae(100)	unclassified(100)		0	0	0	0	0	0	1	0	0	0	0	0	0	0	0		0	0	0	0	0	0	0.00508776	0	0	0	0	0	0	0	0
	Otu02312	Firmicutes(100)	Bacilli(100)	Lactobacillales(100)	Enterococcaceae(100)	unclassified(100)		0	0	0	1	0	0	0	0	0	0	0	0	0	0	0		0	0	0	0.0207641	0	0	0	0	0	0	0	0	0	0	0
	Otu02314	Firmicutes(100)	Bacilli(100)	Lactobacillales(100)	Leuconostocaceae(100)	Leuconostoc(100)		0	0	0	1	0	0	0	0	0	0	0	0	0	0	0		0	0	0	0.0207641	0	0	0	0	0	0	0	0	0	0	0
	Otu02317	Firmicutes(100)	Bacilli(100)	Lactobacillales(100)	Leuconostocaceae(100)	Leuconostoc(100)		0	0	0	0	0	0	0	0	0	0	0	1	0	0	0		0	0	0	0	0	0	0	0	0	0	0	0.005506	0	0	0
	Otu02318	Firmicutes(100)	Bacilli(100)	Lactobacillales(100)	unclassified(100)	unclassified(100)		0	0	0	0	1	0	0	0	0	0	0	0	0	0	0		0	0	0	0	0.0117647	0	0	0	0	0	0	0	0	0	0
	Otu02321	Firmicutes(100)	Bacilli(100)	Lactobacillales(100)	Enterococcaceae(100)	Enterococcus(100)		0	0	0	0	1	0	0	0	0	0	0	0	0	0	0		0	0	0	0	0.0117647	0	0	0	0	0	0	0	0	0	0
	Otu02325	Firmicutes(100)	Bacilli(100)	Lactobacillales(100)	Streptococcaceae(100)	Streptococcus(100)		0	0	0	0	0	0	0	0	0	0	0	1	0	0	0		0	0	0	0	0	0	0	0	0	0	0	0.005506	0	0	0
	Otu02326	Firmicutes(100)	Bacilli(100)	Lactobacillales(100)	Streptococcaceae(100)	Lactococcus(100)		0	0	0	0	1	0	0	0	0	0	0	0	0	0	0		0	0	0	0	0.0117647	0	0	0	0	0	0	0	0	0	0
	Otu02336	Firmicutes(100)	Bacilli(100)	Lactobacillales(100)	unclassified(100)	unclassified(100)		0	0	0	0	0	0	0	0	0	0	1	0	0	0	0		0	0	0	0	0	0	0	0	0	0	0.00643459	0	0	0	0
	Otu02338	Firmicutes(100)	Bacilli(100)	Lactobacillales(100)	Enterococcaceae(100)	Enterococcus(100)		0	0	0	0	1	0	0	0	0	0	0	0	0	0	0		0	0	0	0	0.0117647	0	0	0	0	0	0	0	0	0	0
	Otu02343	Firmicutes(100)	Bacilli(100)	Lactobacillales(100)	Streptococcaceae(100)	Streptococcus(100)		0	0	0	0	0	1	0	0	0	0	0	0	0	0	0		0	0	0	0	0	0.0121007	0	0	0	0	0	0	0	0	0
	Otu02347	Firmicutes(100)	Bacilli(100)	Lactobacillales(100)	Leuconostocaceae(100)	Leuconostoc(100)		0	0	0	0	0	0	1	0	0	0	0	0	0	0	0		0	0	0	0	0	0	0.00508776	0	0	0	0	0	0	0	0
	Otu02361	Firmicutes(100)	Bacilli(100)	Lactobacillales(100)	unclassified(100)	unclassified(100)		0	0	0	0	0	0	0	0	0	1	0	0	0	0	0		0	0	0	0	0	0	0	0	0	0.00285861	0	0	0	0	0
	Otu02362	Firmicutes(100)	Bacilli(100)	Lactobacillales(100)	Streptococcaceae(100)	Streptococcus(100)		0	0	0	0	0	0	0	0	0	1	0	0	0	0	0		0	0	0	0	0	0	0	0	0	0.00285861	0	0	0	0	0
	Otu02364	Firmicutes(100)	Bacilli(100)	Lactobacillales(100)	Streptococcaceae(100)	Streptococcus(100)		0	0	0	0	0	0	0	0	0	1	0	0	0	0	0		0	0	0	0	0	0	0	0	0	0.00285861	0	0	0	0	0
	Otu02371	Firmicutes(100)	Bacilli(100)	Lactobacillales(100)	Streptococcaceae(100)	Streptococcus(100)		0	0	0	0	0	0	0	0	0	0	0	1	0	0	0		0	0	0	0	0	0	0	0	0	0	0	0.005506	0	0	0
	Otu02375	Firmicutes(100)	Bacilli(100)	Lactobacillales(100)	Streptococcaceae(100)	Streptococcus(100)		0	0	0	0	0	0	0	0	0	0	1	0	0	0	0		0	0	0	0	0	0	0	0	0	0	0.00643459	0	0	0	0
	Otu02387	Firmicutes(100)	Negativicutes(100)	Selenomonadales(100)	Veillonellaceae(100)	Veillonella(100)		0	0	0	0	0	1	0	0	0	0	0	0	0	0	0		0	0	0	0	0	0.0121007	0	0	0	0	0	0	0	0	0
	Otu02390	Firmicutes(100)	Negativicutes(100)	Selenomonadales(100)	Veillonellaceae(100)	Veillonella(100)		0	0	0	0	1	0	0	0	0	0	0	0	0	0	0		0	0	0	0	0.0117647	0	0	0	0	0	0	0	0	0	0
	Otu02392	Firmicutes(100)	Negativicutes(100)	Selenomonadales(100)	Veillonellaceae(100)	unclassified(100)		0	0	0	0	0	1	0	0	0	0	0	0	0	0	0		0	0	0	0	0	0.0121007	0	0	0	0	0	0	0	0	0
	Otu02397	Firmicutes(100)	Negativicutes(100)	Selenomonadales(100)	Veillonellaceae(100)	Veillonella(100)		0	0	0	0	1	0	0	0	0	0	0	0	0	0	0		0	0	0	0	0.0117647	0	0	0	0	0	0	0	0	0	0
	Otu02402	Firmicutes(100)	Negativicutes(100)	Selenomonadales(100)	Veillonellaceae(100)	Veillonella(100)		0	0	0	0	0	1	0	0	0	0	0	0	0	0	0		0	0	0	0	0	0.0121007	0	0	0	0	0	0	0	0	0
	Otu02403	Firmicutes(100)	Negativicutes(100)	Selenomonadales(100)	Veillonellaceae(100)	Veillonella(100)		0	0	0	0	0	1	0	0	0	0	0	0	0	0	0		0	0	0	0	0	0.0121007	0	0	0	0	0	0	0	0	0
	Otu02404	Firmicutes(100)	Negativicutes(100)	Selenomonadales(100)	Veillonellaceae(100)	unclassified(100)		0	0	0	0	0	1	0	0	0	0	0	0	0	0	0		0	0	0	0	0	0.0121007	0	0	0	0	0	0	0	0	0
	Otu02409	Firmicutes(100)	Negativicutes(100)	Selenomonadales(100)	Veillonellaceae(100)	Veillonella(100)		0	0	0	0	1	0	0	0	0	0	0	0	0	0	0		0	0	0	0	0.0117647	0	0	0	0	0	0	0	0	0	0
	Otu02411	Firmicutes(100)	Negativicutes(100)	Selenomonadales(100)	Veillonellaceae(100)	Veillonella(100)		0	0	0	0	0	1	0	0	0	0	0	0	0	0	0		0	0	0	0	0	0.0121007	0	0	0	0	0	0	0	0	0
	Otu02414	Firmicutes(100)	Negativicutes(100)	Selenomonadales(100)	Veillonellaceae(100)	Veillonella(100)		0	0	0	0	0	1	0	0	0	0	0	0	0	0	0		0	0	0	0	0	0.0121007	0	0	0	0	0	0	0	0	0
	Otu02423	Firmicutes(100)	Negativicutes(100)	Selenomonadales(100)	Veillonellaceae(100)	unclassified(100)		0	0	0	0	1	0	0	0	0	0	0	0	0	0	0		0	0	0	0	0.0117647	0	0	0	0	0	0	0	0	0	0
	Otu02429	Firmicutes(100)	Negativicutes(100)	Selenomonadales(100)	Veillonellaceae(100)	Veillonella(100)		0	0	0	1	0	0	0	0	0	0	0	0	0	0	0		0	0	0	0.0207641	0	0	0	0	0	0	0	0	0	0	0
	Otu02430	Firmicutes(100)	Negativicutes(100)	Selenomonadales(100)	Veillonellaceae(100)	Veillonella(100)		0	0	0	1	0	0	0	0	0	0	0	0	0	0	0		0	0	0	0.0207641	0	0	0	0	0	0	0	0	0	0	0
	Otu02432	Firmicutes(100)	Negativicutes(100)	Selenomonadales(100)	Veillonellaceae(100)	Veillonella(100)		0	0	0	0	0	0	0	0	0	1	0	0	0	0	0		0	0	0	0	0	0	0	0	0	0.00285861	0	0	0	0	0
	Otu02438	Firmicutes(100)	Negativicutes(100)	Selenomonadales(100)	Veillonellaceae(100)	unclassified(100)		0	0	0	1	0	0	0	0	0	0	0	0	0	0	0		0	0	0	0.0207641	0	0	0	0	0	0	0	0	0	0	0
	Otu02440	Firmicutes(100)	Negativicutes(100)	Selenomonadales(100)	Veillonellaceae(100)	Veillonella(100)		0	0	0	0	0	0	0	0	1	0	0	0	0	0	0		0	0	0	0	0	0	0	0	0.00687285	0	0	0	0	0	0
	Otu02442	Firmicutes(100)	Negativicutes(100)	Selenomonadales(100)	Veillonellaceae(100)	unclassified(100)		0	0	0	0	0	0	0	0	1	0	0	0	0	0	0		0	0	0	0	0	0	0	0	0.00687285	0	0	0	0	0	0
	Otu02443	Firmicutes(100)	Negativicutes(100)	Selenomonadales(100)	Veillonellaceae(100)	unclassified(100)		0	0	0	0	0	0	0	0	1	0	0	0	0	0	0		0	0	0	0	0	0	0	0	0.00687285	0	0	0	0	0	0
	Otu02444	Firmicutes(100)	Negativicutes(100)	Selenomonadales(100)	Veillonellaceae(100)	Veillonella(100)		0	0	0	0	0	0	0	0	1	0	0	0	0	0	0		0	0	0	0	0	0	0	0	0.00687285	0	0	0	0	0	0
	Otu02445	Firmicutes(100)	Negativicutes(100)	Selenomonadales(100)	Veillonellaceae(100)	Veillonella(100)		0	0	0	0	0	0	0	0	0	1	0	0	0	0	0		0	0	0	0	0	0	0	0	0	0.00285861	0	0	0	0	0
	Otu02446	Firmicutes(100)	Negativicutes(100)	Selenomonadales(100)	Veillonellaceae(100)	Veillonella(100)		0	0	0	0	1	0	0	0	0	0	0	0	0	0	0		0	0	0	0	0.0117647	0	0	0	0	0	0	0	0	0	0
	Otu02450	Firmicutes(100)	Negativicutes(100)	Selenomonadales(100)	Veillonellaceae(100)	Veillonella(100)		0	0	0	0	0	1	0	0	0	0	0	0	0	0	0		0	0	0	0	0	0.0121007	0	0	0	0	0	0	0	0	0
	Otu02452	Firmicutes(100)	Negativicutes(100)	Selenomonadales(100)	Veillonellaceae(100)	Veillonella(100)		0	0	0	0	1	0	0	0	0	0	0	0	0	0	0		0	0	0	0	0.0117647	0	0	0	0	0	0	0	0	0	0
	Otu02453	Firmicutes(100)	Negativicutes(100)	Selenomonadales(100)	Veillonellaceae(100)	Veillonella(100)		0	0	0	0	0	1	0	0	0	0	0	0	0	0	0		0	0	0	0	0	0.0121007	0	0	0	0	0	0	0	0	0
	Otu02454	Firmicutes(100)	Negativicutes(100)	Selenomonadales(100)	Veillonellaceae(100)	Veillonella(100)		0	0	0	0	0	1	0	0	0	0	0	0	0	0	0		0	0	0	0	0	0.0121007	0	0	0	0	0	0	0	0	0
	Otu02456	Firmicutes(100)	Negativicutes(100)	Selenomonadales(100)	Veillonellaceae(100)	Veillonella(100)		0	0	0	0	0	1	0	0	0	0	0	0	0	0	0		0	0	0	0	0	0.0121007	0	0	0	0	0	0	0	0	0
	Otu02462	Firmicutes(100)	Negativicutes(100)	Selenomonadales(100)	Veillonellaceae(100)	Veillonella(100)		0	0	0	1	0	0	0	0	0	0	0	0	0	0	0		0	0	0	0.0207641	0	0	0	0	0	0	0	0	0	0	0
	Otu02466	Firmicutes(100)	Negativicutes(100)	Selenomonadales(100)	Veillonellaceae(100)	Veillonella(100)		0	0	0	0	1	0	0	0	0	0	0	0	0	0	0		0	0	0	0	0.0117647	0	0	0	0	0	0	0	0	0	0
	Otu02473	Firmicutes(100)	Negativicutes(100)	Selenomonadales(100)	Veillonellaceae(100)	Veillonella(100)		0	0	0	0	1	0	0	0	0	0	0	0	0	0	0		0	0	0	0	0.0117647	0	0	0	0	0	0	0	0	0	0
	Otu02474	Firmicutes(100)	Negativicutes(100)	Selenomonadales(100)	Veillonellaceae(100)	Veillonella(100)		0	0	0	0	0	1	0	0	0	0	0	0	0	0	0		0	0	0	0	0	0.0121007	0	0	0	0	0	0	0	0	0
	Otu02476	Firmicutes(100)	Negativicutes(100)	Selenomonadales(100)	Veillonellaceae(100)	Veillonella(100)		0	0	0	0	0	1	0	0	0	0	0	0	0	0	0		0	0	0	0	0	0.0121007	0	0	0	0	0	0	0	0	0
	Otu02478	Firmicutes(100)	Negativicutes(100)	Selenomonadales(100)	Veillonellaceae(100)	Veillonella(100)		0	0	0	0	0	1	0	0	0	0	0	0	0	0	0		0	0	0	0	0	0.0121007	0	0	0	0	0	0	0	0	0
	Otu02480	Firmicutes(100)	Negativicutes(100)	Selenomonadales(100)	Veillonellaceae(100)	Veillonella(100)		0	0	0	0	0	1	0	0	0	0	0	0	0	0	0		0	0	0	0	0	0.0121007	0	0	0	0	0	0	0	0	0
	Otu02484	Firmicutes(100)	Negativicutes(100)	Selenomonadales(100)	Veillonellaceae(100)	Veillonella(100)		0	0	0	0	0	1	0	0	0	0	0	0	0	0	0		0	0	0	0	0	0.0121007	0	0	0	0	0	0	0	0	0
	Otu02486	Firmicutes(100)	Negativicutes(100)	Selenomonadales(100)	Veillonellaceae(100)	Veillonella(100)		0	0	0	0	0	0	1	0	0	0	0	0	0	0	0		0	0	0	0	0	0	0.00508776	0	0	0	0	0	0	0	0
	Otu02489	Firmicutes(100)	Negativicutes(100)	Selenomonadales(100)	Veillonellaceae(100)	Veillonella(100)		0	0	0	0	1	0	0	0	0	0	0	0	0	0	0		0	0	0	0	0.0117647	0	0	0	0	0	0	0	0	0	0
	Otu02494	Firmicutes(100)	Negativicutes(100)	Selenomonadales(100)	Veillonellaceae(100)	Veillonella(100)		0	0	0	0	0	1	0	0	0	0	0	0	0	0	0		0	0	0	0	0	0.0121007	0	0	0	0	0	0	0	0	0
	Otu02495	Firmicutes(100)	Negativicutes(100)	Selenomonadales(100)	Veillonellaceae(100)	Veillonella(100)		0	0	0	0	0	1	0	0	0	0	0	0	0	0	0		0	0	0	0	0	0.0121007	0	0	0	0	0	0	0	0	0
	Otu02497	Firmicutes(100)	Negativicutes(100)	Selenomonadales(100)	Veillonellaceae(100)	Veillonella(100)		0	0	0	0	0	1	0	0	0	0	0	0	0	0	0		0	0	0	0	0	0.0121007	0	0	0	0	0	0	0	0	0
	Otu02499	Firmicutes(100)	Negativicutes(100)	Selenomonadales(100)	Veillonellaceae(100)	Veillonella(100)		0	0	0	0	0	1	0	0	0	0	0	0	0	0	0		0	0	0	0	0	0.0121007	0	0	0	0	0	0	0	0	0
	Otu02500	Firmicutes(100)	Negativicutes(100)	Selenomonadales(100)	Veillonellaceae(100)	Veillonella(100)		0	0	0	0	0	1	0	0	0	0	0	0	0	0	0		0	0	0	0	0	0.0121007	0	0	0	0	0	0	0	0	0
	Otu02505	Firmicutes(100)	Negativicutes(100)	Selenomonadales(100)	Veillonellaceae(100)	Veillonella(100)		0	0	0	0	0	0	0	0	0	1	0	0	0	0	0		0	0	0	0	0	0	0	0	0	0.00285861	0	0	0	0	0
	Otu02506	Firmicutes(100)	Negativicutes(100)	Selenomonadales(100)	Veillonellaceae(100)	Veillonella(100)		0	0	0	0	0	1	0	0	0	0	0	0	0	0	0		0	0	0	0	0	0.0121007	0	0	0	0	0	0	0	0	0
	Otu02507	Firmicutes(100)	Negativicutes(100)	Selenomonadales(100)	Veillonellaceae(100)	Veillonella(100)		0	0	0	0	0	1	0	0	0	0	0	0	0	0	0		0	0	0	0	0	0.0121007	0	0	0	0	0	0	0	0	0
	Otu02508	Firmicutes(100)	Negativicutes(100)	Selenomonadales(100)	Veillonellaceae(100)	Veillonella(100)		0	0	0	0	0	1	0	0	0	0	0	0	0	0	0		0	0	0	0	0	0.0121007	0	0	0	0	0	0	0	0	0
	Otu02512	Firmicutes(100)	Negativicutes(100)	Selenomonadales(100)	Veillonellaceae(100)	Veillonella(100)		0	0	0	0	0	1	0	0	0	0	0	0	0	0	0		0	0	0	0	0	0.0121007	0	0	0	0	0	0	0	0	0
	Otu02514	Firmicutes(100)	Negativicutes(100)	Selenomonadales(100)	Veillonellaceae(100)	Veillonella(100)		0	0	0	0	0	1	0	0	0	0	0	0	0	0	0		0	0	0	0	0	0.0121007	0	0	0	0	0	0	0	0	0
	Otu02515	Firmicutes(100)	Negativicutes(100)	Selenomonadales(100)	Veillonellaceae(100)	Veillonella(100)		0	0	0	0	0	1	0	0	0	0	0	0	0	0	0		0	0	0	0	0	0.0121007	0	0	0	0	0	0	0	0	0
	Otu02516	Firmicutes(100)	Negativicutes(100)	Selenomonadales(100)	Veillonellaceae(100)	Veillonella(100)		0	0	0	0	0	1	0	0	0	0	0	0	0	0	0		0	0	0	0	0	0.0121007	0	0	0	0	0	0	0	0	0
	Otu02517	Firmicutes(100)	Negativicutes(100)	Selenomonadales(100)	Veillonellaceae(100)	Veillonella(100)		0	0	0	0	0	1	0	0	0	0	0	0	0	0	0		0	0	0	0	0	0.0121007	0	0	0	0	0	0	0	0	0
	Otu02518	Firmicutes(100)	Negativicutes(100)	Selenomonadales(100)	Veillonellaceae(100)	Veillonella(100)		0	0	0	0	1	0	0	0	0	0	0	0	0	0	0		0	0	0	0	0.0117647	0	0	0	0	0	0	0	0	0	0
	Otu02520	Firmicutes(100)	Negativicutes(100)	Selenomonadales(100)	Veillonellaceae(100)	Veillonella(100)		0	0	0	0	0	0	0	0	0	1	0	0	0	0	0		0	0	0	0	0	0	0	0	0	0.00285861	0	0	0	0	0
	Otu02521	Firmicutes(100)	Negativicutes(100)	Selenomonadales(100)	Veillonellaceae(100)	Veillonella(100)		0	0	0	0	1	0	0	0	0	0	0	0	0	0	0		0	0	0	0	0.0117647	0	0	0	0	0	0	0	0	0	0
	Otu02522	Firmicutes(100)	Negativicutes(100)	Selenomonadales(100)	Veillonellaceae(100)	Veillonella(100)		0	0	0	0	0	1	0	0	0	0	0	0	0	0	0		0	0	0	0	0	0.0121007	0	0	0	0	0	0	0	0	0
	Otu02528	Firmicutes(100)	Negativicutes(100)	Selenomonadales(100)	Veillonellaceae(100)	Veillonella(100)		0	0	0	0	0	1	0	0	0	0	0	0	0	0	0		0	0	0	0	0	0.0121007	0	0	0	0	0	0	0	0	0
	Otu02530	Firmicutes(100)	Negativicutes(100)	Selenomonadales(100)	Veillonellaceae(100)	Veillonella(100)		0	0	0	0	0	1	0	0	0	0	0	0	0	0	0		0	0	0	0	0	0.0121007	0	0	0	0	0	0	0	0	0
	Otu02531	Firmicutes(100)	Negativicutes(100)	Selenomonadales(100)	Veillonellaceae(100)	Veillonella(100)		0	0	0	0	1	0	0	0	0	0	0	0	0	0	0		0	0	0	0	0.0117647	0	0	0	0	0	0	0	0	0	0
	Otu02534	Firmicutes(100)	Negativicutes(100)	Selenomonadales(100)	Veillonellaceae(100)	Veillonella(100)		0	0	0	0	0	1	0	0	0	0	0	0	0	0	0		0	0	0	0	0	0.0121007	0	0	0	0	0	0	0	0	0
	Otu02536	Firmicutes(100)	Negativicutes(100)	Selenomonadales(100)	Veillonellaceae(100)	Veillonella(100)		0	0	0	0	1	0	0	0	0	0	0	0	0	0	0		0	0	0	0	0.0117647	0	0	0	0	0	0	0	0	0	0
	Otu02544	Firmicutes(100)	Negativicutes(100)	Selenomonadales(100)	Veillonellaceae(100)	Veillonella(100)		0	0	0	0	0	0	0	0	1	0	0	0	0	0	0		0	0	0	0	0	0	0	0	0.00687285	0	0	0	0	0	0
	Otu02545	Firmicutes(100)	Negativicutes(100)	Selenomonadales(100)	Veillonellaceae(100)	Veillonella(100)		0	0	0	0	0	0	0	0	0	1	0	0	0	0	0		0	0	0	0	0	0	0	0	0	0.00285861	0	0	0	0	0
	Otu02546	Firmicutes(100)	Negativicutes(100)	Selenomonadales(100)	Veillonellaceae(100)	Veillonella(100)		0	0	0	0	0	0	1	0	0	0	0	0	0	0	0		0	0	0	0	0	0	0.00508776	0	0	0	0	0	0	0	0
	Otu02548	Firmicutes(100)	Negativicutes(100)	Selenomonadales(100)	Veillonellaceae(100)	Veillonella(100)		0	0	0	0	0	0	1	0	0	0	0	0	0	0	0		0	0	0	0	0	0	0.00508776	0	0	0	0	0	0	0	0
	Otu02549	Firmicutes(100)	Negativicutes(100)	Selenomonadales(100)	Veillonellaceae(100)	Veillonella(100)		0	0	0	0	0	0	1	0	0	0	0	0	0	0	0		0	0	0	0	0	0	0.00508776	0	0	0	0	0	0	0	0
	Otu02550	Firmicutes(100)	Negativicutes(100)	Selenomonadales(100)	Veillonellaceae(100)	Veillonella(100)		0	0	0	0	0	0	1	0	0	0	0	0	0	0	0		0	0	0	0	0	0	0.00508776	0	0	0	0	0	0	0	0
	Otu02552	Firmicutes(100)	Negativicutes(100)	Selenomonadales(100)	Veillonellaceae(100)	Veillonella(100)		0	0	0	0	0	0	0	0	1	0	0	0	0	0	0		0	0	0	0	0	0	0	0	0.00687285	0	0	0	0	0	0
	Otu02553	Firmicutes(100)	Negativicutes(100)	Selenomonadales(100)	Veillonellaceae(100)	Veillonella(100)		0	0	0	0	0	0	1	0	0	0	0	0	0	0	0		0	0	0	0	0	0	0.00508776	0	0	0	0	0	0	0	0
	Otu02556	Firmicutes(100)	Negativicutes(100)	Selenomonadales(100)	Veillonellaceae(100)	unclassified(100)		0	0	0	0	0	0	1	0	0	0	0	0	0	0	0		0	0	0	0	0	0	0.00508776	0	0	0	0	0	0	0	0
	Otu02562	Firmicutes(100)	Negativicutes(100)	Selenomonadales(100)	Veillonellaceae(100)	Veillonella(100)		0	0	0	0	0	0	0	1	0	0	0	0	0	0	0		0	0	0	0	0	0	0	0.0169924	0	0	0	0	0	0	0
	Otu02565	Firmicutes(100)	Negativicutes(100)	Selenomonadales(100)	Veillonellaceae(100)	Veillonella(100)		0	0	0	0	0	0	0	0	0	1	0	0	0	0	0		0	0	0	0	0	0	0	0	0	0.00285861	0	0	0	0	0
	Otu02568	Firmicutes(100)	Negativicutes(100)	Selenomonadales(100)	Veillonellaceae(100)	unclassified(100)		0	0	0	0	0	0	0	1	0	0	0	0	0	0	0		0	0	0	0	0	0	0	0.0169924	0	0	0	0	0	0	0
	Otu02569	Firmicutes(100)	Negativicutes(100)	Selenomonadales(100)	Veillonellaceae(100)	Veillonella(100)		0	0	0	0	0	0	0	0	1	0	0	0	0	0	0		0	0	0	0	0	0	0	0	0.00687285	0	0	0	0	0	0
	Otu02571	Firmicutes(100)	Negativicutes(100)	Selenomonadales(100)	Veillonellaceae(100)	Veillonella(100)		0	0	0	0	0	0	0	1	0	0	0	0	0	0	0		0	0	0	0	0	0	0	0.0169924	0	0	0	0	0	0	0
	Otu02572	Firmicutes(100)	Negativicutes(100)	Selenomonadales(100)	Veillonellaceae(100)	Veillonella(100)		0	0	0	0	0	0	1	0	0	0	0	0	0	0	0		0	0	0	0	0	0	0.00508776	0	0	0	0	0	0	0	0
	Otu02573	Firmicutes(100)	Negativicutes(100)	Selenomonadales(100)	Veillonellaceae(100)	unclassified(100)		0	0	0	0	0	0	0	1	0	0	0	0	0	0	0		0	0	0	0	0	0	0	0.0169924	0	0	0	0	0	0	0
	Otu02574	Firmicutes(100)	Negativicutes(100)	Selenomonadales(100)	Veillonellaceae(100)	Veillonella(100)		0	0	0	0	0	0	0	1	0	0	0	0	0	0	0		0	0	0	0	0	0	0	0.0169924	0	0	0	0	0	0	0
	Otu02576	Firmicutes(100)	Negativicutes(100)	Selenomonadales(100)	Veillonellaceae(100)	Veillonella(100)		0	0	0	0	0	0	0	1	0	0	0	0	0	0	0		0	0	0	0	0	0	0	0.0169924	0	0	0	0	0	0	0
	Otu02577	Firmicutes(100)	Negativicutes(100)	Selenomonadales(100)	Veillonellaceae(100)	Veillonella(100)		0	0	0	0	0	0	0	0	1	0	0	0	0	0	0		0	0	0	0	0	0	0	0	0.00687285	0	0	0	0	0	0
	Otu02578	Firmicutes(100)	Negativicutes(100)	Selenomonadales(100)	Veillonellaceae(100)	Veillonella(100)		0	0	0	0	0	0	0	1	0	0	0	0	0	0	0		0	0	0	0	0	0	0	0.0169924	0	0	0	0	0	0	0
	Otu02580	Firmicutes(100)	Negativicutes(100)	Selenomonadales(100)	Veillonellaceae(100)	Veillonella(100)		0	0	0	0	0	0	0	1	0	0	0	0	0	0	0		0	0	0	0	0	0	0	0.0169924	0	0	0	0	0	0	0
	Otu02581	Firmicutes(100)	Negativicutes(100)	Selenomonadales(100)	Veillonellaceae(100)	unclassified(100)		0	0	0	0	0	0	0	0	0	0	0	1	0	0	0		0	0	0	0	0	0	0	0	0	0	0	0.005506	0	0	0
	Otu02582	Firmicutes(100)	Negativicutes(100)	Selenomonadales(100)	Veillonellaceae(100)	Veillonella(100)		0	0	0	0	0	0	0	0	0	0	0	1	0	0	0		0	0	0	0	0	0	0	0	0	0	0	0.005506	0	0	0
	Otu02583	Firmicutes(100)	Negativicutes(100)	Selenomonadales(100)	Veillonellaceae(100)	Veillonella(100)		0	0	0	0	0	0	0	0	0	0	0	1	0	0	0		0	0	0	0	0	0	0	0	0	0	0	0.005506	0	0	0
	Otu02588	Firmicutes(100)	Negativicutes(100)	Selenomonadales(100)	Veillonellaceae(100)	Veillonella(100)		0	0	0	0	0	0	0	0	0	0	0	1	0	0	0		0	0	0	0	0	0	0	0	0	0	0	0.005506	0	0	0
	Otu02589	Firmicutes(100)	Negativicutes(100)	Selenomonadales(100)	Veillonellaceae(100)	unclassified(100)		0	0	0	0	0	0	0	0	0	0	0	1	0	0	0		0	0	0	0	0	0	0	0	0	0	0	0.005506	0	0	0
	Otu02590	Firmicutes(100)	Negativicutes(100)	Selenomonadales(100)	Veillonellaceae(100)	Veillonella(100)		0	0	0	0	0	0	0	0	0	0	0	1	0	0	0		0	0	0	0	0	0	0	0	0	0	0	0.005506	0	0	0
	Otu02592	Firmicutes(100)	Negativicutes(100)	Selenomonadales(100)	Veillonellaceae(100)	Veillonella(100)		0	0	0	0	0	0	0	0	0	0	0	1	0	0	0		0	0	0	0	0	0	0	0	0	0	0	0.005506	0	0	0
	Otu02593	Firmicutes(100)	Negativicutes(100)	Selenomonadales(100)	Veillonellaceae(100)	Veillonella(100)		0	0	0	0	0	0	0	0	0	0	0	1	0	0	0		0	0	0	0	0	0	0	0	0	0	0	0.005506	0	0	0
	Otu02594	Firmicutes(100)	Negativicutes(100)	Selenomonadales(100)	Veillonellaceae(100)	Veillonella(100)		0	0	0	0	0	0	1	0	0	0	0	0	0	0	0		0	0	0	0	0	0	0.00508776	0	0	0	0	0	0	0	0
	Otu02595	Firmicutes(100)	Negativicutes(100)	Selenomonadales(100)	Veillonellaceae(100)	Veillonella(100)		0	0	0	0	0	0	0	0	0	0	0	1	0	0	0		0	0	0	0	0	0	0	0	0	0	0	0.005506	0	0	0
	Otu02596	Firmicutes(100)	Negativicutes(100)	Selenomonadales(100)	Veillonellaceae(100)	Veillonella(100)		0	0	0	0	0	0	0	0	0	0	0	1	0	0	0		0	0	0	0	0	0	0	0	0	0	0	0.005506	0	0	0
	Otu02597	Firmicutes(100)	Negativicutes(100)	Selenomonadales(100)	Veillonellaceae(100)	Veillonella(100)		0	0	0	0	0	0	0	0	0	0	0	1	0	0	0		0	0	0	0	0	0	0	0	0	0	0	0.005506	0	0	0
	Otu02598	Firmicutes(100)	Negativicutes(100)	Selenomonadales(100)	Veillonellaceae(100)	unclassified(100)		0	0	0	0	0	0	0	0	0	0	0	1	0	0	0		0	0	0	0	0	0	0	0	0	0	0	0.005506	0	0	0
	Otu02599	Firmicutes(100)	Negativicutes(100)	Selenomonadales(100)	Veillonellaceae(100)	Veillonella(100)		0	0	0	0	0	0	0	0	0	0	0	1	0	0	0		0	0	0	0	0	0	0	0	0	0	0	0.005506	0	0	0
	Otu02600	Firmicutes(100)	Negativicutes(100)	Selenomonadales(100)	Veillonellaceae(100)	Veillonella(100)		0	0	0	0	0	0	0	0	0	0	0	1	0	0	0		0	0	0	0	0	0	0	0	0	0	0	0.005506	0	0	0
	Otu02605	Firmicutes(100)	Negativicutes(100)	Selenomonadales(100)	Veillonellaceae(100)	Veillonella(100)		0	0	0	0	0	0	1	0	0	0	0	0	0	0	0		0	0	0	0	0	0	0.00508776	0	0	0	0	0	0	0	0
	Otu02606	Firmicutes(100)	Negativicutes(100)	Selenomonadales(100)	Veillonellaceae(100)	Veillonella(100)		0	0	0	0	0	0	1	0	0	0	0	0	0	0	0		0	0	0	0	0	0	0.00508776	0	0	0	0	0	0	0	0
	Otu02609	Firmicutes(100)	Negativicutes(100)	Selenomonadales(100)	Veillonellaceae(100)	unclassified(100)		0	0	0	0	0	0	0	0	0	0	1	0	0	0	0		0	0	0	0	0	0	0	0	0	0	0.00643459	0	0	0	0
	Otu02610	Firmicutes(100)	Negativicutes(100)	Selenomonadales(100)	Veillonellaceae(100)	Veillonella(100)		0	0	0	0	0	0	1	0	0	0	0	0	0	0	0		0	0	0	0	0	0	0.00508776	0	0	0	0	0	0	0	0
	Otu02611	Firmicutes(100)	Negativicutes(100)	Selenomonadales(100)	Veillonellaceae(100)	Veillonella(100)		0	0	0	0	0	0	0	0	0	1	0	0	0	0	0		0	0	0	0	0	0	0	0	0	0.00285861	0	0	0	0	0
	Otu02613	Firmicutes(100)	Negativicutes(100)	Selenomonadales(100)	Veillonellaceae(100)	unclassified(100)		0	0	0	0	0	0	0	0	0	0	1	0	0	0	0		0	0	0	0	0	0	0	0	0	0	0.00643459	0	0	0	0
	Otu02615	Firmicutes(100)	Negativicutes(100)	Selenomonadales(100)	Veillonellaceae(100)	Veillonella(100)		0	0	0	0	0	0	1	0	0	0	0	0	0	0	0		0	0	0	0	0	0	0.00508776	0	0	0	0	0	0	0	0
	Otu02616	Firmicutes(100)	Negativicutes(100)	Selenomonadales(100)	Veillonellaceae(100)	Veillonella(100)		0	0	0	0	0	0	0	0	0	0	1	0	0	0	0		0	0	0	0	0	0	0	0	0	0	0.00643459	0	0	0	0
	Otu02619	Firmicutes(100)	Negativicutes(100)	Selenomonadales(100)	Veillonellaceae(100)	Veillonella(100)		0	0	0	0	0	0	0	0	0	0	0	1	0	0	0		0	0	0	0	0	0	0	0	0	0	0	0.005506	0	0	0
	Otu02622	Firmicutes(100)	Negativicutes(100)	Selenomonadales(100)	Veillonellaceae(100)	Veillonella(100)		0	0	0	0	1	0	0	0	0	0	0	0	0	0	0		0	0	0	0	0.0117647	0	0	0	0	0	0	0	0	0	0
	Otu02623	Firmicutes(100)	Negativicutes(100)	Selenomonadales(100)	Veillonellaceae(100)	Veillonella(100)		0	0	0	0	1	0	0	0	0	0	0	0	0	0	0		0	0	0	0	0.0117647	0	0	0	0	0	0	0	0	0	0
	Otu02625	Firmicutes(100)	Negativicutes(100)	Selenomonadales(100)	Veillonellaceae(100)	Veillonella(100)		0	0	0	0	1	0	0	0	0	0	0	0	0	0	0		0	0	0	0	0.0117647	0	0	0	0	0	0	0	0	0	0
	Otu02628	Firmicutes(100)	Negativicutes(100)	Selenomonadales(100)	Veillonellaceae(100)	Veillonella(100)		0	0	0	0	1	0	0	0	0	0	0	0	0	0	0		0	0	0	0	0.0117647	0	0	0	0	0	0	0	0	0	0
	Otu02634	Firmicutes(100)	Negativicutes(100)	Selenomonadales(100)	Veillonellaceae(100)	Veillonella(100)		0	0	0	1	0	0	0	0	0	0	0	0	0	0	0		0	0	0	0.0207641	0	0	0	0	0	0	0	0	0	0	0
	Otu02635	Firmicutes(100)	Negativicutes(100)	Selenomonadales(100)	Veillonellaceae(100)	Veillonella(100)		0	0	0	1	0	0	0	0	0	0	0	0	0	0	0		0	0	0	0.0207641	0	0	0	0	0	0	0	0	0	0	0
	Otu02636	Firmicutes(100)	Negativicutes(100)	Selenomonadales(100)	Veillonellaceae(100)	Veillonella(100)		0	0	0	0	0	0	0	0	0	1	0	0	0	0	0		0	0	0	0	0	0	0	0	0	0.00285861	0	0	0	0	0
	Otu02637	Firmicutes(100)	Negativicutes(100)	Selenomonadales(100)	Veillonellaceae(100)	Veillonella(100)		0	0	0	0	0	0	0	0	0	1	0	0	0	0	0		0	0	0	0	0	0	0	0	0	0.00285861	0	0	0	0	0
	Otu02638	Firmicutes(100)	Negativicutes(100)	Selenomonadales(100)	Veillonellaceae(100)	Veillonella(100)		0	0	0	0	0	0	0	0	0	1	0	0	0	0	0		0	0	0	0	0	0	0	0	0	0.00285861	0	0	0	0	0
	Otu02639	Firmicutes(100)	Negativicutes(100)	Selenomonadales(100)	Veillonellaceae(100)	Veillonella(100)		0	0	0	0	0	0	0	0	0	1	0	0	0	0	0		0	0	0	0	0	0	0	0	0	0.00285861	0	0	0	0	0
	Otu02640	Firmicutes(100)	Negativicutes(100)	Selenomonadales(100)	Veillonellaceae(100)	unclassified(100)		0	0	0	1	0	0	0	0	0	0	0	0	0	0	0		0	0	0	0.0207641	0	0	0	0	0	0	0	0	0	0	0
	Otu02641	Firmicutes(100)	Negativicutes(100)	Selenomonadales(100)	Veillonellaceae(100)	Veillonella(100)		0	0	0	0	0	0	0	0	0	1	0	0	0	0	0		0	0	0	0	0	0	0	0	0	0.00285861	0	0	0	0	0
	Otu02642	Firmicutes(100)	Negativicutes(100)	Selenomonadales(100)	Veillonellaceae(100)	Veillonella(100)		0	0	0	0	0	0	0	0	0	1	0	0	0	0	0		0	0	0	0	0	0	0	0	0	0.00285861	0	0	0	0	0
	Otu02643	Firmicutes(100)	Negativicutes(100)	Selenomonadales(100)	Veillonellaceae(100)	Veillonella(100)		0	0	0	0	0	0	0	0	0	1	0	0	0	0	0		0	0	0	0	0	0	0	0	0	0.00285861	0	0	0	0	0
	Otu02645	Firmicutes(100)	Negativicutes(100)	Selenomonadales(100)	Veillonellaceae(100)	Veillonella(100)		0	0	0	0	0	0	0	0	0	1	0	0	0	0	0		0	0	0	0	0	0	0	0	0	0.00285861	0	0	0	0	0
	Otu02646	Firmicutes(100)	Negativicutes(100)	Selenomonadales(100)	Veillonellaceae(100)	Veillonella(100)		0	0	0	1	0	0	0	0	0	0	0	0	0	0	0		0	0	0	0.0207641	0	0	0	0	0	0	0	0	0	0	0
	Otu02647	Firmicutes(100)	Negativicutes(100)	Selenomonadales(100)	Veillonellaceae(100)	Veillonella(100)		0	0	0	0	0	0	0	0	1	0	0	0	0	0	0		0	0	0	0	0	0	0	0	0.00687285	0	0	0	0	0	0
	Otu02649	Firmicutes(100)	Negativicutes(100)	Selenomonadales(100)	Veillonellaceae(100)	Veillonella(100)		0	0	0	1	0	0	0	0	0	0	0	0	0	0	0		0	0	0	0.0207641	0	0	0	0	0	0	0	0	0	0	0
	Otu02650	Firmicutes(100)	Negativicutes(100)	Selenomonadales(100)	Veillonellaceae(100)	Veillonella(100)		0	0	0	0	0	0	0	0	1	0	0	0	0	0	0		0	0	0	0	0	0	0	0	0.00687285	0	0	0	0	0	0
	Otu02653	Firmicutes(100)	Negativicutes(100)	Selenomonadales(100)	Veillonellaceae(100)	Veillonella(100)		0	0	0	1	0	0	0	0	0	0	0	0	0	0	0		0	0	0	0.0207641	0	0	0	0	0	0	0	0	0	0	0
	Otu02657	Firmicutes(100)	Negativicutes(100)	Selenomonadales(100)	Veillonellaceae(100)	unclassified(100)		0	0	0	1	0	0	0	0	0	0	0	0	0	0	0		0	0	0	0.0207641	0	0	0	0	0	0	0	0	0	0	0
	Otu02659	Firmicutes(100)	Negativicutes(100)	Selenomonadales(100)	Veillonellaceae(100)	Veillonella(100)		0	0	0	0	0	0	0	1	0	0	0	0	0	0	0		0	0	0	0	0	0	0	0.0169924	0	0	0	0	0	0	0
	Otu02660	Firmicutes(100)	Negativicutes(100)	Selenomonadales(100)	Veillonellaceae(100)	Veillonella(100)		0	0	0	0	0	0	0	0	0	1	0	0	0	0	0		0	0	0	0	0	0	0	0	0	0.00285861	0	0	0	0	0
	Otu02662	Firmicutes(100)	Negativicutes(100)	Selenomonadales(100)	Veillonellaceae(100)	Veillonella(100)		0	0	0	0	0	0	0	0	1	0	0	0	0	0	0		0	0	0	0	0	0	0	0	0.00687285	0	0	0	0	0	0
	Otu02663	Firmicutes(100)	Negativicutes(100)	Selenomonadales(100)	Veillonellaceae(100)	Veillonella(100)		0	0	0	0	0	0	0	0	0	1	0	0	0	0	0		0	0	0	0	0	0	0	0	0	0.00285861	0	0	0	0	0
	Otu02665	Firmicutes(100)	Negativicutes(100)	Selenomonadales(100)	Veillonellaceae(100)	Veillonella(100)		0	0	0	0	0	0	0	0	0	1	0	0	0	0	0		0	0	0	0	0	0	0	0	0	0.00285861	0	0	0	0	0
	Otu02668	Firmicutes(100)	Negativicutes(100)	Selenomonadales(100)	Veillonellaceae(100)	Veillonella(100)		0	0	0	0	0	0	0	0	1	0	0	0	0	0	0		0	0	0	0	0	0	0	0	0.00687285	0	0	0	0	0	0
	Otu02669	Firmicutes(100)	Negativicutes(100)	Selenomonadales(100)	Veillonellaceae(100)	Veillonella(100)		0	0	0	0	0	0	0	0	1	0	0	0	0	0	0		0	0	0	0	0	0	0	0	0.00687285	0	0	0	0	0	0
	Otu02675	Firmicutes(100)	Negativicutes(100)	Selenomonadales(100)	Veillonellaceae(100)	Veillonella(100)		0	0	0	0	0	0	0	0	1	0	0	0	0	0	0		0	0	0	0	0	0	0	0	0.00687285	0	0	0	0	0	0
	Otu02676	Firmicutes(100)	Negativicutes(100)	Selenomonadales(100)	Veillonellaceae(100)	Veillonella(100)		0	0	0	0	0	0	0	0	0	1	0	0	0	0	0		0	0	0	0	0	0	0	0	0	0.00285861	0	0	0	0	0
	Otu02677	Firmicutes(100)	Negativicutes(100)	Selenomonadales(100)	Veillonellaceae(100)	unclassified(100)		0	0	0	0	0	0	0	0	1	0	0	0	0	0	0		0	0	0	0	0	0	0	0	0.00687285	0	0	0	0	0	0
	Otu02678	Firmicutes(100)	Negativicutes(100)	Selenomonadales(100)	Veillonellaceae(100)	Veillonella(100)		0	0	0	0	0	0	0	0	0	1	0	0	0	0	0		0	0	0	0	0	0	0	0	0	0.00285861	0	0	0	0	0
	Otu02680	Firmicutes(100)	Negativicutes(100)	Selenomonadales(100)	Veillonellaceae(100)	Veillonella(100)		0	0	0	0	1	0	0	0	0	0	0	0	0	0	0		0	0	0	0	0.0117647	0	0	0	0	0	0	0	0	0	0
	Otu02681	Firmicutes(100)	Negativicutes(100)	Selenomonadales(100)	Veillonellaceae(100)	Veillonella(100)		0	0	0	0	0	0	0	0	0	1	0	0	0	0	0		0	0	0	0	0	0	0	0	0	0.00285861	0	0	0	0	0
	Otu02682	Firmicutes(100)	Negativicutes(100)	Selenomonadales(100)	Veillonellaceae(100)	Veillonella(100)		0	0	0	0	0	0	0	0	1	0	0	0	0	0	0		0	0	0	0	0	0	0	0	0.00687285	0	0	0	0	0	0
	Otu02684	Firmicutes(100)	Negativicutes(100)	Selenomonadales(100)	Veillonellaceae(100)	Veillonella(100)		0	0	0	0	0	0	0	0	1	0	0	0	0	0	0		0	0	0	0	0	0	0	0	0.00687285	0	0	0	0	0	0
	Otu02685	Firmicutes(100)	Negativicutes(100)	Selenomonadales(100)	Veillonellaceae(100)	unclassified(100)		0	0	0	0	0	0	0	0	0	1	0	0	0	0	0		0	0	0	0	0	0	0	0	0	0.00285861	0	0	0	0	0
	Otu02686	Firmicutes(100)	Negativicutes(100)	Selenomonadales(100)	Veillonellaceae(100)	Veillonella(100)		0	0	0	0	0	0	0	0	0	1	0	0	0	0	0		0	0	0	0	0	0	0	0	0	0.00285861	0	0	0	0	0
	Otu02687	Firmicutes(100)	Negativicutes(100)	Selenomonadales(100)	Veillonellaceae(100)	Veillonella(100)		0	0	0	0	0	0	0	0	1	0	0	0	0	0	0		0	0	0	0	0	0	0	0	0.00687285	0	0	0	0	0	0
	Otu02689	Firmicutes(100)	Negativicutes(100)	Selenomonadales(100)	Veillonellaceae(100)	Veillonella(100)		0	0	0	0	0	0	0	0	0	1	0	0	0	0	0		0	0	0	0	0	0	0	0	0	0.00285861	0	0	0	0	0
	Otu02692	Firmicutes(100)	Negativicutes(100)	Selenomonadales(100)	Veillonellaceae(100)	Veillonella(100)		0	0	0	0	0	0	0	0	0	1	0	0	0	0	0		0	0	0	0	0	0	0	0	0	0.00285861	0	0	0	0	0
	Otu02695	Firmicutes(100)	Negativicutes(100)	Selenomonadales(100)	Veillonellaceae(100)	Veillonella(100)		0	0	0	0	0	0	0	0	0	1	0	0	0	0	0		0	0	0	0	0	0	0	0	0	0.00285861	0	0	0	0	0
	Otu02696	Firmicutes(100)	Negativicutes(100)	Selenomonadales(100)	Veillonellaceae(100)	Veillonella(100)		0	0	0	0	0	0	0	0	1	0	0	0	0	0	0		0	0	0	0	0	0	0	0	0.00687285	0	0	0	0	0	0
	Otu00043	Firmicutes(100)	Clostridia(100)	Clostridiales(100)	Lachnospiraceae(100)	unclassified(100)		0	0	0	0	0	0	0	0	0	0	0	0	0	0	1		0	0	0	0	0	0	0	0	0	0	0	0	0	0	0.00561136
	Otu00046	Firmicutes(100)	Clostridia(100)	Clostridiales(100)	Lachnospiraceae(100)	Clostridium_XlVa(100)		0	0	0	0	0	0	0	0	0	0	0	0	0	0	1		0	0	0	0	0	0	0	0	0	0	0	0	0	0	0.00561136
	Otu00067	Actinobacteria(100)	Actinobacteria(100)	Actinomycetales(100)	Microbacteriaceae(100)	unclassified(79)		0	0	0	0	0	0	0	0	0	0	0	0	1	0	0		0	0	0	0	0	0	0	0	0	0	0	0	0.00785608	0	0
	Otu00098	Actinobacteria(100)	Actinobacteria(100)	Actinomycetales(100)	Propionibacteriaceae(100)	unclassified(100)		0	0	0	0	0	0	0	0	0	0	0	0	1	0	0		0	0	0	0	0	0	0	0	0	0	0	0	0.00785608	0	0
	Otu00107	Firmicutes(100)	Bacilli(100)	Lactobacillales(100)	unclassified(100)	unclassified(100)		0	0	0	0	0	0	0	0	0	0	0	0	0	0	1		0	0	0	0	0	0	0	0	0	0	0	0	0	0	0.00561136
	Otu00113	Actinobacteria(100)	Actinobacteria(100)	Actinomycetales(100)	Dermabacteraceae(100)	Brachybacterium(100)		0	0	0	0	0	0	0	0	0	0	0	0	1	0	0		0	0	0	0	0	0	0	0	0	0	0	0	0.00785608	0	0
	Otu00125	Proteobacteria(100)	Gammaproteobacteria(100)	Pseudomonadales(100)	Moraxellaceae(100)	Acinetobacter(100)		0	0	0	0	0	0	0	0	0	0	0	0	0	0	1		0	0	0	0	0	0	0	0	0	0	0	0	0	0	0.00561136
	Otu00151	Firmicutes(100)	Bacilli(100)	Lactobacillales(100)	Streptococcaceae(70)	Streptococcus(70)		0	0	0	0	0	0	0	0	0	0	0	0	1	0	0		0	0	0	0	0	0	0	0	0	0	0	0	0.00785608	0	0
	Otu00161	Actinobacteria(100)	Actinobacteria(100)	Actinomycetales(100)	Propionibacteriaceae(100)	Tessaracoccus(100)		0	0	0	0	0	0	0	0	0	0	0	0	0	0	1		0	0	0	0	0	0	0	0	0	0	0	0	0	0	0.00561136
	Otu00170	Firmicutes(100)	Bacilli(100)	Lactobacillales(100)	Streptococcaceae(100)	Streptococcus(100)		0	0	0	0	0	0	0	0	0	0	0	0	1	0	0		0	0	0	0	0	0	0	0	0	0	0	0	0.00785608	0	0
	Otu00171	Proteobacteria(100)	Betaproteobacteria(100)	Burkholderiales(100)	Burkholderiaceae(100)	Ralstonia(100)		0	0	0	0	0	0	0	0	0	0	0	0	0	0	1		0	0	0	0	0	0	0	0	0	0	0	0	0	0	0.00561136
	Otu00201	Firmicutes(100)	Clostridia(100)	Clostridiales(100)	Ruminococcaceae(100)	unclassified(100)		0	0	0	0	0	0	0	0	0	0	0	0	0	0	1		0	0	0	0	0	0	0	0	0	0	0	0	0	0	0.00561136
	Otu00212	unclassified(100)	unclassified(100)	unclassified(100)	unclassified(100)	unclassified(100)		0	0	0	0	0	0	0	0	0	0	0	0	0	0	1		0	0	0	0	0	0	0	0	0	0	0	0	0	0	0.00561136
	Otu00226	Actinobacteria(100)	Actinobacteria(100)	Actinomycetales(100)	unclassified(100)	unclassified(100)		0	0	0	0	0	0	0	0	0	0	0	0	1	0	0		0	0	0	0	0	0	0	0	0	0	0	0	0.00785608	0	0
	Otu00233	Actinobacteria(100)	Actinobacteria(100)	Actinomycetales(100)	Microbacteriaceae(100)	Microbacterium(100)		0	0	0	0	0	0	0	0	0	0	0	0	0	0	1		0	0	0	0	0	0	0	0	0	0	0	0	0	0	0.00561136
	Otu00291	Firmicutes(100)	Erysipelotrichia(100)	Erysipelotrichales(100)	Erysipelotrichaceae(100)	Turicibacter(100)		0	0	0	0	0	0	0	0	0	0	0	0	0	1	0		0	0	0	0	0	0	0	0	0	0	0	0	0	0.0118652	0
	Otu00295	Proteobacteria(100)	Gammaproteobacteria(100)	Enterobacteriales(100)	Enterobacteriaceae(100)	Proteus(100)		0	0	0	0	0	0	0	0	0	0	0	0	0	0	1		0	0	0	0	0	0	0	0	0	0	0	0	0	0	0.00561136
	Otu00296	Proteobacteria(100)	Gammaproteobacteria(100)	Pseudomonadales(100)	Moraxellaceae(100)	Psychrobacter(100)		0	0	0	0	0	0	0	0	0	0	0	0	1	0	0		0	0	0	0	0	0	0	0	0	0	0	0	0.00785608	0	0
	Otu00301	Firmicutes(100)	Clostridia(100)	Clostridiales(100)	Clostridiaceae_1(100)	unclassified(100)		0	0	0	0	0	0	0	0	0	0	0	0	1	0	0		0	0	0	0	0	0	0	0	0	0	0	0	0.00785608	0	0
	Otu00305	Bacteroidetes(100)	Sphingobacteriia(100)	Sphingobacteriales(100)	Sphingobacteriaceae(100)	Pedobacter(100)		0	0	0	0	0	0	0	0	0	0	0	0	0	0	1		0	0	0	0	0	0	0	0	0	0	0	0	0	0	0.00561136
	Otu00319	unclassified(100)	unclassified(100)	unclassified(100)	unclassified(100)	unclassified(100)		0	0	0	0	0	0	0	0	0	0	0	0	0	0	1		0	0	0	0	0	0	0	0	0	0	0	0	0	0	0.00561136
	Otu00333	Proteobacteria(100)	Gammaproteobacteria(100)	Xanthomonadales(100)	Xanthomonadaceae(100)	Lysobacter(100)		0	0	0	0	0	0	0	0	0	0	0	0	0	0	1		0	0	0	0	0	0	0	0	0	0	0	0	0	0	0.00561136
	Otu00359	Proteobacteria(100)	Deltaproteobacteria(100)	Desulfovibrionales(100)	Desulfovibrionaceae(100)	Desulfovibrio(67)		0	0	0	0	0	0	0	0	0	0	0	0	0	0	1		0	0	0	0	0	0	0	0	0	0	0	0	0	0	0.00561136
	Otu00363	Bacteroidetes(100)	Bacteroidia(100)	Bacteroidales(100)	Porphyromonadaceae(100)	unclassified(100)		0	0	0	0	0	0	0	0	0	0	0	0	0	1	0		0	0	0	0	0	0	0	0	0	0	0	0	0	0.0118652	0
	Otu00381	Firmicutes(100)	Erysipelotrichia(100)	Erysipelotrichales(100)	Erysipelotrichaceae(100)	Turicibacter(100)		0	0	0	0	0	0	0	0	0	0	0	0	0	0	1		0	0	0	0	0	0	0	0	0	0	0	0	0	0	0.00561136
	Otu00421	Firmicutes(100)	Erysipelotrichia(100)	Erysipelotrichales(100)	Erysipelotrichaceae(100)	Allobaculum(100)		0	0	0	0	0	0	0	0	0	0	0	0	1	0	0		0	0	0	0	0	0	0	0	0	0	0	0	0.00785608	0	0
	Otu00429	Firmicutes(100)	Bacilli(100)	Lactobacillales(100)	Leuconostocaceae(100)	Leuconostoc(100)		0	0	0	0	0	0	0	0	0	0	0	0	0	0	1		0	0	0	0	0	0	0	0	0	0	0	0	0	0	0.00561136
	Otu00430	Firmicutes(100)	Bacilli(100)	Lactobacillales(100)	Lactobacillaceae(100)	Lactobacillus(100)		0	0	0	0	0	0	0	0	0	0	0	0	1	0	0		0	0	0	0	0	0	0	0	0	0	0	0	0.00785608	0	0
	Otu00503	Bacteroidetes(100)	Sphingobacteriia(100)	Sphingobacteriales(100)	Cyclobacteriaceae(100)	unclassified(100)		0	0	0	0	0	0	0	0	0	0	0	0	1	0	0		0	0	0	0	0	0	0	0	0	0	0	0	0.00785608	0	0
	Otu00528	Bacteroidetes(100)	Flavobacteriia(100)	Flavobacteriales(100)	Flavobacteriaceae(100)	Flavobacterium(100)		0	0	0	0	0	0	0	0	0	0	0	0	1	0	0		0	0	0	0	0	0	0	0	0	0	0	0	0.00785608	0	0
	Otu00564	Bacteroidetes(100)	Flavobacteriia(100)	Flavobacteriales(100)	Flavobacteriaceae(100)	Chryseobacterium(100)		0	0	0	0	0	0	0	0	0	0	0	0	0	1	0		0	0	0	0	0	0	0	0	0	0	0	0	0	0.0118652	0
	Otu00565	Bacteroidetes(100)	Flavobacteriia(100)	Flavobacteriales(100)	Flavobacteriaceae(100)	Chryseobacterium(100)		0	0	0	0	0	0	0	0	0	0	0	0	0	0	1		0	0	0	0	0	0	0	0	0	0	0	0	0	0	0.00561136
	Otu00572	Firmicutes(100)	Bacilli(100)	Lactobacillales(100)	Lactobacillaceae(100)	Lactobacillus(100)		0	0	0	0	0	0	0	0	0	0	0	0	1	0	0		0	0	0	0	0	0	0	0	0	0	0	0	0.00785608	0	0
	Otu00585	Firmicutes(100)	Clostridia(100)	Clostridiales(100)	Lachnospiraceae(100)	Clostridium_XlVb(100)		0	0	0	0	0	0	0	0	0	0	0	0	1	0	0		0	0	0	0	0	0	0	0	0	0	0	0	0.00785608	0	0
	Otu00590	Actinobacteria(100)	Actinobacteria(100)	Actinomycetales(100)	Nocardioidaceae(100)	Nocardioides(100)		0	0	0	0	0	0	0	0	0	0	0	0	1	0	0		0	0	0	0	0	0	0	0	0	0	0	0	0.00785608	0	0
	Otu00605	Firmicutes(100)	Bacilli(100)	Lactobacillales(100)	unclassified(100)	unclassified(100)		0	0	0	0	0	0	0	0	0	0	0	0	0	1	0		0	0	0	0	0	0	0	0	0	0	0	0	0	0.0118652	0
	Otu00606	Firmicutes(100)	Bacilli(100)	Lactobacillales(100)	Leuconostocaceae(100)	Leuconostoc(100)		0	0	0	0	0	0	0	0	0	0	0	0	0	1	0		0	0	0	0	0	0	0	0	0	0	0	0	0	0.0118652	0
	Otu00610	Firmicutes(100)	Bacilli(100)	Lactobacillales(100)	Leuconostocaceae(100)	Leuconostoc(100)		0	0	0	0	0	0	0	0	0	0	0	0	1	0	0		0	0	0	0	0	0	0	0	0	0	0	0	0.00785608	0	0
	Otu00621	Proteobacteria(100)	Alphaproteobacteria(100)	Sphingomonadales(100)	Sphingomonadaceae(100)	Sphingopyxis(100)		0	0	0	0	0	0	0	0	0	0	0	0	0	0	1		0	0	0	0	0	0	0	0	0	0	0	0	0	0	0.00561136
	Otu00623	Firmicutes(100)	Clostridia(100)	Clostridiales(100)	Clostridiaceae_1(100)	unclassified(100)		0	0	0	0	0	0	0	0	0	0	0	0	1	0	0		0	0	0	0	0	0	0	0	0	0	0	0	0.00785608	0	0
	Otu00639	Proteobacteria(100)	Alphaproteobacteria(100)	Rhodospirillales(100)	Acetobacteraceae(100)	Acetobacter(100)		0	0	0	0	0	0	0	0	0	0	0	0	0	1	0		0	0	0	0	0	0	0	0	0	0	0	0	0	0.0118652	0
	Otu00642	Proteobacteria(100)	Gammaproteobacteria(100)	Vibrionales(100)	Vibrionaceae(100)	Vibrio(100)		0	0	0	0	0	0	0	0	0	0	0	0	0	0	1		0	0	0	0	0	0	0	0	0	0	0	0	0	0	0.00561136
	Otu00710	Firmicutes(100)	Clostridia(100)	Clostridiales(100)	Clostridiaceae_1(100)	unclassified(100)		0	0	0	0	0	0	0	0	0	0	0	0	0	0	1		0	0	0	0	0	0	0	0	0	0	0	0	0	0	0.00561136
	Otu00712	Firmicutes(100)	Clostridia(100)	Clostridiales(100)	Clostridiaceae_1(100)	unclassified(100)		0	0	0	0	0	0	0	0	0	0	0	0	0	0	1		0	0	0	0	0	0	0	0	0	0	0	0	0	0	0.00561136
	Otu00716	Firmicutes(100)	Clostridia(100)	Clostridiales(100)	Clostridiaceae_1(100)	unclassified(100)		0	0	0	0	0	0	0	0	0	0	0	0	0	0	1		0	0	0	0	0	0	0	0	0	0	0	0	0	0	0.00561136
	Otu00718	Firmicutes(100)	Clostridia(100)	Clostridiales(100)	Clostridiaceae_1(100)	unclassified(100)		0	0	0	0	0	0	0	0	0	0	0	0	0	0	1		0	0	0	0	0	0	0	0	0	0	0	0	0	0	0.00561136
	Otu00733	Firmicutes(100)	Clostridia(100)	Clostridiales(100)	unclassified(100)	unclassified(100)		0	0	0	0	0	0	0	0	0	0	0	0	1	0	0		0	0	0	0	0	0	0	0	0	0	0	0	0.00785608	0	0
	Otu00734	Firmicutes(100)	Clostridia(100)	Clostridiales(100)	Clostridiaceae_1(100)	unclassified(100)		0	0	0	0	0	0	0	0	0	0	0	0	0	0	1		0	0	0	0	0	0	0	0	0	0	0	0	0	0	0.00561136
	Otu00749	Firmicutes(100)	Clostridia(100)	Clostridiales(100)	Clostridiaceae_1(100)	unclassified(100)		0	0	0	0	0	0	0	0	0	0	0	0	0	1	0		0	0	0	0	0	0	0	0	0	0	0	0	0	0.0118652	0
	Otu00760	Firmicutes(100)	Clostridia(100)	Clostridiales(100)	Clostridiaceae_1(100)	unclassified(100)		0	0	0	0	0	0	0	0	0	0	0	0	0	1	0		0	0	0	0	0	0	0	0	0	0	0	0	0	0.0118652	0
	Otu00766	Firmicutes(100)	unclassified(100)	unclassified(100)	unclassified(100)	unclassified(100)		0	0	0	0	0	0	0	0	0	0	0	0	0	1	0		0	0	0	0	0	0	0	0	0	0	0	0	0	0.0118652	0
	Otu00767	Firmicutes(100)	unclassified(100)	unclassified(100)	unclassified(100)	unclassified(100)		0	0	0	0	0	0	0	0	0	0	0	0	0	1	0		0	0	0	0	0	0	0	0	0	0	0	0	0	0.0118652	0
	Otu00772	Firmicutes(100)	Clostridia(100)	Clostridiales(100)	Clostridiaceae_1(100)	unclassified(100)		0	0	0	0	0	0	0	0	0	0	0	0	1	0	0		0	0	0	0	0	0	0	0	0	0	0	0	0.00785608	0	0
	Otu00781	Firmicutes(100)	Clostridia(100)	Clostridiales(100)	Clostridiaceae_1(100)	unclassified(100)		0	0	0	0	0	0	0	0	0	0	0	0	1	0	0		0	0	0	0	0	0	0	0	0	0	0	0	0.00785608	0	0
	Otu00786	Firmicutes(100)	Clostridia(100)	Clostridiales(100)	Ruminococcaceae(100)	Clostridium_IV(100)		0	0	0	0	0	0	0	0	0	0	0	0	0	1	0		0	0	0	0	0	0	0	0	0	0	0	0	0	0.0118652	0
	Otu00793	Firmicutes(100)	Clostridia(100)	Clostridiales(100)	unclassified(100)	unclassified(100)		0	0	0	0	0	0	0	0	0	0	0	0	0	1	0		0	0	0	0	0	0	0	0	0	0	0	0	0	0.0118652	0
	Otu00795	Firmicutes(100)	Bacilli(100)	Lactobacillales(100)	Lactobacillaceae(100)	Lactobacillus(100)		0	0	0	0	0	0	0	0	0	0	0	0	1	0	0		0	0	0	0	0	0	0	0	0	0	0	0	0.00785608	0	0
	Otu00797	Firmicutes(100)	Bacilli(100)	Lactobacillales(100)	Lactobacillaceae(100)	Lactobacillus(100)		0	0	0	0	0	0	0	0	0	0	0	0	1	0	0		0	0	0	0	0	0	0	0	0	0	0	0	0.00785608	0	0
	Otu00798	Firmicutes(100)	Bacilli(100)	Lactobacillales(100)	unclassified(100)	unclassified(100)		0	0	0	0	0	0	0	0	0	0	0	0	1	0	0		0	0	0	0	0	0	0	0	0	0	0	0	0.00785608	0	0
	Otu00799	Firmicutes(100)	Bacilli(100)	Lactobacillales(100)	Streptococcaceae(100)	Streptococcus(100)		0	0	0	0	0	0	0	0	0	0	0	0	1	0	0		0	0	0	0	0	0	0	0	0	0	0	0	0.00785608	0	0
	Otu00801	Firmicutes(100)	Bacilli(100)	Lactobacillales(100)	Lactobacillaceae(100)	Lactobacillus(100)		0	0	0	0	0	0	0	0	0	0	0	0	1	0	0		0	0	0	0	0	0	0	0	0	0	0	0	0.00785608	0	0
	Otu00803	Firmicutes(100)	Bacilli(100)	Lactobacillales(100)	Streptococcaceae(100)	Streptococcus(100)		0	0	0	0	0	0	0	0	0	0	0	0	1	0	0		0	0	0	0	0	0	0	0	0	0	0	0	0.00785608	0	0
	Otu00804	Firmicutes(100)	Bacilli(100)	Lactobacillales(100)	Streptococcaceae(100)	Streptococcus(100)		0	0	0	0	0	0	0	0	0	0	0	0	1	0	0		0	0	0	0	0	0	0	0	0	0	0	0	0.00785608	0	0
	Otu00805	Firmicutes(100)	Bacilli(100)	Lactobacillales(100)	unclassified(100)	unclassified(100)		0	0	0	0	0	0	0	0	0	0	0	0	1	0	0		0	0	0	0	0	0	0	0	0	0	0	0	0.00785608	0	0
	Otu00806	Firmicutes(100)	Bacilli(100)	Lactobacillales(100)	unclassified(100)	unclassified(100)		0	0	0	0	0	0	0	0	0	0	0	0	1	0	0		0	0	0	0	0	0	0	0	0	0	0	0	0.00785608	0	0
	Otu00808	Firmicutes(100)	Bacilli(100)	Lactobacillales(100)	Streptococcaceae(100)	unclassified(100)		0	0	0	0	0	0	0	0	0	0	0	0	0	0	1		0	0	0	0	0	0	0	0	0	0	0	0	0	0	0.00561136
	Otu00809	Firmicutes(100)	Bacilli(100)	Lactobacillales(100)	Streptococcaceae(100)	unclassified(100)		0	0	0	0	0	0	0	0	0	0	0	0	0	0	1		0	0	0	0	0	0	0	0	0	0	0	0	0	0	0.00561136
	Otu00812	Firmicutes(100)	Bacilli(100)	Lactobacillales(100)	Streptococcaceae(100)	Streptococcus(100)		0	0	0	0	0	0	0	0	0	0	0	0	0	0	1		0	0	0	0	0	0	0	0	0	0	0	0	0	0	0.00561136
	Otu00814	Firmicutes(100)	Bacilli(100)	Lactobacillales(100)	Leuconostocaceae(100)	Leuconostoc(100)		0	0	0	0	0	0	0	0	0	0	0	0	1	0	0		0	0	0	0	0	0	0	0	0	0	0	0	0.00785608	0	0
	Otu00815	Firmicutes(100)	Bacilli(100)	Lactobacillales(100)	Lactobacillaceae(100)	unclassified(100)		0	0	0	0	0	0	0	0	0	0	0	0	0	0	1		0	0	0	0	0	0	0	0	0	0	0	0	0	0	0.00561136
	Otu00818	Firmicutes(100)	unclassified(100)	unclassified(100)	unclassified(100)	unclassified(100)		0	0	0	0	0	0	0	0	0	0	0	0	0	1	0		0	0	0	0	0	0	0	0	0	0	0	0	0	0.0118652	0
	Otu00829	Firmicutes(100)	Clostridia(100)	Clostridiales(100)	Clostridiaceae_1(100)	unclassified(100)		0	0	0	0	0	0	0	0	0	0	0	0	1	0	0		0	0	0	0	0	0	0	0	0	0	0	0	0.00785608	0	0
	Otu00897	Firmicutes(100)	Clostridia(100)	Clostridiales(100)	unclassified(100)	unclassified(100)		0	0	0	0	0	0	0	0	0	0	0	0	0	0	1		0	0	0	0	0	0	0	0	0	0	0	0	0	0	0.00561136
	Otu00901	Firmicutes(100)	Clostridia(100)	Clostridiales(100)	Peptostreptococcaceae(100)	Clostridium_XI(100)		0	0	0	0	0	0	0	0	0	0	0	0	1	0	0		0	0	0	0	0	0	0	0	0	0	0	0	0.00785608	0	0
	Otu00902	Firmicutes(100)	Clostridia(100)	Clostridiales(100)	Clostridiaceae_1(100)	unclassified(100)		0	0	0	0	0	0	0	0	0	0	0	0	1	0	0		0	0	0	0	0	0	0	0	0	0	0	0	0.00785608	0	0
	Otu00903	Firmicutes(100)	Clostridia(100)	Clostridiales(100)	Clostridiaceae_1(100)	unclassified(100)		0	0	0	0	0	0	0	0	0	0	0	0	1	0	0		0	0	0	0	0	0	0	0	0	0	0	0	0.00785608	0	0
	Otu00904	Firmicutes(100)	Clostridia(100)	Clostridiales(100)	Clostridiaceae_1(100)	Clostridium_sensu_stricto(100)		0	0	0	0	0	0	0	0	0	0	0	0	1	0	0		0	0	0	0	0	0	0	0	0	0	0	0	0.00785608	0	0
	Otu00905	Firmicutes(100)	Clostridia(100)	Clostridiales(100)	Clostridiaceae_1(100)	unclassified(100)		0	0	0	0	0	0	0	0	0	0	0	0	1	0	0		0	0	0	0	0	0	0	0	0	0	0	0	0.00785608	0	0
	Otu00906	Firmicutes(100)	Clostridia(100)	Clostridiales(100)	Clostridiaceae_1(100)	Clostridium_sensu_stricto(100)		0	0	0	0	0	0	0	0	0	0	0	0	0	1	0		0	0	0	0	0	0	0	0	0	0	0	0	0	0.0118652	0
	Otu00908	Firmicutes(100)	Clostridia(100)	Clostridiales(100)	Clostridiaceae_1(100)	unclassified(100)		0	0	0	0	0	0	0	0	0	0	0	0	1	0	0		0	0	0	0	0	0	0	0	0	0	0	0	0.00785608	0	0
	Otu00995	Proteobacteria(100)	Gammaproteobacteria(100)	Vibrionales(100)	Vibrionaceae(100)	Vibrio(100)		0	0	0	0	0	0	0	0	0	0	0	0	1	0	0		0	0	0	0	0	0	0	0	0	0	0	0	0.00785608	0	0
	Otu01006	unclassified(100)	unclassified(100)	unclassified(100)	unclassified(100)	unclassified(100)		0	0	0	0	0	0	0	0	0	0	0	0	0	0	1		0	0	0	0	0	0	0	0	0	0	0	0	0	0	0.00561136
	Otu01016	unclassified(100)	unclassified(100)	unclassified(100)	unclassified(100)	unclassified(100)		0	0	0	0	0	0	0	0	0	0	0	0	1	0	0		0	0	0	0	0	0	0	0	0	0	0	0	0.00785608	0	0
	Otu01026	unclassified(100)	unclassified(100)	unclassified(100)	unclassified(100)	unclassified(100)		0	0	0	0	0	0	0	0	0	0	0	0	0	0	1		0	0	0	0	0	0	0	0	0	0	0	0	0	0	0.00561136
	Otu01029	unclassified(100)	unclassified(100)	unclassified(100)	unclassified(100)	unclassified(100)		0	0	0	0	0	0	0	0	0	0	0	0	0	0	1		0	0	0	0	0	0	0	0	0	0	0	0	0	0	0.00561136
	Otu01108	Actinobacteria(100)	Actinobacteria(100)	Coriobacteriales(100)	Coriobacteriaceae(100)	Olsenella(100)		0	0	0	0	0	0	0	0	0	0	0	0	1	0	0		0	0	0	0	0	0	0	0	0	0	0	0	0.00785608	0	0
	Otu01141	Proteobacteria(100)	Gammaproteobacteria(100)	Pseudomonadales(100)	Moraxellaceae(100)	Acinetobacter(100)		0	0	0	0	0	0	0	0	0	0	0	0	0	0	1		0	0	0	0	0	0	0	0	0	0	0	0	0	0	0.00561136
	Otu01198	Bacteroidetes(100)	Bacteroidia(100)	Bacteroidales(100)	Porphyromonadaceae(100)	Dysgonomonas(100)		0	0	0	0	0	0	0	0	0	0	0	0	0	0	1		0	0	0	0	0	0	0	0	0	0	0	0	0	0	0.00561136
	Otu01227	Candidatus_Saccharibacteria(100)	unclassified(100)	unclassified(100)	unclassified(100)	unclassified(100)		0	0	0	0	0	0	0	0	0	0	0	0	1	0	0		0	0	0	0	0	0	0	0	0	0	0	0	0.00785608	0	0
	Otu01235	Candidatus_Saccharibacteria(100)	unclassified(100)	unclassified(100)	unclassified(100)	unclassified(100)		0	0	0	0	0	0	0	0	0	0	0	0	0	0	1		0	0	0	0	0	0	0	0	0	0	0	0	0	0	0.00561136
	Otu01338	Actinobacteria(100)	Actinobacteria(100)	Actinomycetales(100)	Microbacteriaceae(100)	unclassified(100)		0	0	0	0	0	0	0	0	0	0	0	0	1	0	0		0	0	0	0	0	0	0	0	0	0	0	0	0.00785608	0	0
	Otu01339	Actinobacteria(100)	Actinobacteria(100)	Actinomycetales(100)	Corynebacteriaceae(100)	unclassified(100)		0	0	0	0	0	0	0	0	0	0	0	0	0	1	0		0	0	0	0	0	0	0	0	0	0	0	0	0	0.0118652	0
	Otu01340	Actinobacteria(100)	Actinobacteria(100)	Actinomycetales(100)	Nocardioidaceae(100)	Nocardioides(100)		0	0	0	0	0	0	0	0	0	0	0	0	0	0	1		0	0	0	0	0	0	0	0	0	0	0	0	0	0	0.00561136
	Otu01341	Actinobacteria(100)	Actinobacteria(100)	Actinomycetales(100)	Propionibacteriaceae(100)	Friedmanniella(100)		0	0	0	0	0	0	0	0	0	0	0	0	0	0	1		0	0	0	0	0	0	0	0	0	0	0	0	0	0	0.00561136
	Otu01391	Firmicutes(100)	Erysipelotrichia(100)	Erysipelotrichales(100)	Erysipelotrichaceae(100)	Turicibacter(100)		0	0	0	0	0	0	0	0	0	0	0	0	0	0	1		0	0	0	0	0	0	0	0	0	0	0	0	0	0	0.00561136
	Otu01392	Firmicutes(100)	Erysipelotrichia(100)	Erysipelotrichales(100)	Erysipelotrichaceae(100)	Turicibacter(100)		0	0	0	0	0	0	0	0	0	0	0	0	0	0	1		0	0	0	0	0	0	0	0	0	0	0	0	0	0	0.00561136
	Otu01393	Firmicutes(100)	Erysipelotrichia(100)	Erysipelotrichales(100)	Erysipelotrichaceae(100)	Turicibacter(100)		0	0	0	0	0	0	0	0	0	0	0	0	0	0	1		0	0	0	0	0	0	0	0	0	0	0	0	0	0	0.00561136
	Otu01399	Firmicutes(100)	Erysipelotrichia(100)	Erysipelotrichales(100)	Erysipelotrichaceae(100)	Turicibacter(100)		0	0	0	0	0	0	0	0	0	0	0	0	0	1	0		0	0	0	0	0	0	0	0	0	0	0	0	0	0.0118652	0
	Otu01403	Firmicutes(100)	Erysipelotrichia(100)	Erysipelotrichales(100)	Erysipelotrichaceae(100)	Turicibacter(100)		0	0	0	0	0	0	0	0	0	0	0	0	1	0	0		0	0	0	0	0	0	0	0	0	0	0	0	0.00785608	0	0
	Otu01829	Proteobacteria(100)	Gammaproteobacteria(100)	Enterobacteriales(100)	Enterobacteriaceae(100)	Escherichia/Shigella(100)		0	0	0	0	0	0	0	0	0	0	0	0	1	0	0		0	0	0	0	0	0	0	0	0	0	0	0	0.00785608	0	0
	Otu01850	Verrucomicrobia(100)	unclassified(100)	unclassified(100)	unclassified(100)	unclassified(100)		0	0	0	0	0	0	0	0	0	0	0	0	0	0	1		0	0	0	0	0	0	0	0	0	0	0	0	0	0	0.00561136
	Otu01852	Actinobacteria(100)	unclassified(100)	unclassified(100)	unclassified(100)	unclassified(100)		0	0	0	0	0	0	0	0	0	0	0	0	0	0	1		0	0	0	0	0	0	0	0	0	0	0	0	0	0	0.00561136
	Otu01879	Actinobacteria(100)	Actinobacteria(100)	Gaiellales(100)	Gaiellaceae(100)	Gaiella(100)		0	0	0	0	0	0	0	0	0	0	0	0	0	0	1		0	0	0	0	0	0	0	0	0	0	0	0	0	0	0.00561136
	Otu01982	Proteobacteria(100)	Gammaproteobacteria(100)	Enterobacteriales(100)	Enterobacteriaceae(100)	Escherichia/Shigella(100)		0	0	0	0	0	0	0	0	0	0	0	0	0	0	1		0	0	0	0	0	0	0	0	0	0	0	0	0	0	0.00561136
	Otu02015	Proteobacteria(100)	Gammaproteobacteria(100)	Enterobacteriales(100)	Enterobacteriaceae(100)	unclassified(100)		0	0	0	0	0	0	0	0	0	0	0	0	1	0	0		0	0	0	0	0	0	0	0	0	0	0	0	0.00785608	0	0
	Otu02029	Proteobacteria(100)	Gammaproteobacteria(100)	Enterobacteriales(100)	Enterobacteriaceae(100)	Escherichia/Shigella(100)		0	0	0	0	0	0	0	0	0	0	0	0	1	0	0		0	0	0	0	0	0	0	0	0	0	0	0	0.00785608	0	0
	Otu02054	Proteobacteria(100)	Gammaproteobacteria(100)	Enterobacteriales(100)	Enterobacteriaceae(100)	Escherichia/Shigella(100)		0	0	0	0	0	0	0	0	0	0	0	0	1	0	0		0	0	0	0	0	0	0	0	0	0	0	0	0.00785608	0	0
	Otu02060	Proteobacteria(100)	Gammaproteobacteria(100)	Enterobacteriales(100)	Enterobacteriaceae(100)	Escherichia/Shigella(100)		0	0	0	0	0	0	0	0	0	0	0	0	1	0	0		0	0	0	0	0	0	0	0	0	0	0	0	0.00785608	0	0
	Otu02090	Firmicutes(100)	Bacilli(100)	Lactobacillales(100)	unclassified(100)	unclassified(100)		0	0	0	0	0	0	0	0	0	0	0	0	0	1	0		0	0	0	0	0	0	0	0	0	0	0	0	0	0.0118652	0
	Otu02101	Firmicutes(100)	Bacilli(100)	Lactobacillales(100)	Lactobacillaceae(100)	unclassified(100)		0	0	0	0	0	0	0	0	0	0	0	0	0	1	0		0	0	0	0	0	0	0	0	0	0	0	0	0	0.0118652	0
	Otu02105	Firmicutes(100)	Bacilli(100)	Lactobacillales(100)	Leuconostocaceae(100)	Leuconostoc(100)		0	0	0	0	0	0	0	0	0	0	0	0	1	0	0		0	0	0	0	0	0	0	0	0	0	0	0	0.00785608	0	0
	Otu02106	Firmicutes(100)	Bacilli(100)	Lactobacillales(100)	Lactobacillaceae(100)	unclassified(100)		0	0	0	0	0	0	0	0	0	0	0	0	0	1	0		0	0	0	0	0	0	0	0	0	0	0	0	0	0.0118652	0
	Otu02135	Firmicutes(100)	Bacilli(100)	Lactobacillales(100)	unclassified(100)	unclassified(100)		0	0	0	0	0	0	0	0	0	0	0	0	0	1	0		0	0	0	0	0	0	0	0	0	0	0	0	0	0.0118652	0
	Otu02149	Firmicutes(100)	Bacilli(100)	Lactobacillales(100)	Lactobacillaceae(100)	unclassified(100)		0	0	0	0	0	0	0	0	0	0	0	0	0	1	0		0	0	0	0	0	0	0	0	0	0	0	0	0	0.0118652	0
	Otu02232	Firmicutes(100)	Bacilli(100)	Lactobacillales(100)	unclassified(100)	unclassified(100)		0	0	0	0	0	0	0	0	0	0	0	0	0	1	0		0	0	0	0	0	0	0	0	0	0	0	0	0	0.0118652	0
	Otu02242	Firmicutes(100)	Bacilli(100)	Lactobacillales(100)	unclassified(100)	unclassified(100)		0	0	0	0	0	0	0	0	0	0	0	0	0	0	1		0	0	0	0	0	0	0	0	0	0	0	0	0	0	0.00561136
	Otu02244	Firmicutes(100)	Bacilli(100)	Lactobacillales(100)	Lactobacillaceae(100)	Lactobacillus(100)		0	0	0	0	0	0	0	0	0	0	0	0	0	1	0		0	0	0	0	0	0	0	0	0	0	0	0	0	0.0118652	0
	Otu02245	Firmicutes(100)	Bacilli(100)	Lactobacillales(100)	unclassified(100)	unclassified(100)		0	0	0	0	0	0	0	0	0	0	0	0	0	1	0		0	0	0	0	0	0	0	0	0	0	0	0	0	0.0118652	0
	Otu02247	Firmicutes(100)	Bacilli(100)	Lactobacillales(100)	unclassified(100)	unclassified(100)		0	0	0	0	0	0	0	0	0	0	0	0	0	0	1		0	0	0	0	0	0	0	0	0	0	0	0	0	0	0.00561136
	Otu02249	Firmicutes(100)	Bacilli(100)	Lactobacillales(100)	Streptococcaceae(100)	Lactococcus(100)		0	0	0	0	0	0	0	0	0	0	0	0	0	0	1		0	0	0	0	0	0	0	0	0	0	0	0	0	0	0.00561136
	Otu02251	Firmicutes(100)	Bacilli(100)	Lactobacillales(100)	Leuconostocaceae(100)	Leuconostoc(100)		0	0	0	0	0	0	0	0	0	0	0	0	0	1	0		0	0	0	0	0	0	0	0	0	0	0	0	0	0.0118652	0
	Otu02253	Firmicutes(100)	Bacilli(100)	Lactobacillales(100)	Leuconostocaceae(100)	Leuconostoc(100)		0	0	0	0	0	0	0	0	0	0	0	0	0	0	1		0	0	0	0	0	0	0	0	0	0	0	0	0	0	0.00561136
	Otu02254	Firmicutes(100)	Bacilli(100)	Lactobacillales(100)	Lactobacillaceae(100)	Lactobacillus(100)		0	0	0	0	0	0	0	0	0	0	0	0	0	0	1		0	0	0	0	0	0	0	0	0	0	0	0	0	0	0.00561136
	Otu02256	Firmicutes(100)	Bacilli(100)	Lactobacillales(100)	Streptococcaceae(100)	Streptococcus(100)		0	0	0	0	0	0	0	0	0	0	0	0	0	0	1		0	0	0	0	0	0	0	0	0	0	0	0	0	0	0.00561136
	Otu02262	Firmicutes(100)	Bacilli(100)	Lactobacillales(100)	Lactobacillaceae(100)	unclassified(100)		0	0	0	0	0	0	0	0	0	0	0	0	1	0	0		0	0	0	0	0	0	0	0	0	0	0	0	0.00785608	0	0
	Otu02268	Firmicutes(100)	Bacilli(100)	Lactobacillales(100)	Streptococcaceae(100)	Streptococcus(100)		0	0	0	0	0	0	0	0	0	0	0	0	0	0	1		0	0	0	0	0	0	0	0	0	0	0	0	0	0	0.00561136
	Otu02272	Firmicutes(100)	Bacilli(100)	Lactobacillales(100)	Lactobacillaceae(100)	Lactobacillus(100)		0	0	0	0	0	0	0	0	0	0	0	0	1	0	0		0	0	0	0	0	0	0	0	0	0	0	0	0.00785608	0	0
	Otu02273	Firmicutes(100)	Bacilli(100)	Lactobacillales(100)	Lactobacillaceae(100)	Lactobacillus(100)		0	0	0	0	0	0	0	0	0	0	0	0	1	0	0		0	0	0	0	0	0	0	0	0	0	0	0	0.00785608	0	0
	Otu02274	Firmicutes(100)	Bacilli(100)	Lactobacillales(100)	Leuconostocaceae(100)	Leuconostoc(100)		0	0	0	0	0	0	0	0	0	0	0	0	1	0	0		0	0	0	0	0	0	0	0	0	0	0	0	0.00785608	0	0
	Otu02275	Firmicutes(100)	Bacilli(100)	Lactobacillales(100)	Lactobacillaceae(100)	Lactobacillus(100)		0	0	0	0	0	0	0	0	0	0	0	0	1	0	0		0	0	0	0	0	0	0	0	0	0	0	0	0.00785608	0	0
	Otu02279	Firmicutes(100)	Bacilli(100)	Lactobacillales(100)	Streptococcaceae(100)	Streptococcus(100)		0	0	0	0	0	0	0	0	0	0	0	0	1	0	0		0	0	0	0	0	0	0	0	0	0	0	0	0.00785608	0	0
	Otu02286	Firmicutes(100)	Bacilli(100)	Lactobacillales(100)	Lactobacillaceae(100)	unclassified(100)		0	0	0	0	0	0	0	0	0	0	0	0	1	0	0		0	0	0	0	0	0	0	0	0	0	0	0	0.00785608	0	0
	Otu02293	Firmicutes(100)	Bacilli(100)	Lactobacillales(100)	unclassified(100)	unclassified(100)		0	0	0	0	0	0	0	0	0	0	0	0	1	0	0		0	0	0	0	0	0	0	0	0	0	0	0	0.00785608	0	0
	Otu02300	Firmicutes(100)	Bacilli(100)	Lactobacillales(100)	Streptococcaceae(100)	Streptococcus(100)		0	0	0	0	0	0	0	0	0	0	0	0	1	0	0		0	0	0	0	0	0	0	0	0	0	0	0	0.00785608	0	0
	Otu02304	Firmicutes(100)	Bacilli(100)	Lactobacillales(100)	unclassified(100)	unclassified(100)		0	0	0	0	0	0	0	0	0	0	0	0	1	0	0		0	0	0	0	0	0	0	0	0	0	0	0	0.00785608	0	0
	Otu02309	Firmicutes(100)	Bacilli(100)	Lactobacillales(100)	Lactobacillaceae(100)	unclassified(100)		0	0	0	0	0	0	0	0	0	0	0	0	1	0	0		0	0	0	0	0	0	0	0	0	0	0	0	0.00785608	0	0
	Otu02349	Firmicutes(100)	Bacilli(100)	Lactobacillales(100)	Streptococcaceae(100)	Streptococcus(100)		0	0	0	0	0	0	0	0	0	0	0	0	0	0	1		0	0	0	0	0	0	0	0	0	0	0	0	0	0	0.00561136
	Otu02358	Firmicutes(100)	Bacilli(100)	Lactobacillales(100)	unclassified(100)	unclassified(100)		0	0	0	0	0	0	0	0	0	0	0	0	0	0	1		0	0	0	0	0	0	0	0	0	0	0	0	0	0	0.00561136
	Otu02366	Firmicutes(100)	Bacilli(100)	Lactobacillales(100)	unclassified(100)	unclassified(100)		0	0	0	0	0	0	0	0	0	0	0	0	0	0	1		0	0	0	0	0	0	0	0	0	0	0	0	0	0	0.00561136
	Otu02367	Firmicutes(100)	Bacilli(100)	Lactobacillales(100)	Streptococcaceae(100)	Streptococcus(100)		0	0	0	0	0	0	0	0	0	0	0	0	0	0	1		0	0	0	0	0	0	0	0	0	0	0	0	0	0	0.00561136
	Otu02379	Firmicutes(100)	Bacilli(100)	Lactobacillales(100)	unclassified(100)	unclassified(100)		0	0	0	0	0	0	0	0	0	0	0	0	0	0	1		0	0	0	0	0	0	0	0	0	0	0	0	0	0	0.00561136
	Otu00039	Actinobacteria(100)	Actinobacteria(100)	Actinomycetales(100)	Propionibacteriaceae(100)	Friedmanniella(100)		0	2	1	0	0	0	0	0	0	0	0	0	0	0	0		0	0.0196831	0.0222965	0	0	0	0	0	0	0	0	0	0	0	0
	Otu00116	Firmicutes(100)	Bacilli(100)	Bacillales(100)	Staphylococcaceae(100)	Staphylococcus(100)		0	2	0	0	0	0	0	0	0	0	0	0	0	0	0		0	0.0196831	0	0	0	0	0	0	0	0	0	0	0	0	0
	Otu00189	Proteobacteria(100)	Gammaproteobacteria(100)	Enterobacteriales(100)	Enterobacteriaceae(100)	Escherichia/Shigella(100)		0	2	0	0	0	0	0	0	0	0	0	0	0	0	0		0	0.0196831	0	0	0	0	0	0	0	0	0	0	0	0	0
	Otu00090	Firmicutes(100)	Bacilli(100)	Bacillales(100)	Paenibacillaceae_1(100)	Paenibacillus(92)		0	1	0	0	0	0	0	0	0	0	0	0	0	0	0		0	0.00984155	0	0	0	0	0	0	0	0	0	0	0	0	0
	Otu00119	Bacteroidetes(100)	Cytophagia(100)	Cytophagales(100)	Cytophagaceae(100)	Hymenobacter(100)		0	1	0	0	0	0	0	0	0	0	0	0	0	0	0		0	0.00984155	0	0	0	0	0	0	0	0	0	0	0	0	0
	Otu00180	Proteobacteria(100)	Betaproteobacteria(100)	Neisseriales(100)	Neisseriaceae(100)	unclassified(100)		0	1	0	0	0	0	0	0	0	0	0	0	0	0	0		0	0.00984155	0	0	0	0	0	0	0	0	0	0	0	0	0
	Otu00299	Proteobacteria(100)	Gammaproteobacteria(100)	Pseudomonadales(100)	Moraxellaceae(100)	Acinetobacter(100)		0	0	1	0	0	0	0	0	0	0	0	0	0	0	0		0	0	0.0222965	0	0	0	0	0	0	0	0	0	0	0	0
	Otu00360	Bacteroidetes(100)	Sphingobacteriia(100)	Sphingobacteriales(100)	Sphingobacteriaceae(100)	Sphingobacterium(100)		0	1	0	0	0	0	0	0	0	0	0	0	0	0	0		0	0.00984155	0	0	0	0	0	0	0	0	0	0	0	0	0
	Otu00373	Firmicutes(100)	Erysipelotrichia(100)	Erysipelotrichales(100)	Erysipelotrichaceae(100)	Turicibacter(100)		0	0	1	0	0	0	0	0	0	0	0	0	0	0	0		0	0	0.0222965	0	0	0	0	0	0	0	0	0	0	0	0
	Otu00419	Proteobacteria(100)	Betaproteobacteria(100)	Neisseriales(100)	Neisseriaceae(100)	unclassified(100)		0	0	1	0	0	0	0	0	0	0	0	0	0	0	0		0	0	0.0222965	0	0	0	0	0	0	0	0	0	0	0	0
	Otu00497	Proteobacteria(100)	Gammaproteobacteria(100)	Enterobacteriales(100)	Enterobacteriaceae(100)	Escherichia/Shigella(100)		0	1	0	0	0	0	0	0	0	0	0	0	0	0	0		0	0.00984155	0	0	0	0	0	0	0	0	0	0	0	0	0
	Otu00526	Proteobacteria(100)	Alphaproteobacteria(100)	Rhizobiales(100)	Methylobacteriaceae(100)	Methylobacterium(100)		0	1	0	0	0	0	0	0	0	0	0	0	0	0	0		0	0.00984155	0	0	0	0	0	0	0	0	0	0	0	0	0
	Otu00560	Firmicutes(100)	Clostridia(100)	Clostridiales(100)	Clostridiaceae_1(100)	unclassified(100)		0	1	0	0	0	0	0	0	0	0	0	0	0	0	0		0	0.00984155	0	0	0	0	0	0	0	0	0	0	0	0	0
	Otu00592	unclassified(100)	unclassified(100)	unclassified(100)	unclassified(100)	unclassified(100)		0	0	1	0	0	0	0	0	0	0	0	0	0	0	0		0	0	0.0222965	0	0	0	0	0	0	0	0	0	0	0	0
	Otu00593	unclassified(100)	unclassified(100)	unclassified(100)	unclassified(100)	unclassified(100)		0	0	1	0	0	0	0	0	0	0	0	0	0	0	0		0	0	0.0222965	0	0	0	0	0	0	0	0	0	0	0	0
	Otu00594	unclassified(100)	unclassified(100)	unclassified(100)	unclassified(100)	unclassified(100)		0	0	1	0	0	0	0	0	0	0	0	0	0	0	0		0	0	0.0222965	0	0	0	0	0	0	0	0	0	0	0	0
	Otu00602	Proteobacteria(100)	Gammaproteobacteria(100)	Aeromonadales(100)	Aeromonadaceae(100)	Aeromonas(100)		0	0	1	0	0	0	0	0	0	0	0	0	0	0	0		0	0	0.0222965	0	0	0	0	0	0	0	0	0	0	0	0
	Otu00613	Bacteroidetes(100)	Bacteroidia(100)	Bacteroidales(100)	Porphyromonadaceae(100)	Porphyromonas(100)		0	0	1	0	0	0	0	0	0	0	0	0	0	0	0		0	0	0.0222965	0	0	0	0	0	0	0	0	0	0	0	0
	Otu00666	Firmicutes(100)	Clostridia(100)	Clostridiales(100)	unclassified(100)	unclassified(100)		0	0	1	0	0	0	0	0	0	0	0	0	0	0	0		0	0	0.0222965	0	0	0	0	0	0	0	0	0	0	0	0
	Otu00785	Firmicutes(100)	Clostridia(100)	Clostridiales(100)	Clostridiaceae_1(100)	unclassified(100)		0	1	0	0	0	0	0	0	0	0	0	0	0	0	0		0	0.00984155	0	0	0	0	0	0	0	0	0	0	0	0	0
	Otu00789	Firmicutes(100)	Clostridia(100)	Clostridiales(100)	Clostridiaceae_1(100)	Clostridium_sensu_stricto(100)		0	1	0	0	0	0	0	0	0	0	0	0	0	0	0		0	0.00984155	0	0	0	0	0	0	0	0	0	0	0	0	0
	Otu00790	Firmicutes(100)	Clostridia(100)	Clostridiales(100)	Clostridiaceae_1(100)	unclassified(100)		0	1	0	0	0	0	0	0	0	0	0	0	0	0	0		0	0.00984155	0	0	0	0	0	0	0	0	0	0	0	0	0
	Otu00791	Firmicutes(100)	Clostridia(100)	Clostridiales(100)	Clostridiaceae_1(100)	unclassified(100)		0	1	0	0	0	0	0	0	0	0	0	0	0	0	0		0	0.00984155	0	0	0	0	0	0	0	0	0	0	0	0	0
	Otu00792	Firmicutes(100)	Clostridia(100)	Clostridiales(100)	Clostridiaceae_1(100)	unclassified(100)		0	1	0	0	0	0	0	0	0	0	0	0	0	0	0		0	0.00984155	0	0	0	0	0	0	0	0	0	0	0	0	0
	Otu00857	Firmicutes(100)	Clostridia(100)	Clostridiales(100)	Clostridiaceae_1(100)	unclassified(100)		0	1	0	0	0	0	0	0	0	0	0	0	0	0	0		0	0.00984155	0	0	0	0	0	0	0	0	0	0	0	0	0
	Otu00914	Firmicutes(100)	Clostridia(100)	Clostridiales(100)	unclassified(100)	unclassified(100)		0	1	0	0	0	0	0	0	0	0	0	0	0	0	0		0	0.00984155	0	0	0	0	0	0	0	0	0	0	0	0	0
	Otu00934	unclassified(100)	unclassified(100)	unclassified(100)	unclassified(100)	unclassified(100)		0	0	1	0	0	0	0	0	0	0	0	0	0	0	0		0	0	0.0222965	0	0	0	0	0	0	0	0	0	0	0	0
	Otu00935	unclassified(100)	unclassified(100)	unclassified(100)	unclassified(100)	unclassified(100)		0	0	1	0	0	0	0	0	0	0	0	0	0	0	0		0	0	0.0222965	0	0	0	0	0	0	0	0	0	0	0	0
	Otu00936	unclassified(100)	unclassified(100)	unclassified(100)	unclassified(100)	unclassified(100)		0	1	0	0	0	0	0	0	0	0	0	0	0	0	0		0	0.00984155	0	0	0	0	0	0	0	0	0	0	0	0	0
	Otu00937	unclassified(100)	unclassified(100)	unclassified(100)	unclassified(100)	unclassified(100)		0	1	0	0	0	0	0	0	0	0	0	0	0	0	0		0	0.00984155	0	0	0	0	0	0	0	0	0	0	0	0	0
	Otu00956	unclassified(100)	unclassified(100)	unclassified(100)	unclassified(100)	unclassified(100)		0	1	0	0	0	0	0	0	0	0	0	0	0	0	0		0	0.00984155	0	0	0	0	0	0	0	0	0	0	0	0	0
	Otu01066	Bacteroidetes(100)	Sphingobacteriia(100)	Sphingobacteriales(100)	Chitinophagaceae(100)	unclassified(100)		0	1	0	0	0	0	0	0	0	0	0	0	0	0	0		0	0.00984155	0	0	0	0	0	0	0	0	0	0	0	0	0
	Otu01154	Proteobacteria(100)	unclassified(100)	unclassified(100)	unclassified(100)	unclassified(100)		0	1	0	0	0	0	0	0	0	0	0	0	0	0	0		0	0.00984155	0	0	0	0	0	0	0	0	0	0	0	0	0
	Otu01233	Candidatus_Saccharibacteria(100)	unclassified(100)	unclassified(100)	unclassified(100)	unclassified(100)		0	1	0	0	0	0	0	0	0	0	0	0	0	0	0		0	0.00984155	0	0	0	0	0	0	0	0	0	0	0	0	0
	Otu01234	Candidatus_Saccharibacteria(100)	unclassified(100)	unclassified(100)	unclassified(100)	unclassified(100)		0	1	0	0	0	0	0	0	0	0	0	0	0	0	0		0	0.00984155	0	0	0	0	0	0	0	0	0	0	0	0	0
	Otu01379	Proteobacteria(100)	Gammaproteobacteria(100)	Pasteurellales(100)	Pasteurellaceae(100)	unclassified(100)		0	1	0	0	0	0	0	0	0	0	0	0	0	0	0		0	0.00984155	0	0	0	0	0	0	0	0	0	0	0	0	0
	Otu01380	Proteobacteria(100)	Gammaproteobacteria(100)	Pasteurellales(100)	Pasteurellaceae(100)	unclassified(100)		0	1	0	0	0	0	0	0	0	0	0	0	0	0	0		0	0.00984155	0	0	0	0	0	0	0	0	0	0	0	0	0
	Otu01381	Proteobacteria(100)	Gammaproteobacteria(100)	Pasteurellales(100)	Pasteurellaceae(100)	unclassified(100)		0	1	0	0	0	0	0	0	0	0	0	0	0	0	0		0	0.00984155	0	0	0	0	0	0	0	0	0	0	0	0	0
	Otu01382	Proteobacteria(100)	Gammaproteobacteria(100)	Pasteurellales(100)	Pasteurellaceae(100)	unclassified(100)		0	1	0	0	0	0	0	0	0	0	0	0	0	0	0		0	0.00984155	0	0	0	0	0	0	0	0	0	0	0	0	0
	Otu01384	Proteobacteria(100)	Gammaproteobacteria(100)	Pasteurellales(100)	Pasteurellaceae(100)	unclassified(100)		0	0	1	0	0	0	0	0	0	0	0	0	0	0	0		0	0	0.0222965	0	0	0	0	0	0	0	0	0	0	0	0
	Otu01419	Firmicutes(100)	Erysipelotrichia(100)	Erysipelotrichales(100)	Erysipelotrichaceae(100)	Turicibacter(100)		0	0	1	0	0	0	0	0	0	0	0	0	0	0	0		0	0	0.0222965	0	0	0	0	0	0	0	0	0	0	0	0
	Otu01490	Proteobacteria(100)	Gammaproteobacteria(100)	Enterobacteriales(100)	Enterobacteriaceae(100)	Escherichia/Shigella(100)		0	0	1	0	0	0	0	0	0	0	0	0	0	0	0		0	0	0.0222965	0	0	0	0	0	0	0	0	0	0	0	0
	Otu01495	Proteobacteria(100)	Gammaproteobacteria(100)	Enterobacteriales(100)	Enterobacteriaceae(100)	Escherichia/Shigella(100)		0	0	1	0	0	0	0	0	0	0	0	0	0	0	0		0	0	0.0222965	0	0	0	0	0	0	0	0	0	0	0	0
	Otu01496	Proteobacteria(100)	Gammaproteobacteria(100)	Enterobacteriales(100)	Enterobacteriaceae(100)	Escherichia/Shigella(100)		0	0	1	0	0	0	0	0	0	0	0	0	0	0	0		0	0	0.0222965	0	0	0	0	0	0	0	0	0	0	0	0
	Otu01507	Proteobacteria(100)	Gammaproteobacteria(100)	Enterobacteriales(100)	Enterobacteriaceae(100)	Escherichia/Shigella(100)		0	0	1	0	0	0	0	0	0	0	0	0	0	0	0		0	0	0.0222965	0	0	0	0	0	0	0	0	0	0	0	0
	Otu01508	Proteobacteria(100)	Gammaproteobacteria(100)	Enterobacteriales(100)	Enterobacteriaceae(100)	Escherichia/Shigella(100)		0	0	1	0	0	0	0	0	0	0	0	0	0	0	0		0	0	0.0222965	0	0	0	0	0	0	0	0	0	0	0	0
	Otu01574	Proteobacteria(100)	Gammaproteobacteria(100)	Enterobacteriales(100)	Enterobacteriaceae(100)	unclassified(100)		0	0	1	0	0	0	0	0	0	0	0	0	0	0	0		0	0	0.0222965	0	0	0	0	0	0	0	0	0	0	0	0
	Otu01582	Proteobacteria(100)	Gammaproteobacteria(100)	Enterobacteriales(100)	Enterobacteriaceae(100)	Escherichia/Shigella(100)		0	1	0	0	0	0	0	0	0	0	0	0	0	0	0		0	0.00984155	0	0	0	0	0	0	0	0	0	0	0	0	0
	Otu01592	Proteobacteria(100)	Gammaproteobacteria(100)	Enterobacteriales(100)	Enterobacteriaceae(100)	Escherichia/Shigella(100)		0	1	0	0	0	0	0	0	0	0	0	0	0	0	0		0	0.00984155	0	0	0	0	0	0	0	0	0	0	0	0	0
	Otu01594	Proteobacteria(100)	Gammaproteobacteria(100)	Enterobacteriales(100)	Enterobacteriaceae(100)	Escherichia/Shigella(100)		0	0	1	0	0	0	0	0	0	0	0	0	0	0	0		0	0	0.0222965	0	0	0	0	0	0	0	0	0	0	0	0
	Otu01769	Proteobacteria(100)	Gammaproteobacteria(100)	Enterobacteriales(100)	Enterobacteriaceae(100)	Escherichia/Shigella(100)		0	1	0	0	0	0	0	0	0	0	0	0	0	0	0		0	0.00984155	0	0	0	0	0	0	0	0	0	0	0	0	0
	Otu01784	Proteobacteria(100)	Gammaproteobacteria(100)	Enterobacteriales(100)	Enterobacteriaceae(100)	Escherichia/Shigella(100)		0	1	0	0	0	0	0	0	0	0	0	0	0	0	0		0	0.00984155	0	0	0	0	0	0	0	0	0	0	0	0	0
	Otu01797	Proteobacteria(100)	Gammaproteobacteria(100)	Enterobacteriales(100)	Enterobacteriaceae(100)	Escherichia/Shigella(100)		0	1	0	0	0	0	0	0	0	0	0	0	0	0	0		0	0.00984155	0	0	0	0	0	0	0	0	0	0	0	0	0
	Otu01810	Proteobacteria(100)	Gammaproteobacteria(100)	Enterobacteriales(100)	Enterobacteriaceae(100)	Escherichia/Shigella(100)		0	1	0	0	0	0	0	0	0	0	0	0	0	0	0		0	0.00984155	0	0	0	0	0	0	0	0	0	0	0	0	0
	Otu01882	Actinobacteria(100)	Actinobacteria(100)	unclassified(100)	unclassified(100)	unclassified(100)		0	0	1	0	0	0	0	0	0	0	0	0	0	0	0		0	0	0.0222965	0	0	0	0	0	0	0	0	0	0	0	0
	Otu01883	Proteobacteria(100)	Gammaproteobacteria(100)	Enterobacteriales(100)	Enterobacteriaceae(100)	Escherichia/Shigella(100)		0	1	0	0	0	0	0	0	0	0	0	0	0	0	0		0	0.00984155	0	0	0	0	0	0	0	0	0	0	0	0	0
	Otu01895	Proteobacteria(100)	Gammaproteobacteria(100)	Enterobacteriales(100)	Enterobacteriaceae(100)	unclassified(100)		0	1	0	0	0	0	0	0	0	0	0	0	0	0	0		0	0.00984155	0	0	0	0	0	0	0	0	0	0	0	0	0
	Otu01898	Proteobacteria(100)	Gammaproteobacteria(100)	Enterobacteriales(100)	Enterobacteriaceae(100)	Escherichia/Shigella(100)		0	1	0	0	0	0	0	0	0	0	0	0	0	0	0		0	0.00984155	0	0	0	0	0	0	0	0	0	0	0	0	0
	Otu01932	Proteobacteria(100)	Gammaproteobacteria(100)	Enterobacteriales(100)	Enterobacteriaceae(100)	Escherichia/Shigella(100)		0	1	0	0	0	0	0	0	0	0	0	0	0	0	0		0	0.00984155	0	0	0	0	0	0	0	0	0	0	0	0	0
	Otu01946	Proteobacteria(100)	Gammaproteobacteria(100)	Enterobacteriales(100)	Enterobacteriaceae(100)	Escherichia/Shigella(100)		0	1	0	0	0	0	0	0	0	0	0	0	0	0	0		0	0.00984155	0	0	0	0	0	0	0	0	0	0	0	0	0
	Otu01968	Proteobacteria(100)	Gammaproteobacteria(100)	Enterobacteriales(100)	Enterobacteriaceae(100)	Escherichia/Shigella(100)		0	1	0	0	0	0	0	0	0	0	0	0	0	0	0		0	0.00984155	0	0	0	0	0	0	0	0	0	0	0	0	0
	Otu02012	Proteobacteria(100)	Gammaproteobacteria(100)	Enterobacteriales(100)	Enterobacteriaceae(100)	unclassified(100)		0	1	0	0	0	0	0	0	0	0	0	0	0	0	0		0	0.00984155	0	0	0	0	0	0	0	0	0	0	0	0	0
	Otu02031	Proteobacteria(100)	Gammaproteobacteria(100)	Enterobacteriales(100)	Enterobacteriaceae(100)	unclassified(100)		0	1	0	0	0	0	0	0	0	0	0	0	0	0	0		0	0.00984155	0	0	0	0	0	0	0	0	0	0	0	0	0
	Otu02033	Proteobacteria(100)	Gammaproteobacteria(100)	Enterobacteriales(100)	Enterobacteriaceae(100)	Escherichia/Shigella(100)		0	1	0	0	0	0	0	0	0	0	0	0	0	0	0		0	0.00984155	0	0	0	0	0	0	0	0	0	0	0	0	0
	Otu02040	Proteobacteria(100)	Gammaproteobacteria(100)	Enterobacteriales(100)	Enterobacteriaceae(100)	Escherichia/Shigella(100)		0	1	0	0	0	0	0	0	0	0	0	0	0	0	0		0	0.00984155	0	0	0	0	0	0	0	0	0	0	0	0	0
	Otu02055	Proteobacteria(100)	Gammaproteobacteria(100)	Enterobacteriales(100)	Enterobacteriaceae(100)	Escherichia/Shigella(100)		0	1	0	0	0	0	0	0	0	0	0	0	0	0	0		0	0.00984155	0	0	0	0	0	0	0	0	0	0	0	0	0
	Otu02083	Firmicutes(100)	Bacilli(100)	Lactobacillales(100)	Leuconostocaceae(100)	Leuconostoc(100)		0	1	0	0	0	0	0	0	0	0	0	0	0	0	0		0	0.00984155	0	0	0	0	0	0	0	0	0	0	0	0	0
	Otu02111	Firmicutes(100)	Bacilli(100)	Lactobacillales(100)	Leuconostocaceae(100)	Leuconostoc(100)		0	1	0	0	0	0	0	0	0	0	0	0	0	0	0		0	0.00984155	0	0	0	0	0	0	0	0	0	0	0	0	0
	Otu02315	Firmicutes(100)	Bacilli(100)	Lactobacillales(100)	Streptococcaceae(100)	Streptococcus(100)		0	0	1	0	0	0	0	0	0	0	0	0	0	0	0		0	0	0.0222965	0	0	0	0	0	0	0	0	0	0	0	0
	Otu02322	Firmicutes(100)	Bacilli(100)	Lactobacillales(100)	Leuconostocaceae(100)	Leuconostoc(100)		0	1	0	0	0	0	0	0	0	0	0	0	0	0	0		0	0.00984155	0	0	0	0	0	0	0	0	0	0	0	0	0
	Otu02328	Firmicutes(100)	Bacilli(100)	Lactobacillales(100)	Streptococcaceae(100)	Streptococcus(100)		0	1	0	0	0	0	0	0	0	0	0	0	0	0	0		0	0.00984155	0	0	0	0	0	0	0	0	0	0	0	0	0
	Otu02337	Firmicutes(100)	Bacilli(100)	Lactobacillales(100)	Leuconostocaceae(100)	Leuconostoc(100)		0	1	0	0	0	0	0	0	0	0	0	0	0	0	0		0	0.00984155	0	0	0	0	0	0	0	0	0	0	0	0	0
	Otu02348	Firmicutes(100)	Bacilli(100)	Lactobacillales(100)	Streptococcaceae(100)	unclassified(100)		0	1	0	0	0	0	0	0	0	0	0	0	0	0	0		0	0.00984155	0	0	0	0	0	0	0	0	0	0	0	0	0
	Otu02374	Firmicutes(100)	Bacilli(100)	Lactobacillales(100)	Leuconostocaceae(100)	Leuconostoc(100)		0	1	0	0	0	0	0	0	0	0	0	0	0	0	0		0	0.00984155	0	0	0	0	0	0	0	0	0	0	0	0	0
	Otu02618	Firmicutes(100)	Negativicutes(100)	Selenomonadales(100)	Veillonellaceae(100)	Veillonella(100)		0	0	1	0	0	0	0	0	0	0	0	0	0	0	0		0	0	0.0222965	0	0	0	0	0	0	0	0	0	0	0	0
	Otu00023	Firmicutes(100)	Negativicutes(100)	Selenomonadales(100)	Veillonellaceae(100)	Megasphaera(100)		0	0	0	0	0	0	0	0	0	0	0	0	0	0	0		0	0	0	0	0	0	0	0	0	0	0	0	0	0	0
	Otu00076	Actinobacteria(100)	Actinobacteria(100)	Actinomycetales(100)	Intrasporangiaceae(92)	unclassified(80)		0	0	0	0	0	0	0	0	0	0	0	0	0	0	0		0	0	0	0	0	0	0	0	0	0	0	0	0	0	0
							TOTAL	2272	10161	4485	4816	8500	8264	19655	5885	14550	34982	15541	18162	12729	8428	17821		100	100	100	100	100	100	100	100	100	100	100	100	100	100	100
											34982	4816															726.37	56.6588
